# Supplementary material for: Comprehensive analysis of circRNA expression profiles and circRNA-associated competing endogenous RNA networks in IgA nephropathy
Source: PeerJ journal article supplement (doi:10.7717/peerj.10395), 2020-12-03
Supplement: Figure_S1.pdf [file Figure_S1.pdf]

**A**

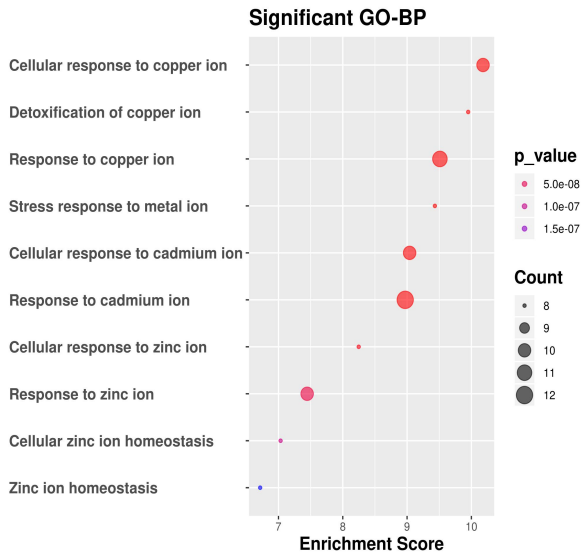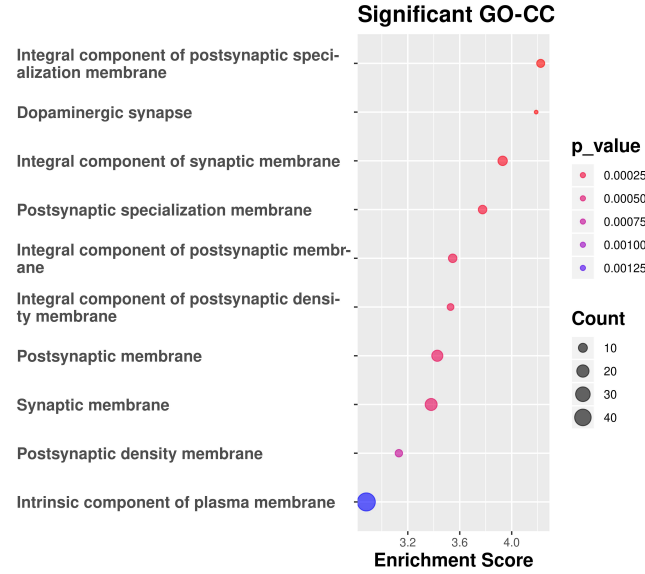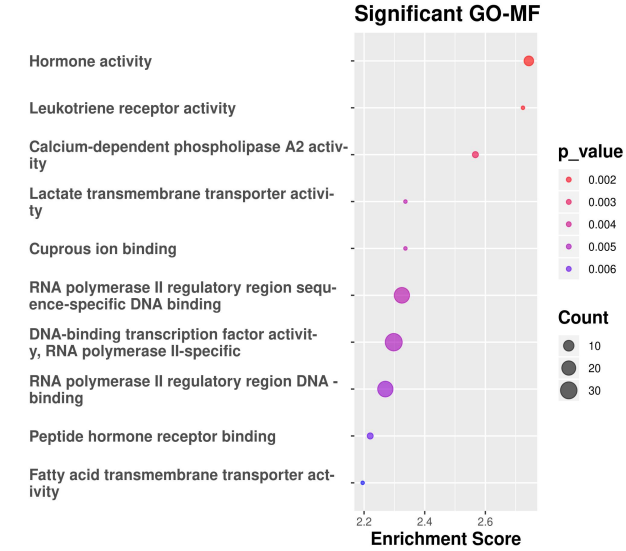

**B**

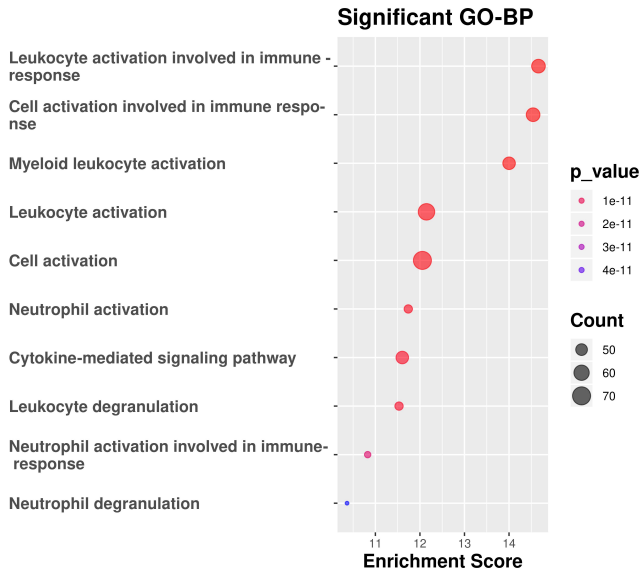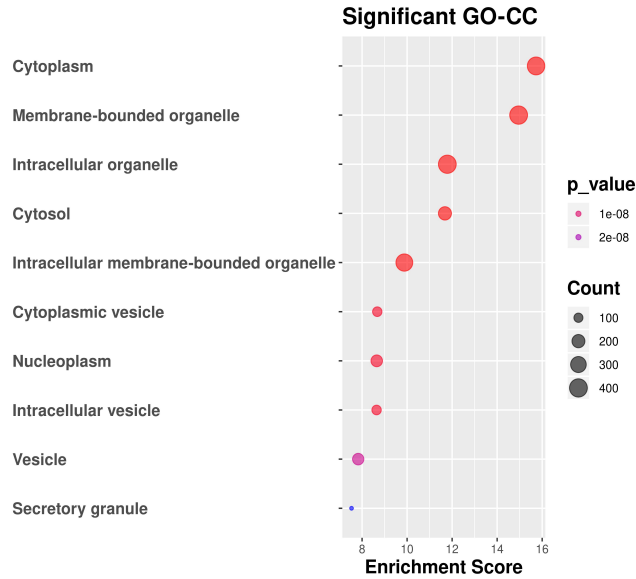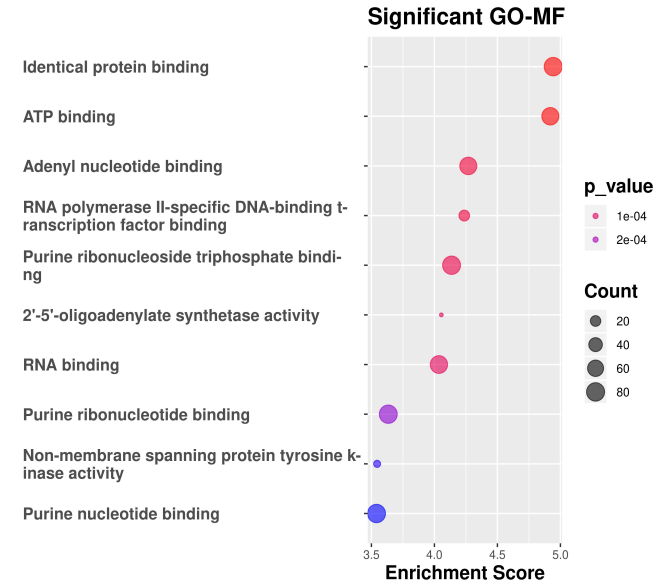

**Figure S1 Top 10 processes revealed in GO enrichment analysis for the DEGs.**

Top 10 GO enrichment process of (A) up-regulated DEGs and (B) down-regulated DEGs, categorized by biological process (BP), molecular function (MF), and cellular component (CC). Red indicates higher enrichment, the sizes of the dots represent the numbers of genes in each GO category.
