# Supplementary material for: Comprehensive analysis of circRNA expression profiles and circRNA-associated competing endogenous RNA networks in IgA nephropathy
Source: PeerJ. 2020 Dec 3;8:e10395. doi: 10.7717/peerj.10395 (PMC7719294; doi:10.7717/peerj.10395)
Supplement: Supplemental Information 5 [file peerj-08-10395-s005.xlsx]

## Sheet: Sheet1
Gene_Name	log2FC	p_value	q_value	IgAN	control	Gene_Name	log2FC	p_value	q_value	IgAN	control
GPR78	5.54145	4.07506e-08	2.29938e-05	11.8101	6.26867	C8orf78	-4.27354	0.0016304	0.0227071	1.36919	5.64273
SLC22A7	5.31032	8.44898e-08	3.3272e-05	7.49817	2.18786	PCDHGA9	-4.24134	0.00164357	0.0228584	1.37339	5.61473
LRFN1	4.00546	1.88684e-08	1.68719e-05	9.53887	5.53341	SEC24C	-3.90258	3.88917e-07	8.34861e-05	2.33286	6.23544
SHANK1	3.78107	0.000506818	0.0102952	5.33155	1.55048	IFI27	-3.4853	7.69739e-05	0.00294596	7.93094	11.4162
PRB3	3.68865	1.78098e-05	0.00110605	10.487	6.79837	UQCRB	-3.18429	0.00179265	0.0240838	5.34189	8.52618
SLC26A1	3.61488	1.1882e-08	1.23504e-05	12.6304	9.01552	LOC391126	-3.13804	0.00378224	0.0394172	8.55015	11.6882
CACNA1H	3.56833	2.7499e-08	1.69316e-05	7.78522	4.21688	CARD16	-2.92092	3.01117e-05	0.00161159	5.35391	8.27483
TMEM217	3.49093	0.000592053	0.011408	5.57	2.07906	F2RL1	-2.76029	2.44981e-07	7.00114e-05	1.68808	4.44837
NLGN2	3.47034	9.44342e-07	0.000149199	6.65542	3.18508	SDHC	-2.73192	1.62505e-06	0.000208397	4.23006	6.96198
TTMA	3.46828	0.000264981	0.00671716	5.64585	2.17757	PABPC4	-2.69799	6.62045e-05	0.00262018	2.86703	5.56502
PRR17	3.45607	2.63679e-07	7.13341e-05	11.5873	8.13121	NOTCH1	-2.64178	0.00011983	0.00398405	4.04071	6.68249
LOC100133154	3.43756	3.25623e-10	1.49915e-06	6.02891	2.59135	LOC389386	-2.62907	5.39457e-05	0.00228621	1.72205	4.35111
CLSTN1	3.35508	0.00304844	0.0340896	7.97393	4.61885	CARD17	-2.62545	4.80742e-05	0.00215902	6.27329	8.89875
KRTAP8-1	3.33296	1.67007e-05	0.00105335	5.37749	2.04453	CYP27A1	-2.61439	0.000276787	0.00684565	4.27051	6.8849
TMEM174	3.29718	3.68695e-07	8.09039e-05	4.74627	1.44909	TSC22D3	-2.60746	1.87299e-06	0.000225547	7.17145	9.77892
ZNF784	2.99652	1.11916e-07	4.09301e-05	7.38459	4.38807	C2orf76	-2.60109	0.00186688	0.0246153	2.52819	5.12927
FAM148A	2.99528	1.7427e-05	0.00108913	11.8589	8.86365	IRF8	-2.59281	4.16934e-05	0.00197759	3.43253	6.02533
HIST1H4B	2.96696	2.95675e-06	0.000317353	11.1594	8.19245	MSTN	-2.57172	6.00559e-17	1.18604e-12	1.17651	3.74822
LOC100128977	2.93621	5.16682e-09	8.09071e-06	10.6526	7.7164	YARS	-2.56932	0.000412596	0.00894442	3.03513	5.60445
DRD2	2.87983	1.06286e-06	0.000157897	7.00172	4.12189	KIAA0495	-2.54403	3.7955e-10	1.49915e-06	1.24248	3.78651
ODF4	2.87493	0.000137761	0.00439522	4.40965	1.53472	TPMT	-2.53627	0.00142349	0.0206558	2.63475	5.17101
C3orf54	2.86115	3.05016e-07	7.61152e-05	11.1	8.23885	ZNF487	-2.51337	0.000337179	0.00774922	2.87595	5.38932
CHRNA4	2.85749	2.67949e-05	0.00147096	9.13466	6.27717	PIN4	-2.4907	3.94219e-05	0.00190093	1.46685	3.95754
ACBD7	2.83835	1.07914e-06	0.000157897	8.56237	5.72402	GPR177	-2.46618	0.00277913	0.0322663	4.47588	6.94205
HIST1H4L	2.71496	1.35929e-05	0.000909986	11.6797	8.96477	TLR10	-2.45224	0.000872621	0.0147799	1.91239	4.36463
BCAS4	2.66914	4.72917e-11	4.66982e-07	8.43483	5.76569	CETN3	-2.44424	0.000255907	0.00657404	1.67214	4.11639
LOC100130600	2.65439	5.86069e-06	0.000525502	5.60431	2.94993	CLEC12A	-2.42756	7.97609e-05	0.00298899	5.29817	7.72574
RP5-886K2.1	2.63224	6.08421e-05	0.00246729	5.5473	2.91506	PTBP1	-2.40324	0.000488652	0.010042	2.38917	4.79241
HIST1H4D	2.60534	3.78265e-05	0.00183999	7.89117	5.28583	LPCAT3	-2.40189	1.14544e-06	0.000163922	3.72541	6.1273
LOC100129292	2.59374	6.39935e-10	2.10635e-06	10.1017	7.50792	hCG_1783494	-2.3894	0.000531957	0.010644	1.72382	4.11322
SOX3	2.57786	2.2362e-06	0.000259781	14.3566	11.7788	GALNT2	-2.38916	6.00943e-06	0.000532129	3.61319	6.00235
ZNF670	2.57509	4.77025e-07	9.23604e-05	6.19197	3.61688	CRK	-2.37552	1.28859e-08	1.27241e-05	4.00539	6.38091
ADAD2	2.54184	0.000196885	0.00549174	4.15439	1.61255	NOMO1	-2.37077	2.01845e-06	0.00024159	4.87407	7.24484
LOC440288	2.53652	2.64838e-08	1.68719e-05	5.36569	2.82917	ITPR2	-2.36913	0.000164619	0.00494082	3.27227	5.6414
PPP3R1	2.53337	1.17951e-06	0.000167584	6.29071	3.75734	RTN1	-2.3542	0.000108584	0.00373593	4.02707	6.38126
LOC652147	2.53025	1.57169e-06	0.000204207	8.83105	6.30081	TNFRSF1B	-2.29121	2.75145e-06	0.000300212	6.99915	9.29036
C7	2.52042	0.00253668	0.0305282	4.80617	2.28575	PDE8A	-2.28663	0.000769854	0.0136972	2.3582	4.64483
METRN	2.49958	0.00133921	0.0197521	7.42245	4.92287	TXNRD1	-2.28176	0.00288982	0.03297	2.74804	5.02979
KRT19P2	2.48418	0.00429407	0.0429386	3.60903	1.12485	LOC100132456	-2.23851	0.00101774	0.016341	1.95407	4.19258
ZNF713	2.47968	4.16201e-07	8.65216e-05	11.2935	8.81385	GFPT2	-2.2301	0.000764457	0.0136276	1.85258	4.08268
MATN4	2.47382	0.00249048	0.0301767	4.67161	2.19779	HCFC1	-2.22853	8.59218e-08	3.3272e-05	1.55372	3.78225
PMEPA1	2.47028	0.000256505	0.00657404	8.57722	6.10693	ZNF263	-2.21785	0.000113048	0.00382293	3.44364	5.6615
GBP6	2.41913	7.4353e-08	3.19217e-05	12.1349	9.71581	RPL36A	-2.19066	0.00392597	0.0404455	11.0871	13.2778
TNR	2.39579	5.39198e-05	0.00228621	4.08449	1.6887	SGOL2	-2.18111	0.000934752	0.0153721	1.6191	3.80021
ASH1L	2.37022	1.39824e-09	3.45172e-06	7.95035	5.58012	SLC43A3	-2.16927	6.67072e-05	0.0026348	3.63258	5.80185
ND5	2.36409	1.51616e-05	0.000984503	9.25313	6.88904	GLMN	-2.15996	0.0013219	0.0195551	2.4905	4.65046
SIX5	2.34297	1.08175e-05	0.000782546	3.51626	1.1733	ARHGEF2	-2.14341	1.10356e-05	0.000792514	5.91864	8.06205
FOXC1	2.34197	0.000119498	0.00398405	6.43804	4.09607	TNPO3	-2.13001	0.000371202	0.00833054	4.09556	6.22557
LOC147645	2.34036	0.00292045	0.0331924	12.4189	10.0785	SLC4A2	-2.12924	0.000401474	0.00878041	2.09928	4.22852
IRGC	2.30838	0.000525766	0.0105629	5.36647	3.05808	MDN1	-2.10984	0.000328637	0.00759982	1.30016	3.41
LGALS7	2.29259	0.00169487	0.0233249	4.52189	2.2293	FLVCR2	-2.10738	0.000102388	0.00361728	1.62977	3.73715
TMEM179	2.27049	0.00010481	0.00368413	3.19378	0.923286	PRKAG1	-2.10505	0.000530726	0.0106305	4.06941	6.17447
NPM3	2.25491	0.00299988	0.0337387	7.25226	4.99735	CYP4F12	-2.10284	0.0042823	0.0428642	1.71332	3.81616
HIST1H4J	2.25432	1.75548e-07	5.41702e-05	8.10041	5.84609	NFRKB	-2.10185	8.33484e-05	0.00309407	1.44219	3.54405
RXFP3	2.24391	7.6061e-07	0.000129494	4.561	2.31709	LASS5	-2.10152	1.10619e-06	0.000160634	4.65248	6.754
C17orf74	2.24381	0.00149082	0.0212579	5.23487	2.99105	FTSJ2	-2.0925	6.29977e-05	0.00252361	4.18447	6.27697
ZC3H7B	2.23735	2.5921e-07	7.1099e-05	6.15338	3.91603	TTYH2	-2.08044	0.000236343	0.00622338	1.99954	4.07998
LOC100131785	2.22517	1.04165e-06	0.000157897	7.00782	4.78265	LOC100130288	-2.07468	0.000939742	0.0153889	2.14785	4.22253
SNCB	2.22422	1.20965e-06	0.000170638	6.72647	4.50225	LYZ	-2.06916	0.00020001	0.00553996	10.1342	12.2034
PLEKHN1	2.21466	0.000110224	0.0037596	4.19946	1.9848	TMEM66	-2.06764	1.16596e-08	1.23504e-05	7.66725	9.7349
DUOXA2	2.18493	7.0339e-08	3.1571e-05	6.83346	4.64853	AHSA1	-2.06492	2.39735e-08	1.68719e-05	6.6524	8.71731
PRAC	2.17849	6.83269e-06	0.000579137	7.16682	4.98832	MINPP1	-2.05361	0.000108082	0.00373168	1.75495	3.80856
CDKAL1	2.14464	4.32893e-07	8.81362e-05	8.28233	6.13769	MOAP1	-2.04717	5.72118e-09	8.09071e-06	4.82318	6.87036
FAM22A	2.14357	3.07505e-05	0.00162385	4.16691	2.02334	DCTN5	-2.0414	0.000462579	0.00969795	3.97497	6.01637
CSDC2	2.13473	3.30209e-05	0.00167898	10.1283	7.99352	PTK2B	-2.04076	5.76729e-07	0.000104557	5.00369	7.04445
HIST1H4C	2.12895	0.000326632	0.0075712	13.3786	11.2497	XRN2	-2.0406	3.15351e-07	7.61152e-05	6.08958	8.13018
LCE1F	2.12868	0.000142541	0.00449201	5.36175	3.23308	ZNF230	-2.02996	0.000749358	0.0134537	3.04864	5.0786
FOXD3	2.1181	3.14335e-07	7.61152e-05	8.20644	6.08834	STAT6	-2.01711	2.87106e-05	0.00154497	10.1327	12.1498
GAST	2.10959	0.000119663	0.00398405	4.28933	2.17975	LOC343515	-2.01674	1.13146e-08	1.23504e-05	7.25566	9.27241
HIST1H1D	2.10224	3.29822e-07	7.75436e-05	8.50257	6.40033	BTD	-2.01457	0.000405792	0.00882597	1.63467	3.64924
MESP1	2.09804	9.937e-07	0.000154524	6.78855	4.69051	GNPDA1	-2.00626	0.000814602	0.0141616	3.27381	5.28007
ASB16	2.09363	5.57643e-05	0.00232831	7.20978	5.11615	ANXA2P3	-2.00204	0.00524315	0.0495915	3.20667	5.20871
ZNF2	2.08882	5.16634e-06	0.000476776	8.01266	5.92384	CUTC	-2.00036	1.52045e-05	0.000984503	5.67093	7.67129
HIST1H4K	2.07965	3.25219e-05	0.00166951	7.60088	5.52123	PSAP	-1.99222	2.73111e-06	0.000299649	9.86894	11.8612
PAX9	2.07219	1.77753e-06	0.000218569	3.38647	1.31428	BAZ2A	-1.99184	5.06207e-06	0.000476051	4.77059	6.76242
GJD3	2.06731	0.000388565	0.00857405	7.44536	5.37805	ZNF366	-1.98606	4.66015e-09	8.09071e-06	1.03433	3.02039
VGLL3	2.05136	7.82944e-05	0.00296081	6.57756	4.5262	FAM18B2	-1.97334	9.58396e-05	0.00344134	4.4953	6.46864
TCF15	2.03475	0.00120465	0.018357	4.75131	2.71656	KIAA0195	-1.96967	0.00245275	0.0298706	3.34461	5.31428
UCP3	2.03188	1.55112e-05	0.000997819	8.69855	6.66668	CTSO	-1.96797	0.00284961	0.0326272	1.69838	3.66635
C1orf84	2.02934	2.15156e-06	0.000255971	4.46856	2.43922	UNC84B	-1.96567	2.44201e-06	0.000274019	5.76588	7.73154
SLC16A8	2.02397	0.000137723	0.00439522	4.98159	2.95763	CHUK	-1.96198	0.00139465	0.0204173	3.48237	5.44435
FN3K	2.01364	0.000122224	0.00403644	3.42992	1.41628	ELK1	-1.95077	1.79431e-06	0.000218569	1.44699	3.39776
AGTR1	2.01042	0.00018217	0.00524342	3.91511	1.90468	CORIN	-1.94942	4.3967e-05	0.00204307	1.41052	3.35994
SPRR2C	2.00236	7.59933e-05	0.00292848	5.9987	3.99634	THOC1	-1.94706	0.000525569	0.0105629	2.7568	4.70386
ARHGEF15	1.99529	0.000789163	0.0139153	7.26539	5.2701	NAGA	-1.94478	0.00284581	0.0326272	4.17011	6.11489
CCDC113	1.96054	5.52975e-05	0.00231371	5.12541	3.16487	HLA-H	-1.94072	6.83038e-07	0.000118327	13.6221	15.5628
MYCNOS	1.95731	5.15713e-06	0.000476776	5.18056	3.22325	DAG1	-1.9335	0.00317975	0.0350234	2.09728	4.03078
HIST1H4E	1.95046	7.35178e-08	3.19217e-05	6.17681	4.22635	IQSEC1	-1.91895	2.05284e-05	0.00122165	6.4206	8.33955
KRT9	1.94883	0.000281154	0.00690009	5.3746	3.42576	NADK	-1.91691	2.33786e-06	0.000269568	8.28968	10.2066
ISOC2	1.93739	6.65401e-07	0.000116292	7.97184	6.03444	KIAA0841	-1.91442	1.45927e-06	0.000197392	1.53478	3.4492
SCRT2	1.93289	0.000318697	0.00748387	11.0572	9.12427	AFG3L2	-1.90666	0.00020633	0.00565946	3.75685	5.66351
ASCL5	1.9121	0.00207628	0.0263524	8.15028	6.23818	OAS3	-1.901	0.000441471	0.0094052	5.77548	7.67649
LGR4	1.90914	3.67846e-05	0.00180263	5.99661	4.08747	ATP5C1	-1.90078	0.00315408	0.0348183	5.98773	7.88851
PRR15	1.88595	8.64364e-05	0.00318476	7.69649	5.81054	PLXNB2	-1.89711	0.000657035	0.0123579	7.19223	9.08933
LOC100132738	1.87748	0.00205177	0.0261037	5.15248	3.275	MGAM	-1.8949	0.00367902	0.0386267	5.96004	7.85493
LOC161635	1.87476	2.27124e-09	4.98385e-06	7.16076	5.286	SLC35B3	-1.89268	1.53079e-05	0.00098796	4.81826	6.71094
ND3	1.87353	4.3012e-05	0.00201765	12.5756	10.702	ACSM3	-1.89261	0.000269616	0.00675856	1.40064	3.29325
MDFI	1.85845	0.000709594	0.0129278	4.17405	2.31561	CASP1	-1.88334	0.000175903	0.00515417	9.80089	11.6842
RNF151	1.84706	0.00432152	0.0431039	3.95845	2.11139	NBPF14	-1.88276	5.96189e-08	2.91898e-05	7.24848	9.13123
ZNF157	1.84654	9.97251e-05	0.00354222	5.81121	3.96467	KARS	-1.88163	2.33638e-08	1.68719e-05	6.10085	7.98248
SLC30A2	1.84509	0.000601857	0.0115523	3.81366	1.96857	SESN3	-1.87889	0.00279317	0.0323428	6.39664	8.27553
PCDHA8	1.84306	2.59908e-05	0.00143378	6.27252	4.42946	FAM168B	-1.8748	5.58641e-07	0.000104081	6.25438	8.12918
PAX4	1.84178	3.13799e-05	0.00163912	7.53897	5.6972	TAF5	-1.86699	0.00188899	0.0247879	2.00085	3.86784
RPL23AP7	1.83881	1.09562e-05	0.000789686	12.9389	11.1001	PISD	-1.8662	8.64776e-06	0.000675038	6.3514	8.2176
HIST1H2AB	1.83741	2.35229e-06	0.000269568	5.19317	3.35576	NEDD9	-1.85008	1.05438e-06	0.000157897	4.89244	6.74253
CCDC26	1.83652	0.000988821	0.0160067	3.47585	1.63934	CYLC1	-1.84359	0.000502141	0.0102552	1.27	3.11359
CYP2B6	1.83289	0.000264727	0.00671716	5.9359	4.10302	ZNF140	-1.84169	0.00476256	0.0461737	2.11644	3.95813
TAS2R60	1.82693	0.00485033	0.0467264	3.74855	1.92162	TIGD7	-1.83708	0.003727	0.0390126	1.95834	3.79542
RHO	1.82538	0.000275668	0.00684565	6.68505	4.85967	ABCB1	-1.83449	0.000143111	0.00449201	2.67238	4.50687
BRUNOL6	1.82516	5.68423e-07	0.000104557	4.93041	3.10525	PIK3R5	-1.81893	1.72793e-07	5.41664e-05	5.73247	7.5514
CASP8	1.82253	0.000352697	0.00800621	10.0213	8.19879	TSC22D1	-1.81742	0.00123647	0.0187119	4.0656	5.88302
CTXN1	1.81947	2.14113e-05	0.00125475	7.09687	5.2774	ENPP2	-1.8142	6.05995e-08	2.91898e-05	1.09135	2.90555
GDF1	1.81268	4.79308e-05	0.00215902	4.5485	2.73582	PSMC5	-1.80554	9.10133e-08	3.39136e-05	6.54563	8.35117
CYSLTR1	1.80806	5.04822e-08	2.62361e-05	6.92227	5.11421	TBL3	-1.80151	0.000864538	0.0147112	3.20257	5.00408
LOC100133315	1.80632	2.59066e-07	7.1099e-05	10.6782	8.87188	STIP1	-1.79957	1.2489e-06	0.000174926	4.46761	6.26719
C20orf144	1.80615	1.38665e-05	0.000922053	6.87642	5.07027	UVRAG	-1.79496	0.00382089	0.0396525	3.96443	5.75938
GDNF	1.80239	0.000764563	0.0136276	10.3496	8.54719	LOC154761	-1.79427	0.00248602	0.0301767	1.501	3.29527
RPL23AP13	1.78743	0.000903091	0.0150961	9.13901	7.35158	DNAJA1	-1.79053	3.72157e-05	0.00181561	8.60867	10.3992
IAPP	1.78123	0.000179641	0.00522576	4.39456	2.61333	PPP1R15A	-1.77987	0.000456795	0.00965872	5.81217	7.59203
GGT5	1.77753	0.000515296	0.0104028	4.2746	2.49707	NUP93	-1.77476	0.000186889	0.00532574	4.89405	6.66881
LCE2A	1.76939	5.68709e-05	0.00236451	6.7989	5.02951	PPP4R1	-1.77171	3.94644e-05	0.00190093	5.2667	7.03841
CHAT	1.76812	0.00352938	0.0375916	3.83233	2.06421	HPCA	-1.76844	0.00092499	0.0153123	4.19971	5.96815
NLRP4	1.76725	0.00386376	0.0399924	2.97212	1.20487	EDAR	-1.76706	2.43468e-07	7.00114e-05	1.11619	2.88325
LOC100129434	1.76352	1.91541e-05	0.00117477	6.02161	4.25809	LOC401717	-1.76252	0.000256348	0.00657404	9.46146	11.224
TERT	1.76152	0.000968838	0.0157478	4.22436	2.46284	ZDHHC18	-1.76169	3.32413e-05	0.00167898	7.10954	8.87124
CTSZ	1.75101	2.25809e-08	1.68719e-05	10.7852	9.03424	TRAFD1	-1.75872	5.00636e-08	2.62361e-05	4.21575	5.97447
SMCP	1.74537	0.001218	0.0184807	3.02938	1.28401	ZRSR1	-1.7575	3.19263e-07	7.61152e-05	4.65532	6.41282
SRCRB4D	1.74409	0.000197157	0.00549174	6.70755	4.96346	NAP1L4	-1.75112	1.40705e-06	0.000192971	6.0262	7.77732
DCST2	1.74044	0.000382774	0.00849371	4.626	2.88555	EPB41L2	-1.74811	0.000933681	0.0153721	1.66122	3.40934
TIMM9	1.73909	2.9915e-06	0.000319347	9.60223	7.86314	ST5	-1.74212	3.96966e-07	8.42978e-05	1.43556	3.17768
IFRG15	1.73822	0.000106549	0.00369812	4.0225	2.28428	DNAJB4	-1.742	1.28644e-05	0.000876066	1.60707	3.34907
DKFZP434A062	1.73529	8.0301e-05	0.0029922	4.3833	2.64801	TRMT61B	-1.74099	2.46709e-05	0.00139207	1.52024	3.26123
C17orf54	1.73367	0.000592093	0.011408	6.95132	5.21766	TBC1D22B	-1.74083	0.000931364	0.0153721	4.03485	5.77568
VWA5B2	1.72531	0.000577892	0.0112746	7.8463	6.121	TP53	-1.74075	1.18806e-05	0.000840966	1.44314	3.18388
FOXN2	1.72083	2.82923e-08	1.69316e-05	9.30505	7.58422	SNAP23	-1.73404	3.29346e-06	0.00034233	6.43477	8.16881
IQGAP3	1.71302	0.00111498	0.0174069	7.47983	5.76681	MID1IP1	-1.73335	5.389e-05	0.00228621	6.19337	7.92672
LOC100128079	1.7021	1.93813e-05	0.00118502	5.46756	3.76547	C2orf74	-1.72953	0.00128091	0.0192078	3.50937	5.2389
ADRA2C	1.6973	0.00166187	0.0230156	2.9521	1.2548	AOF2	-1.72769	0.00462553	0.0451012	3.71215	5.43984
CHRNB2	1.68881	0.000669818	0.0124442	6.69637	5.00756	FLJ11996	-1.72481	3.37953e-10	1.49915e-06	1.2222	2.94701
C20orf181	1.68805	0.00426453	0.0427949	3.93988	2.25183	C11orf66	-1.71422	0.000935722	0.015374	1.74772	3.46193
EMD	1.67955	0.00063539	0.0120195	6.35782	4.67827	C9orf78	-1.71348	0.00231112	0.0285087	9.80963	11.5231
NFATC4	1.67645	1.17558e-05	0.000835125	5.24096	3.56451	C7orf25	-1.71154	0.000494769	0.0101361	3.77174	5.48329
LOC100133075	1.67052	0.000121203	0.00402293	5.82383	4.15332	IGF2R	-1.70754	0.00171151	0.0234351	8.34385	10.0514
LOC100132640	1.66745	0.00215287	0.0270464	7.28943	5.62198	LOC100132831	-1.70654	4.39245e-07	8.85169e-05	5.8016	7.50814
SEL1L	1.6637	0.000302411	0.00722971	6.46751	4.80381	ATP6V1E1	-1.70639	1.65562e-07	5.27369e-05	7.4082	9.11459
C9orf163	1.66329	0.00017041	0.00506246	8.85742	7.19413	CANT1	-1.70423	0.00018374	0.00526916	4.46239	6.16662
ENTPD2	1.66296	0.000290131	0.00703179	7.09727	5.43431	HNRNPAB	-1.70225	6.28073e-06	0.000545618	5.03824	6.74049
CSRP2	1.66112	1.52187e-06	0.000201714	3.77632	2.11521	NLGN4Y	-1.70193	6.98241e-06	0.000587288	1.39721	3.09914
SLC16A1	1.6603	0.000239278	0.00625276	7.51742	5.85712	MAST3	-1.69871	0.00160056	0.0223704	7.217	8.91571
TLX2	1.66029	0.000463965	0.00971669	9.28817	7.62788	GSPT1	-1.6965	0.00379899	0.0395291	6.18814	7.88464
RPLP0P2	1.65747	0.00125956	0.0189671	12.6958	11.0383	NBPF1	-1.694	2.3658e-08	1.68719e-05	4.90563	6.59963
RSHL1	1.65199	9.03325e-05	0.00327335	6.42829	4.7763	EIF2S1	-1.6927	9.83529e-05	0.00351879	4.65727	6.34997
MT1A	1.65164	8.60017e-05	0.00317467	11.8172	10.1655	TTC31	-1.69224	4.75407e-07	9.23604e-05	4.28936	5.9816
SLC6A19	1.65144	0.000924364	0.0153123	7.0632	5.41176	KLF4	-1.68972	4.45073e-06	0.000432992	4.76394	6.45366
HIST1H1E	1.64952	2.19816e-08	1.68719e-05	7.99694	6.34742	LPAR1	-1.68944	0.00434149	0.0432376	1.48866	3.1781
C12orf57	1.64744	0.000298619	0.00716112	11.5118	9.86438	NASP	-1.68888	8.43376e-06	0.00066787	6.66388	8.35276
HAB1	1.64201	3.007e-05	0.00161159	3.43313	1.79112	LOC399881	-1.68716	0.00018383	0.00526916	3.31178	4.99893
FOXS1	1.64174	0.000145866	0.00453083	8.0094	6.36767	KIAA0922	-1.68525	0.000129933	0.00420665	3.11071	4.79596
TAOK1	1.64097	0.000244492	0.00636161	6.10436	4.46338	MRFAP1	-1.68311	9.00131e-08	3.39136e-05	8.92571	10.6088
CXorf15	1.63951	0.000152152	0.00469507	5.41237	3.77286	SNURF	-1.67851	1.56488e-06	0.000204207	5.80119	7.4797
LOC731789	1.63251	0.00185045	0.0245265	3.30586	1.67335	NUPL2	-1.67578	0.00208269	0.0264169	4.12303	5.7988
C5orf24	1.63239	5.38671e-09	8.09071e-06	7.68829	6.0559	LGMN	-1.67131	0.000250428	0.00648193	1.63682	3.30813
LOC729806	1.63042	0.000265937	0.00671716	5.43779	3.80737	SETD1B	-1.67111	0.00027696	0.00684565	4.31861	5.98972
LOC161527	1.63033	0.000176471	0.00516314	5.89417	4.26384	GRM8	-1.66762	0.00333878	0.0364169	1.00176	2.66938
LOC404266	1.62942	0.000230317	0.0061146	5.71115	4.08173	WRNIP1	-1.66711	2.4597e-05	0.00139188	5.40354	7.07065
LOC202181	1.62868	0.00205271	0.0261037	5.82213	4.19344	C10orf63	-1.66536	0.00469659	0.0457362	3.05788	4.72324
SEPT13	1.62805	1.99545e-08	1.68719e-05	6.83762	5.20957	C8orf41	-1.665	7.40824e-07	0.000127222	3.98487	5.64987
FKSG2	1.62611	0.00409668	0.0416609	6.96228	5.33617	VNN2	-1.66419	3.06367e-05	0.00162385	12.8465	14.5106
PRPF19	1.62537	1.47925e-05	0.000964149	4.56171	2.93634	PARG	-1.66325	0.00481225	0.0465412	1.90668	3.56993
LOC100128328	1.62534	0.00359358	0.0380738	2.92612	1.30078	SMARCD2	-1.66192	8.86704e-07	0.000142214	6.81209	8.47401
LCE2C	1.61753	2.37297e-05	0.00135054	5.27418	3.65666	GARNL4	-1.66024	0.000181814	0.00524342	3.67916	5.33941
RPS6P1	1.61564	0.004529	0.0445106	8.44838	6.83274	OAS1	-1.65984	0.000681358	0.0125728	6.75982	8.41965
C16orf11	1.60438	0.00297293	0.0335883	8.29841	6.69403	ZNF638	-1.65903	9.36623e-06	0.000700658	3.57479	5.23382
MAS1L	1.59847	0.000911836	0.0151581	4.73366	3.13519	DYNC2LI1	-1.65847	0.00139923	0.0204692	1.70502	3.3635
GH2	1.59039	0.00223207	0.0277415	6.15201	4.56163	PSMA3	-1.64207	0.000829716	0.0143611	7.60868	9.25075
LOC541472	1.58759	0.000234574	0.00619331	8.3017	6.71412	GRIN3A	-1.62956	0.00367321	0.0385976	1.83057	3.46013
SLC17A4	1.58753	0.00336631	0.0366369	2.84645	1.25893	LPCAT1	-1.62695	2.85708e-07	7.42426e-05	5.18011	6.80706
PAX6	1.58133	0.00303565	0.0340051	2.73383	1.1525	FOS	-1.62457	0.00038396	0.00851046	7.54085	9.16542
DLST	1.58088	4.35147e-05	0.00202682	6.93227	5.35139	LOC81691	-1.61876	3.25465e-05	0.00166951	1.40027	3.01902
C1orf113	1.579	0.00245149	0.0298706	9.08663	7.50762	CYB5B	-1.61803	5.97031e-05	0.00244622	5.48986	7.10789
MED13L	1.57831	4.13759e-06	0.000406534	12.3979	10.8196	ADH5P4	-1.61561	0.00143036	0.0207402	5.66607	7.28168
LOC440917	1.57627	1.25049e-05	0.000857501	6.2388	4.66253	LOC401076	-1.61528	1.3145e-05	0.000889043	6.09288	7.70816
DDT	1.57532	7.4696e-06	0.000608792	10.6671	9.09179	RANGAP1	-1.61511	0.000808918	0.0140876	4.43829	6.0534
BAX	1.57494	0.000155742	0.00473191	10.086	8.51105	CBWD2	-1.60993	2.01298e-05	0.00121202	6.51645	8.12639
MAGEE1	1.56803	1.30201e-05	0.000883619	5.30453	3.73651	GPR97	-1.60603	0.00300162	0.0337387	6.5383	8.14433
FAM138B	1.56715	0.00010197	0.00360898	5.77659	4.20944	DKFZP586I1420	-1.60581	1.24325e-07	4.38446e-05	7.51368	9.11948
LOC100134231	1.55598	6.2994e-05	0.00252361	12.6703	11.1143	CAP1	-1.60434	4.07794e-07	8.56758e-05	9.05898	10.6633
LTB4R2	1.55442	1.75345e-05	0.00109239	5.64887	4.09445	NLGN3	-1.60204	0.00503527	0.0480162	1.43114	3.03319
IPMK	1.55426	0.00201859	0.0258194	4.34906	2.7948	ARPC1B	-1.60124	5.74533e-06	0.00052048	10.8232	12.4244
HSD3B7	1.54602	0.00274601	0.0320935	3.57492	2.02889	XRCC4	-1.60074	0.00269537	0.0316473	4.81688	6.41762
ASTN2	1.54016	4.8052e-05	0.00215902	8.28127	6.74111	DFNA5	-1.59986	0.00518425	0.0491757	1.3616	2.96146
CACNA1C	1.53835	0.00132982	0.0196429	6.6954	5.15705	ZSCAN21	-1.59793	0.000201037	0.00554508	3.09	4.68793
TMEM160	1.53537	4.29548e-05	0.00201765	9.58743	8.05206	KCTD21	-1.59476	0.000963235	0.0156696	1.82209	3.41685
TMEM201	1.53529	4.35114e-05	0.00202682	8.51399	6.9787	PACSIN2	-1.59451	0.000119818	0.00398405	6.97335	8.56786
REST	1.52543	3.47007e-06	0.00035675	6.23464	4.70921	KIAA1522	-1.59405	0.00379177	0.0394748	3.46548	5.05953
KRTAP1-3	1.52527	0.000515688	0.0104028	12.612	11.0867	ANKZF1	-1.59381	0.000628792	0.0119519	5.8119	7.40571
KIF1C	1.52399	1.79989e-06	0.000218569	11.9835	10.4596	HNRNPCL1	-1.59198	1.48922e-07	4.97296e-05	5.97124	7.56321
ZNF785	1.51466	2.31466e-05	0.00132116	4.23568	2.72102	SRP68	-1.58808	8.78275e-05	0.00322399	5.15013	6.73821
SPEF1	1.514	0.00116723	0.017981	9.20614	7.69214	CFDP1	-1.58785	6.42076e-09	8.45357e-06	6.72918	8.31703
LOC201175	1.51394	4.30647e-05	0.00201765	11.322	9.80802	CCDC65	-1.58782	0.00304675	0.0340896	2.66038	4.2482
LOC645251	1.5123	8.01806e-08	3.29893e-05	7.10929	5.59699	PIGS	-1.58612	0.000109126	0.00374806	4.42383	6.00995
LOC100130332	1.50507	7.58425e-09	9.36134e-06	5.99177	4.4867	SERPINI1	-1.58229	0.000574516	0.0112227	1.30256	2.88485
C22orf30	1.50328	0.00034034	0.00779745	5.02365	3.52037	SAT1	-1.58082	2.48154e-07	7.00114e-05	11.477	13.0578
RFX7	1.50326	8.69687e-05	0.00319841	6.95389	5.45063	CBX3	-1.57708	0.000448497	0.00951382	9.36124	10.9383
FLJ11710	1.49295	9.94405e-06	0.00073278	8.0844	6.59145	CHD4	-1.57288	0.00012498	0.00410144	6.99474	8.56762
MRGPRE	1.49275	0.00250162	0.0302538	4.58179	3.08904	TNFSF13	-1.56649	5.46176e-06	0.00049707	5.98301	7.5495
CPNE7	1.48984	0.00436352	0.0433958	6.70637	5.21653	C6orf97	-1.56645	0.000486034	0.0100004	1.56101	3.12746
METT10D	1.48765	5.52868e-05	0.00231371	5.02507	3.53742	XPC	-1.56564	8.80477e-06	0.000677268	5.82512	7.39076
ADAM12	1.48402	0.000820999	0.0142421	3.79813	2.31411	TTC4	-1.56006	0.000182148	0.00524342	4.7018	6.26186
SLC27A1	1.47932	4.79012e-06	0.000457005	10.7018	9.22248	MYO1E	-1.55523	0.00528018	0.0498462	2.62099	4.17622
CA5A	1.46356	0.00188651	0.0247879	4.88125	3.41768	ADM	-1.55428	0.00331208	0.0362384	9.59285	11.1471
TMEFF2	1.463	0.00144762	0.0208554	7.9503	6.48731	LDHAL3	-1.55301	0.00438789	0.0435257	3.01561	4.56861
ATPBD3	1.46237	4.13375e-06	0.000406534	5.50896	4.04659	CXorf26	-1.55221	0.000200869	0.00554508	4.00917	5.56138
SEMA6B	1.45736	0.00381062	0.0395876	8.36381	6.90646	SVIL	-1.54989	0.00162282	0.0226335	6.15677	7.70666
EXOC3L	1.45427	0.000489502	0.010049	5.91028	4.45601	ANAPC7	-1.54861	2.84547e-06	0.000307078	3.10097	4.64958
LPHN2	1.45414	7.94934e-05	0.00298463	4.16578	2.71164	C11orf61	-1.54594	0.000477496	0.00987075	3.95003	5.49596
IL7R	1.45124	4.94832e-05	0.00216456	12.2214	10.7702	PSMC3	-1.54527	2.12173e-05	0.00124709	7.07482	8.62008
NAT6	1.44929	3.48648e-07	7.82438e-05	6.40214	4.95285	USP5	-1.54326	0.00402211	0.0412209	4.1335	5.67676
MT1F	1.44875	0.000132797	0.00428027	7.88155	6.4328	TPD52L2	-1.5425	0.000188499	0.00534099	5.52891	7.07142
C3orf22	1.4464	0.00170754	0.0234019	5.13922	3.69282	HORMAD1	-1.54029	0.000220457	0.00596778	1.35294	2.89323
TMEM151A	1.44499	0.00279296	0.0323428	6.07944	4.63445	LOC643668	-1.53709	3.4282e-07	7.82438e-05	5.10608	6.64317
CSH2	1.44336	0.000320512	0.00749607	3.04844	1.60509	PAK1	-1.53519	0.000154298	0.0047098	7.28143	8.81661
CCDC71	1.44218	0.000644285	0.0121644	6.70949	5.26731	AGPAT6	-1.53482	0.000296873	0.0071495	5.18616	6.72098
MAFA	1.43986	5.42511e-05	0.00229423	11.5155	10.0756	RNPEP	-1.53471	4.17348e-05	0.00197759	5.61346	7.14817
UBE2C	1.43464	0.000626597	0.0119447	7.39428	5.95963	IL2RB	-1.53399	0.000105345	0.00368874	9.34729	10.8813
C1orf96	1.43237	6.95151e-05	0.00272933	5.3583	3.92593	AKTIP	-1.52944	4.87147e-05	0.00215902	3.67318	5.20262
HRASLS5	1.42689	0.000307774	0.00731445	8.67058	7.24369	ANXA2P1	-1.52619	1.69683e-06	0.000213444	7.66607	9.19226
RASL12	1.42645	0.00337662	0.0366381	3.64915	2.2227	TH1L	-1.523	3.74794e-07	8.13386e-05	5.76734	7.29034
KCNC3	1.42404	0.000663661	0.0123881	5.0037	3.57965	TAF4B	-1.5212	6.75954e-05	0.00266456	1.3493	2.87049
AANAT	1.42166	1.80398e-06	0.000218569	5.75075	4.32909	FBXO18	-1.51803	0.000689264	0.0126726	5.67657	7.19459
LOC100131707	1.41991	3.19893e-07	7.61152e-05	7.92704	6.50713	CCDC109A	-1.51484	0.00420326	0.0424604	2.77129	4.28613
LOC729798	1.41786	8.05261e-06	0.000646468	14.1515	12.7337	ARAF	-1.51192	0.000106153	0.00369086	6.07988	7.5918
MAPK15	1.41688	0.00217751	0.0272347	3.40293	1.98605	TTC35	-1.51112	0.000265979	0.00671716	5.75183	7.26296
MGC3196	1.41674	0.000227056	0.00605962	9.38717	7.97042	SACM1L	-1.5108	0.00212941	0.0268568	7.07735	8.58815
LOC654170	1.41398	0.000239149	0.00625276	12.7302	11.3162	GUCY1B2	-1.50957	8.58422e-06	0.000672737	1.21493	2.7245
R3HDM2	1.41346	0.000251056	0.00648967	9.84153	8.42807	KLHDC4	-1.50724	0.00345239	0.0371155	3.78073	5.28797
OGDH	1.40115	0.00428145	0.0428642	7.89936	6.49821	DOCK2	-1.50682	0.000928129	0.0153514	6.10795	7.61477
EFCAB4A	1.4	0.000717416	0.0130272	7.91676	6.51676	HDAC3	-1.50668	0.000895831	0.0150438	4.75944	6.26612
LOC100190986	1.39907	0.000461608	0.00968788	6.31583	4.91676	SLC2A3	-1.50595	0.000310886	0.00735293	5.51367	7.01962
CASZ1	1.39801	0.000166909	0.00500196	4.26836	2.87035	PIGN	-1.50327	0.00171783	0.0234615	1.54161	3.04488
FAM60A	1.39713	2.79036e-06	0.000302784	8.11613	6.71899	FEM1A	-1.50317	0.00144558	0.0208554	4.86334	6.36651
SYMPK	1.39525	0.000304794	0.007261	8.54996	7.15471	EPHX1	-1.49943	5.91051e-05	0.00243181	1.59571	3.09514
CNIH2	1.39327	0.00460941	0.045065	6.35955	4.96628	PBXIP1	-1.4971	0.000142967	0.00449201	7.27738	8.77448
CCR10	1.39242	0.0016972	0.0233249	7.82941	6.43699	GBP1	-1.4966	0.00130736	0.0194319	7.24378	8.74039
SARDH	1.38443	2.5981e-05	0.00143378	5.39979	4.01536	NGRN	-1.49626	6.44912e-05	0.002573	5.75521	7.25148
LOC100131699	1.38273	0.00474727	0.0460934	7.08294	5.7002	TTC5	-1.49612	0.000235611	0.00621239	4.91333	6.40944
SSX2	1.38001	0.000688028	0.0126634	5.23879	3.85878	ASAH1	-1.4921	2.54725e-05	0.00141584	7.41941	8.9115
ZNF524	1.37619	0.000119036	0.00398405	10.0356	8.65946	TADA2B	-1.49176	0.000130206	0.00420859	5.42693	6.91869
RPL36	1.36491	0.00027939	0.00689372	13.0011	11.6361	QARS	-1.48871	7.84887e-05	0.00296081	6.01938	7.50809
FAM57B	1.36353	0.00456514	0.0446985	4.24755	2.88402	PKP4	-1.48861	0.00286444	0.0327561	3.0583	4.5469
PRIC285	1.36226	0.0027399	0.0320559	8.00673	6.64448	RAB20	-1.48538	0.00218758	0.0273087	3.77132	5.25669
PRDM8	1.36045	0.0029183	0.0331924	4.13241	2.77196	LOC646903	-1.48471	0.00159776	0.0223694	0.999215	2.48393
PLXNA3	1.35402	0.0025334	0.0305074	3.74667	2.39265	TMSB4Y	-1.48435	2.6476e-08	1.68719e-05	1.23823	2.72258
RCAN3	1.35249	0.00025665	0.00657404	8.11499	6.7625	DYX1C1	-1.48421	0.000226316	0.00604806	1.21308	2.69729
MAPK11	1.35145	5.31562e-07	0.000101921	7.39027	6.03882	GORASP1	-1.47961	0.00375152	0.0392004	1.70135	3.18097
ARTN	1.3514	0.00372469	0.0390126	9.10206	7.75065	INTS5	-1.4784	3.0123e-06	0.000319839	3.30777	4.78617
BEST4	1.35115	1.8356e-05	0.00112936	11.2806	9.92948	TRIM21	-1.47784	0.00090352	0.0150961	6.03682	7.51466
FOXD1	1.35064	0.00204847	0.0260833	5.62492	4.27428	ARFGAP2	-1.47577	1.19528e-05	0.000843059	4.93348	6.40925
GRRP1	1.34848	2.59864e-06	0.000288318	5.2669	3.91841	SEC16A	-1.47035	0.000340341	0.00779745	6.85354	8.32389
MT1E	1.34557	3.27095e-05	0.00167352	8.84887	7.5033	UHRF1BP1L	-1.46986	6.11165e-06	0.00053644	5.11285	6.58271
IFNA4	1.34464	0.00248894	0.0301767	4.19548	2.85084	C1orf115	-1.46739	0.000204502	0.00562496	1.41716	2.88455
LOC201229	1.34423	4.31136e-05	0.00201765	7.33173	5.9875	TMBIM4	-1.4668	6.22868e-05	0.00251041	8.32219	9.78899
COL9A1	1.34353	0.000853227	0.0146017	4.23914	2.89561	PGS1	-1.46628	0.000106885	0.00370328	4.63448	6.10076
ODF3L2	1.34303	0.00314533	0.03478	6.07403	4.731	PVR	-1.46342	0.000132858	0.00428027	2.6437	4.10712
HIST1H4H	1.34269	2.05371e-05	0.00122165	6.56125	5.21856	RASSF2	-1.4619	2.21354e-06	0.00025867	12.5898	14.0517
LOC391282	1.33955	0.000781707	0.0138209	10.1657	8.82619	HSDL1	-1.46112	0.00272986	0.0319586	2.17198	3.6331
LOC728428	1.3374	5.15059e-06	0.000476776	13.2146	11.8772	FOXK1	-1.45959	1.20818e-05	0.000846108	4.29756	5.75715
FLJ11235	1.33703	0.000262447	0.00669648	4.96336	3.62632	API5	-1.4586	2.55223e-05	0.00141584	4.54742	6.00602
LOC401504	1.33544	0.000200931	0.00554508	7.9474	6.61196	PRKAB1	-1.45357	7.99749e-05	0.00299134	5.50081	6.95438
MAP3K10	1.32674	8.45448e-06	0.00066787	7.04207	5.71533	EWSR1	-1.4506	3.16222e-05	0.00163912	4.7384	6.18899
TUG1	1.32584	2.54865e-05	0.00141584	9.99758	8.67174	APOBEC3B	-1.44405	0.000252808	0.00651789	8.46877	9.91282
LOC100190890	1.32532	0.00141432	0.0205973	4.89369	3.56837	IFIT3	-1.44299	0.0034702	0.0372462	8.21989	9.66288
C21orf86	1.32508	0.00022484	0.00601677	4.39378	3.0687	SEC11B	-1.44273	3.31473e-05	0.00167898	5.7316	7.17433
LOC100131737	1.32382	0.000459269	0.00966963	4.01579	2.69198	RPN2	-1.43933	6.20542e-05	0.00250615	6.84203	8.28136
HAR1A	1.32282	0.00108479	0.0170609	7.81072	6.4879	SGCE	-1.43837	0.00102192	0.0163843	1.967	3.40537
FLJ12331	1.32134	0.000303114	0.00722971	10.5227	9.20138	CAB39	-1.4382	0.000142863	0.00449201	7.30395	8.74214
LRRC37A2	1.31714	0.000669083	0.0124423	6.89259	5.57545	ANP32C	-1.43803	3.37549e-05	0.0016834	4.19522	5.63324
LOC100130274	1.31702	0.000915376	0.0151914	4.77229	3.45527	MARCKSL1	-1.43621	1.44528e-06	0.000196847	5.74877	7.18498
TAF15	1.31628	1.54062e-07	4.98781e-05	10.0979	8.78161	PKD2L1	-1.43467	0.000914517	0.0151899	1.62598	3.06065
POLR2J2	1.3152	0.000324097	0.00756036	8.81993	7.50472	STX11	-1.43006	1.37801e-06	0.000190768	7.07169	8.50175
GNRH2	1.31192	0.000197043	0.00549174	6.25917	4.94725	PEX5	-1.42656	0.00281396	0.0324135	1.86336	3.28992
GPC1	1.31013	0.000627533	0.011951	5.65209	4.34197	ZNF57	-1.42093	0.00197293	0.0255497	3.09772	4.51865
MT1X	1.30972	0.000127777	0.0041503	10.2288	8.91912	GBA2	-1.42089	0.00128925	0.0192397	4.76059	6.18148
XIAP	1.30641	1.66189e-06	0.000210389	6.16621	4.8598	ATP6V1D	-1.419	3.4864e-06	0.00035675	7.58148	9.00047
NUP43	1.29982	1.51085e-07	4.97296e-05	7.46506	6.16524	EXTL2	-1.41783	0.00187659	0.0247072	1.23139	2.64922
KRTAP19-1	1.29879	0.0041258	0.0418707	3.85306	2.55427	AP2M1	-1.41773	0.00111412	0.0174069	8.32086	9.7386
CCIN	1.2982	0.002258	0.0280109	5.99632	4.69811	LACTB	-1.41653	2.68139e-05	0.00147096	5.05372	6.47025
GRIK5	1.298	0.0007393	0.0133216	4.00654	2.70854	SMARCB1	-1.41383	0.000142337	0.00449201	3.7708	5.18462
C9orf62	1.29781	0.000297217	0.0071495	13.72	12.4222	NDUFB5	-1.41214	0.000379868	0.00847464	4.79225	6.20439
OLFML1	1.29721	0.00218099	0.027261	3.9986	2.7014	CTAGE1	-1.40872	6.64288e-06	0.000567923	1.86837	3.27709
FLJ43276	1.29522	0.000409769	0.00889288	6.2722	4.97698	FAM120B	-1.40829	0.000111654	0.00378875	4.54751	5.9558
CD226	1.29351	0.000203608	0.00560817	5.92853	4.63501	UPF2	-1.40332	2.25411e-07	6.74491e-05	4.91387	6.31719
INTS1	1.29297	0.00406664	0.0415049	3.38338	2.09041	SUMO1	-1.40163	2.71673e-07	7.15369e-05	4.1183	5.51993
SRP72	1.29053	0.000708629	0.0129222	9.37621	8.08568	DNA2	-1.3988	0.00362771	0.0382907	1.55998	2.95879
PGBD4	1.29001	0.000145468	0.00453083	4.72885	3.43884	SEMA4D	-1.39822	0.00201813	0.0258194	6.01114	7.40936
TMEM191B	1.28764	0.00347708	0.037269	13.4283	12.1407	ZNF498	-1.39554	0.000172288	0.00510122	3.78799	5.18353
HSP90AB3P	1.28761	0.00371282	0.0389303	5.99195	4.70433	SEC23B	-1.39483	7.75968e-07	0.000130979	5.91119	7.30602
LOC440894	1.28753	0.0048913	0.0470523	7.55037	6.26284	CHI3L2	-1.392	0.00241509	0.0295146	4.94064	6.33265
SLC27A5	1.28662	0.00108381	0.0170609	7.4944	6.20778	ARID4A	-1.38909	0.00010997	0.00375744	4.17033	5.55941
tcag7.350	1.28607	0.0016029	0.0223873	11.607	10.321	GADD45A	-1.38575	9.53724e-05	0.0034308	5.78972	7.17547
HIST1H4F	1.27884	2.0698e-05	0.0012219	5.8722	4.59337	C18orf57	-1.38498	0.000890594	0.014996	1.17396	2.55894
HMX1	1.27792	0.00141713	0.0206047	4.35765	3.07973	SLC35A5	-1.38432	0.0013145	0.0195027	4.37727	5.76159
PRNP	1.27748	2.98534e-08	1.73405e-05	14.2922	13.0147	CSK	-1.38426	7.41198e-06	0.000608792	8.27951	9.66377
LOC400986	1.27629	0.000450905	0.00954439	6.77663	5.50034	PI4KA	-1.38335	0.000995619	0.0160689	7.49303	8.87638
ZNHIT1	1.27574	9.61833e-07	0.000150756	11.4769	10.2011	SDF4	-1.38314	1.06233e-06	0.000157897	9.60147	10.9846
HIST1H4I	1.27559	2.75832e-05	0.00150481	6.32795	5.05236	POU6F1	-1.38275	0.000578315	0.0112746	3.48041	4.86315
PAK4	1.27511	0.00190313	0.024881	6.57395	5.29884	C3orf62	-1.38089	0.00203075	0.0259385	4.61883	5.99972
MRPL55	1.27501	4.81957e-06	0.000457604	9.93477	8.65976	ADPGK	-1.37905	2.60085e-08	1.68719e-05	7.06722	8.44628
CEACAM19	1.27385	0.00257975	0.0307839	9.51346	8.2396	LOC100128056	-1.37466	9.60673e-06	0.000713245	6.29282	7.66748
LOC729602	1.27262	8.86361e-05	0.00324142	6.1604	4.88779	CLK2	-1.37111	6.98834e-06	0.000587288	4.59455	5.96566
CXorf42	1.27095	1.26046e-05	0.000861341	5.90639	4.63544	NAMPT	-1.36834	0.000784014	0.0138493	11.1884	12.5568
HIST2H4B	1.2689	7.62566e-05	0.00292994	6.96736	5.69846	GMFG	-1.36825	0.00428006	0.0428642	13.4955	14.8637
LOC127099	1.26847	2.3614e-06	0.000269568	11.5756	10.3072	RGS2	-1.36798	4.76145e-05	0.00215902	13.4633	14.8312
C1orf152	1.26708	9.88142e-05	0.00352369	12.701	11.4339	LOC441294	-1.36378	3.13811e-05	0.00163912	3.69423	5.05801
UTP23	1.26668	2.18497e-06	0.000256852	6.39291	5.12624	FERMT3	-1.36323	0.000971874	0.0157712	7.73158	9.09481
ALKBH7	1.26518	0.00129178	0.0192539	10.3501	9.08488	SEMA4A	-1.36184	0.00125795	0.0189671	5.76701	7.12884
LOC730038	1.26207	0.000587351	0.011361	5.3251	4.06303	MPRIP	-1.35517	3.19417e-05	0.00165135	6.61126	7.96643
TAF3	1.26055	4.68036e-05	0.00214959	7.78713	6.52658	TERF2	-1.35425	0.000386833	0.00856013	4.4595	5.81375
ZNF345	1.25931	0.00178409	0.0240505	5.26359	4.00428	GPR108	-1.35307	0.000806004	0.0140719	6.65593	8.009
ALKBH8	1.25863	0.000896579	0.0150438	4.84615	3.58752	FAM45B	-1.35265	7.95029e-07	0.00013306	5.32412	6.67677
FAM119A	1.25626	2.03015e-05	0.00121665	9.91052	8.65426	MCOLN1	-1.3523	0.000157066	0.00476481	6.2951	7.6474
STRN	1.25441	0.00010957	0.00375678	3.58246	2.32805	GRN	-1.35064	0.000896057	0.0150438	14.0517	15.4023
PAFAH1B3	1.25299	0.000150401	0.00465558	7.62016	6.36716	STK38	-1.34515	1.27863e-09	3.45172e-06	7.17173	8.51688
NDUFB10	1.25212	0.00014069	0.00446701	10.7252	9.47308	LILRA2	-1.34342	0.000870174	0.0147638	7.77136	9.11478
KIAA1539	1.25157	0.0016505	0.0229321	8.25003	6.99846	HCK	-1.34096	0.00240808	0.0294472	10.1466	11.4876
PBLD	1.24946	0.00261974	0.031047	5.55555	4.30609	PKIG	-1.34088	0.00366	0.038509	4.25345	5.59433
LOC149501	1.24808	0.000512588	0.0103827	5.26036	4.01228	MNS1	-1.34055	0.00154438	0.0218145	0.890669	2.23122
ACIN1	1.24788	6.5994e-05	0.0026171	6.90047	5.65259	BST1	-1.34014	3.04519e-06	0.000321602	8.35333	9.69347
C19orf26	1.24673	0.0013705	0.0201275	3.23188	1.98515	HIF1AN	-1.33685	0.00215684	0.0270791	3.68369	5.02054
NEK8	1.24593	0.000587198	0.011361	5.13705	3.89113	SLC17A1	-1.33289	0.00395398	0.0406704	1.16215	2.49503
SFN	1.24145	0.00126414	0.0190141	4.43394	3.19249	DDX55	-1.32977	0.00116195	0.0179137	4.08525	5.41503
RPL13L	1.23704	3.72334e-05	0.00181561	6.83068	5.59364	PAPPA2	-1.32901	1.80161e-06	0.000218569	1.06662	2.39562
GNAO1	1.23679	0.000196483	0.00549174	3.17802	1.94123	CPSF1	-1.32836	0.00103101	0.0165138	5.66886	6.99722
LOC648232	1.23208	0.00298454	0.0336618	5.64945	4.41737	PRMT5	-1.32795	4.83071e-05	0.00215902	6.0332	7.36115
ORC6L	1.22967	8.48264e-05	0.00313715	10.6907	9.46103	UAP1	-1.322	0.00084898	0.0145669	4.29497	5.61696
ROMO1	1.22391	0.000245139	0.00637006	10.217	8.99313	PPP4C	-1.32184	0.000121513	0.00402645	7.10394	8.42578
C19orf60	1.22173	6.03559e-06	0.000532129	10.7207	9.49901	ARHGAP30	-1.31939	0.000552435	0.0108989	8.33704	9.65643
GPR135	1.2195	8.21848e-08	3.31238e-05	3.79584	2.57634	STAT3	-1.31925	0.00505957	0.0482013	6.44014	7.75939
SGCA	1.21748	0.000136872	0.00438813	5.23105	4.01357	PCMT1	-1.31855	3.11166e-05	0.00163436	6.66687	7.98542
UBE2DNL	1.21537	0.00414558	0.0420067	4.08227	2.8669	ALOX5	-1.31796	0.000865581	0.0147112	12.4146	13.7326
HMHB1	1.21523	6.585e-05	0.00261664	6.44194	5.22671	C16orf62	-1.31691	0.00115439	0.017811	4.7361	6.053
SLC5A3	1.21512	4.87442e-05	0.00215902	4.35881	3.14369	SLC15A2	-1.31402	4.85437e-05	0.00215902	1.28082	2.59484
LOC51233	1.21492	0.000617111	0.0118209	8.05476	6.83984	TSR2	-1.31087	0.000188371	0.00534099	5.17414	6.48501
LOC376693	1.21317	0.0036315	0.0382907	12.817	11.6038	LTBR	-1.31053	0.000837278	0.0144667	6.82961	8.14015
ZNF409	1.21239	0.0019909	0.0256479	5.66821	4.45582	CD97	-1.30733	0.00184739	0.0245265	12.2701	13.5774
TAS2R14	1.20996	0.00313654	0.0347412	3.47668	2.26672	TCERG1	-1.30706	0.00211902	0.0267745	5.01461	6.32167
MALAT1	1.20939	0.000476672	0.00986771	12.2468	11.0374	AXUD1	-1.30588	0.000675896	0.0124984	5.35951	6.66539
HIST2H2AC	1.2091	7.10012e-06	0.000592792	10.0131	8.80395	CPNE1	-1.30581	0.000281059	0.00690009	7.0144	8.32022
ZFAND2B	1.2085	2.17602e-06	0.000256852	9.82878	8.62028	THAP11	-1.30491	1.50951e-06	0.000201428	5.70274	7.00765
ORAI1	1.2084	0.000821395	0.0142421	12.5396	11.3312	RPAIN	-1.30394	0.00198043	0.0255798	6.14311	7.44705
DHH	1.20598	0.00291544	0.0331924	6.52069	5.31471	CAMK1	-1.30349	0.000360086	0.00811796	5.07424	6.37772
SSH1	1.20589	0.00233756	0.028745	5.99278	4.78689	CPOX	-1.30095	7.16206e-05	0.00278981	4.44937	5.75032
AHR	1.2039	0.000106112	0.00369086	7.98637	6.78247	CORO1A	-1.30051	0.00103301	0.0165324	11.6318	12.9323
DUSP9	1.1994	0.000122514	0.00403926	5.44185	4.24245	GTF2E2	-1.29883	0.000182401	0.00524342	5.95372	7.25255
CRCP	1.19852	0.000443464	0.00942732	5.25173	4.05321	SNX27	-1.29777	0.00191014	0.0249163	7.37428	8.67205
AVP	1.19787	0.00491845	0.0472214	8.75837	7.5605	IWS1	-1.29663	1.07935e-06	0.000157897	4.702	5.99863
SCARNA17	1.19711	0.00066118	0.0123829	12.2684	11.0713	QSOX2	-1.29516	0.000174019	0.00512175	4.09917	5.39432
LOC100132815	1.19481	3.67409e-06	0.000370666	5.55324	4.35843	ZNF44	-1.29457	0.00307523	0.034293	3.58886	4.88343
ZNF234	1.1933	0.00406966	0.0415143	7.23911	6.04581	ATP1A3	-1.29368	4.94363e-05	0.00216456	5.86069	7.15437
DAPK3	1.18902	5.49084e-05	0.0023072	6.20279	5.01377	FAM167A	-1.29298	1.65106e-06	0.000210367	1.05024	2.34322
PLA2G1B	1.18722	0.00309076	0.0343691	2.32928	1.14206	CAMK2N2	-1.29196	0.000246197	0.00638915	6.82763	8.11959
ZNF800	1.18714	0.00331496	0.0362498	6.14551	4.95837	FLII	-1.29157	0.00255681	0.0306313	9.04106	10.3326
C9orf24	1.18668	0.00077205	0.0137122	4.42153	3.23485	NRBF2	-1.28978	0.00106576	0.0169058	6.8587	8.14848
WASH5P	1.18064	0.000719578	0.0130376	5.82766	4.64701	ZNF227	-1.28786	0.00421682	0.0425105	3.09355	4.38141
FXYD5	1.17831	1.06817e-05	0.000778427	10.9897	9.81139	PTPLA	-1.28763	2.42569e-07	7.00114e-05	1.30163	2.58926
MT1B	1.17759	0.00018559	0.00530422	10.4277	9.25013	PDIA6	-1.2857	1.94449e-05	0.00118524	7.77245	9.05815
NUDT8	1.17724	0.00043832	0.00934815	6.91959	5.74235	LOC401218	-1.28482	0.000216161	0.00587203	4.10698	5.39181
PL-5283	1.17704	0.00305767	0.0341467	4.96517	3.78813	SHFM1	-1.28431	0.00346444	0.0372045	8.54643	9.83073
C11orf9	1.17422	0.00290192	0.0330889	7.47177	6.29755	BCL6	-1.28424	0.00185887	0.0245722	11.0454	12.3296
NOTCH2NL	1.17377	0.000331462	0.00764726	7.1469	5.97313	LOC644936	-1.28383	0.000196945	0.00549174	10.9499	12.2338
STX2	1.17174	0.00016268	0.004905	5.40546	4.23372	PGRMC1	-1.28325	0.000230663	0.0061146	4.42352	5.70676
MUC3A	1.17116	0.00425844	0.0427772	5.61086	4.43969	PSMD13	-1.27708	3.92094e-06	0.000389119	7.8167	9.09379
ALCAM	1.16966	0.000477819	0.00987075	3.70496	2.5353	DNTTIP2	-1.27541	0.00150862	0.0214652	7.70786	8.98328
LOC751071	1.16858	0.000859345	0.0146556	5.77359	4.60501	RNF20	-1.27369	6.15873e-07	0.000109575	5.86223	7.13592
CCL19	1.16822	0.00189702	0.0248581	3.9331	2.76487	PLD3	-1.27306	0.00213375	0.0268747	4.69488	5.96794
DDX6	1.16686	1.32265e-05	0.000891505	7.69341	6.52655	SLC25A43	-1.27255	0.000276365	0.00684565	3.44611	4.71867
APPL1	1.16674	3.50719e-06	0.000357028	8.19959	7.03285	ZNF479	-1.27247	0.00473998	0.0460678	1.1943	2.46677
AYP1p1	1.16613	0.000181747	0.00524342	4.65651	3.49038	FIG4	-1.27206	1.08083e-05	0.000782546	5.16816	6.44021
PITX3	1.1657	0.000145911	0.00453083	4.49296	3.32726	HNRNPA2B1	-1.27057	1.23052e-07	4.38446e-05	8.27257	9.54314
TMUB1	1.16466	9.19585e-06	0.000693163	9.76197	8.59731	MAP7D1	-1.26867	0.00167276	0.0231002	9.84414	11.1128
ZNF576	1.16285	7.71094e-06	0.000621565	5.86223	4.69938	ALDH18A1	-1.26774	6.56236e-06	0.000563479	6.03691	7.30465
ZNF720	1.15804	0.000232207	0.00614726	4.76427	3.60623	HDGF2	-1.26755	0.0033367	0.0364169	4.71832	5.98587
WDR54	1.15592	0.000229377	0.00610508	7.8361	6.68018	ACTR1B	-1.26691	1.14187e-05	0.000814111	6.01286	7.27977
GPHB5	1.15517	0.00116962	0.0180038	5.24257	4.0874	RRAGD	-1.25856	0.00339288	0.0367156	4.84866	6.10722
NEUROD2	1.15466	0.000163225	0.00490644	3.24053	2.08587	LOC441768	-1.25679	0.00426322	0.0427949	7.8982	9.155
RPS13	1.15155	0.000662142	0.0123829	13.9016	12.7501	YIPF3	-1.25403	2.16047e-05	0.00126234	9.33707	10.5911
C21orf88	1.1499	0.0030159	0.0338415	7.13885	5.98895	TNIP2	-1.25384	7.68112e-08	3.22754e-05	5.47968	6.73351
TMEM222	1.14871	1.32092e-07	4.57663e-05	7.9899	6.84119	BRD7P3	-1.25364	2.95421e-07	7.57698e-05	6.09563	7.34927
UQCR	1.1476	0.00355319	0.0377675	11.392	10.2444	GNAI2	-1.25317	1.56627e-05	0.00100429	7.86016	9.11333
AQP8	1.14474	0.00377182	0.0393501	4.17866	3.03392	FAM32A	-1.25086	0.000314131	0.00740308	7.74356	8.99441
COL4A2	1.14463	0.00162656	0.0226697	5.58626	4.44162	LOC158345	-1.25037	0.00169696	0.0233249	10.4688	11.7191
PTMAP7	1.14361	0.000298788	0.00716112	9.75674	8.61313	CROT	-1.24839	8.59962e-07	0.000139208	1.07792	2.3263
MT1H	1.14189	0.000147449	0.00457137	10.2364	9.09453	TEC	-1.24824	0.00473347	0.0460272	1.9006	3.14884
FAM158A	1.14188	0.000346396	0.00789951	5.80615	4.66427	RXRB	-1.24678	4.88674e-05	0.00215902	6.34054	7.58732
C10orf35	1.13992	0.00493378	0.0472996	6.42768	5.28776	MAPK9	-1.24393	8.41868e-06	0.00066787	3.46797	4.7119
NUDT18	1.13728	0.00309648	0.0344132	7.76007	6.62279	CD300C	-1.24345	3.15084e-05	0.00163912	5.77511	7.01856
FSCN2	1.13647	0.00378781	0.0394544	4.28147	3.14501	LASS2	-1.2408	8.8135e-06	0.000677268	8.27826	9.51906
LOC493754	1.1353	0.00198576	0.025608	10.1788	9.04349	DNAJA3	-1.23875	0.000153892	0.0047098	7.7867	9.02544
ZNF292	1.1344	5.54985e-07	0.000104081	7.76091	6.6265	HOMER3	-1.23707	5.9072e-06	0.000525502	9.66964	10.9067
PABPC3	1.1333	0.000198768	0.00552105	11.273	10.1397	PHRF1	-1.23618	1.00193e-05	0.000734882	10.1842	11.4203
LOC392522	1.13232	0.000458339	0.00966034	11.1774	10.0451	UBR5	-1.23436	0.000217052	0.00588813	4.56121	5.79557
HIST1H2AE	1.13102	0.000530075	0.0106305	8.62824	7.49722	PTRH2	-1.23361	0.000302977	0.00722971	8.41185	9.64546
A2ML1	1.13071	0.0025306	0.0304922	7.4392	6.3085	HMGN3	-1.23185	8.91539e-06	0.000677413	5.70108	6.93293
LOC644384	1.13071	0.000460192	0.00967874	12.5467	11.416	MAPKAP1	-1.22978	0.0022857	0.0282656	4.12698	5.35676
LOC283701	1.12442	4.17567e-05	0.00197759	5.68782	4.5634	WDR17	-1.22945	0.00107348	0.017001	1.24653	2.47598
ACBD5	1.12348	0.0002909	0.00703179	6.42292	5.29945	HSPE1	-1.22907	0.00197796	0.0255798	9.55962	10.7887
UBE2V1	1.12322	1.38133e-06	0.000190768	8.87155	7.74833	PDE6D	-1.22902	0.000852881	0.0146017	5.68111	6.91013
CCL24	1.12212	0.00114612	0.017711	10.8486	9.72644	ZNF23	-1.2283	0.000458256	0.00966034	3.10414	4.33245
LOC400236	1.12208	9.51307e-06	0.000708957	6.00887	4.88678	CBX4	-1.22712	2.24396e-05	0.00128452	4.83044	6.05756
KRTAP5-9	1.11994	0.00228311	0.0282513	7.32066	6.20072	C14orf138	-1.22425	0.00393079	0.040474	6.29167	7.51592
NENF	1.11756	0.000249452	0.00646513	9.00548	7.88792	STX3	-1.22401	0.000418192	0.00904586	6.89988	8.1239
DSPP	1.11705	0.00508777	0.0484233	2.39863	1.28159	SLC25A41	-1.2238	0.00414845	0.0420142	1.47068	2.69448
ATP5D	1.11634	0.000150989	0.0046665	9.63809	8.52175	DHX29	-1.21911	4.57982e-06	0.000441204	5.13094	6.35005
CLPP	1.11563	0.000327491	0.00758221	10.9543	9.83871	PIK3CB	-1.21405	0.000415444	0.00899628	3.74904	4.96309
MPP7	1.11427	3.35824e-05	0.0016834	5.26977	4.1555	AIM2	-1.21335	0.00183607	0.0244178	6.76488	7.97824
SLC17A5	1.11426	2.81037e-05	0.00151645	4.94082	3.82656	LOC642006	-1.212	0.00157739	0.022188	1.39062	2.60262
MT1L	1.11242	0.000443147	0.00942732	10.2972	9.18474	FBXL11	-1.2119	0.00165389	0.0229373	5.94646	7.15836
CHAC1	1.11172	1.83565e-05	0.00112936	8.35699	7.24527	KBTBD2	-1.21163	6.47435e-07	0.000114162	5.80877	7.0204
LOC728153	1.11083	0.00341886	0.0368477	4.76076	3.64993	TXNIP	-1.21086	3.63391e-05	0.00178527	14.9119	16.1228
SPATA13	1.11039	6.02735e-05	0.00245938	7.94638	6.83599	ZNF513	-1.21038	0.00300332	0.0337387	4.95216	6.16254
SCARA5	1.11021	0.000750878	0.013459	5.48998	4.37977	TOR1B	-1.20879	1.06495e-06	0.000157897	6.0397	7.24849
PDE7A	1.11	7.24539e-06	0.000601215	7.39766	6.28766	SLC35D2	-1.20737	0.00305866	0.0341467	4.53723	5.7446
C20orf29	1.10814	5.89559e-05	0.00243073	7.7073	6.59917	ATPAF1	-1.2073	1.0047e-05	0.000734882	4.54433	5.75162
C1orf71	1.10781	0.000468384	0.00977769	6.14939	5.04158	HLA-B	-1.20555	0.000109772	0.00375719	14.4071	15.6126
FAM38B	1.1069	0.000468858	0.00977769	4.0932	2.9863	ARHGAP15	-1.20369	3.65923e-07	8.09039e-05	7.38576	8.58945
MOGAT3	1.10501	0.000700104	0.0127785	5.20798	4.10297	GRAMD1A	-1.20219	0.000268936	0.00675729	4.51539	5.71758
KLC3	1.10307	0.00159822	0.0223694	14.2866	13.1835	ANP32D	-1.20179	5.74577e-05	0.00238015	5.33581	6.53761
SYNJ2BP	1.10249	4.88077e-05	0.00215902	5.93742	4.83493	SFRS9	-1.2014	4.53147e-07	9.0396e-05	7.78526	8.98666
LOC100131310	1.10183	4.77412e-05	0.00215902	12.5606	11.4588	IL18	-1.19945	0.000187152	0.00532574	3.63047	4.82992
SNX26	1.10166	1.6292e-08	1.53215e-05	16.2744	15.1727	TTYH3	-1.19665	0.000801742	0.0140369	5.85172	7.04837
LAMA4	1.1009	0.000472011	0.00981237	3.0301	1.9292	TTLL1	-1.19603	0.000692769	0.0126849	3.93268	5.12871
PLA2G2D	1.10086	0.0048215	0.0465851	2.85175	1.75089	PLAUR	-1.19565	0.00210112	0.0265823	7.12202	8.31768
MT1G	1.09822	0.000315808	0.00742488	9.81261	8.71439	NCF4	-1.19555	0.00434951	0.0432956	8.49843	9.69398
PSPH	1.09813	0.00478366	0.0462874	8.82931	7.73118	OAS2	-1.19539	0.00407879	0.041586	5.21429	6.40968
TMEM208	1.09732	7.56326e-05	0.00292303	10.5615	9.46414	DOCK9	-1.19471	9.13419e-05	0.00330387	4.39547	5.59018
PTPLB	1.0968	0.000105171	0.00368874	6.50086	5.40407	CHRNA2	-1.19462	7.65685e-05	0.00293622	1.0961	2.29072
TMEM141	1.09594	0.00122366	0.0185322	9.9651	8.86916	MYST2	-1.19453	0.00140678	0.020534	4.79412	5.98865
C15orf51	1.09404	0.00104063	0.0165915	3.41003	2.31599	CRTC3	-1.19392	2.41606e-05	0.00137111	5.01199	6.20591
ZNF609	1.09162	0.000193301	0.0054458	8.90651	7.81489	FGL2	-1.19386	0.000189031	0.0053484	11.4612	12.6551
CHCHD10	1.0916	0.00238429	0.0291924	9.43484	8.34324	CSF2RA	-1.18924	0.00152336	0.0215942	7.08858	8.27782
UGCGL2	1.09135	0.000263999	0.00671716	4.33849	3.24714	CCDC49	-1.1887	3.79916e-05	0.00184348	5.97049	7.15919
CYP3A5	1.09093	0.00271747	0.0318501	9.04094	7.95001	RAB9P1	-1.18867	0.000270903	0.00677222	5.18795	6.37662
A1BG	1.08906	0.00104091	0.0165915	6.39	5.30094	RUFY1	-1.18755	0.000233397	0.00617048	10.8339	12.0214
BRWD3	1.08763	0.00295138	0.0334426	6.74873	5.6611	PACRGL	-1.18435	0.00171524	0.0234587	1.29759	2.48194
PDE4C	1.08729	0.00137078	0.0201275	11.0242	9.93692	BAZ1B	-1.18121	0.000259806	0.00664624	6.42757	7.60878
TMEM134	1.08515	8.92933e-07	0.000142214	9.00549	7.92034	MRPS23	-1.17969	0.00436397	0.0433958	5.27382	6.45351
GSTM5	1.08493	0.000840512	0.0144753	4.38663	3.3017	BTBD10	-1.17885	0.00027128	0.00677308	5.7959	6.97475
GFI1B	1.08397	0.0042544	0.0427676	7.09315	6.00918	NRBP1	-1.17875	3.46486e-07	7.82438e-05	7.71354	8.89229
CDK3	1.08366	0.00128867	0.0192397	6.48535	5.40169	PIK3CD	-1.17874	0.00121838	0.0184807	8.78751	9.96626
CHCHD5	1.08174	3.32167e-05	0.00167898	7.80713	6.72539	NDRG3	-1.17863	0.000135831	0.00436895	5.92669	7.10532
MAD1L1	1.07928	0.00068981	0.0126726	8.31504	7.23576	C2CD2	-1.17584	3.36473e-05	0.0016834	2.32431	3.50015
MGC3207	1.07825	0.00187124	0.0246532	5.98346	4.90521	AAMP	-1.17378	1.95752e-05	0.00118586	7.05357	8.22735
HIST1H2AJ	1.0774	7.05446e-05	0.00275557	8.22158	7.14418	PARP9	-1.17314	0.000140501	0.00446701	8.26486	9.438
FKSG43	1.07719	0.00221578	0.0275737	4.01108	2.93389	CALCOCO1	-1.17071	0.00453017	0.0445106	5.61968	6.79039
HCFC1R1	1.07705	1.21788e-05	0.0008469	9.39584	8.3188	DIAPH2	-1.17024	4.60209e-05	0.00211857	4.21654	5.38678
KCNK4	1.07579	0.00237363	0.0290979	4.33332	3.25752	LOC643684	-1.17023	0.00384157	0.0398044	1.084	2.25423
CD320	1.07504	0.000543647	0.0108183	8.37721	7.30217	TMEM43	-1.16993	0.000180567	0.00523718	8.2557	9.42562
MRPL52	1.07379	4.41181e-05	0.00204528	8.44477	7.37098	NID1	-1.16977	0.000491487	0.0100793	1.17806	2.34783
TNNI2	1.07108	0.000620455	0.0118619	8.20912	7.13804	MOV10	-1.16937	0.000380198	0.00847464	5.42104	6.59041
HIST1H2AM	1.0703	4.48012e-05	0.00207208	9.44982	8.37952	PSTPIP2	-1.16802	0.000909165	0.0151264	4.11138	5.2794
APH1A	1.06969	0.00333009	0.0363951	6.1669	5.09721	KIAA1279	-1.16781	0.00400787	0.0411341	4.44318	5.61099
TOMM20	1.06948	0.00287415	0.0328481	8.81419	7.7447	DAPP1	-1.16596	0.00128842	0.0192397	7.94918	9.11515
ATG4D	1.067	0.00443535	0.0438188	4.87159	3.80459	RASA3	-1.16514	0.00167617	0.0231002	3.38048	4.54562
RP11-309M23.2	1.06562	0.0050967	0.0484849	8.85494	7.78932	MTMR12	-1.16374	5.73548e-09	8.09071e-06	4.66902	5.83276
TNFRSF4	1.06442	0.000101129	0.00358565	5.93776	4.87334	PYGM	-1.16286	0.00217722	0.0272347	3.88516	5.04802
LOC100133897	1.06218	0.00447859	0.0441356	6.59799	5.53581	EDC4	-1.16208	0.00106891	0.0169421	4.46385	5.62593
GPC2	1.05798	0.000473716	0.00983746	6.43969	5.38171	FCGR3A	-1.16111	7.02187e-05	0.00275149	15.2482	16.4093
AMAC1L2	1.05605	0.0007517	0.013459	5.88087	4.82482	BIN2	-1.15941	8.08924e-07	0.000134121	9.21587	10.3753
PCSK4	1.05504	0.00292276	0.0331924	4.72037	3.66533	HABP4	-1.15746	0.000932756	0.0153721	4.92499	6.08245
LOC729887	1.05284	0.000239358	0.00625276	5.35115	4.2983	MAP3K8	-1.15742	0.00308772	0.0343545	5.84153	6.99894
SET	1.05102	5.4883e-05	0.0023072	8.04024	6.98923	AXIN2	-1.15476	0.00360377	0.0381409	3.39762	4.55237
MTF2	1.05099	1.63651e-05	0.00103921	7.88857	6.83758	FCGR3B	-1.15361	0.00010484	0.00368413	10.3183	11.4719
JMJD4	1.05046	7.87092e-05	0.00296081	6.11795	5.06749	LOC344382	-1.15234	0.00349876	0.0374487	4.43611	5.58845
TMEM99	1.05021	0.000324314	0.00756036	7.85205	6.80184	CNBP	-1.15154	6.22144e-08	2.92541e-05	8.77083	9.92237
MRPS12	1.04876	0.000431708	0.00925712	10.6597	9.6109	IRF4	-1.14728	0.000563745	0.011056	4.26232	5.4096
TRAPPC5	1.04835	8.88244e-06	0.000677413	11.4788	10.4305	HEXB	-1.14685	7.55607e-06	0.000611577	8.56154	9.70839
FLJ38379	1.04827	0.00455808	0.0446737	5.43934	4.39107	FER	-1.14495	2.03299e-05	0.00121665	1.65372	2.79867
CIB2	1.04774	3.26781e-06	0.00034233	5.65665	4.6089	RDX	-1.14288	0.00276674	0.0322172	3.71991	4.86279
CISD3	1.047	0.000180593	0.00523718	8.95654	7.90954	DEDD2	-1.14158	0.000330301	0.00762937	8.64829	9.78987
DEAF1	1.04666	0.00199826	0.0256946	10.3114	9.26471	GDI1	-1.14155	0.00185488	0.0245359	8.04158	9.18313
PGLS	1.04504	1.79407e-06	0.000218569	9.87128	8.82624	LOC151146	-1.1402	0.000596534	0.0114824	5.10726	6.24746
PARD6A	1.04182	2.72536e-05	0.00149095	5.90444	4.86261	UBE2Q1	-1.13814	3.47358e-07	7.82438e-05	5.61443	6.75257
ADAMTS7	1.04133	0.000222055	0.00599094	13.5707	12.5293	LOC152024	-1.1381	0.00350103	0.0374487	5.55476	6.69286
C16orf59	1.04074	0.00186629	0.0246153	5.29457	4.25382	LOC285957	-1.13454	0.000498679	0.0102056	2.73206	3.8666
GATC	1.04072	5.56409e-07	0.000104081	6.78485	5.74414	CPVL	-1.13395	0.000116183	0.00391552	8.79237	9.92633
LOC441795	1.04063	0.00209832	0.0265639	5.20383	4.1632	JMJD6	-1.13358	0.00119287	0.0182513	5.22306	6.35664
GOLPH3	1.03922	5.79465e-06	0.00052255	8.02988	6.99066	ABCG1	-1.13321	0.000830596	0.0143638	6.38164	7.51485
LOC441150	1.03704	0.000747153	0.0134385	7.21601	6.17898	PHF14	-1.133	0.000237427	0.00623529	5.03824	6.17124
SMARCD1	1.03492	3.47247e-06	0.00035675	8.01053	6.97561	EEF2	-1.12864	3.56281e-05	0.00177234	11.9529	13.0815
COX5A	1.03424	0.000917325	0.015211	9.78079	8.74655	LOC100131419	-1.12849	0.00526692	0.0497449	1.76777	2.89626
APOM	1.03362	6.05413e-07	0.000108694	6.07224	5.03862	DAP	-1.12838	1.64248e-05	0.00103966	6.98259	8.11097
TMEM187	1.03286	0.00065869	0.0123772	7.54189	6.50903	STK40	-1.12775	0.000179669	0.00522576	12.2637	13.3914
PPM1K	1.0324	0.000907518	0.0151264	6.05512	5.02272	DDX42	-1.12621	1.45685e-05	0.00095269	6.28188	7.40809
NCAPH2	1.03182	4.29873e-07	8.81362e-05	8.14854	7.11672	BAP1	-1.12582	0.00229285	0.0283363	6.25356	7.37938
CYP1A2	1.02959	0.000550459	0.010871	8.51682	7.48723	LLPH	-1.12542	0.000141847	0.00448933	6.02477	7.15019
LRFN3	1.02952	0.00182803	0.0243601	6.93541	5.9059	DDX5	-1.12505	0.000618176	0.0118298	12.0738	13.1988
C12orf65	1.02893	8.28972e-05	0.00308312	7.70523	6.6763	PRDX3	-1.12397	8.01887e-05	0.0029922	6.11438	7.23835
LOC388564	1.02795	0.00268252	0.0315904	8.23549	7.20754	LILRA5	-1.12277	0.00450051	0.0443073	6.80038	7.92316
FBXW5	1.02507	2.06453e-05	0.0012219	10.0576	9.03255	RAP1A	-1.12234	8.76223e-06	0.000677268	9.00308	10.1254
C20orf94	1.02471	1.81616e-05	0.00112437	7.06424	6.03953	RAF1	-1.12197	2.59435e-06	0.000288318	8.90545	10.0274
C5orf41	1.02341	0.000121758	0.00402781	10.7222	9.69875	NUP210	-1.1186	7.48135e-06	0.000608792	6.30426	7.42286
LOC100128398	1.02134	0.0011432	0.0177101	4.824	3.80266	FGF16	-1.11727	0.00445437	0.0439407	1.33002	2.44729
MARK4	1.01868	0.00483186	0.0465954	6.57444	5.55576	LRRK1	-1.11672	0.00165928	0.0229959	4.41147	5.52819
COX8A	1.01866	0.000157565	0.00477262	12.392	11.3733	NOD1	-1.11633	0.000287222	0.00697705	4.83569	5.95201
ARMC5	1.01862	0.000105613	0.00369086	7.54098	6.52235	IFT52	-1.11141	0.00172075	0.0234742	2.30223	3.41364
PRELID2	1.01849	0.00159949	0.0223704	5.134	4.11551	ZNF710	-1.10847	0.000273992	0.00682353	8.78178	9.89024
AIRE	1.01691	0.00483201	0.0465954	4.54993	3.53301	MARK3	-1.10663	0.00337262	0.0366369	7.9716	9.07823
JUN	1.0169	0.000843296	0.0145072	7.76095	6.74405	COPS7B	-1.10407	0.00290593	0.0331155	3.11594	4.22001
COX6B1	1.01444	8.51595e-07	0.000138993	12.1058	11.0913	TMEM185B	-1.10251	0.0041281	0.0418725	4.30354	5.40605
RASSF3	1.01436	0.00347799	0.037269	5.22356	4.2092	PARVG	-1.10219	0.000755311	0.0135115	7.71129	8.81348
VPS25	1.01267	4.89411e-06	0.000462458	8.92398	7.91131	CABC1	-1.10167	0.00232215	0.0286268	7.24461	8.34628
ZNF562	1.01196	2.69316e-06	0.000297135	6.77196	5.76	GAB3	-1.10139	4.75456e-05	0.00215902	6.5051	7.6065
CPNE6	1.01087	0.00418393	0.0422868	4.95798	3.9471	LOC100131289	-1.10093	0.00511134	0.0485729	1.54425	2.64518
LOC653314	1.0106	0.00108504	0.0170609	13.8492	12.8386	LOC387924	-1.09707	9.28659e-06	0.000697341	1.34443	2.44151
GPX4	1.00892	5.77077e-07	0.000104557	10.2721	9.26318	CCDC146	-1.09202	0.00133402	0.0196902	6.25108	7.3431
ORMDL2	1.00812	8.49444e-06	0.000668354	9.68956	8.68144	CIDEB	-1.0915	0.000900458	0.0150705	5.88505	6.97655
ARL17P1	1.00811	0.000344104	0.00786541	6.94656	5.93845	CMAS	-1.08915	0.00197153	0.0255484	3.90607	4.99522
PLA2G4D	1.00698	0.00255859	0.0306313	7.21479	6.20782	ECE1	-1.08594	0.000694611	0.0127017	6.39831	7.48425
KRTAP10-10	1.00595	0.00254568	0.0305452	6.87586	5.86992	ATXN3	-1.08542	0.000486121	0.0100004	4.60152	5.68694
MGC70863	1.00532	0.00071846	0.0130293	13.1182	12.1128	FLNB	-1.08351	0.00351387	0.0374705	4.06841	5.15191
ERGIC1	1.00422	0.000364348	0.00818602	10.3127	9.30847	PCSK7	-1.08266	7.82599e-05	0.00296081	6.58856	7.67122
ATF6B	1.00325	0.000584316	0.0113356	5.65877	4.65552	RNH1	-1.08158	8.18135e-06	0.000654144	11.0757	12.1572
						ZNF300	-1.07997	0.00166712	0.0230559	1.65954	2.73951
						CTD-2267G17.3	-1.07993	0.0025953	0.0308206	1.11794	2.19786
						MAP4	-1.07984	0.00204173	0.0260311	4.13131	5.21115
						NCRNA00084	-1.07875	0.00442359	0.0437683	7.15592	8.23467
						PRKCD	-1.07377	0.00203361	0.0259443	9.40755	10.4813
						TRIM25	-1.07294	0.00279896	0.0323457	6.97139	8.04433
						MAP2K1	-1.07244	1.58791e-05	0.0010116	7.46593	8.53837
						ADAM8	-1.07176	0.00117824	0.0180801	13.8777	14.9495
						SNRPB	-1.07068	1.55794e-06	0.000204207	7.7728	8.84348
						LOC100128836	-1.06999	5.1451e-05	0.00221388	8.03665	9.10664
						TMEM140	-1.06926	0.000387366	0.00856013	8.40895	9.47821
						SNAP29	-1.0674	0.00128813	0.0192397	3.8715	4.9389
						IFNGR2	-1.0652	0.00027607	0.00684565	8.50577	9.57098
						NPC1	-1.06424	3.15567e-05	0.00163912	5.17941	6.24364
						RBM34	-1.05903	0.000261666	0.00668519	6.97949	8.03853
						ALDH1A3	-1.05846	0.0017344	0.0236062	1.01975	2.07821
						RNASEH1	-1.058	0.000348806	0.007927	4.57804	5.63604
						CNP	-1.05624	1.48984e-07	4.97296e-05	9.37055	10.4268
						RIC8B	-1.05569	1.9897e-07	6.04531e-05	1.25742	2.31311
						LCP1	-1.05502	0.000284473	0.00694444	13.9474	15.0024
						CD53	-1.05485	6.78187e-08	3.11477e-05	11.061	12.1159
						SNRPN	-1.05384	6.43246e-06	0.000554736	4.68411	5.73795
						PCCB	-1.05354	0.000347651	0.00790986	5.55002	6.60356
						TOR1A	-1.05348	0.00190985	0.0249163	5.97954	7.03303
						WBP5	-1.05268	0.00226454	0.0280743	1.28431	2.33699
						IRF7	-1.05052	2.77337e-05	0.00150885	10.2404	11.2909
						LOC220729	-1.05025	2.40359e-06	0.000272807	7.25516	8.3054
						CPNE2	-1.04737	0.00177484	0.0239585	6.97211	8.01948
						LASP1	-1.04658	0.000222846	0.00599767	9.43551	10.4821
						C11orf45	-1.04641	0.0018344	0.0244121	1.48341	2.52982
						MNDA	-1.04107	0.00180988	0.0242127	13.075	14.1161
						CD74	-1.04104	0.000876784	0.014825	8.32997	9.371
						ATP6V0E1	-1.03901	2.54335e-05	0.00141584	9.62354	10.6625
						USP22	-1.0385	0.00144992	0.0208554	5.16881	6.20731
						LOC400036	-1.03847	0.000469504	0.00978083	6.01429	7.05276
						ZNF608	-1.03712	5.93482e-05	0.00243673	1.24275	2.27987
						ATP1A1	-1.03454	0.000354731	0.00804315	9.13706	10.1716
						CHERP	-1.0339	0.00127454	0.0191268	7.18809	8.22199
						RIN2	-1.03375	0.00174182	0.0236537	4.12987	5.16362
						IFIH1	-1.03347	0.000578887	0.0112746	7.82443	8.8579
						TTC1	-1.03345	1.05163e-06	0.000157897	6.79948	7.83293
						RIT1	-1.02999	0.000173479	0.00512114	7.00329	8.03328
						LOC554234	-1.02922	6.06536e-05	0.00246471	8.45552	9.48474
						PRPF18	-1.02753	0.00456316	0.0446985	7.40368	8.43121
						RGL2	-1.02739	0.000426286	0.00917071	8.94732	9.9747
						BRMS1	-1.02469	0.000298407	0.00716112	7.84406	8.86876
						KLHL32	-1.02467	0.00270643	0.0317584	1.03045	2.05512
						PI4KB	-1.02352	2.23087e-05	0.00128447	7.1793	8.20283
						BXDC2	-1.0217	0.00246436	0.0299684	6.40141	7.42311
						URB2	-1.02132	0.00204687	0.0260797	4.20647	5.2278
						PKN1	-1.02126	0.000281259	0.00690009	6.7363	7.75755
						WBSCR16	-1.01915	0.000168792	0.00502785	4.42109	5.44024
						IFRD1	-1.01842	0.00403861	0.0413471	7.26449	8.28291
						WBP2	-1.01814	0.00491287	0.0471908	6.44041	7.45854
						GLE1	-1.01771	0.000117465	0.00394525	4.0717	5.08941
						WBP4	-1.01723	0.00058795	0.0113615	5.43651	6.45374
						TPRG1L	-1.01588	5.08129e-05	0.00220241	7.59908	8.61497
						DKFZP434I0714	-1.01424	8.87948e-05	0.00324142	1.18012	2.19437
						TMBIM1	-1.01399	0.000601918	0.0115523	7.77519	8.78918
						OSM	-1.01274	0.00525221	0.0496534	6.71506	7.72779
						RBMX2	-1.01242	7.42183e-05	0.002874	6.6425	7.65492
						CLDN14	-1.01231	0.00305009	0.0340896	0.984479	1.99679
						C3orf37	-1.01039	9.0332e-06	0.000683512	6.66519	7.67558
						DHX38	-1.00987	0.00453316	0.0445178	6.44744	7.45732
						BST2	-1.00948	0.000939282	0.0153889	8.84161	9.85109
						DNMT1	-1.00927	0.00313913	0.0347504	5.47937	6.48864
						TMED10P	-1.00821	0.00258888	0.0308206	4.09715	5.10536
						CDIPT	-1.00813	0.000865571	0.0147112	7.1228	8.13093
						PANK4	-1.00742	0.00151924	0.0215852	5.43023	6.43765
						UNG	-1.00604	8.14952e-07	0.000134121	1.54114	2.54718
						FCN1	-1.00595	0.00259368	0.0308206	12.9895	13.9954
						TLR4	-1.00557	0.0017628	0.0238449	7.12268	8.12825
						FLOT1	-1.0048	0.00275309	0.0321531	8.14911	9.15391
