# Supplementary material for: Comprehensive analysis of circRNA expression profiles and circRNA-associated competing endogenous RNA networks in IgA nephropathy
Source: PeerJ. 2020 Dec 3;8:e10395. doi: 10.7717/peerj.10395 (PMC7719294; doi:10.7717/peerj.10395)
Supplement: Supplemental Information 6 [file peerj-08-10395-s006.xlsx]

## Sheet: down.BP_result
ID	Term	Ontology	Count	Size	numInt	numTotal	p_value	fdr	Enrichment_Score	Fold_Enrichment	GeneRatio	Genes
GO:0002366	leukocyte_activation_involved_in_immune_response	Biological Process	55	616	463	17492	2.18343e-15	6.36845e-12	14.6609	3.37319	0.11879	ACTR1B//ADAM8//ALOX5//ASAH1//ATP6V1D//BIN2//BST1//BST2//CAB39//CANT1//CAP1//CD53//CD97//CLEC12A//CORO1A//CPNE1//DOCK2//EEF2//F2RL1//FCGR3B//FCN1//FGL2//GMFG//GRN//HEXB//HLA-H//IGF2R//IRF4//KARS//LCP1//LILRA2//LPCAT1//LYZ//MGAM//MNDA//PGRMC1//PIK3CD//PLAUR//PRKCD//PSAP//PSMC3//PSMD13//PTK2B//RAP1A//SEMA4A//SLC2A3//SNAP23//SNAP29//STAT3//STAT6//TLR4//TMBIM1//TNFRSF1B//TP53//UNG
GO:0002263	cell_activation_involved_in_immune_response	Biological Process	55	620	463	17492	2.88035e-15	6.36845e-12	14.5406	3.35142	0.11879	ACTR1B//ADAM8//ALOX5//ASAH1//ATP6V1D//BIN2//BST1//BST2//CAB39//CANT1//CAP1//CD53//CD97//CLEC12A//CORO1A//CPNE1//DOCK2//EEF2//F2RL1//FCGR3B//FCN1//FGL2//GMFG//GRN//HEXB//HLA-H//IGF2R//IRF4//KARS//LCP1//LILRA2//LPCAT1//LYZ//MGAM//MNDA//PGRMC1//PIK3CD//PLAUR//PRKCD//PSAP//PSMC3//PSMD13//PTK2B//RAP1A//SEMA4A//SLC2A3//SNAP23//SNAP29//STAT3//STAT6//TLR4//TMBIM1//TNFRSF1B//TP53//UNG
GO:0002274	myeloid_leukocyte_activation	Biological Process	52	578	463	17492	9.97097e-15	1.46972e-11	14.0013	3.39887	0.112311	ACTR1B//ADAM8//ALOX5//ASAH1//ATP6V1D//BIN2//BST1//BST2//CAB39//CANT1//CAP1//CD53//CD97//CLEC12A//CPNE1//CRTC3//DOCK2//EEF2//F2RL1//FCGR3B//FCN1//FGL2//GMFG//GRN//HEXB//HLA-H//IGF2R//IL18//IRF4//JMJD6//KARS//LILRA2//LPCAT1//LTBR//LYZ//MGAM//MNDA//NAMPT//PGRMC1//PIK3CD//PLAUR//PRKCD//PSAP//PSMC3//PSMD13//RAP1A//SLC2A3//SNAP23//SNAP29//TLR4//TMBIM1//TNFRSF1B
GO:0045321	leukocyte_activation	Biological Process	64	910	463	17492	7.12286e-13	7.77938e-10	12.1473	2.65703	0.138229	ACTR1B//ADAM8//ALOX5//ASAH1//ATP6V1D//BCL6//BIN2//BST1//BST2//CAB39//CANT1//CAP1//CD53//CD74//CD97//CLEC12A//CORO1A//CPNE1//CRTC3//DNAJA3//DOCK2//EEF2//F2RL1//FCGR3B//FCN1//FGL2//GMFG//GRN//HEXB//HLA-H//IGF2R//IL18//IRF4//JMJD6//KARS//LCP1//LILRA2//LPCAT1//LTBR//LYZ//MGAM//MNDA//NAMPT//PGRMC1//PIK3CD//PLAUR//PRKCD//PSAP//PSMC3//PSMD13//PTK2B//RAP1A//SEMA4A//SLC2A3//SNAP23//SNAP29//SNX27//STAT3//S…
GO:0001775	cell_activation	Biological Process	70	1056	463	17492	8.79622e-13	7.77938e-10	12.0557	2.50434	0.151188	ACTR1B//ADAM8//ALOX5//ASAH1//ATP6V1D//BCL6//BIN2//BST1//BST2//CAB39//CANT1//CAP1//CD53//CD74//CD97//CLEC12A//CORO1A//CPNE1//CRTC3//DNAJA3//DOCK2//EEF2//F2RL1//FCGR3B//FCN1//FERMT3//FGL2//GMFG//GRN//HEXB//HLA-H//IGF2R//IL18//IRF4//ITPR2//JMJD6//KARS//LCP1//LILRA2//LPCAT1//LTBR//LYZ//MGAM//MNDA//NAMPT//PGRMC1//PIK3CB//PIK3CD//PIK3R5//PLAUR//PRKCD//PRMT5//PSAP//PSMC3//PSMD13//PTK2B//RAF1//RAP1A//SEM…
GO:0042119	neutrophil_activation	Biological Process	44	494	463	17492	1.8266e-12	1.34621e-09	11.7384	3.36499	0.0950324	ACTR1B//ADAM8//ALOX5//ASAH1//ATP6V1D//BIN2//BST1//BST2//CAB39//CANT1//CAP1//CD53//CD97//CLEC12A//CPNE1//DOCK2//EEF2//F2RL1//FCGR3B//FCN1//FGL2//GMFG//GRN//HEXB//HLA-H//IGF2R//IL18//LILRA2//LPCAT1//LYZ//MGAM//MNDA//PGRMC1//PLAUR//PRKCD//PSAP//PSMC3//PSMD13//RAP1A//SLC2A3//SNAP23//SNAP29//TMBIM1//TNFRSF1B
GO:0019221	cytokine-mediated_signaling_pathway	Biological Process	52	665	463	17492	2.48928e-12	1.57251e-09	11.6039	2.9542	0.112311	AIM2//ALOX5//BCL6//BST2//CASP1//CD74//CHUK//CRK//CSF2RA//EDAR//FER//FOS//GBP1//HCK//HLA-B//HLA-H//HNRNPA2B1//IFI27//IFIT3//IFNGR2//IL18//IL2RB//IRF4//IRF7//IRF8//KARS//LCP1//LTBR//MAP3K8//NOD1//OAS1//OAS2//OAS3//OSM//PIK3CB//PIK3CD//PRKCD//PSMA3//PSMC3//PSMC5//PSMD13//PTK2B//STAT3//STAT6//STX3//TEC//TNFRSF1B//TNFSF13//TNIP2//TP53//TRIM21//TRIM25
GO:0043299	leukocyte_degranulation	Biological Process	44	501	463	17492	2.94629e-12	1.62856e-09	11.5307	3.31798	0.0950324	ACTR1B//ADAM8//ALOX5//ASAH1//ATP6V1D//BIN2//BST1//BST2//CAB39//CANT1//CAP1//CD53//CD97//CLEC12A//CORO1A//CPNE1//DOCK2//EEF2//FCGR3B//FCN1//FGL2//GMFG//GRN//HCK//HEXB//HLA-H//IGF2R//LPCAT1//LYZ//MGAM//MNDA//PGRMC1//PIK3CD//PLAUR//PRKCD//PSAP//PSMC3//PSMD13//RAP1A//SLC2A3//SNAP23//SNAP29//TMBIM1//TNFRSF1B
GO:0002283	neutrophil_activation_involved_in_immune_response	Biological Process	42	485	463	17492	1.49106e-11	7.32606e-09	10.8265	3.27164	0.0907127	ACTR1B//ADAM8//ALOX5//ASAH1//ATP6V1D//BIN2//BST1//BST2//CAB39//CANT1//CAP1//CD53//CD97//CLEC12A//CPNE1//DOCK2//EEF2//FCGR3B//FCN1//FGL2//GMFG//GRN//HEXB//HLA-H//IGF2R//LILRA2//LPCAT1//LYZ//MGAM//MNDA//PGRMC1//PLAUR//PRKCD//PSAP//PSMC3//PSMD13//RAP1A//SLC2A3//SNAP23//SNAP29//TMBIM1//TNFRSF1B
GO:0043312	neutrophil_degranulation	Biological Process	41	481	463	17492	4.32857e-11	1.9141e-08	10.3637	3.22031	0.0885529	ACTR1B//ADAM8//ALOX5//ASAH1//ATP6V1D//BIN2//BST1//BST2//CAB39//CANT1//CAP1//CD53//CD97//CLEC12A//CPNE1//DOCK2//EEF2//FCGR3B//FCN1//FGL2//GMFG//GRN//HEXB//HLA-H//IGF2R//LPCAT1//LYZ//MGAM//MNDA//PGRMC1//PLAUR//PRKCD//PSAP//PSMC3//PSMD13//RAP1A//SLC2A3//SNAP23//SNAP29//TMBIM1//TNFRSF1B
GO:0006955	immune_response	Biological Process	96	1850	463	17492	5.84776e-11	2.3508e-08	10.233	1.96046	0.207343	ACTR1B//ADAM8//AIM2//ALOX5//APOBEC3B//ARHGEF2//ASAH1//ATP6V1D//BCL6//BIN2//BST1//BST2//CAB39//CANT1//CAP1//CASP1//CD53//CD74//CD97//CHUK//CLEC12A//CORO1A//CPNE1//CSK//DOCK2//EEF2//ENPP2//F2RL1//FCGR3A//FCGR3B//FCN1//FGL2//FLNB//GBP1//GMFG//GRN//HCK//HEXB//HLA-B//HLA-H//IFI27//IFIH1//IFIT3//IFNGR2//IGF2R//IL18//IRF4//IRF7//IRF8//KARS//LCP1//LILRA2//LILRA5//LPCAT1//LTBR//LYZ//MCOLN1//MGAM//MNDA//NC…
GO:0002446	neutrophil_mediated_immunity	Biological Process	41	491	463	17492	8.18822e-11	3.01736e-08	10.0868	3.15472	0.0885529	ACTR1B//ADAM8//ALOX5//ASAH1//ATP6V1D//BIN2//BST1//BST2//CAB39//CANT1//CAP1//CD53//CD97//CLEC12A//CPNE1//DOCK2//EEF2//FCGR3B//FCN1//FGL2//GMFG//GRN//HEXB//HLA-H//IGF2R//LPCAT1//LYZ//MGAM//MNDA//PGRMC1//PLAUR//PRKCD//PSAP//PSMC3//PSMD13//RAP1A//SLC2A3//SNAP23//SNAP29//TMBIM1//TNFRSF1B
GO:0071345	cellular_response_to_cytokine_stimulus	Biological Process	62	996	463	17492	2.76857e-10	9.41739e-08	9.55775	2.35175	0.133909	AIM2//ALOX5//ARHGEF2//ASAH1//BCL6//BST2//CASP1//CD74//CHUK//CORO1A//CRK//CSF2RA//EDAR//FER//FLNB//FOS//GBP1//GFPT2//HCK//HLA-B//HLA-H//HNRNPA2B1//IFI27//IFIT3//IFNGR2//IL18//IL2RB//IRF4//IRF7//IRF8//KARS//KLF4//LCP1//LTBR//MAP3K8//MNDA//NOD1//OAS1//OAS2//OAS3//OSM//PIK3CB//PIK3CD//PRKCD//PSMA3//PSMC3//PSMC5//PSMD13//PTK2B//RAB20//STAT3//STAT6//STIP1//STX3//TEC//TLR4//TNFRSF1B//TNFSF13//TNIP2//TP5…
GO:0045055	regulated_exocytosis	Biological Process	49	691	463	17492	3.43582e-10	1.08523e-07	9.46397	2.67902	0.105832	ACTR1B//ADAM8//ALOX5//ASAH1//ATP6V1D//BIN2//BST1//BST2//CAB39//CANT1//CAP1//CD53//CD97//CLEC12A//CORO1A//CPNE1//DOCK2//EEF2//FCGR3B//FCN1//FERMT3//FGL2//GMFG//GRN//HABP4//HCK//HEXB//HLA-H//IGF2R//LPCAT1//LYZ//MGAM//MNDA//PGRMC1//PIK3CD//PLAUR//PRKCD//PSAP//PSMC3//PSMD13//RAP1A//SDF4//SLC2A3//SNAP23//SNAP29//STX11//STX3//TMBIM1//TNFRSF1B
GO:0060333	interferon-gamma-mediated_signaling_pathway	Biological Process	15	72	463	17492	5.07699e-10	1.4967e-07	9.29439	7.87077	0.0323974	GBP1//HCK//HLA-B//HLA-H//IFNGR2//IRF4//IRF7//IRF8//OAS1//OAS2//OAS3//PRKCD//TP53//TRIM21//TRIM25
GO:0071310	cellular_response_to_organic_substance	Biological Process	110	2362	463	17492	1.09623e-09	3.02971e-07	8.9601	1.75943	0.237581	AIM2//ALOX5//ANKZF1//ARHGEF2//ASAH1//ATP1A1//ATP1A3//ATP6V0E1//ATP6V1D//ATP6V1E1//ATXN3//BCL6//BST2//CALCOCO1//CARD16//CARD17//CASP1//CBX3//CD74//CHUK//CORO1A//CRK//CSF2RA//CSK//DAG1//DDX5//DNAJA1//DNMT1//EDAR//EEF2//EIF2S1//ELK1//EXTL2//FER//FGF16//FLNB//FLOT1//FOS//GBP1//GFPT2//GNAI2//GRAMD1A//HCFC1//HCK//HLA-B//HLA-H//HNRNPA2B1//IFI27//IFIH1//IFIT3//IFNGR2//IL18//IL2RB//IRF4//IRF7//IRF8//ITPR2…
GO:0010033	response_to_organic_substance	Biological Process	130	2973	463	17492	1.18173e-09	3.0739e-07	8.92748	1.65199	0.280778	ABCG1//ADM//AIM2//ALOX5//ANKZF1//ARHGEF2//ARPC1B//ASAH1//ATP1A1//ATP1A3//ATP6V0E1//ATP6V1D//ATP6V1E1//ATXN3//BCL6//BST2//CALCOCO1//CARD16//CARD17//CASP1//CBX3//CD74//CHUK//CLK2//CNP//CORO1A//CPOX//CRK//CSF2RA//CSK//DAG1//DDX5//DNAJA1//DNAJB4//DNMT1//EDAR//EEF2//EIF2S1//ELK1//EPHX1//EXTL2//FER//FGF16//FLNB//FLOT1//FOS//GBP1//GFPT2//GNAI2//GRAMD1A//GRIN3A//HCFC1//HCK//HLA-B//HLA-H//HNRNPA2B1//HPCA/…
GO:0006887	exocytosis	Biological Process	50	779	463	17492	6.48092e-09	1.59215e-06	8.18836	2.42488	0.107991	ACTR1B//ADAM8//ALOX5//ASAH1//ATP6V1D//BIN2//BST1//BST2//CAB39//CANT1//CAP1//CD53//CD97//CLEC12A//CORO1A//CPNE1//DOCK2//EEF2//FCGR3B//FCN1//FERMT3//FGL2//GMFG//GRN//HABP4//HCK//HEXB//HLA-H//IGF2R//LPCAT1//LYZ//MGAM//MNDA//PAK1//PGRMC1//PIK3CD//PLAUR//PRKCD//PSAP//PSMC3//PSMD13//RAP1A//SDF4//SLC2A3//SNAP23//SNAP29//STX11//STX3//TMBIM1//TNFRSF1B
GO:0034097	response_to_cytokine	Biological Process	62	1084	463	17492	7.48167e-09	1.74126e-06	8.126	2.16083	0.133909	AIM2//ALOX5//ARHGEF2//ASAH1//BCL6//BST2//CASP1//CD74//CHUK//CORO1A//CRK//CSF2RA//EDAR//FER//FLNB//FOS//GBP1//GFPT2//HCK//HLA-B//HLA-H//HNRNPA2B1//IFI27//IFIT3//IFNGR2//IL18//IL2RB//IRF4//IRF7//IRF8//KARS//KLF4//LCP1//LTBR//MAP3K8//MNDA//NOD1//OAS1//OAS2//OAS3//OSM//PIK3CB//PIK3CD//PRKCD//PSMA3//PSMC3//PSMC5//PSMD13//PTK2B//RAB20//STAT3//STAT6//STIP1//STX3//TEC//TLR4//TNFRSF1B//TNFSF13//TNIP2//TP5…
GO:0032940	secretion_by_cell	Biological Process	58	989	463	17492	9.93952e-09	2.19763e-06	8.00263	2.21559	0.12527	ACTR1B//ADAM8//ADM//AIM2//ALOX5//ASAH1//ATP6V1D//BIN2//BST1//BST2//CAB39//CANT1//CAP1//CD53//CD97//CLEC12A//CORO1A//CPNE1//CTAGE1//DOCK2//EEF2//F2RL1//FCGR3B//FCN1//FERMT3//FGL2//GMFG//GRN//HABP4//HCK//HEXB//HLA-H//IGF2R//LPCAT1//LYZ//MGAM//MNDA//NOTCH1//PAK1//PGRMC1//PIK3CD//PLAUR//PRKCD//PSAP//PSMC3//PSMD13//RAF1//RAP1A//SDF4//SLC2A3//SNAP23//SNAP29//STX11//STX3//TLR4//TMBIM1//TNFRSF1B//UBE2Q1
GO:0051247	positive_regulation_of_protein_metabolic_process	Biological Process	84	1697	463	17492	1.13349e-08	2.38681e-06	7.94558	1.87006	0.181425	ABCG1//ADAM8//AIM2//AKTIP//ARAF//ARHGEF2//ATXN3//AXIN2//BCL6//BRMS1//CAB39//CAMK1//CASP1//CD74//CIDEB//CNBP//CRK//CSK//DAG1//DAP//DHX29//DNMT1//EDAR//EEF2//ENPP2//F2RL1//FLOT1//GADD45A//GLMN//GNAI2//GORASP1//GRN//HABP4//HDAC3//HSPE1//IL18//IRF4//KARS//KLF4//LGMN//LILRA5//LPAR1//LPCAT1//LRRK1//LTBR//MAP2K1//MAP3K8//MAPK9//MAPKAP1//MSTN//NEDD9//NGRN//NOD1//NOTCH1//OSM//PAK1//PARP9//PDE8A//PIK3CB//P…
GO:0032270	positive_regulation_of_cellular_protein_metabolic_process	Biological Process	80	1592	463	17492	1.41027e-08	2.83463e-06	7.8507	1.89848	0.172786	ADAM8//AIM2//AKTIP//ARAF//ARHGEF2//ATXN3//AXIN2//BCL6//BRMS1//CAB39//CAMK1//CASP1//CD74//CIDEB//CNBP//CRK//CSK//DAG1//DAP//DHX29//DNMT1//EDAR//EEF2//ENPP2//F2RL1//FLOT1//GADD45A//GNAI2//GORASP1//GRN//HABP4//HDAC3//HSPE1//IL18//KARS//KLF4//LGMN//LILRA5//LPAR1//LRRK1//LTBR//MAP2K1//MAP3K8//MAPK9//MAPKAP1//MSTN//NEDD9//NGRN//NOD1//NOTCH1//OSM//PAK1//PARP9//PDE8A//PIK3CB//PIK3R5//PKN1//PLAUR//PPP1R15…
GO:0002443	leukocyte_mediated_immunity	Biological Process	47	756	463	17492	5.04317e-08	9.69605e-06	7.2973	2.34874	0.101512	ACTR1B//ADAM8//ALOX5//ASAH1//ATP6V1D//BIN2//BST1//BST2//CAB39//CANT1//CAP1//CD53//CD74//CD97//CLEC12A//CORO1A//CPNE1//DOCK2//EEF2//FCGR3B//FCN1//FGL2//GMFG//GRN//HEXB//HLA-H//IGF2R//IL18//IRF7//LPCAT1//LYZ//MGAM//MNDA//PGRMC1//PIK3CD//PLAUR//PRKCD//PSAP//PSMC3//PSMD13//RAP1A//SLC2A3//SNAP23//SNAP29//TMBIM1//TNFRSF1B//UNG
GO:0071346	cellular_response_to_interferon-gamma	Biological Process	19	163	463	17492	6.60422e-08	1.21683e-05	7.18018	4.40377	0.0410367	CASP1//FLNB//GBP1//HCK//HLA-B//HLA-H//IFNGR2//IRF4//IRF7//IRF8//OAS1//OAS2//OAS3//PRKCD//RAB20//TLR4//TP53//TRIM21//TRIM25
GO:0034341	response_to_interferon-gamma	Biological Process	20	184	463	17492	9.64224e-08	1.70552e-05	7.01582	4.10649	0.0431965	BST2//CASP1//FLNB//GBP1//HCK//HLA-B//HLA-H//IFNGR2//IRF4//IRF7//IRF8//OAS1//OAS2//OAS3//PRKCD//RAB20//TLR4//TP53//TRIM21//TRIM25
GO:1902531	regulation_of_intracellular_signal_transduction	Biological Process	84	1810	463	17492	1.97998e-07	3.36749e-05	6.70334	1.75331	0.181425	ADAM8//ARAF//ARHGAP15//ARHGAP30//ARHGEF2//BCL6//BST1//BST2//CANT1//CARD16//CASP1//CD74//CHD4//CHERP//CHUK//CPNE1//CRK//CRTC3//CSK//DAG1//DDX5//DNA2//DNAJA1//EDAR//F2RL1//FGF16//FLOT1//GADD45A//GBP1//GDI1//GNAI2//HDAC3//HOMER3//IL18//IQSEC1//KARS//KLF4//LILRA5//LPAR1//LRRK1//LTBR//MAP2K1//MAP3K8//MAPKAP1//MARK3//MSTN//NOD1//NOTCH1//OSM//PAK1//PDE8A//PIK3CB//PIK3CD//PIK3R5//PKN1//PLAUR//PRKAB1//PRK…
GO:0043085	positive_regulation_of_catalytic_activity	Biological Process	70	1431	463	17492	3.67976e-07	6.02664e-05	6.43418	1.84806	0.151188	ADAM8//AHSA1//AIM2//ARFGAP2//ARHGAP15//ARHGAP30//CAB39//CAMK1//CASP1//CD74//CIDEB//CRK//CSK//CYB5B//DAG1//DAP//DNAJA1//DNAJB4//DOCK2//DOCK9//F2RL1//GADD45A//GDI1//GMFG//GNAI2//GORASP1//GRN//HNRNPA2B1//HPCA//HSPE1//IL18//IQSEC1//KARS//KLF4//LGMN//LILRA5//LPAR1//MAP2K1//MAP3K8//MAPKAP1//MID1IP1//NCF4//NEDD9//NOD1//PAK1//PIK3CB//PIK3R5//PKN1//PKP4//PPP1R15A//PRKAG1//PRKCD//PSAP//PTK2B//RAF1//RANGAP1…
GO:0007166	cell_surface_receptor_signaling_pathway	Biological Process	103	2417	463	17492	4.13243e-07	6.52629e-05	6.38379	1.60997	0.222462	AIM2//ALOX5//AP2M1//ARPC1B//ATP6V0E1//ATP6V1D//ATP6V1E1//AXIN2//BCL6//BST2//CALCOCO1//CASP1//CD74//CD97//CHRNA2//CHUK//CORO1A//CRK//CSF2RA//CSK//DDX5//DEDD2//EDAR//FCGR3A//FCN1//FER//FERMT3//FGF16//FOS//GBP1//GNAI2//GRIN3A//GRM8//HCK//HLA-B//HLA-H//HNRNPA2B1//HOMER3//IFI27//IFIT3//IFNGR2//IFT52//IGF2R//IL18//IL2RB//IRF4//IRF7//IRF8//JMJD6//KARS//KLF4//LCP1//LILRA2//LTBR//MAP3K8//MAPK9//MNDA//MOAP…
GO:0046903	secretion	Biological Process	58	1105	463	17492	4.48586e-07	6.84016e-05	6.34815	1.98301	0.12527	ACTR1B//ADAM8//ADM//AIM2//ALOX5//ASAH1//ATP6V1D//BIN2//BST1//BST2//CAB39//CANT1//CAP1//CD53//CD97//CLEC12A//CORO1A//CPNE1//CTAGE1//DOCK2//EEF2//F2RL1//FCGR3B//FCN1//FERMT3//FGL2//GMFG//GRN//HABP4//HCK//HEXB//HLA-H//IGF2R//LPCAT1//LYZ//MGAM//MNDA//NOTCH1//PAK1//PGRMC1//PIK3CD//PLAUR//PRKCD//PSAP//PSMC3//PSMD13//RAF1//RAP1A//SDF4//SLC2A3//SNAP23//SNAP29//STX11//STX3//TLR4//TMBIM1//TNFRSF1B//UBE2Q1
GO:0032268	regulation_of_cellular_protein_metabolic_process	Biological Process	110	2643	463	17492	4.82484e-07	7.11181e-05	6.31652	1.57237	0.237581	ADAM8//AIM2//AKTIP//ARAF//ARHGEF2//ATXN3//AXIN2//BCL6//BRMS1//BST1//BST2//CAB39//CAMK1//CAMK2N2//CARD16//CARD17//CASP1//CD74//CIDEB//CNBP//CRK//CSK//DAG1//DAP//DHX29//DNAJA1//DNMT1//EDAR//EEF2//EIF2S1//ENPP2//F2RL1//FEM1A//FER//FGF16//FLOT1//GADD45A//GBP1//GLE1//GLMN//GMFG//GNAI2//GORASP1//GRN//GSPT1//HABP4//HDAC3//HSPE1//IL18//IWS1//KARS//KLF4//LGMN//LILRA5//LPAR1//LRRK1//LTBR//MAP2K1//MAP3K8//M…
GO:0031401	positive_regulation_of_protein_modification_process	Biological Process	62	1220	463	17492	5.23812e-07	7.47192e-05	6.28082	1.91995	0.133909	ADAM8//AKTIP//ARAF//ARHGEF2//AXIN2//BCL6//BRMS1//CAB39//CAMK1//CD74//CRK//CSK//DAG1//DNMT1//EDAR//ENPP2//F2RL1//FLOT1//GADD45A//GNAI2//GORASP1//HDAC3//IL18//KARS//LILRA5//LPAR1//LRRK1//LTBR//MAP2K1//MAP3K8//MAPK9//MAPKAP1//MSTN//NEDD9//NOD1//NOTCH1//OSM//PAK1//PARP9//PDE8A//PIK3CB//PIK3R5//PKN1//PLAUR//PPP1R15A//PRKAG1//PRKCD//PSAP//PTBP1//PTK2B//RAF1//RAP1A//RASSF2//RNF20//SEMA4D//SMARCB1//STAT3…
GO:0051246	regulation_of_protein_metabolic_process	Biological Process	115	2808	463	17492	5.5298e-07	7.6415e-05	6.25729	1.54725	0.24838	ABCG1//ADAM8//AIM2//AKTIP//ARAF//ARHGEF2//ATXN3//AXIN2//BCL6//BRMS1//BST1//BST2//CAB39//CAMK1//CAMK2N2//CARD16//CARD17//CASP1//CD74//CIDEB//CNBP//CRK//CSK//DAG1//DAP//DHX29//DNAJA1//DNMT1//EDAR//EEF2//EIF2S1//ENPP2//F2RL1//FEM1A//FER//FGF16//FLOT1//GADD45A//GBP1//GLE1//GLMN//GMFG//GNAI2//GORASP1//GRN//GSPT1//HABP4//HDAC3//HSPE1//IFT52//IL18//IRF4//IWS1//KARS//KLF4//LGMN//LILRA5//LPAR1//LPCAT1//LR…
GO:0045088	regulation_of_innate_immune_response	Biological Process	31	449	463	17492	1.22346e-06	0.000163944	5.91241	2.6084	0.0669546	ADAM8//AIM2//CHUK//CRK//F2RL1//FCN1//FLOT1//GRN//HCK//IFIH1//IFNGR2//IRF4//IRF7//LGMN//LILRA2//MNDA//NOD1//PAK1//PARP9//PRKCD//PSMA3//PSMC3//PSMC5//PSMD13//PVR//RAF1//SUMO1//TLR10//TLR4//TNIP2//TRAFD1
GO:0060337	type_I_interferon_signaling_pathway	Biological Process	11	67	463	17492	1.34017e-06	0.00016932	5.87284	6.20264	0.0237581	BST2//HLA-B//HLA-H//IFI27//IFIT3//IRF4//IRF7//IRF8//OAS1//OAS2//OAS3
GO:0071357	cellular_response_to_type_I_interferon	Biological Process	11	67	463	17492	1.34017e-06	0.00016932	5.87284	6.20264	0.0237581	BST2//HLA-B//HLA-H//IFI27//IFIT3//IRF4//IRF7//IRF8//OAS1//OAS2//OAS3
GO:0042325	regulation_of_phosphorylation	Biological Process	73	1582	463	17492	1.79649e-06	0.000220669	5.74557	1.74331	0.157667	ADAM8//AKTIP//ARAF//ARHGEF2//AXIN2//BST1//BTBD10//CAB39//CAMK1//CAMK2N2//CD74//CRK//CSK//DAG1//DNAJA1//EDAR//ENPP2//F2RL1//FER//FGF16//FLOT1//GADD45A//GBP1//GLMN//GMFG//GNAI2//HDAC3//IL18//KARS//KLF4//LILRA5//LPAR1//LRRK1//LTBR//MAP2K1//MAP3K8//MAPKAP1//MSTN//NEDD9//NOD1//NOTCH1//NRBF2//NUP210//NUP93//OSM//PAK1//PARP9//PDE8A//PIK3CB//PIK3R5//PKIG//PKN1//PLAUR//PLXNB2//PRDX3//PRKAG1//PRKCD//PRMT5/…
GO:0034340	response_to_type_I_interferon	Biological Process	11	72	463	17492	2.7983e-06	0.000334435	5.55311	5.7719	0.0237581	BST2//HLA-B//HLA-H//IFI27//IFIT3//IRF4//IRF7//IRF8//OAS1//OAS2//OAS3
GO:0001932	regulation_of_protein_phosphorylation	Biological Process	67	1433	463	17492	3.27773e-06	0.000381424	5.48443	1.76639	0.144708	ADAM8//AKTIP//ARAF//ARHGEF2//AXIN2//BST1//CAB39//CAMK1//CAMK2N2//CD74//CRK//CSK//DAG1//DNAJA1//EDAR//ENPP2//F2RL1//FER//FGF16//FLOT1//GADD45A//GBP1//GMFG//GNAI2//HDAC3//IL18//KARS//KLF4//LILRA5//LPAR1//LRRK1//LTBR//MAP2K1//MAP3K8//MAPKAP1//MSTN//NEDD9//NOD1//NOTCH1//OSM//PAK1//PARP9//PDE8A//PIK3CB//PIK3R5//PKIG//PKN1//PLAUR//PLXNB2//PRKAG1//PRKCD//PRMT5//PSAP//PTK2B//QARS//RAF1//RAP1A//RASSF2//RG…
GO:0051223	regulation_of_protein_transport	Biological Process	40	695	463	17492	3.60287e-06	0.00040851	5.44335	2.17437	0.0863931	ABCG1//ADAM8//AIM2//BAP1//CAMK1//CARD16//CARD17//CASP1//CHUK//CSK//DNAJA1//F2RL1//FCN1//GBP1//GDI1//GLMN//HDAC3//HMGN3//HPCA//IFI27//IFIH1//ITPR2//IWS1//KARS//LCP1//LILRA2//LILRA5//NADK//OSM//PAK1//PKIG//PRKCD//RANGAP1//RAP1A//SEC16A//TLR10//TLR4//TNFRSF1B//TP53//UBR5
GO:0045089	positive_regulation_of_innate_immune_response	Biological Process	25	338	463	17492	4.01671e-06	0.000444047	5.39613	2.79436	0.0539957	ADAM8//AIM2//CHUK//F2RL1//FCN1//FLOT1//HCK//IFIH1//IRF7//LGMN//LILRA2//MNDA//NOD1//PAK1//PARP9//PRKCD//PSMA3//PSMC3//PSMC5//PSMD13//PVR//RAF1//TLR10//TLR4//TNIP2
GO:0007165	signal_transduction	Biological Process	177	5010	463	17492	4.16446e-06	0.000449152	5.38044	1.33473	0.382289	ADM//AIM2//ALOX5//AP2M1//ARAF//ARHGAP15//ARHGAP30//ARHGEF2//ARPC1B//ATP6V0E1//ATP6V1D//ATP6V1E1//AXIN2//BCL6//BST1//BST2//CAB39//CALCOCO1//CAMK1//CAP1//CASP1//CD53//CD74//CD97//CHRNA2//CHUK//CIDEB//CORO1A//CRK//CSF2RA//CSK//DAP//DAPP1//DDX5//DEDD2//DNAJA1//DNAJA3//DNMT1//DOCK2//DOCK9//EDAR//EIF2S1//EXTL2//F2RL1//FAM120B//FCGR3A//FCN1//FER//FERMT3//FGF16//FLNB//FLOT1//FOS//GADD45A//GBP1//GDI1//GMF…
GO:0010941	regulation_of_cell_death	Biological Process	75	1683	463	17492	4.57125e-06	0.000481287	5.33997	1.68359	0.161987	ADAM8//ADM//ALDH1A3//API5//ARAF//ARHGEF2//ASAH1//AXIN2//BCL6//BRMS1//BTBD10//CARD16//CARD17//CASP1//CBX4//CD74//CFDP1//CIDEB//CORO1A//DAP//DDX42//DEDD2//DNAJA1//DNAJA3//DNMT1//EIF2S1//ELK1//FOS//GADD45A//GNAI2//GRN//HCK//HDAC3//HSPE1//IFIT3//IGF2R//IL2RB//IRF7//KLF4//LGMN//LPAR1//LTBR//MAPK9//MNDA//MOAP1//MSTN//NOD1//NOTCH1//NPC1//PDE8A//PIK3CB//PIK3CD//PLAUR//PRDX3//PRKCD//PSAP//PSMC5//PTK2B//PT…
GO:0042327	positive_regulation_of_phosphorylation	Biological Process	53	1051	463	17492	4.77527e-06	0.000491076	5.321	1.90516	0.114471	ADAM8//AKTIP//ARAF//ARHGEF2//AXIN2//BTBD10//CAB39//CAMK1//CD74//CRK//CSK//DAG1//EDAR//ENPP2//F2RL1//FLOT1//GADD45A//GLMN//GNAI2//HDAC3//IL18//KARS//LILRA5//LPAR1//LRRK1//LTBR//MAP2K1//MAP3K8//MAPKAP1//MSTN//NEDD9//NOD1//NOTCH1//OSM//PAK1//PARP9//PDE8A//PIK3CB//PIK3R5//PKN1//PLAUR//PRKAG1//PRKCD//PSAP//PTK2B//RAF1//RAP1A//RASSF2//SEMA4D//STAT3//TEC//TLR4//TP53
GO:0051174	regulation_of_phosphorus_metabolic_process	Biological Process	78	1778	463	17492	5.09527e-06	0.000512074	5.29283	1.65738	0.168467	ADAM8//AKTIP//ARAF//ARHGEF2//AXIN2//BST1//BTBD10//CAB39//CAMK1//CAMK2N2//CD74//CRK//CSK//DAG1//DNAJA1//EDAR//ENPP2//F2RL1//FER//FGF16//FLOT1//GADD45A//GBP1//GLMN//GMFG//GNAI2//HDAC3//HPCA//IL18//KARS//KLF4//LILRA5//LPAR1//LPCAT1//LRRK1//LTBR//MAP2K1//MAP3K8//MAPKAP1//MSTN//NEDD9//NOD1//NOTCH1//NRBF2//NUP210//NUP93//OSM//PAK1//PARP9//PDE8A//PIK3CB//PIK3R5//PKIG//PKN1//PLAUR//PLXNB2//PPP1R15A//PPP4…
GO:0001934	positive_regulation_of_protein_phosphorylation	Biological Process	51	1000	463	17492	5.35125e-06	0.00052585	5.27154	1.92676	0.110151	ADAM8//AKTIP//ARAF//ARHGEF2//AXIN2//CAB39//CAMK1//CD74//CRK//CSK//DAG1//EDAR//ENPP2//F2RL1//FLOT1//GADD45A//GNAI2//HDAC3//IL18//KARS//LILRA5//LPAR1//LRRK1//LTBR//MAP2K1//MAP3K8//MAPKAP1//MSTN//NEDD9//NOD1//NOTCH1//OSM//PAK1//PARP9//PDE8A//PIK3CB//PIK3R5//PKN1//PLAUR//PRKAG1//PRKCD//PSAP//PTK2B//RAF1//RAP1A//RASSF2//SEMA4D//STAT3//TEC//TLR4//TP53
GO:0050776	regulation_of_immune_response	Biological Process	56	1140	463	17492	5.51252e-06	0.000529921	5.25865	1.85584	0.12095	ADAM8//AIM2//ARPC1B//BCL6//BST2//CD300C//CD74//CHUK//CRK//CSK//F2RL1//FCGR3A//FCN1//FER//FGL2//FLOT1//FOS//GBP1//GRN//HCK//HLA-B//HLA-H//IFIH1//IFNGR2//IL18//IRF4//IRF7//KARS//LGMN//LILRA2//MAPK9//MNDA//NOD1//PAK1//PARP9//PIK3CB//PIK3CD//PKN1//PRKCD//PSMA3//PSMC3//PSMC5//PSMD13//PVR//RAF1//RAP1A//STAT6//SUMO1//TEC//THOC1//TLR10//TLR4//TNFRSF1B//TNFSF13//TNIP2//TRAFD1
GO:0006810	transport	Biological Process	161	4489	463	17492	6.45708e-06	0.000607515	5.18996	1.35499	0.347732	ABCB1//ABCG1//ACTR1B//ADAM8//ADM//AFG3L2//AIM2//AKTIP//ALOX5//ANP32C//AP2M1//ARFGAP2//ARHGEF2//ARPC1B//ASAH1//ATP1A1//ATP1A3//ATP6V0E1//ATP6V1D//ATP6V1E1//BIN2//BST1//BST2//CAB39//CAMK1//CANT1//CAP1//CD53//CD74//CD97//CETN3//CHERP//CHRNA2//CLEC12A//CNP//CORO1A//CPNE1//CPSF1//CRK//CROT//CTAGE1//CUTC//DCTN5//DHX38//DNAJA1//DOCK2//DYNC2LI1//EEF2//EIF2S1//ENPP2//F2RL1//FCGR3A//FCGR3B//FCN1//FERMT3//F…
GO:0043408	regulation_of_MAPK_cascade	Biological Process	41	745	463	17492	8.06109e-06	0.000741006	5.09361	2.07915	0.0885529	ADAM8//CD74//CRK//CSK//DAG1//DNAJA1//EDAR//F2RL1//FGF16//GADD45A//GBP1//GNAI2//HDAC3//KARS//KLF4//LILRA5//LPAR1//LTBR//MAP2K1//MAP3K8//MSTN//NOD1//NOTCH1//OSM//PAK1//PDE8A//PIK3CB//PIK3R5//PKN1//PRKCD//PRMT5//PSAP//PTK2B//QARS//RAF1//RAP1A//RASSF2//RGS2//STK38//STK40//TLR4
GO:0007154	cell_communication	Biological Process	188	5449	463	17492	8.21106e-06	0.000741006	5.0856	1.30347	0.406048	ADM//AIM2//ALOX5//AP2M1//ARAF//ARHGAP15//ARHGAP30//ARHGEF2//ARPC1B//ATP1A1//ATP1A3//ATP6V0E1//ATP6V1D//ATP6V1E1//ATXN3//AXIN2//BCL6//BST1//BST2//CAB39//CALCOCO1//CAMK1//CAP1//CASP1//CD53//CD74//CD97//CHRNA2//CHUK//CIDEB//CNP//CORO1A//CRK//CSF2RA//CSK//DAG1//DAP//DAPP1//DDX5//DEDD2//DNAJA1//DNAJA3//DNMT1//DOCK2//DOCK9//EDAR//EIF2S1//EXTL2//F2RL1//FAM120B//FCGR3A//FCN1//FER//FERMT3//FGF16//FLNB//FL…
GO:0016192	vesicle-mediated_transport	Biological Process	82	1930	463	17492	9.39318e-06	0.000830733	5.02719	1.60515	0.177106	ACTR1B//ADAM8//ADM//AKTIP//ALOX5//AP2M1//ARFGAP2//ARPC1B//ASAH1//ATP6V1D//BIN2//BST1//BST2//CAB39//CANT1//CAP1//CD53//CD97//CLEC12A//CORO1A//CPNE1//CRK//CTAGE1//DCTN5//DOCK2//EEF2//ENPP2//FCGR3A//FCGR3B//FCN1//FERMT3//FGL2//GDI1//GMFG//GORASP1//GRN//HABP4//HCK//HEXB//HLA-H//IGF2R//IRF8//JMJD6//LPCAT1//LYZ//MGAM//MNDA//MYO1E//NCF4//NLGN3//NLGN4Y//NPC1//NRBP1//PACSIN2//PAK1//PGRMC1//PI4KB//PIK3CB//…
GO:0035556	intracellular_signal_transduction	Biological Process	73	1669	463	17492	1.19727e-05	0.00103811	4.92181	1.65244	0.157667	ADM//ARAF//ARHGAP30//ARHGEF2//BCL6//CAB39//CD97//CHUK//CIDEB//CSF2RA//DDX5//DEDD2//DNAJA3//DNMT1//DOCK2//DOCK9//FER//FGF16//FLOT1//GADD45A//GDI1//GNAI2//GUCY1B2//HPCA//IFIH1//IL18//IL2RB//IRF7//ITPR2//KARS//KBTBD2//LCP1//MAP2K1//MAP3K8//MAPK9//MAPKAP1//MARK3//MAST3//MCOLN1//MOAP1//NOD1//NRBP1//PAK1//PI4KA//PI4KB//PIK3CB//PIK3CD//PIK3R5//PKN1//PPP1R15A//PPP4C//PRKCD//PSMA3//PSMC3//PSMC5//PSMD13//P…
GO:0044237	cellular_metabolic_process	Biological Process	246	7607	463	17492	1.49431e-05	0.00127074	4.82556	1.22174	0.531317	ACSM3//ADM//ADPGK//AFG3L2//AKTIP//ALDH18A1//ALDH1A3//ALOX5//ANAPC7//ANKZF1//AP2M1//APOBEC3B//ARAF//ARID4A//ASAH1//ATP1A1//ATXN3//AXIN2//BAP1//BAZ1B//BAZ2A//BRMS1//BTD//CAB39//CAMK1//CANT1//CBX4//CD74//CDIPT//CHERP//CHUK//CLK2//CMAS//CNP//COPS7B//CORIN//CPNE1//CPOX//CPSF1//CPVL//CROT//CSF2RA//CSK//CTSO//CYB5B//CYP27A1//CYP4F12//DAP//DAPP1//DDX42//DDX5//DEDD2//DHX29//DHX38//DNA2//DNAJA3//DNMT1//ECE…
GO:0070201	regulation_of_establishment_of_protein_localization	Biological Process	40	742	463	17492	1.68331e-05	0.00140445	4.77384	2.03664	0.0863931	ABCG1//ADAM8//AIM2//BAP1//CAMK1//CARD16//CARD17//CASP1//CHUK//CSK//DNAJA1//F2RL1//FCN1//GBP1//GDI1//GLMN//HDAC3//HMGN3//HPCA//IFI27//IFIH1//ITPR2//IWS1//KARS//LCP1//LILRA2//LILRA5//NADK//OSM//PAK1//PKIG//PRKCD//RANGAP1//RAP1A//SEC16A//TLR10//TLR4//TNFRSF1B//TP53//UBR5
GO:0002218	activation_of_innate_immune_response	Biological Process	20	257	463	17492	1.77818e-05	0.00145613	4.75002	2.94005	0.0431965	AIM2//CHUK//FCN1//HCK//IFIH1//IRF7//LGMN//LILRA2//MNDA//NOD1//PAK1//PRKCD//PSMA3//PSMC3//PSMC5//PSMD13//RAF1//TLR10//TLR4//TNIP2
GO:0080135	regulation_of_cellular_response_to_stress	Biological Process	39	721	463	17492	1.99523e-05	0.00160416	4.70001	2.04356	0.0842333	ARHGEF2//ATXN3//AXIN2//BCL6//CD74//DDX5//DNAJA1//EDAR//F2RL1//GADD45A//GRN//HDAC3//KARS//KLF4//LTBR//MAP2K1//MAPKAP1//NAMPT//NOD1//NUP210//NUP93//PAK1//PARG//PARP9//PDE8A//PKN1//PPP1R15A//PPP4C//PRKCD//PSAP//PTK2B//QARS//RASSF2//TERF2//THOC1//TLR4//TP53//UBR5//WRNIP1
GO:0006796	phosphate-containing_compound_metabolic_process	Biological Process	87	2137	463	17492	2.44351e-05	0.00189819	4.61199	1.53806	0.187905	ACSM3//ADPGK//ALDH18A1//ARAF//ATP1A1//BAZ1B//CAB39//CAMK1//CDIPT//CHUK//CLK2//CNP//CPNE1//CROT//CSF2RA//CSK//DAPP1//EIF2S1//ENPP2//FER//FGF16//FIG4//FOXK1//GFPT2//GMFG//GUCY1B2//HCK//HEXB//IGF2R//IL18//IL2RB//KARS//LPCAT1//LPCAT3//LRRK1//MAP2K1//MAP3K8//MAPK9//MARK3//MAST3//MINPP1//MTMR12//NADK//NAMPT//NDUFB5//NOD1//NRBP1//PAK1//PANK4//PARP9//PDE8A//PGS1//PI4KA//PI4KB//PIGN//PIGS//PIK3CB//PIK3CD/…
GO:0031325	positive_regulation_of_cellular_metabolic_process	Biological Process	123	3301	463	17492	2.44679e-05	0.00189819	4.6114	1.40773	0.265659	ABCG1//ADAM8//ADM//AIM2//AKTIP//ARAF//ARHGEF2//ARID4A//ATXN3//AXIN2//BCL6//BRMS1//BTBD10//CAB39//CALCOCO1//CAMK1//CASP1//CD74//CHUK//CIDEB//CNBP//CRK//CRTC3//CSK//DAG1//DAP//DDX5//DHX29//DNA2//DNMT1//ECE1//EDAR//EEF2//ELK1//ENPP2//F2RL1//FLOT1//FOS//FOXK1//GADD45A//GLMN//GNAI2//GORASP1//GRN//HABP4//HCFC1//HDAC3//HEXB//HMGN3//HNRNPA2B1//HNRNPAB//HSPE1//IL18//IRF4//IRF7//IRF8//JMJD6//KARS//KLF4//LG…
GO:0006661	phosphatidylinositol_biosynthetic_process	Biological Process	12	108	463	17492	2.86926e-05	0.00218757	4.54223	4.19774	0.0259179	CDIPT//FIG4//MTMR12//PI4KA//PI4KB//PIGN//PIGS//PIK3CB//PIK3CD//PIK3R5//RUFY1//SACM1L
GO:0050707	regulation_of_cytokine_secretion	Biological Process	17	203	463	17492	2.97732e-05	0.00223148	4.52617	3.16382	0.0367171	AIM2//CARD16//CARD17//CASP1//CHUK//F2RL1//FCN1//GBP1//GLMN//IFIH1//KARS//LILRA2//LILRA5//OSM//TLR10//TLR4//TNFRSF1B
GO:0033993	response_to_lipid	Biological Process	43	844	463	17492	3.12672e-05	0.00227932	4.50491	1.9248	0.0928726	ABCG1//ADM//ARPC1B//ATP1A1//ATP1A3//CALCOCO1//CARD16//CARD17//CASP1//CBX3//CHUK//CLK2//CNP//DAG1//DDX5//DNAJA1//EEF2//ELK1//FER//FOS//GRAMD1A//HCK//IGF2R//IL18//IRF8//KLF4//LPAR1//MSTN//NASP//NOTCH1//NPC1//PRDX3//PTK2B//RXRB//STAT3//TLR4//TNFRSF1B//TNIP2//TP53//TRIM25//TXNIP//UBR5//WBP2
GO:0032880	regulation_of_protein_localization	Biological Process	49	1011	463	17492	3.14424e-05	0.00227932	4.50248	1.83106	0.105832	ABCG1//ADAM8//AIM2//AP2M1//BAP1//CAMK1//CARD16//CARD17//CASP1//CHUK//CSK//DAG1//DNAJA1//EPB41L2//F2RL1//FCN1//GBP1//GDI1//GLMN//HDAC3//HMGN3//HPCA//IFI27//IFIH1//ITPR2//IWS1//KARS//LCP1//LILRA2//LILRA5//NADK//OSM//PAK1//PARP9//PKIG//PRKCD//RANGAP1//RAP1A//RDX//SEC16A//STX3//SUMO1//TLR10//TLR4//TMBIM1//TNFRSF1B//TOR1A//TP53//UBR5
GO:0006952	defense_response	Biological Process	60	1333	463	17492	3.5033e-05	0.00248972	4.45552	1.70051	0.12959	ADAM8//ADM//AIM2//ALOX5//APOBEC3B//ARHGEF2//BCL6//BST2//CASP1//CD300C//CD74//CD97//CHUK//CORO1A//F2RL1//FCN1//FLNB//FOS//GBP1//GRN//HCK//HLA-B//HLA-H//IFI27//IFIH1//IFIT3//IFNGR2//IL18//IRF4//IRF7//IRF8//LILRA2//LILRA5//LYZ//MNDA//MOV10//NAMPT//NFRKB//NOD1//NOTCH1//OAS1//OAS2//OAS3//PARP9//PIK3CD//PRKCD//PTK2B//RAB20//SNAP23//STAT3//STAT6//TLR10//TLR4//TNFRSF1B//TNIP2//TP53//TRIM21//TRIM25//TTC4/…
GO:0009967	positive_regulation_of_signal_transduction	Biological Process	71	1663	463	17492	3.54708e-05	0.00248972	4.45013	1.61296	0.153348	ADAM8//AXIN2//BST2//CANT1//CARD16//CASP1//CD74//CHERP//CHUK//CIDEB//CPNE1//CRK//CSK//DDX5//DEDD2//EDAR//F2RL1//FGF16//FLOT1//GADD45A//GNAI2//HDAC3//IL18//IRF7//KARS//LASP1//LILRA5//LPAR1//LRRK1//LTBR//MAP2K1//MAP3K8//MAPK9//MOAP1//MSTN//NLGN3//NOD1//NOTCH1//NUP93//OSM//PAK1//PARP9//PDE8A//PIK3CB//PIK3CD//PIK3R5//PKN1//PLAUR//PRKCD//PRMT5//PSAP//PSMA3//PSMC3//PSMC5//PSMD13//PTBP1//PTK2B//RAF1//RAP…
GO:0001817	regulation_of_cytokine_production	Biological Process	37	692	463	17492	4.1813e-05	0.00288902	4.37869	2.02001	0.0799136	ADAM8//AIM2//ARHGEF2//BAP1//BCL6//BST2//CARD16//CARD17//CASP1//CD74//CHUK//CSK//F2RL1//FCN1//FLOT1//GBP1//GLMN//HOMER3//IFIH1//IL18//IRF4//IRF7//IRF8//KARS//KLF4//LILRA2//LILRA5//MNDA//NOD1//OSM//STAT3//STAT6//TLR10//TLR4//TNFRSF1B//TRIM21//TRIM25
GO:0009966	regulation_of_signal_transduction	Biological Process	116	3112	463	17492	4.51671e-05	0.00307275	4.34518	1.40824	0.25054	ADAM8//ADM//ARAF//ARHGAP15//ARHGAP30//ARHGEF2//AXIN2//BCL6//BST1//BST2//CANT1//CARD16//CASP1//CD74//CHD4//CHERP//CHUK//CIDEB//CPNE1//CRK//CRTC3//CSK//DAG1//DDX5//DEDD2//DNA2//DNAJA1//EDAR//F2RL1//FER//FGF16//FLOT1//GADD45A//GBP1//GDI1//GNAI2//HDAC3//HIF1AN//HOMER3//IFNGR2//IL18//IQSEC1//IRF4//IRF7//KARS//KCTD21//KLF4//LASP1//LGMN//LILRA2//LILRA5//LPAR1//LRRK1//LTBR//MAP2K1//MAP3K8//MAPK9//MAPKAP1…
GO:1902533	positive_regulation_of_intracellular_signal_transduction	Biological Process	48	1003	463	17492	5.20925e-05	0.0034902	4.28322	1.808	0.103672	ADAM8//BST2//CANT1//CARD16//CASP1//CD74//CHERP//CHUK//CPNE1//CRK//CSK//DDX5//EDAR//F2RL1//FGF16//GADD45A//GNAI2//HDAC3//IL18//KARS//LILRA5//LPAR1//LRRK1//LTBR//MAP2K1//MAP3K8//NOD1//NOTCH1//OSM//PAK1//PDE8A//PIK3CB//PIK3CD//PIK3R5//PKN1//PSAP//PTBP1//PTK2B//RAF1//RAP1A//RASSF2//RGL2//RRAGD//SEMA4D//TLR4//TNIP2//TP53//TRIM25
GO:0043067	regulation_of_programmed_cell_death	Biological Process	67	1563	463	17492	5.37333e-05	0.00351043	4.26976	1.61948	0.144708	ADAM8//ADM//ALDH1A3//API5//ARAF//ARHGEF2//ASAH1//BCL6//BRMS1//CARD16//CARD17//CASP1//CBX4//CD74//CFDP1//CIDEB//CORO1A//DAP//DDX42//DEDD2//DNAJA1//DNAJA3//DNMT1//EIF2S1//GADD45A//GNAI2//GRN//HCK//HDAC3//HSPE1//IFIT3//IGF2R//IL2RB//IRF7//KLF4//LGMN//LPAR1//LTBR//MAPK9//MNDA//MOAP1//MSTN//NOD1//NOTCH1//PIK3CB//PIK3CD//PLAUR//PRDX3//PRKCD//PSMC5//PTK2B//PTRH2//QARS//RAF1//RASSF2//RGL2//SEMA4D//STAT3/…
GO:0002758	innate_immune_response-activating_signal_transduction	Biological Process	18	234	463	17492	5.39822e-05	0.00351043	4.26775	2.90613	0.0388769	CHUK//FCN1//HCK//IFIH1//IRF7//LGMN//LILRA2//NOD1//PAK1//PRKCD//PSMA3//PSMC3//PSMC5//PSMD13//RAF1//TLR10//TLR4//TNIP2
GO:0045087	innate_immune_response	Biological Process	39	760	463	17492	6.32902e-05	0.00402049	4.19866	1.9387	0.0842333	AIM2//APOBEC3B//ARHGEF2//BST2//CASP1//CHUK//CORO1A//F2RL1//FCN1//FLNB//GBP1//HCK//HLA-B//HLA-H//IFI27//IFIH1//IFIT3//IFNGR2//IL18//IRF4//IRF7//IRF8//LILRA2//LILRA5//NOD1//OAS1//OAS2//OAS3//PARP9//PIK3CD//PRKCD//RAB20//TLR10//TLR4//TP53//TRIM21//TRIM25//TTC4//WRNIP1
GO:0033209	tumor_necrosis_factor-mediated_signaling_pathway	Biological Process	12	117	463	17492	6.36441e-05	0.00402049	4.19624	3.87484	0.0259179	AIM2//CHUK//EDAR//KARS//LTBR//PSMA3//PSMC3//PSMC5//PSMD13//PTK2B//TNFRSF1B//TNFSF13
GO:0051345	positive_regulation_of_hydrolase_activity	Biological Process	39	766	463	17492	7.48438e-05	0.0046614	4.12584	1.92351	0.0842333	AHSA1//AIM2//ARFGAP2//ARHGAP15//ARHGAP30//CASP1//CIDEB//CRK//DAP//DNAJA1//DNAJB4//DOCK2//DOCK9//F2RL1//GDI1//GRN//HPCA//HSPE1//IQSEC1//KARS//LGMN//LPAR1//NEDD9//NOD1//PKP4//PPP1R15A//PRKCD//PSAP//PTK2B//RANGAP1//RAP1A//RASA3//RGS2//RIC8B//RIN2//SEC23B//SEMA4D//STAT3//TBC1D22B
GO:0051171	regulation_of_nitrogen_compound_metabolic_process	Biological Process	192	5787	463	17492	8.00826e-05	0.00491841	4.09646	1.25345	0.414687	ABCG1//ADAM8//AIM2//AKTIP//ARAF//ARHGEF2//ARID4A//ATXN3//AXIN2//BAP1//BAZ1B//BAZ2A//BCL6//BRMS1//BST1//BST2//C9orf78//CAB39//CALCOCO1//CAMK1//CAMK2N2//CARD16//CARD17//CASP1//CBX3//CBX4//CD74//CHD4//CHUK//CIDEB//CLK2//CNBP//CRK//CRTC3//CSK//DAG1//DAP//DDX5//DEDD2//DHX29//DNAJA1//DNAJA3//DNMT1//EDAR//EEF2//EIF2S1//ELK1//ENPP2//EWSR1//F2RL1//FEM1A//FER//FGF16//FLOT1//FOS//FOXK1//GADD45A//GBP1//GLE1/…
GO:0008654	phospholipid_biosynthetic_process	Biological Process	18	243	463	17492	8.78407e-05	0.00532098	4.0563	2.7985	0.0388769	CDIPT//CPNE1//FIG4//HEXB//LPCAT1//LPCAT3//MTMR12//PGS1//PI4KA//PI4KB//PIGN//PIGS//PIK3CB//PIK3CD//PIK3R5//PISD//RUFY1//SACM1L
GO:0051173	positive_regulation_of_nitrogen_compound_metabolic_process	Biological Process	116	3164	463	17492	9.27653e-05	0.00554335	4.03261	1.3851	0.25054	ABCG1//ADAM8//AIM2//AKTIP//ARAF//ARHGEF2//ARID4A//ATXN3//AXIN2//BCL6//BRMS1//CAB39//CALCOCO1//CAMK1//CASP1//CD74//CHUK//CIDEB//CNBP//CRK//CRTC3//CSK//DAG1//DAP//DDX5//DHX29//DNMT1//EDAR//EEF2//ELK1//ENPP2//F2RL1//FLOT1//FOS//FOXK1//GADD45A//GLMN//GNAI2//GORASP1//GRN//HABP4//HCFC1//HDAC3//HEXB//HMGN3//HNRNPA2B1//HNRNPAB//HSPE1//IL18//IRF4//IRF7//IRF8//JMJD6//KARS//KLF4//LGMN//LILRA5//LPAR1//LPCAT1…
GO:0009893	positive_regulation_of_metabolic_process	Biological Process	129	3604	463	17492	9.675e-05	0.00570438	4.01435	1.35227	0.278618	ABCG1//ADAM8//ADM//AIM2//AKTIP//ARAF//ARHGEF2//ARID4A//ATXN3//AXIN2//BAZ1B//BCL6//BRMS1//BTBD10//CAB39//CALCOCO1//CAMK1//CASP1//CD74//CHUK//CIDEB//CNBP//CRK//CRTC3//CSK//DAG1//DAP//DDX5//DHX29//DNA2//DNMT1//ECE1//EDAR//EEF2//ELK1//ENPP2//F2RL1//FLOT1//FOS//FOXK1//GADD45A//GLMN//GNAI2//GORASP1//GRN//HABP4//HCFC1//HDAC3//HEXB//HMGN3//HNRNPA2B1//HNRNPAB//HSPE1//IL18//IRF4//IRF7//IRF8//JMJD6//KARS//K…
GO:0010942	positive_regulation_of_cell_death	Biological Process	36	694	463	17492	9.80588e-05	0.00570548	4.00851	1.95975	0.0777538	ADAM8//ADM//ALDH1A3//ARHGEF2//AXIN2//BCL6//BRMS1//CASP1//CIDEB//DAP//DEDD2//DNAJA1//EIF2S1//ELK1//FOS//GADD45A//GRN//HSPE1//IGF2R//LPAR1//LTBR//MAPK9//MNDA//MOAP1//NOD1//NOTCH1//PIK3CB//PIK3CD//PLAUR//PRKCD//PTRH2//RASSF2//TLR4//TNFRSF1B//TP53//TXNIP
GO:0043405	regulation_of_MAP_kinase_activity	Biological Process	22	339	463	17492	0.000108401	0.00616498	3.96497	2.45178	0.0475162	ADAM8//CD74//CRK//CSK//DNAJA1//FGF16//GADD45A//KARS//LPAR1//MAP2K1//MAP3K8//NOD1//PAK1//PIK3CB//PIK3R5//PKN1//PRKCD//PTK2B//RAF1//RGS2//STK38//TLR4
GO:0046514	ceramide_catabolic_process	Biological Process	5	19	463	17492	0.000108745	0.00616498	3.96359	9.94203	0.0107991	ASAH1//GBA2//HEXB//NAGA//PSAP
GO:0046474	glycerophospholipid_biosynthetic_process	Biological Process	16	204	463	17492	0.000110623	0.00619206	3.95616	2.96311	0.0345572	CDIPT//CPNE1//FIG4//LPCAT1//MTMR12//PGS1//PI4KA//PI4KB//PIGN//PIGS//PIK3CB//PIK3CD//PIK3R5//PISD//RUFY1//SACM1L
GO:0016310	phosphorylation	Biological Process	57	1303	463	17492	0.000120702	0.00667179	3.91829	1.65268	0.12311	ADPGK//ALDH18A1//ARAF//BAZ1B//CAB39//CAMK1//CHUK//CLK2//CSF2RA//CSK//EIF2S1//FER//FGF16//FOXK1//GMFG//HCK//IGF2R//IL18//IL2RB//KARS//LRRK1//MAP2K1//MAP3K8//MAPK9//MARK3//MAST3//NADK//NDUFB5//NOD1//NRBP1//PAK1//PANK4//PI4KA//PI4KB//PIK3CB//PIK3CD//PKN1//PPP4R1//PRKAB1//PRKAG1//PRKCD//PSMA3//PSMC3//PSMC5//PSMD13//PTK2B//RAF1//RASA3//RASSF2//SDHC//STAT3//STK38//STK40//TEC//TLR4//TNIP2//UQCRB
GO:0006807	nitrogen_compound_metabolic_process	Biological Process	223	6966	463	17492	0.000137759	0.00750294	3.86088	1.20943	0.481641	ABCG1//ACSM3//ADAM8//ADPGK//AFG3L2//AKTIP//ALDH18A1//ANAPC7//ANKZF1//AP2M1//APOBEC3B//ARAF//ARID4A//ASAH1//ATXN3//AXIN2//BAP1//BAZ1B//BAZ2A//BRMS1//BTD//CAB39//CAMK1//CANT1//CASP1//CBX4//CDIPT//CHERP//CHUK//CIDEB//CLK2//CNP//COPS7B//CORIN//CPNE1//CPOX//CPSF1//CPVL//CROT//CSF2RA//CSK//CTSO//DAG1//DAPP1//DDX42//DDX5//DEDD2//DHX29//DHX38//DNA2//DNMT1//ECE1//EDC4//EEF2//EIF2S1//ENPP2//EXTL2//FEM1A//F…
GO:0060548	negative_regulation_of_cell_death	Biological Process	46	987	463	17492	0.000139132	0.00750294	3.85657	1.76076	0.0993521	ADAM8//API5//ARAF//ARHGEF2//BCL6//BTBD10//CARD16//CBX4//CD74//CFDP1//CORO1A//DNAJA1//DNAJA3//DNMT1//GNAI2//GRN//HCK//HDAC3//IFIT3//IL2RB//IRF7//KLF4//LGMN//NOTCH1//NPC1//PDE8A//PLAUR//PRDX3//PRKCD//PSAP//PSMC5//PTK2B//PTRH2//QARS//RAF1//RGL2//SEMA4D//STAT3//STK40//TMBIM1//TMBIM4//TNFRSF1B//TNIP2//TP53//TSC22D3//UNG
GO:0002479	antigen_processing_and_presentation_of_exogenous_peptide_antigen_via_MHC_class_I,_TAP-dependent	Biological Process	9	75	463	17492	0.000157548	0.00839369	3.80259	4.53356	0.0194384	CHUK//HLA-B//HLA-H//NCF4//PSMA3//PSMC3//PSMC5//PSMD13//SNAP23
GO:0043170	macromolecule_metabolic_process	Biological Process	200	6145	463	17492	0.000166442	0.00876196	3.77874	1.22961	0.431965	ABCG1//ADAM8//ADM//AFG3L2//AKTIP//ANAPC7//ANKZF1//AP2M1//APOBEC3B//ARAF//ARID4A//ATXN3//AXIN2//BAP1//BAZ1B//BAZ2A//BRMS1//CAB39//CAMK1//CANT1//CASP1//CBX4//CHERP//CHUK//CIDEB//CLK2//COPS7B//CORIN//CPNE1//CPSF1//CPVL//CSF2RA//CSK//CTSO//DAG1//DAPP1//DDX42//DDX5//DEDD2//DHX29//DHX38//DNA2//DNAJA3//DNMT1//ECE1//EDC4//EEF2//EIF2S1//ENPP2//EXTL2//FEM1A//FER//FGF16//FGL2//FOS//FOXK1//GADD45A//GALNT2//G…
GO:0030335	positive_regulation_of_cell_migration	Biological Process	28	500	463	17492	0.000169301	0.00880763	3.77134	2.11566	0.0604752	AAMP//ADAM8//ARHGEF2//CD74//CORO1A//CRK//ENPP2//F2RL1//FER//FERMT3//FGF16//GNAI2//GRN//IQSEC1//KARS//LGMN//LPAR1//MSTN//NEDD9//NOTCH1//PAK1//PIK3CD//PTK2B//RDX//SEMA4A//SEMA4D//STAT3//TP53
GO:0002684	positive_regulation_of_immune_system_process	Biological Process	51	1143	463	17492	0.000175184	0.00900771	3.75651	1.68571	0.110151	ADAM8//AIM2//ARPC1B//BCL6//BST1//CD74//CHUK//CORO1A//CRK//CSK//DNAJA3//F2RL1//FCGR3A//FCN1//FER//FLOT1//FOS//HCK//HLA-B//HLA-H//IFIH1//IL18//IRF7//KARS//LGMN//LILRA2//MAP3K8//MNDA//MSTN//NOD1//PAK1//PARP9//PIK3CB//PIK3CD//PRKCD//PSMA3//PSMC3//PSMC5//PSMD13//PTK2B//PVR//RAF1//RAP1A//STAT3//STAT6//TEC//TLR10//TLR4//TNFSF13//TNIP2//TP53
GO:0051092	positive_regulation_of_NF-kappaB_transcription_factor_activity	Biological Process	13	150	463	17492	0.000180197	0.00915895	3.74425	3.27424	0.0280778	ADAM8//AIM2//ARHGEF2//CARD16//CHUK//FER//FLOT1//IL18//NOD1//PRDX3//STAT3//TLR4//TRIM25
GO:0048002	antigen_processing_and_presentation_of_peptide_antigen	Biological Process	15	192	463	17492	0.000187867	0.00944032	3.72615	2.95154	0.0323974	ACTR1B//AP2M1//CD74//CHUK//DCTN5//HLA-B//HLA-H//LGMN//NCF4//PSMA3//PSMC3//PSMC5//PSMD13//SEC24C//SNAP23
GO:0006468	protein_phosphorylation	Biological Process	45	973	463	17492	0.000195649	0.00972092	3.70852	1.74726	0.0971922	ARAF//BAZ1B//CAB39//CAMK1//CHUK//CLK2//CSF2RA//CSK//EIF2S1//FER//FGF16//GMFG//HCK//IGF2R//IL18//IL2RB//KARS//LRRK1//MAP2K1//MAP3K8//MAPK9//MARK3//MAST3//NOD1//NRBP1//PAK1//PIK3CD//PKN1//PPP4R1//PRKAB1//PRKAG1//PRKCD//PSMA3//PSMC3//PSMC5//PSMD13//PTK2B//RAF1//RASA3//RASSF2//STK38//STK40//TEC//TLR4//TNIP2
GO:0042981	regulation_of_apoptotic_process	Biological Process	64	1543	463	17492	0.000205075	0.010076	3.68809	1.56701	0.138229	ADAM8//ADM//ALDH1A3//API5//ARAF//ARHGEF2//BCL6//BRMS1//CARD16//CARD17//CASP1//CBX4//CD74//CFDP1//CIDEB//CORO1A//DAP//DDX42//DEDD2//DNAJA1//DNMT1//EIF2S1//GADD45A//GNAI2//GRN//HCK//HDAC3//HSPE1//IFIT3//IGF2R//IL2RB//IRF7//KLF4//LGMN//LPAR1//LTBR//MAPK9//MNDA//MOAP1//MSTN//NOD1//NOTCH1//PIK3CB//PIK3CD//PLAUR//PRDX3//PRKCD//PTK2B//PTRH2//QARS//RAF1//RASSF2//RGL2//SEMA4D//STAT3//STK40//TMBIM1//TMBIM4…
GO:0043549	regulation_of_kinase_activity	Biological Process	41	862	463	17492	0.000212406	0.0103215	3.67283	1.79695	0.0885529	ADAM8//CAB39//CAMK1//CAMK2N2//CD74//CRK//CSK//DAG1//DNAJA1//FGF16//GADD45A//GMFG//IL18//KARS//KLF4//LILRA5//LPAR1//MAP2K1//MAP3K8//MAPKAP1//MSTN//NEDD9//NOD1//NRBF2//PAK1//PIK3CB//PIK3R5//PKIG//PKN1//PRDX3//PRKAG1//PRKCD//PTK2B//QARS//RAF1//RAP1A//RASSF2//RGS2//STK38//TLR4//UVRAG
GO:0050706	regulation_of_interleukin-1_beta_secretion	Biological Process	7	47	463	17492	0.000218877	0.0105204	3.6598	5.62676	0.0151188	AIM2//CARD16//CARD17//CASP1//LILRA2//LILRA5//TLR4
GO:0042590	antigen_processing_and_presentation_of_exogenous_peptide_antigen_via_MHC_class_I	Biological Process	9	79	463	17492	0.000235208	0.0111838	3.62855	4.30402	0.0194384	CHUK//HLA-B//HLA-H//NCF4//PSMA3//PSMC3//PSMC5//PSMD13//SNAP23
GO:0023014	signal_transduction_by_protein_phosphorylation	Biological Process	23	384	463	17492	0.000247633	0.0116493	3.60619	2.26285	0.049676	ARAF//CAB39//CHUK//CSF2RA//FGF16//IL18//IL2RB//KARS//MAP2K1//MAP3K8//MAPK9//MARK3//NOD1//PAK1//PKN1//PSMA3//PSMC3//PSMC5//PSMD13//PTK2B//RAF1//RASA3//TNIP2
GO:0010468	regulation_of_gene_expression	Biological Process	150	4407	463	17492	0.000252539	0.0117172	3.59767	1.2859	0.323974	ADAM8//AIM2//ARHGEF2//ARID4A//AXIN2//BAP1//BAZ1B//BAZ2A//BCL6//BRMS1//C9orf78//CALCOCO1//CAMK1//CARD16//CBX3//CBX4//CD74//CHD4//CHUK//CLK2//CNBP//CPNE1//CRK//CRTC3//DAP//DDX5//DEDD2//DHX29//DNAJA3//DNMT1//EDAR//EDC4//EEF2//EIF2S1//ELK1//EWSR1//F2RL1//FER//FLOT1//FOS//FOXK1//GLE1//GLMN//GSPT1//HABP4//HCFC1//HCK//HDAC3//HEXB//HIF1AN//HMGN3//HNRNPA2B1//HNRNPAB//IFI27//IFT52//IL18//IRF4//IRF7//IRF8//…
GO:0000165	MAPK_cascade	Biological Process	22	360	463	17492	0.000254377	0.0117172	3.59452	2.30876	0.0475162	ARAF//CHUK//CSF2RA//FGF16//IL18//IL2RB//KARS//MAP2K1//MAP3K8//MAPK9//MARK3//NOD1//PAK1//PKN1//PSMA3//PSMC3//PSMC5//PSMD13//PTK2B//RAF1//RASA3//TNIP2
GO:0032651	regulation_of_interleukin-1_beta_production	Biological Process	9	80	463	17492	0.000258927	0.0117454	3.58682	4.25022	0.0194384	AIM2//CARD16//CARD17//CASP1//LILRA2//LILRA5//MNDA//NOD1//TLR4
GO:0051607	defense_response_to_virus	Biological Process	15	198	463	17492	0.000262628	0.0117454	3.58066	2.8621	0.0323974	APOBEC3B//BST2//F2RL1//GBP1//IFI27//IFIH1//IFIT3//IRF7//MOV10//OAS1//OAS2//OAS3//PARP9//TRIM25//TTC4
GO:0051272	positive_regulation_of_cellular_component_movement	Biological Process	29	540	463	17492	0.000263312	0.0117454	3.57953	2.02891	0.062635	AAMP//ADAM8//ARHGEF2//BCL6//CD74//CORO1A//CRK//ENPP2//F2RL1//FER//FERMT3//FGF16//GNAI2//GRN//IQSEC1//KARS//LGMN//LPAR1//MSTN//NEDD9//NOTCH1//PAK1//PIK3CD//PTK2B//RDX//SEMA4A//SEMA4D//STAT3//TP53
GO:0008360	regulation_of_cell_shape	Biological Process	13	156	463	17492	0.000265613	0.0117454	3.57575	3.14831	0.0280778	ARHGAP15//CFDP1//CORO1A//CRK//DAG1//HCK//HEXB//LPAR1//PLXNB2//PTK2B//RDX//SEMA4A//SEMA4D
GO:0050778	positive_regulation_of_immune_response	Biological Process	40	844	463	17492	0.000273003	0.011866	3.56383	1.79051	0.0863931	ADAM8//AIM2//ARPC1B//CD74//CHUK//CRK//CSK//F2RL1//FCGR3A//FCN1//FLOT1//HCK//HLA-B//HLA-H//IFIH1//IL18//IRF7//KARS//LGMN//LILRA2//MNDA//NOD1//PAK1//PARP9//PIK3CB//PIK3CD//PRKCD//PSMA3//PSMC3//PSMC5//PSMD13//PVR//RAF1//RAP1A//STAT6//TEC//TLR10//TLR4//TNFSF13//TNIP2
GO:0002286	T_cell_activation_involved_in_immune_response	Biological Process	8	64	463	17492	0.000273707	0.011866	3.56271	4.72246	0.0172786	F2RL1//FGL2//IRF4//LCP1//SEMA4A//STAT3//STAT6//TP53
GO:0031629	synaptic_vesicle_fusion_to_presynaptic_active_zone_membrane	Biological Process	4	13	463	17492	0.000286498	0.0121817	3.54288	11.6245	0.00863931	SNAP23//SNAP29//STX11//STX3
GO:0046479	glycosphingolipid_catabolic_process	Biological Process	4	13	463	17492	0.000286498	0.0121817	3.54288	11.6245	0.00863931	GBA2//HEXB//NAGA//PSAP
GO:0002474	antigen_processing_and_presentation_of_peptide_antigen_via_MHC_class_I	Biological Process	10	101	463	17492	0.00034268	0.0144317	3.46511	3.74056	0.0215983	CHUK//HLA-B//HLA-H//NCF4//PSMA3//PSMC3//PSMC5//PSMD13//SEC24C//SNAP23
GO:0050715	positive_regulation_of_cytokine_secretion	Biological Process	12	140	463	17492	0.000350461	0.0146202	3.45536	3.23826	0.0259179	AIM2//CASP1//CHUK//F2RL1//FCN1//GLMN//IFIH1//KARS//LILRA2//LILRA5//OSM//TLR4
GO:1902532	negative_regulation_of_intracellular_signal_transduction	Biological Process	27	497	463	17492	0.000356223	0.0147217	3.44828	2.05242	0.0583153	ARHGEF2//BCL6//CD74//CPNE1//CRTC3//CSK//DAG1//DNAJA1//F2RL1//GBP1//GNAI2//HDAC3//HOMER3//KLF4//LPAR1//MAPKAP1//MARK3//MSTN//PLAUR//PRKCD//QARS//RASA3//RASSF2//RGS2//SESN3//STK38//TLR4
GO:0050792	regulation_of_viral_process	Biological Process	15	204	463	17492	0.00036177	0.0148006	3.44157	2.77792	0.0323974	APOBEC3B//BST2//CD74//DDX5//FCN1//IFI27//IGF2R//NOTCH1//OAS1//OAS2//OAS3//PSMC3//SMARCB1//TRIM21//TRIM25
GO:0051222	positive_regulation_of_protein_transport	Biological Process	24	420	463	17492	0.000364828	0.0148006	3.43791	2.15884	0.0518359	ABCG1//ADAM8//AIM2//BAP1//CAMK1//CASP1//CHUK//F2RL1//FCN1//GLMN//HDAC3//HPCA//IFIH1//KARS//LILRA2//LILRA5//NADK//OSM//PAK1//PRKCD//SEC16A//TLR4//TP53//UBR5
GO:2000147	positive_regulation_of_cell_motility	Biological Process	28	525	463	17492	0.000374089	0.0150384	3.42702	2.01492	0.0604752	AAMP//ADAM8//ARHGEF2//CD74//CORO1A//CRK//ENPP2//F2RL1//FER//FERMT3//FGF16//GNAI2//GRN//IQSEC1//KARS//LGMN//LPAR1//MSTN//NEDD9//NOTCH1//PAK1//PIK3CD//PTK2B//RDX//SEMA4A//SEMA4D//STAT3//TP53
GO:0040017	positive_regulation_of_locomotion	Biological Process	29	553	463	17492	0.000389119	0.0153768	3.40992	1.98121	0.062635	AAMP//ADAM8//ARHGEF2//CD74//CORO1A//CRK//ENPP2//F2RL1//FER//FERMT3//FGF16//GNAI2//GRN//IQSEC1//KARS//LGMN//LPAR1//MSTN//NEDD9//NOTCH1//PAK1//PIK3CD//PTK2B//RDX//SEMA4A//SEMA4D//STAT3//STX3//TP53
GO:0099500	vesicle_fusion_to_plasma_membrane	Biological Process	4	14	463	17492	0.00039274	0.0153768	3.40589	10.7942	0.00863931	SNAP23//SNAP29//STX11//STX3
GO:0051128	regulation_of_cellular_component_organization	Biological Process	92	2477	463	17492	0.00039294	0.0153768	3.40567	1.4032	0.198704	AIM2//ARHGAP15//ARHGEF2//ARPC1B//AXIN2//BAP1//BCL6//BST1//BST2//CAMK1//CD53//CFDP1//CIDEB//CORO1A//CRK//DAG1//DNMT1//DYNC2LI1//ENPP2//F2RL1//FER//FIG4//FLOT1//GBA2//GBP1//GDI1//GLE1//GMFG//GORASP1//GRN//GSPT1//HCFC1//HCK//HEXB//HNRNPA2B1//HORMAD1//HPCA//IFRD1//IQSEC1//IWS1//KLF4//LCP1//LLPH//LPAR1//MAP2K1//MAP4//MAPK9//MID1IP1//MNS1//MOAP1//MOV10//MSTN//NDRG3//NEDD9//NLGN3//NOTCH1//PACSIN2//PAK1/…
GO:0043123	positive_regulation_of_I-kappaB_kinase|NF-kappaB_signaling	Biological Process	14	184	463	17492	0.000399315	0.0154892	3.39868	2.87454	0.0302376	BST2//CANT1//CARD16//CASP1//CD74//CHUK//EDAR//F2RL1//LPAR1//LTBR//NOD1//TLR4//TNIP2//TRIM25
GO:0032731	positive_regulation_of_interleukin-1_beta_production	Biological Process	7	52	463	17492	0.000415568	0.0159795	3.38136	5.08573	0.0151188	AIM2//CASP1//LILRA2//LILRA5//MNDA//NOD1//TLR4
GO:0045860	positive_regulation_of_protein_kinase_activity	Biological Process	28	530	463	17492	0.000434785	0.0165743	3.36173	1.99591	0.0604752	ADAM8//CAB39//CAMK1//CD74//CRK//CSK//DAG1//GADD45A//IL18//KARS//LILRA5//LPAR1//MAP2K1//MAP3K8//MAPKAP1//NEDD9//NOD1//PAK1//PIK3CB//PIK3R5//PKN1//PRKAG1//PRKCD//PTK2B//RAF1//RAP1A//RASSF2//TLR4
GO:0043065	positive_regulation_of_apoptotic_process	Biological Process	32	641	463	17492	0.000465665	0.0175998	3.33193	1.88604	0.0691145	ADAM8//ADM//ALDH1A3//ARHGEF2//BCL6//BRMS1//CASP1//CIDEB//DAP//DEDD2//DNAJA1//EIF2S1//GADD45A//GRN//HSPE1//IGF2R//LPAR1//LTBR//MAPK9//MNDA//MOAP1//NOD1//NOTCH1//PIK3CB//PIK3CD//PLAUR//PRKCD//PTRH2//RASSF2//TNFRSF1B//TP53//TXNIP
GO:0046649	lymphocyte_activation	Biological Process	22	377	463	17492	0.000478639	0.0179307	3.31999	2.20465	0.0475162	BCL6//BST2//CD74//CORO1A//DNAJA3//DOCK2//F2RL1//FGL2//IL18//IRF4//JMJD6//LCP1//PIK3CD//PRKCD//PTK2B//SEMA4A//SNX27//STAT3//STAT6//TLR4//TP53//UNG
GO:1903900	regulation_of_viral_life_cycle	Biological Process	12	145	463	17492	0.000482532	0.0179307	3.31647	3.1266	0.0259179	APOBEC3B//BST2//CD74//DDX5//FCN1//IFI27//NOTCH1//OAS1//OAS2//OAS3//TRIM21//TRIM25
GO:0045859	regulation_of_protein_kinase_activity	Biological Process	37	784	463	17492	0.000500472	0.0184193	3.30062	1.78297	0.0799136	ADAM8//CAB39//CAMK1//CAMK2N2//CD74//CRK//CSK//DAG1//DNAJA1//FGF16//GADD45A//GMFG//IL18//KARS//LILRA5//LPAR1//MAP2K1//MAP3K8//MAPKAP1//NEDD9//NOD1//PAK1//PIK3CB//PIK3R5//PKIG//PKN1//PRKAG1//PRKCD//PTK2B//QARS//RAF1//RAP1A//RASSF2//RGS2//STK38//TLR4//UVRAG
GO:0043410	positive_regulation_of_MAPK_cascade	Biological Process	28	535	463	17492	0.000504012	0.0184193	3.29756	1.97726	0.0604752	ADAM8//CD74//CRK//CSK//EDAR//F2RL1//GADD45A//GNAI2//KARS//LILRA5//LPAR1//LTBR//MAP2K1//MAP3K8//NOD1//NOTCH1//OSM//PAK1//PDE8A//PIK3CB//PIK3R5//PKN1//PSAP//PTK2B//RAF1//RAP1A//RASSF2//TLR4
GO:0043069	negative_regulation_of_programmed_cell_death	Biological Process	41	901	463	17492	0.000523146	0.0186589	3.28138	1.71916	0.0885529	ADAM8//API5//ARAF//ARHGEF2//BCL6//CARD16//CBX4//CD74//CFDP1//CORO1A//DNAJA1//DNAJA3//DNMT1//GNAI2//GRN//HCK//HDAC3//IFIT3//IL2RB//IRF7//KLF4//LGMN//NOTCH1//PLAUR//PRDX3//PRKCD//PSMC5//PTK2B//PTRH2//QARS//RAF1//RGL2//SEMA4D//STAT3//STK40//TMBIM1//TMBIM4//TNIP2//TP53//TSC22D3//UNG
GO:0019377	glycolipid_catabolic_process	Biological Process	4	15	463	17492	0.000524407	0.0186589	3.28033	10.0746	0.00863931	GBA2//HEXB//NAGA//PSAP
GO:0043368	positive_T_cell_selection	Biological Process	5	26	463	17492	0.00052798	0.0186589	3.27738	7.26533	0.0107991	CD74//DOCK2//IRF4//STAT3//STAT6
GO:0071900	regulation_of_protein_serine|threonine_kinase_activity	Biological Process	27	510	463	17492	0.000530685	0.0186589	3.27516	2.0001	0.0583153	ADAM8//CAB39//CAMK1//CD74//CRK//CSK//DNAJA1//FGF16//GADD45A//KARS//LPAR1//MAP2K1//MAP3K8//NOD1//PAK1//PIK3CB//PIK3R5//PKIG//PKN1//PRKAG1//PRKCD//PTK2B//RAF1//RGS2//STK38//TLR4//UVRAG
GO:0043068	positive_regulation_of_programmed_cell_death	Biological Process	32	646	463	17492	0.000531664	0.0186589	3.27436	1.87144	0.0691145	ADAM8//ADM//ALDH1A3//ARHGEF2//BCL6//BRMS1//CASP1//CIDEB//DAP//DEDD2//DNAJA1//EIF2S1//GADD45A//GRN//HSPE1//IGF2R//LPAR1//LTBR//MAPK9//MNDA//MOAP1//NOD1//NOTCH1//PIK3CB//PIK3CD//PLAUR//PRKCD//PTRH2//RASSF2//TNFRSF1B//TP53//TXNIP
GO:0043406	positive_regulation_of_MAP_kinase_activity	Biological Process	17	259	463	17492	0.000564351	0.0196501	3.24845	2.47975	0.0367171	ADAM8//CD74//CRK//CSK//GADD45A//KARS//LPAR1//MAP2K1//MAP3K8//NOD1//PAK1//PIK3CB//PIK3R5//PKN1//PTK2B//RAF1//TLR4
GO:0050731	positive_regulation_of_peptidyl-tyrosine_phosphorylation	Biological Process	14	191	463	17492	0.000580763	0.0200635	3.236	2.76919	0.0302376	ARHGEF2//CD74//ENPP2//IL18//LILRA5//LRRK1//NEDD9//OSM//PARP9//PTK2B//SEMA4D//STAT3//TEC//TP53
GO:0046477	glycosylceramide_catabolic_process	Biological Process	3	7	463	17492	0.000595669	0.0201066	3.225	16.1913	0.00647948	GBA2//NAGA//PSAP
GO:0071763	nuclear_membrane_organization	Biological Process	3	7	463	17492	0.000595669	0.0201066	3.225	16.1913	0.00647948	TMEM43//TOR1A//TOR1B
GO:0015931	nucleobase-containing_compound_transport	Biological Process	16	237	463	17492	0.000600196	0.0201066	3.22171	2.55053	0.0345572	CETN3//CPSF1//DHX38//FLOT1//GLE1//HNRNPA2B1//IWS1//NUP210//NUP93//SLC25A41//SLC35A5//SLC35B3//SLC35D2//TERF2//THOC1//UPF2
GO:0038093	Fc_receptor_signaling_pathway	Biological Process	16	237	463	17492	0.000600196	0.0201066	3.22171	2.55053	0.0345572	ARPC1B//CHUK//CRK//FCGR3A//FER//FOS//HCK//MAPK9//PAK1//PIK3CB//PRKCD//PSMA3//PSMC3//PSMC5//PSMD13//TEC
GO:0006913	nucleocytoplasmic_transport	Biological Process	17	261	463	17492	0.000615538	0.0204655	3.21075	2.46075	0.0367171	ANP32C//CAMK1//CPSF1//DHX38//GLE1//HNRNPA2B1//NUP210//NUP93//PRKAG1//RPAIN//SNRPB//STAT3//THOC1//TNPO3//TP53//TXNIP//UPF2
GO:0000302	response_to_reactive_oxygen_species	Biological Process	14	193	463	17492	0.00064395	0.0212504	3.19115	2.7405	0.0302376	ANKZF1//CHUK//CRK//EEF2//FER//FOS//KLF4//MAPK9//PRDX3//PRKCD//PTK2B//STAT6//TP53//TXNIP
GO:0034614	cellular_response_to_reactive_oxygen_species	Biological Process	11	130	463	17492	0.000681912	0.0221029	3.16627	3.19674	0.0237581	ANKZF1//CHUK//CRK//FER//FOS//KLF4//MAPK9//PRDX3//PRKCD//STAT6//TP53
GO:0071801	regulation_of_podosome_assembly	Biological Process	4	16	463	17492	0.000684668	0.0221029	3.16452	9.44492	0.00863931	ARHGEF2//HCK//LCP1//MAPK9
GO:0032604	granulocyte_macrophage_colony-stimulating_factor_production	Biological Process	2	2	463	17492	0.000699148	0.0221029	3.15543	37.7797	0.00431965	IL18//LILRA2
GO:0061847	response_to_cholecystokinin	Biological Process	2	2	463	17492	0.000699148	0.0221029	3.15543	37.7797	0.00431965	CHUK//CRK
GO:1905704	positive_regulation_of_inhibitory_synapse_assembly	Biological Process	2	2	463	17492	0.000699148	0.0221029	3.15543	37.7797	0.00431965	SEMA4A//SEMA4D
GO:0051169	nuclear_transport	Biological Process	17	264	463	17492	0.000699774	0.0221029	3.15504	2.43278	0.0367171	ANP32C//CAMK1//CPSF1//DHX38//GLE1//HNRNPA2B1//NUP210//NUP93//PRKAG1//RPAIN//SNRPB//STAT3//THOC1//TNPO3//TP53//TXNIP//UPF2
GO:0019882	antigen_processing_and_presentation	Biological Process	15	218	463	17492	0.000724799	0.0227309	3.13978	2.59952	0.0323974	ACTR1B//AP2M1//CD74//CHUK//DCTN5//HLA-B//HLA-H//LGMN//NCF4//PSMA3//PSMC3//PSMC5//PSMD13//SEC24C//SNAP23
GO:0060760	positive_regulation_of_response_to_cytokine_stimulus	Biological Process	7	57	463	17492	0.000733167	0.0228314	3.1348	4.63961	0.0151188	CASP1//CD74//CPNE1//IFIH1//IRF7//PARP9//TLR4
GO:0014741	negative_regulation_of_muscle_hypertrophy	Biological Process	5	28	463	17492	0.00075523	0.023354	3.12192	6.74637	0.0107991	MSTN//NOTCH1//PAK1//RGS2//TNFRSF1B
GO:0008104	protein_localization	Biological Process	80	2135	463	17492	0.000779767	0.0239453	3.10804	1.41563	0.172786	ABCG1//AIM2//AKTIP//AP2M1//ARFGAP2//ARHGEF2//ATP6V0E1//ATP6V1D//ATP6V1E1//ATXN3//AXIN2//BCL6//CD74//CETN3//CPSF1//CROT//CTAGE1//DAG1//DDX42//DHX38//DNAJA1//DNAJA3//DYNC2LI1//F2RL1//FCN1//FLNB//FLOT1//GBP1//GDI1//GLE1//GORASP1//HNRNPA2B1//HOMER3//IFT52//MAPK9//MCOLN1//MOAP1//NASP//NOTCH1//NPC1//NUP210//NUP93//PACSIN2//PEX5//PPP1R15A//RAB20//RAF1//RANGAP1//RAP1A//RDX//RPAIN//RPL36A//RRAGD//RUFY1//S…
GO:0032652	regulation_of_interleukin-1_production	Biological Process	9	93	463	17492	0.000794039	0.0242155	3.10016	3.6561	0.0194384	AIM2//CARD16//CARD17//CASP1//LILRA2//LILRA5//MNDA//NOD1//TLR4
GO:1901652	response_to_peptide	Biological Process	25	471	463	17492	0.000814273	0.0246624	3.08923	2.00529	0.0539957	ADM//ARHGEF2//ATP1A3//ATP6V0E1//ATP6V1D//ATP6V1E1//CHUK//CRK//CSK//DAG1//FER//KBTBD2//KLF4//LGMN//NAMPT//NOD1//NOTCH1//PAK1//PRKCD//RANGAP1//SESN3//STAT3//STAT6//TLR4//TP53
GO:0051090	regulation_of_DNA-binding_transcription_factor_activity	Biological Process	23	421	463	17492	0.000887338	0.0266926	3.05191	2.06397	0.049676	ADAM8//AIM2//ARHGEF2//BRMS1//CARD16//CHUK//CRTC3//DAP//FER//FLOT1//FOS//HCK//IL18//KLF4//MAPK9//NOD1//PRDX3//SMARCB1//STAT3//SUMO1//TLR4//TRIM21//TRIM25
GO:0032732	positive_regulation_of_interleukin-1_production	Biological Process	7	59	463	17492	0.000904127	0.0269042	3.04377	4.48234	0.0151188	AIM2//CASP1//LILRA2//LILRA5//MNDA//NOD1//TLR4
GO:0001819	positive_regulation_of_cytokine_production	Biological Process	24	448	463	17492	0.000906541	0.0269042	3.04261	2.02391	0.0518359	ADAM8//AIM2//ARHGEF2//CASP1//CD74//CHUK//F2RL1//FCN1//FLOT1//GLMN//IFIH1//IL18//IRF4//IRF7//IRF8//KARS//LILRA2//LILRA5//MNDA//NOD1//OSM//STAT3//STAT6//TLR4
GO:0046483	heterocycle_metabolic_process	Biological Process	104	2944	463	17492	0.000926623	0.0273169	3.0331	1.33461	0.224622	ACSM3//ADPGK//ALDH18A1//APOBEC3B//ARID4A//ATXN3//AXIN2//BAZ2A//BTD//CDIPT//CHERP//CNP//COPS7B//CPOX//CPSF1//CROT//CYP4F12//DDX42//DDX5//DEDD2//DHX38//DNA2//DNMT1//EDC4//ENPP2//EPHX1//EXTL2//FOS//FOXK1//GADD45A//GFPT2//GNPDA1//GSPT1//GTF2E2//GUCY1B2//HABP4//HNRNPA2B1//HORMAD1//INTS5//IRF7//IWS1//JMJD6//KARS//KLF4//MDN1//MOV10//NADK//NAMPT//NFRKB//NOTCH1//NRBF2//NRBP1//OAS2//OAS3//PABPC4//PANK4//PA…
GO:0002220	innate_immune_response_activating_cell_surface_receptor_signaling_pathway	Biological Process	10	115	463	17492	0.000958196	0.0280606	3.01855	3.28519	0.0215983	CHUK//FCN1//LILRA2//PAK1//PRKCD//PSMA3//PSMC3//PSMC5//PSMD13//RAF1
GO:0043087	regulation_of_GTPase_activity	Biological Process	25	477	463	17492	0.000973606	0.0283242	3.01162	1.98007	0.0539957	ARFGAP2//ARHGAP15//ARHGAP30//BCL6//CRK//DOCK2//DOCK9//F2RL1//GDI1//IQSEC1//NEDD9//PDE6D//PKP4//PLXNB2//PTK2B//RANGAP1//RAP1A//RASA3//RDX//RGS2//RIC8B//RIN2//SEC23B//SEMA4D//TBC1D22B
GO:0009725	response_to_hormone	Biological Process	40	904	463	17492	0.00104314	0.0301487	2.98166	1.67167	0.0863931	ABCG1//ADM//ARPC1B//ATP1A1//ATP1A3//ATP6V0E1//ATP6V1D//ATP6V1E1//CALCOCO1//CBX3//CHUK//CRK//CSK//DAG1//DDX5//DNAJA1//EEF2//ELK1//FER//FOS//GNAI2//KBTBD2//MSTN//NAMPT//NASP//NOTCH1//NPC1//PAK1//PRKCD//PTK2B//RANGAP1//RDX//RXRB//SESN3//SNRPN//STAT3//STAT6//TXNIP//UBR5//WBP2
GO:1903827	regulation_of_cellular_protein_localization	Biological Process	27	534	463	17492	0.0010563	0.030331	2.97621	1.91021	0.0583153	AP2M1//BAP1//CAMK1//CSK//DAG1//DNAJA1//EPB41L2//GBP1//GDI1//HDAC3//HPCA//IFI27//IWS1//LCP1//PAK1//PARP9//PKIG//PRKCD//RANGAP1//RAP1A//RDX//SEC16A//STX3//TMBIM1//TOR1A//TP53//UBR5
GO:0018193	peptidyl-amino_acid_modification	Biological Process	39	876	463	17492	0.00107468	0.0304628	2.96872	1.68197	0.0842333	ARID4A//BAZ1B//CAB39//CBX4//CHUK//CLK2//CSK//FER//GALNT2//HCFC1//HCK//HIF1AN//IFIH1//IGF2R//IRF4//JMJD6//MAP2K1//MAPK9//MARK3//MAST3//NUP210//NUP93//PIN4//PKN1//PRDX3//PRKCD//PRMT5//PTK2B//RANGAP1//RPN2//SETD1B//STK38//SUMO1//TADA2B//TAF5//TEC//TTLL1//USP22//ZDHHC18
GO:0032755	positive_regulation_of_interleukin-6_production	Biological Process	9	97	463	17492	0.00107539	0.0304628	2.96843	3.50533	0.0194384	ARHGEF2//CD74//F2RL1//IFIH1//LILRA2//LILRA5//NOD1//STAT3//TLR4
GO:0002764	immune_response-regulating_signaling_pathway	Biological Process	29	590	463	17492	0.00108156	0.0304628	2.96595	1.85697	0.062635	ARPC1B//CHUK//CRK//CSK//FCGR3A//FCN1//FER//FOS//HCK//IFIH1//IRF7//LGMN//LILRA2//MAPK9//MNDA//NOD1//PAK1//PIK3CB//PIK3CD//PRKCD//PSMA3//PSMC3//PSMC5//PSMD13//RAF1//TEC//TLR10//TLR4//TNIP2
GO:0033157	regulation_of_intracellular_protein_transport	Biological Process	15	227	463	17492	0.00109377	0.0306118	2.96107	2.49646	0.0323974	BAP1//CAMK1//GDI1//HDAC3//HPCA//IFI27//IWS1//LCP1//PAK1//PKIG//PRKCD//RANGAP1//SEC16A//TP53//UBR5
GO:0050730	regulation_of_peptidyl-tyrosine_phosphorylation	Biological Process	16	253	463	17492	0.00120239	0.03344	2.91995	2.38923	0.0345572	ARHGEF2//BST1//CD74//ENPP2//IL18//LILRA5//LRRK1//NEDD9//OSM//PARP9//PRKCD//PTK2B//SEMA4D//STAT3//TEC//TP53
GO:0030149	sphingolipid_catabolic_process	Biological Process	5	31	463	17492	0.00122326	0.0336318	2.91248	6.0935	0.0107991	ASAH1//GBA2//HEXB//NAGA//PSAP
GO:1904951	positive_regulation_of_establishment_of_protein_localization	Biological Process	24	458	463	17492	0.00122449	0.0336318	2.91204	1.97972	0.0518359	ABCG1//ADAM8//AIM2//BAP1//CAMK1//CASP1//CHUK//F2RL1//FCN1//GLMN//HDAC3//HPCA//IFIH1//KARS//LILRA2//LILRA5//NADK//OSM//PAK1//PRKCD//SEC16A//TLR4//TP53//UBR5
GO:1901653	cellular_response_to_peptide	Biological Process	19	328	463	17492	0.00124174	0.0338948	2.90597	2.18846	0.0410367	ARHGEF2//ATP1A3//ATP6V0E1//ATP6V1D//ATP6V1E1//CRK//CSK//FER//KLF4//LGMN//NAMPT//NOD1//PAK1//PRKCD//RANGAP1//STAT3//STAT6//TLR4//TP53
GO:0098542	defense_response_to_other_organism	Biological Process	41	943	463	17492	0.00126222	0.0342425	2.89887	1.6426	0.0885529	AIM2//APOBEC3B//ARHGEF2//BST2//CASP1//CHUK//CORO1A//F2RL1//FCN1//FLNB//GBP1//HCK//HLA-B//HLA-H//IFI27//IFIH1//IFIT3//IFNGR2//IL18//IRF4//IRF7//IRF8//LILRA2//LILRA5//LYZ//MOV10//NOD1//OAS1//OAS2//OAS3//PARP9//PIK3CD//PRKCD//RAB20//TLR10//TLR4//TP53//TRIM21//TRIM25//TTC4//WRNIP1
GO:0006650	glycerophospholipid_metabolic_process	Biological Process	18	304	463	17492	0.00129467	0.0349086	2.88784	2.23696	0.0388769	CDIPT//CPNE1//ENPP2//FIG4//LPCAT1//LPCAT3//MTMR12//PGS1//PI4KA//PI4KB//PIGN//PIGS//PIK3CB//PIK3CD//PIK3R5//PISD//RUFY1//SACM1L
GO:0043066	negative_regulation_of_apoptotic_process	Biological Process	39	886	463	17492	0.00132261	0.0354461	2.87857	1.66299	0.0842333	ADAM8//API5//ARAF//ARHGEF2//BCL6//CARD16//CBX4//CD74//CFDP1//CORO1A//DNAJA1//DNMT1//GNAI2//GRN//HCK//HDAC3//IFIT3//IL2RB//IRF7//KLF4//LGMN//NOTCH1//PLAUR//PRDX3//PRKCD//PTK2B//PTRH2//QARS//RAF1//RGL2//SEMA4D//STAT3//STK40//TMBIM1//TMBIM4//TNIP2//TP53//TSC22D3//UNG
GO:0043254	regulation_of_protein_complex_assembly	Biological Process	23	435	463	17492	0.00136748	0.0359538	2.86408	1.99755	0.049676	AIM2//ARHGEF2//ARPC1B//CORO1A//FER//GBA2//GMFG//HCFC1//HCK//LCP1//MAPK9//PAK1//PEX5//PRKCD//PSMC3//PSMC5//PTK2B//RAF1//RDX//SUMO1//TLR4//TMSB4Y//TP53
GO:0042088	T-helper_1_type_immune_response	Biological Process	4	19	463	17492	0.00136918	0.0359538	2.86354	7.95362	0.00863931	IL18//SEMA4A//STAT6//TLR4
GO:0050702	interleukin-1_beta_secretion	Biological Process	3	9	463	17492	0.00137408	0.0359538	2.86199	12.5932	0.00647948	AIM2//F2RL1//TLR4
GO:0060700	regulation_of_ribonuclease_activity	Biological Process	3	9	463	17492	0.00137408	0.0359538	2.86199	12.5932	0.00647948	OAS1//OAS2//OAS3
GO:0033674	positive_regulation_of_kinase_activity	Biological Process	28	572	463	17492	0.00139347	0.0362466	2.8559	1.84936	0.0604752	ADAM8//CAB39//CAMK1//CD74//CRK//CSK//DAG1//GADD45A//IL18//KARS//LILRA5//LPAR1//MAP2K1//MAP3K8//MAPKAP1//NEDD9//NOD1//PAK1//PIK3CB//PIK3R5//PKN1//PRKAG1//PRKCD//PTK2B//RAF1//RAP1A//RASSF2//TLR4
GO:0071396	cellular_response_to_lipid	Biological Process	26	517	463	17492	0.00140245	0.0362668	2.85311	1.89995	0.0561555	ATP1A1//ATP1A3//CALCOCO1//CARD16//CARD17//CASP1//CBX3//DAG1//DDX5//DNAJA1//ELK1//GRAMD1A//HCK//IL18//IRF8//KLF4//LPAR1//MSTN//NPC1//PTK2B//RXRB//TLR4//TNFRSF1B//TNIP2//UBR5//WBP2
GO:0051085	chaperone_cofactor-dependent_protein_refolding	Biological Process	5	32	463	17492	0.00141867	0.0362726	2.84812	5.90308	0.0107991	CD74//DNAJB4//HSPE1//TOR1A//TOR1B
GO:0032872	regulation_of_stress-activated_MAPK_cascade	Biological Process	15	233	463	17492	0.00141908	0.0362726	2.84799	2.43217	0.0323974	DNAJA1//EDAR//F2RL1//GADD45A//HDAC3//KARS//LTBR//MAP2K1//NOD1//PAK1//PKN1//PTK2B//QARS//RASSF2//TLR4
GO:0048525	negative_regulation_of_viral_process	Biological Process	9	101	463	17492	0.00143246	0.0364043	2.84392	3.36651	0.0194384	APOBEC3B//BST2//FCN1//OAS1//OAS2//OAS3//PSMC3//TRIM21//TRIM25
GO:0043122	regulation_of_I-kappaB_kinase|NF-kappaB_signaling	Biological Process	15	234	463	17492	0.00148048	0.0374097	2.8296	2.42178	0.0323974	BST2//CANT1//CARD16//CASP1//CD74//CHUK//CPNE1//EDAR//F2RL1//LPAR1//LTBR//NOD1//TLR4//TNIP2//TRIM25
GO:0042326	negative_regulation_of_phosphorylation	Biological Process	23	438	463	17492	0.00149535	0.0375706	2.82526	1.98387	0.049676	CAMK2N2//CSK//DAG1//DNAJA1//F2RL1//GADD45A//GBP1//GMFG//HDAC3//KLF4//LRRK1//MSTN//PKIG//PKN1//PRDX3//PRKCD//QARS//RASSF2//RGS2//SEMA4D//STAT3//STK38//TLR4
GO:0009615	response_to_virus	Biological Process	17	284	463	17492	0.0015549	0.0388462	2.8083	2.26146	0.0367171	APOBEC3B//BST2//CHUK//F2RL1//GBP1//IFI27//IFIH1//IFIT3//IFNGR2//IRF7//MOV10//OAS1//OAS2//OAS3//PARP9//TRIM25//TTC4
GO:0051091	positive_regulation_of_DNA-binding_transcription_factor_activity	Biological Process	16	260	463	17492	0.00159451	0.0395522	2.79737	2.3249	0.0345572	ADAM8//AIM2//ARHGEF2//CARD16//CHUK//CRTC3//FER//FLOT1//IL18//NOD1//PRDX3//SMARCB1//STAT3//TLR4//TRIM21//TRIM25
GO:0070302	regulation_of_stress-activated_protein_kinase_signaling_cascade	Biological Process	15	236	463	17492	0.00160999	0.0395522	2.79318	2.40125	0.0323974	DNAJA1//EDAR//F2RL1//GADD45A//HDAC3//KARS//LTBR//MAP2K1//NOD1//PAK1//PKN1//PTK2B//QARS//RASSF2//TLR4
GO:0071356	cellular_response_to_tumor_necrosis_factor	Biological Process	15	236	463	17492	0.00160999	0.0395522	2.79318	2.40125	0.0323974	AIM2//ARHGEF2//ASAH1//CHUK//EDAR//GBP1//KARS//LTBR//PSMA3//PSMC3//PSMC5//PSMD13//PTK2B//TNFRSF1B//TNFSF13
GO:2000778	positive_regulation_of_interleukin-6_secretion	Biological Process	5	33	463	17492	0.00163613	0.0398294	2.78618	5.7242	0.0107991	F2RL1//IFIH1//LILRA2//LILRA5//TLR4
GO:0071902	positive_regulation_of_protein_serine|threonine_kinase_activity	Biological Process	19	336	463	17492	0.00163929	0.0398294	2.78534	2.13635	0.0410367	ADAM8//CAB39//CAMK1//CD74//CRK//CSK//GADD45A//KARS//LPAR1//MAP2K1//MAP3K8//NOD1//PAK1//PIK3CB//PIK3R5//PKN1//PTK2B//RAF1//TLR4
GO:0043409	negative_regulation_of_MAPK_cascade	Biological Process	12	167	463	17492	0.0016644	0.0402184	2.77874	2.71471	0.0259179	CSK//DAG1//DNAJA1//F2RL1//GBP1//HDAC3//KLF4//PRKCD//QARS//RGS2//STK38//TLR4
GO:0002360	T_cell_lineage_commitment	Biological Process	4	20	463	17492	0.00167601	0.0402214	2.77572	7.55594	0.00863931	IRF4//STAT3//STAT6//TP53
GO:0016032	viral_process	Biological Process	32	693	463	17492	0.00168271	0.0402214	2.77399	1.74452	0.0691145	AP2M1//COPS7B//CRTC3//DAG1//DOCK2//HCFC1//HCK//IFI27//IFIH1//IL2RB//IRF7//KARS//LTBR//NPC1//NUP210//NUP93//PI4KA//PSMA3//PSMC3//PTBP1//PVR//RPL36A//SMARCB1//STAT3//SUMO1//TAF5//TP53//TRIM25//UBR5//UNG//UVRAG//XRCC4
GO:0034641	cellular_nitrogen_compound_metabolic_process	Biological Process	116	3407	463	17492	0.00169386	0.0402701	2.77112	1.28631	0.25054	ACSM3//ADPGK//APOBEC3B//ARID4A//ASAH1//ATXN3//AXIN2//BAZ2A//BTD//CDIPT//CHERP//CNP//COPS7B//CORIN//CPOX//CPSF1//CROT//DDX42//DDX5//DEDD2//DHX29//DHX38//DNA2//DNMT1//ECE1//EDC4//EEF2//EIF2S1//ENPP2//EXTL2//FOS//FOXK1//GADD45A//GBA2//GFPT2//GNPDA1//GSPT1//GTF2E2//GUCY1B2//HABP4//HEXB//HNRNPA2B1//HORMAD1//INTS5//IRF7//IWS1//JMJD6//KARS//KLF4//MDN1//MOV10//MRPS23//NADK//NAGA//NAMPT//NFRKB//NOTCH1//NR…
GO:0006139	nucleobase-containing_compound_metabolic_process	Biological Process	97	2764	463	17492	0.00177359	0.0419402	2.75115	1.32584	0.209503	ACSM3//ADPGK//APOBEC3B//ARID4A//ATXN3//AXIN2//BAZ2A//CDIPT//CHERP//CNP//COPS7B//CPSF1//CROT//DDX42//DDX5//DEDD2//DHX38//DNA2//DNMT1//EDC4//ENPP2//EXTL2//FOS//FOXK1//GADD45A//GFPT2//GNPDA1//GSPT1//GTF2E2//GUCY1B2//HABP4//HNRNPA2B1//HORMAD1//INTS5//IRF7//IWS1//JMJD6//KARS//KLF4//MDN1//MOV10//NADK//NAMPT//NFRKB//NOTCH1//NRBF2//NRBP1//OAS2//OAS3//PABPC4//PANK4//PARG//PARP9//PDE8A//PHRF1//PRMT5//PRPF1…
GO:0050718	positive_regulation_of_interleukin-1_beta_secretion	Biological Process	5	34	463	17492	0.00187709	0.0440873	2.72652	5.55584	0.0107991	AIM2//CASP1//LILRA2//LILRA5//TLR4
GO:0002295	T-helper_cell_lineage_commitment	Biological Process	3	10	463	17492	0.00192456	0.0440873	2.71567	11.3339	0.00647948	IRF4//STAT3//STAT6
GO:0045899	positive_regulation_of_RNA_polymerase_II_transcriptional_preinitiation_complex_assembly	Biological Process	3	10	463	17492	0.00192456	0.0440873	2.71567	11.3339	0.00647948	PSMC3//PSMC5//TP53
GO:1903800	positive_regulation_of_production_of_miRNAs_involved_in_gene_silencing_by_miRNA	Biological Process	3	10	463	17492	0.00192456	0.0440873	2.71567	11.3339	0.00647948	DDX5//MAP2K1//TP53
GO:2001214	positive_regulation_of_vasculogenesis	Biological Process	3	10	463	17492	0.00192456	0.0440873	2.71567	11.3339	0.00647948	ADM//HIF1AN//RAP1A
GO:0010035	response_to_inorganic_substance	Biological Process	26	529	463	17492	0.00192991	0.0440873	2.71446	1.85685	0.0561555	ANKZF1//BAP1//CHUK//CPNE1//CPNE2//CPOX//CRK//EEF2//EIF2S1//FOS//GDI1//HPCA//KLF4//LGMN//MAPK9//MCOLN1//NPC1//PKD2L1//PRDX3//PRKCD//PTK2B//STAT6//SUMO1//TP53//TXNIP//XRCC4
GO:0046488	phosphatidylinositol_metabolic_process	Biological Process	12	170	463	17492	0.00193418	0.0440873	2.7135	2.6668	0.0259179	CDIPT//FIG4//MTMR12//PI4KA//PI4KB//PIGN//PIGS//PIK3CB//PIK3CD//PIK3R5//RUFY1//SACM1L
GO:0002718	regulation_of_cytokine_production_involved_in_immune_response	Biological Process	8	86	463	17492	0.00198037	0.0449088	2.70325	3.51439	0.0172786	BCL6//BST2//CD74//F2RL1//IL18//KARS//TLR4//TNFRSF1B
GO:0046822	regulation_of_nucleocytoplasmic_transport	Biological Process	9	106	463	17492	0.00200671	0.0452739	2.69752	3.20771	0.0194384	CAMK1//HDAC3//IFI27//IWS1//PKIG//PRKCD//RANGAP1//TP53//UBR5
GO:0051707	response_to_other_organism	Biological Process	52	1306	463	17492	0.00204258	0.0455596	2.68982	1.50425	0.112311	ADM//AIM2//APOBEC3B//ARHGEF2//BST2//CARD16//CARD17//CASP1//CHUK//CNP//CORO1A//CRK//F2RL1//FCN1//FER//FLNB//FOS//GBP1//HCK//HLA-B//HLA-H//IFI27//IFIH1//IFIT3//IFNGR2//IL18//IRF4//IRF7//IRF8//LILRA2//LILRA5//LYZ//MOV10//NOD1//NOTCH1//OAS1//OAS2//OAS3//PARP9//PIK3CD//PRDX3//PRKCD//RAB20//TLR10//TLR4//TNFRSF1B//TNIP2//TP53//TRIM21//TRIM25//TTC4//WRNIP1
GO:0035166	post-embryonic_hemopoiesis	Biological Process	2	3	463	17492	0.00206059	0.0455596	2.68601	25.1865	0.00431965	KLF4//MYO1E
GO:0039530	MDA-5_signaling_pathway	Biological Process	2	3	463	17492	0.00206059	0.0455596	2.68601	25.1865	0.00431965	IFIH1//IRF7
GO:1905702	regulation_of_inhibitory_synapse_assembly	Biological Process	2	3	463	17492	0.00206059	0.0455596	2.68601	25.1865	0.00431965	SEMA4A//SEMA4D
GO:0043207	response_to_external_biotic_stimulus	Biological Process	52	1308	463	17492	0.00210929	0.0464043	2.67586	1.50195	0.112311	ADM//AIM2//APOBEC3B//ARHGEF2//BST2//CARD16//CARD17//CASP1//CHUK//CNP//CORO1A//CRK//F2RL1//FCN1//FER//FLNB//FOS//GBP1//HCK//HLA-B//HLA-H//IFI27//IFIH1//IFIT3//IFNGR2//IL18//IRF4//IRF7//IRF8//LILRA2//LILRA5//LYZ//MOV10//NOD1//NOTCH1//OAS1//OAS2//OAS3//PARP9//PIK3CD//PRDX3//PRKCD//RAB20//TLR10//TLR4//TNFRSF1B//TNIP2//TP53//TRIM21//TRIM25//TTC4//WRNIP1
GO:0014068	positive_regulation_of_phosphatidylinositol_3-kinase_signaling	Biological Process	8	87	463	17492	0.00213163	0.046453	2.67129	3.474	0.0172786	F2RL1//IL18//OSM//PIK3CB//PIK3CD//PIK3R5//RGL2//SEMA4D
GO:0046466	membrane_lipid_catabolic_process	Biological Process	5	35	463	17492	0.00214302	0.046453	2.66897	5.3971	0.0107991	ASAH1//GBA2//HEXB//NAGA//PSAP
GO:0071709	membrane_assembly	Biological Process	5	35	463	17492	0.00214302	0.046453	2.66897	5.3971	0.0107991	FLOT1//NLGN3//NLGN4Y//PACSIN2//PSAP
GO:0070646	protein_modification_by_small_protein_removal	Biological Process	17	294	463	17492	0.00224033	0.0483256	2.64969	2.18454	0.0367171	ATXN3//BAP1//COPS7B//FOXK1//HCFC1//IFIH1//NFRKB//PSMA3//PSMC3//PSMC5//PSMD13//TADA2B//TNIP2//TOR1A//TP53//USP22//USP5
GO:0009636	response_to_toxic_substance	Biological Process	25	508	463	17492	0.00230058	0.0493844	2.63816	1.85924	0.0539957	ANKZF1//CHRNA2//CHUK//CNP//CPOX//CRK//EEF2//EPHX1//FOS//GRIN3A//HPCA//ITPR2//KLF4//MSTN//PRDX3//PRKCD//PTK2B//RGS2//SDF4//SLC15A2//STAT3//STAT6//TP53//TXNIP//TXNRD1
GO:0031579	membrane_raft_organization	Biological Process	4	22	463	17492	0.00242681	0.0515931	2.61496	6.86904	0.00863931	DOCK2//FLOT1//NPC1//PACSIN2
GO:1903077	negative_regulation_of_protein_localization_to_plasma_membrane	Biological Process	4	22	463	17492	0.00242681	0.0515931	2.61496	6.86904	0.00863931	AP2M1//CSK//GBP1//TMBIM1
GO:0006048	UDP-N-acetylglucosamine_biosynthetic_process	Biological Process	3	11	463	17492	0.00259455	0.0546338	2.58594	10.3036	0.00647948	GFPT2//GNPDA1//UAP1
GO:0050701	interleukin-1_secretion	Biological Process	3	11	463	17492	0.00259455	0.0546338	2.58594	10.3036	0.00647948	AIM2//F2RL1//TLR4
GO:0043547	positive_regulation_of_GTPase_activity	Biological Process	21	405	463	17492	0.00274101	0.057209	2.56209	1.95895	0.0453564	ARFGAP2//ARHGAP15//ARHGAP30//CRK//DOCK2//DOCK9//F2RL1//GDI1//IQSEC1//NEDD9//PKP4//PTK2B//RANGAP1//RAP1A//RASA3//RGS2//RIC8B//RIN2//SEC23B//SEMA4D//TBC1D22B
GO:0009225	nucleotide-sugar_metabolic_process	Biological Process	5	37	463	17492	0.00275566	0.057209	2.55977	5.10536	0.0107991	EXTL2//GFPT2//GNPDA1//PARG//UAP1
GO:0051084	'de_novo'_posttranslational_protein_folding	Biological Process	5	37	463	17492	0.00275566	0.057209	2.55977	5.10536	0.0107991	CD74//DNAJB4//HSPE1//TOR1A//TOR1B
GO:0008610	lipid_biosynthetic_process	Biological Process	27	572	463	17492	0.00280217	0.0579028	2.55251	1.78331	0.0583153	ACSM3//ALDH1A3//ALOX5//ASAH1//CD74//CDIPT//CNBP//CPNE1//CYP27A1//FIG4//HEXB//LPCAT1//LPCAT3//MTMR12//PGS1//PI4KA//PI4KB//PIGN//PIGS//PIK3CB//PIK3CD//PIK3R5//PISD//PRKAB1//PRKAG1//RUFY1//SACM1L
GO:0050708	regulation_of_protein_secretion	Biological Process	23	461	463	17492	0.00286203	0.0583586	2.54333	1.88489	0.049676	ABCG1//ADAM8//AIM2//CARD16//CARD17//CASP1//CHUK//F2RL1//FCN1//GBP1//GLMN//HMGN3//IFIH1//ITPR2//KARS//LILRA2//LILRA5//NADK//OSM//RAP1A//TLR10//TLR4//TNFRSF1B
GO:0032727	positive_regulation_of_interferon-alpha_production	Biological Process	4	23	463	17492	0.00287702	0.0583586	2.54106	6.57038	0.00863931	CHUK//IFIH1//IRF7//TLR4
GO:0043951	negative_regulation_of_cAMP-mediated_signaling	Biological Process	4	23	463	17492	0.00287702	0.0583586	2.54106	6.57038	0.00863931	CRTC3//GNAI2//LPAR1//RGS2
GO:2000637	positive_regulation_of_gene_silencing_by_miRNA	Biological Process	4	23	463	17492	0.00287702	0.0583586	2.54106	6.57038	0.00863931	DDX5//MAP2K1//STAT3//TP53
GO:0051270	regulation_of_cellular_component_movement	Biological Process	41	989	463	17492	0.0030051	0.0605183	2.52214	1.5662	0.0885529	AAMP//ADAM8//ARHGEF2//ATP1A1//BCL6//BST1//BST2//CCDC65//CD74//CORO1A//CRK//DAG1//ENPP2//F2RL1//FER//FERMT3//FGF16//GNAI2//GRN//IQSEC1//KARS//KLF4//LGMN//LPAR1//MSTN//NEDD9//NOTCH1//PAK1//PIK3CD//PKN1//PLXNB2//PTK2B//RAF1//RDX//RNF20//SEMA4A//SEMA4D//STAT3//SUMO1//TMSB4Y//TP53
GO:0030217	T_cell_differentiation	Biological Process	10	134	463	17492	0.00301086	0.0605183	2.52131	2.81938	0.0215983	CD74//DNAJA3//DOCK2//IRF4//JMJD6//PIK3CD//SEMA4A//STAT3//STAT6//TP53
GO:0120035	regulation_of_plasma_membrane_bounded_cell_projection_organization	Biological Process	31	691	463	17492	0.00305627	0.0610007	2.51481	1.69489	0.0669546	CAMK1//CRK//DYNC2LI1//ENPP2//F2RL1//FER//FIG4//GDI1//GORASP1//GRN//IFRD1//KLF4//LLPH//LPAR1//MAP2K1//MAP4//MNS1//MOV10//MSTN//NLGN3//PAK1//PLXNB2//PRKCD//PTK2B//RAP1A//RDX//RGS2//SEMA4A//SEMA4D//SERPINI1//TBC1D22B
GO:0010506	regulation_of_autophagy	Biological Process	18	329	463	17492	0.00306245	0.0610007	2.51393	2.06697	0.0388769	ATP6V0E1//ATP6V1D//ATP6V1E1//DAP//FOXK1//NAMPT//NOD1//NPC1//PIK3CB//PRKAB1//PRKAG1//PSAP//RRAGD//SESN3//STAT3//TP53//TRIM21//UVRAG
GO:0046825	regulation_of_protein_export_from_nucleus	Biological Process	5	38	463	17492	0.00310534	0.0612895	2.50789	4.97101	0.0107991	CAMK1//IFI27//IWS1//RANGAP1//TP53
GO:0032870	cellular_response_to_hormone_stimulus	Biological Process	28	605	463	17492	0.00311227	0.0612895	2.50692	1.74848	0.0604752	ATP1A1//ATP1A3//ATP6V0E1//ATP6V1D//ATP6V1E1//CALCOCO1//CBX3//CRK//CSK//DDX5//DNAJA1//ELK1//FER//FOS//GNAI2//MSTN//NAMPT//NOTCH1//NPC1//PAK1//PRKCD//RANGAP1//RDX//RXRB//STAT3//STAT6//UBR5//WBP2
GO:0045184	establishment_of_protein_localization	Biological Process	60	1588	463	17492	0.00311853	0.0612895	2.50605	1.42744	0.12959	ABCG1//AIM2//AKTIP//AP2M1//ARFGAP2//ARHGEF2//ATP6V0E1//ATP6V1D//ATP6V1E1//CD74//CETN3//CPSF1//CROT//CTAGE1//DHX38//DYNC2LI1//F2RL1//GDI1//GLE1//GORASP1//HNRNPA2B1//HOMER3//IFT52//MCOLN1//MOAP1//NASP//NOTCH1//NPC1//NUP210//NUP93//PEX5//RAB20//RAF1//RDX//RPAIN//RPL36A//RUFY1//SEC16A//SEC23B//SEC24C//SLC15A2//SNAP23//SNAP29//SNX27//SRP68//STAT3//STX11//STX3//TBC1D22B//TERF2//THOC1//TLR4//TNPO3//TOR1…
GO:0031100	animal_organ_regeneration	Biological Process	7	73	463	17492	0.00314785	0.061592	2.50199	3.62271	0.0151188	ADM//IGF2R//LCP1//NOTCH1//PRMT5//RAP1A//UPF2
GO:0046677	response_to_antibiotic	Biological Process	17	304	463	17492	0.0031623	0.0616021	2.5	2.11268	0.0367171	ANKZF1//CHUK//CRK//EEF2//GRIN3A//ITPR2//KLF4//MSTN//PRDX3//PRKCD//PTK2B//RGS2//SDF4//STAT3//STAT6//TP53//TXNIP
GO:0051252	regulation_of_RNA_metabolic_process	Biological Process	123	3713	463	17492	0.00319746	0.0620139	2.49519	1.25152	0.265659	ADAM8//AIM2//ARHGEF2//ARID4A//AXIN2//BAP1//BAZ1B//BAZ2A//BCL6//BRMS1//C9orf78//CALCOCO1//CAMK1//CARD16//CBX3//CBX4//CD74//CHD4//CHUK//CLK2//CNBP//CRK//CRTC3//DAP//DDX5//DEDD2//DNAJA3//DNMT1//ELK1//EWSR1//F2RL1//FER//FLOT1//FOS//FOXK1//HABP4//HCFC1//HCK//HDAC3//HEXB//HIF1AN//HMGN3//HNRNPA2B1//HNRNPAB//IFI27//IL18//IRF4//IRF7//IRF8//IWS1//JMJD6//KARS//KLF4//MAP2K1//MAPK9//MOV10//MSTN//NAMPT//NOD1//…
GO:0050865	regulation_of_cell_activation	Biological Process	29	636	463	17492	0.00327099	0.063163	2.48532	1.72266	0.062635	ADAM8//BCL6//BST1//CD74//CORO1A//CSK//DNAJA3//F2RL1//FER//FGL2//GLMN//GRN//IL18//IRF4//KARS//LILRA2//LILRA5//MAP3K8//MNDA//PAK1//PKN1//PRKCD//STAT6//TEC//THOC1//TLR4//TNFRSF1B//TNFSF13//TNIP2
GO:0006954	inflammatory_response	Biological Process	24	495	463	17492	0.00337129	0.0648167	2.4722	1.83174	0.0518359	ADAM8//ADM//AIM2//ALOX5//BCL6//CD97//CHUK//F2RL1//FOS//GRN//HCK//IL18//LYZ//NAMPT//NFRKB//NOD1//NOTCH1//PIK3CD//SNAP23//STAT3//TLR10//TLR4//TNFRSF1B//TNIP2
GO:2000379	positive_regulation_of_reactive_oxygen_species_metabolic_process	Biological Process	8	94	463	17492	0.00346114	0.0660905	2.46078	3.21529	0.0172786	F2RL1//GADD45A//GNAI2//KLF4//PRKCD//PTK2B//TLR4//TP53
GO:0045058	T_cell_selection	Biological Process	5	39	463	17492	0.0034859	0.0660905	2.45769	4.84355	0.0107991	CD74//DOCK2//IRF4//STAT3//STAT6
GO:0050716	positive_regulation_of_interleukin-1_secretion	Biological Process	5	39	463	17492	0.0034859	0.0660905	2.45769	4.84355	0.0107991	AIM2//CASP1//LILRA2//LILRA5//TLR4
GO:0006996	organelle_organization	Biological Process	113	3375	463	17492	0.00349733	0.0660905	2.45626	1.26492	0.24406	ACTR1B//AFG3L2//AKTIP//AP2M1//ARFGAP2//ARHGEF2//ARID4A//ARPC1B//ATP6V0E1//ATP6V1D//ATP6V1E1//ATPAF1//ATXN3//AXIN2//BAP1//BAZ1B//BAZ2A//BCL6//BIN2//BRMS1//CAP1//CBX3//CBX4//CCDC65//CETN3//CHD4//CNP//COPS7B//CORO1A//CROT//CYLC1//DAG1//DIAPH2//DNA2//DNAJA3//DNMT1//DOCK2//DYNC2LI1//EIF2S1//EPB41L2//FER//FIG4//FLII//FLNB//GADD45A//GORASP1//GRN//HABP4//HCFC1//HDAC3//HEXB//HMGN3//HNRNPA2B1//HORMAD1//IFT…
GO:0051148	negative_regulation_of_muscle_cell_differentiation	Biological Process	6	56	463	17492	0.00353046	0.0664327	2.45217	4.04782	0.012959	DNMT1//HDAC3//NOTCH1//PAK1//PTBP1//RGS2
GO:0002757	immune_response-activating_signal_transduction	Biological Process	26	555	463	17492	0.00367823	0.0686997	2.43436	1.76986	0.0561555	ARPC1B//CHUK//CRK//CSK//FCGR3A//FCN1//HCK//IFIH1//IRF7//LGMN//LILRA2//MNDA//NOD1//PAK1//PIK3CB//PIK3CD//PRKCD//PSMA3//PSMC3//PSMC5//PSMD13//RAF1//TEC//TLR10//TLR4//TNIP2
GO:0070498	interleukin-1-mediated_signaling_pathway	Biological Process	8	95	463	17492	0.00369425	0.0686997	2.43247	3.18145	0.0172786	CHUK//MAP3K8//NOD1//PSMA3//PSMC3//PSMC5//PSMD13//TNIP2
GO:0031344	regulation_of_cell_projection_organization	Biological Process	31	700	463	17492	0.00369754	0.0686997	2.43209	1.6731	0.0669546	CAMK1//CRK//DYNC2LI1//ENPP2//F2RL1//FER//FIG4//GDI1//GORASP1//GRN//IFRD1//KLF4//LLPH//LPAR1//MAP2K1//MAP4//MNS1//MOV10//MSTN//NLGN3//PAK1//PLXNB2//PRKCD//PTK2B//RAP1A//RDX//RGS2//SEMA4A//SEMA4D//SERPINI1//TBC1D22B
GO:0030522	intracellular_receptor_signaling_pathway	Biological Process	11	161	463	17492	0.00377455	0.069837	2.42314	2.58122	0.0237581	CALCOCO1//DDX5//DNAJA1//FAM120B//IFIH1//IRF7//NOD1//RXRB//STAT3//UBR5//WBP2
GO:0050920	regulation_of_chemotaxis	Biological Process	13	209	463	17492	0.00386525	0.070687	2.41282	2.34993	0.0280778	BST1//CD74//F2RL1//FGF16//KARS//LGMN//LPAR1//MSTN//NOTCH1//PTK2B//SEMA4A//SEMA4D//STX3
GO:0006464	cellular_protein_modification_process	Biological Process	104	3075	463	17492	0.00387156	0.070687	2.41211	1.27775	0.224622	AKTIP//ANAPC7//ARAF//ARID4A//ATXN3//BAP1//BAZ1B//BAZ2A//BRMS1//CAB39//CAMK1//CBX4//CHUK//CLK2//COPS7B//CSF2RA//CSK//DAPP1//EIF2S1//EXTL2//FEM1A//FER//FGF16//FOXK1//GALNT2//GFPT2//GMFG//GORASP1//GSPT1//HCFC1//HCK//HDAC3//HIF1AN//IFI27//IFIH1//IGF2R//IL18//IL2RB//IRF4//JMJD6//KARS//KCTD21//LRRK1//MAP2K1//MAP3K8//MAPK9//MARK3//MAST3//MINPP1//NFRKB//NOD1//NPC1//NRBP1//NUP210//NUP93//PAK1//PARP9//PCMT…
GO:0036211	protein_modification_process	Biological Process	104	3075	463	17492	0.00387156	0.070687	2.41211	1.27775	0.224622	AKTIP//ANAPC7//ARAF//ARID4A//ATXN3//BAP1//BAZ1B//BAZ2A//BRMS1//CAB39//CAMK1//CBX4//CHUK//CLK2//COPS7B//CSF2RA//CSK//DAPP1//EIF2S1//EXTL2//FEM1A//FER//FGF16//FOXK1//GALNT2//GFPT2//GMFG//GORASP1//GSPT1//HCFC1//HCK//HDAC3//HIF1AN//IFI27//IFIH1//IGF2R//IL18//IL2RB//IRF4//JMJD6//KARS//KCTD21//LRRK1//MAP2K1//MAP3K8//MAPK9//MARK3//MAST3//MINPP1//NFRKB//NOD1//NPC1//NRBP1//NUP210//NUP93//PAK1//PARP9//PCMT…
GO:0044091	membrane_biogenesis	Biological Process	5	40	463	17492	0.00389883	0.070687	2.40907	4.72246	0.0107991	FLOT1//NLGN3//NLGN4Y//PACSIN2//PSAP
GO:0046330	positive_regulation_of_JNK_cascade	Biological Process	10	139	463	17492	0.00391622	0.070687	2.40713	2.71796	0.0215983	EDAR//F2RL1//GADD45A//LTBR//NOD1//PAK1//PKN1//PTK2B//RASSF2//TLR4
GO:0042542	response_to_hydrogen_peroxide	Biological Process	9	117	463	17492	0.0039164	0.070687	2.40711	2.90613	0.0194384	ANKZF1//CRK//EEF2//KLF4//PRDX3//PRKCD//PTK2B//STAT6//TXNIP
GO:0002819	regulation_of_adaptive_immune_response	Biological Process	11	162	463	17492	0.00395598	0.0711112	2.40275	2.56529	0.0237581	BCL6//HLA-B//HLA-H//IL18//IRF7//PKN1//PVR//STAT6//THOC1//TNFRSF1B//TNFSF13
GO:0046328	regulation_of_JNK_cascade	Biological Process	12	186	463	17492	0.00404466	0.0716172	2.39312	2.4374	0.0259179	DNAJA1//EDAR//F2RL1//GADD45A//HDAC3//LTBR//NOD1//PAK1//PKN1//PTK2B//RASSF2//TLR4
GO:0003332	negative_regulation_of_extracellular_matrix_constituent_secretion	Biological Process	2	4	463	17492	0.00404891	0.0716172	2.39266	18.8898	0.00431965	NOTCH1//TNFRSF1B
GO:0033031	positive_regulation_of_neutrophil_apoptotic_process	Biological Process	2	4	463	17492	0.00404891	0.0716172	2.39266	18.8898	0.00431965	PIK3CB//PIK3CD
GO:0043137	DNA_replication,_removal_of_RNA_primer	Biological Process	2	4	463	17492	0.00404891	0.0716172	2.39266	18.8898	0.00431965	DNA2//RNASEH1
GO:0034599	cellular_response_to_oxidative_stress	Biological Process	14	235	463	17492	0.00407665	0.0717315	2.3897	2.25071	0.0302376	ANKZF1//CHUK//CRK//EIF2S1//FER//FOS//KLF4//MAPK9//NCF4//PRDX3//PRKCD//STAT6//TP53//TXNRD1
GO:0043086	negative_regulation_of_catalytic_activity	Biological Process	34	794	463	17492	0.00408782	0.0717315	2.38851	1.61777	0.0734341	BST2//CAMK2N2//CARD16//CARD17//CSK//DNAJA1//GADD45A//GLMN//GMFG//GNAI2//HPCA//KLF4//MSTN//NOTCH1//PARP9//PDE6D//PKIG//PKN1//PLAUR//PPP1R15A//PRDX3//PRKCD//QARS//RAF1//RDX//RGS2//RNH1//SEMA4D//SERPINI1//STK38//TERF2//TMBIM1//TP53//TXNIP
GO:0009612	response_to_mechanical_stimulus	Biological Process	13	211	463	17492	0.00418831	0.0732044	2.37796	2.32766	0.0280778	ATP1A1//CASP1//DAG1//FOS//GADD45A//HABP4//LTBR//PKD2L1//PTK2B//RAF1//TLR4//TXNIP//XPC
GO:0061418	regulation_of_transcription_from_RNA_polymerase_II_promoter_in_response_to_hypoxia	Biological Process	7	77	463	17492	0.00424632	0.0736698	2.37199	3.43452	0.0151188	HIF1AN//NOTCH1//PSMA3//PSMC3//PSMC5//PSMD13//TP53
GO:0060341	regulation_of_cellular_localization	Biological Process	34	796	463	17492	0.00424826	0.0736698	2.37179	1.61371	0.0734341	AP2M1//BAP1//CAMK1//CORO1A//CSK//DAG1//DNAJA1//EPB41L2//FER//GBP1//GDI1//HDAC3//HMGN3//HPCA//IFI27//IWS1//LCP1//MAP2K1//NADK//NLGN3//PAK1//PARP9//PKIG//PRKCD//PTK2B//RANGAP1//RAP1A//RDX//SEC16A//STX3//TMBIM1//TOR1A//TP53//UBR5
GO:0002363	alpha-beta_T_cell_lineage_commitment	Biological Process	3	13	463	17492	0.00432349	0.074269	2.36417	8.71839	0.00647948	IRF4//STAT3//STAT6
GO:0032675	regulation_of_interleukin-6_production	Biological Process	10	141	463	17492	0.00433361	0.074269	2.36315	2.67941	0.0215983	ARHGEF2//CD74//CSK//F2RL1//IFIH1//LILRA2//LILRA5//NOD1//STAT3//TLR4
GO:0006458	'de_novo'_protein_folding	Biological Process	5	41	463	17492	0.00434559	0.074269	2.36195	4.60728	0.0107991	CD74//DNAJB4//HSPE1//TOR1A//TOR1B
GO:0034612	response_to_tumor_necrosis_factor	Biological Process	15	262	463	17492	0.00434999	0.074269	2.36151	2.16296	0.0323974	AIM2//ARHGEF2//ASAH1//CHUK//EDAR//GBP1//KARS//LTBR//PSMA3//PSMC3//PSMC5//PSMD13//PTK2B//TNFRSF1B//TNFSF13
GO:0045069	regulation_of_viral_genome_replication	Biological Process	8	98	463	17492	0.00446695	0.0759725	2.34999	3.08406	0.0172786	APOBEC3B//BST2//DDX5//IFI27//NOTCH1//OAS1//OAS2//OAS3
GO:0006970	response_to_osmotic_stress	Biological Process	7	78	463	17492	0.00456135	0.0770124	2.34091	3.39049	0.0151188	ARHGEF2//CAB39//PAPPA2//PKN1//PTK2B//TP53//TSC22D3
GO:0010614	negative_regulation_of_cardiac_muscle_hypertrophy	Biological Process	4	26	463	17492	0.00456292	0.0770124	2.34076	5.81226	0.00863931	NOTCH1//PAK1//RGS2//TNFRSF1B
GO:0006403	RNA_localization	Biological Process	13	214	463	17492	0.00471347	0.0789506	2.32666	2.29503	0.0280778	CETN3//CPSF1//DHX38//FLOT1//GLE1//HNRNPA2B1//IWS1//NUP210//NUP93//PRPF18//TERF2//THOC1//UPF2
GO:0042063	gliogenesis	Biological Process	13	214	463	17492	0.00471347	0.0789506	2.32666	2.29503	0.0280778	CNP//CSK//DAG1//EEF2//GRN//HEXB//LPAR1//MAP2K1//NLGN3//NOTCH1//PTK2B//STAT3//TLR4
GO:0032874	positive_regulation_of_stress-activated_MAPK_cascade	Biological Process	11	166	463	17492	0.00475251	0.0793041	2.32308	2.50347	0.0237581	EDAR//F2RL1//GADD45A//KARS//LTBR//NOD1//PAK1//PKN1//PTK2B//RASSF2//TLR4
GO:0071260	cellular_response_to_mechanical_stimulus	Biological Process	7	79	463	17492	0.0048937	0.0813532	2.31036	3.34757	0.0151188	ATP1A1//CASP1//DAG1//GADD45A//HABP4//LTBR//TLR4
GO:0050658	RNA_transport	Biological Process	12	191	463	17492	0.00499275	0.0826889	2.30166	2.37359	0.0259179	CETN3//CPSF1//DHX38//FLOT1//GLE1//HNRNPA2B1//IWS1//NUP210//NUP93//TERF2//THOC1//UPF2
GO:0044267	cellular_protein_metabolic_process	Biological Process	121	3693	463	17492	0.00508168	0.0838477	2.29399	1.23784	0.261339	AFG3L2//AKTIP//ANAPC7//ANKZF1//AP2M1//ARAF//ARID4A//ATXN3//BAP1//BAZ1B//BAZ2A//BRMS1//CAB39//CAMK1//CBX4//CHUK//CLK2//COPS7B//CPVL//CSF2RA//CSK//CTSO//DAPP1//DHX29//EEF2//EIF2S1//EXTL2//FEM1A//FER//FGF16//FOXK1//GALNT2//GFPT2//GMFG//GORASP1//GSPT1//HCFC1//HCK//HDAC3//HEXB//HIF1AN//IFI27//IFIH1//IGF2R//IL18//IL2RB//IRF4//JMJD6//KARS//KCTD21//LGMN//LRRK1//LYZ//MAP2K1//MAP3K8//MAPK9//MARK3//MAST3//M…
GO:0001933	negative_regulation_of_protein_phosphorylation	Biological Process	20	400	463	17492	0.00511194	0.0840335	2.29141	1.88898	0.0431965	CAMK2N2//CSK//DAG1//DNAJA1//F2RL1//GADD45A//GBP1//GMFG//HDAC3//KLF4//LRRK1//PKIG//PKN1//PRKCD//QARS//RASSF2//RGS2//SEMA4D//STK38//TLR4
GO:0014066	regulation_of_phosphatidylinositol_3-kinase_signaling	Biological Process	9	122	463	17492	0.00515551	0.0844357	2.28773	2.78703	0.0194384	F2RL1//IL18//KLF4//OSM//PIK3CB//PIK3CD//PIK3R5//RGL2//SEMA4D
GO:0070304	positive_regulation_of_stress-activated_protein_kinase_signaling_cascade	Biological Process	11	168	463	17492	0.00519583	0.0847822	2.28434	2.47367	0.0237581	EDAR//F2RL1//GADD45A//KARS//LTBR//NOD1//PAK1//PKN1//PTK2B//RASSF2//TLR4
GO:0042093	T-helper_cell_differentiation	Biological Process	4	27	463	17492	0.00524621	0.0852895	2.28015	5.59699	0.00863931	IRF4//SEMA4A//STAT3//STAT6
GO:0006644	phospholipid_metabolic_process	Biological Process	19	374	463	17492	0.00530622	0.085385	2.27522	1.91929	0.0410367	CDIPT//CPNE1//ENPP2//FIG4//HEXB//LPCAT1//LPCAT3//MTMR12//PGS1//PI4KA//PI4KB//PIGN//PIGS//PIK3CB//PIK3CD//PIK3R5//PISD//RUFY1//SACM1L
GO:0090382	phagosome_maturation	Biological Process	5	43	463	17492	0.0053465	0.085385	2.27193	4.39299	0.0107991	ATP6V0E1//ATP6V1D//ATP6V1E1//CORO1A//RAB20
GO:0036092	phosphatidylinositol-3-phosphate_biosynthetic_process	Biological Process	3	14	463	17492	0.00539551	0.085385	2.26797	8.09565	0.00647948	FIG4//PIK3CB//PIK3CD
GO:0042089	cytokine_biosynthetic_process	Biological Process	3	14	463	17492	0.00539551	0.085385	2.26797	8.09565	0.00647948	IL18//IRF7//NOD1
GO:0043369	CD4-positive_or_CD8-positive,_alpha-beta_T_cell_lineage_commitment	Biological Process	3	14	463	17492	0.00539551	0.085385	2.26797	8.09565	0.00647948	IRF4//STAT3//STAT6
GO:0045898	regulation_of_RNA_polymerase_II_transcriptional_preinitiation_complex_assembly	Biological Process	3	14	463	17492	0.00539551	0.085385	2.26797	8.09565	0.00647948	PSMC3//PSMC5//TP53
GO:2001212	regulation_of_vasculogenesis	Biological Process	3	14	463	17492	0.00539551	0.085385	2.26797	8.09565	0.00647948	ADM//HIF1AN//RAP1A
GO:0030888	regulation_of_B_cell_proliferation	Biological Process	6	61	463	17492	0.00540656	0.085385	2.26708	3.71604	0.012959	BCL6//BST1//CD74//MNDA//PKN1//TLR4
GO:0032386	regulation_of_intracellular_transport	Biological Process	18	349	463	17492	0.00563622	0.0886953	2.24901	1.94852	0.0388769	BAP1//CAMK1//FER//GDI1//HDAC3//HPCA//IFI27//IWS1//LCP1//MAP2K1//PAK1//PKIG//PRKCD//RANGAP1//RDX//SEC16A//TP53//UBR5
GO:0015031	protein_transport	Biological Process	56	1505	463	17492	0.0058552	0.0916996	2.23246	1.40576	0.12095	ABCG1//AIM2//AKTIP//AP2M1//ARFGAP2//ARHGEF2//ATP6V0E1//ATP6V1D//ATP6V1E1//CD74//CETN3//CPSF1//CROT//CTAGE1//DHX38//DYNC2LI1//F2RL1//GDI1//GLE1//GORASP1//HNRNPA2B1//HOMER3//IFT52//MCOLN1//NASP//NOTCH1//NUP210//NUP93//PEX5//RAB20//RAF1//RPAIN//RPL36A//RUFY1//SEC16A//SEC23B//SEC24C//SLC15A2//SNAP23//SNAP29//SNX27//SRP68//STAT3//STX11//STX3//TBC1D22B//TERF2//THOC1//TLR4//TNPO3//TOR1A//TP53//TXNIP//UB…
GO:0030334	regulation_of_cell_migration	Biological Process	35	844	463	17492	0.00590728	0.0916996	2.22861	1.56669	0.075594	AAMP//ADAM8//ARHGEF2//BST1//BST2//CD74//CORO1A//CRK//DAG1//ENPP2//F2RL1//FER//FERMT3//FGF16//GNAI2//GRN//IQSEC1//KARS//KLF4//LGMN//LPAR1//MSTN//NEDD9//NOTCH1//PAK1//PIK3CD//PLXNB2//PTK2B//RDX//RNF20//SEMA4A//SEMA4D//STAT3//TMSB4Y//TP53
GO:0061024	membrane_organization	Biological Process	35	844	463	17492	0.00590728	0.0916996	2.22861	1.56669	0.075594	ABCB1//AFG3L2//AP2M1//ARFGAP2//BIN2//CNP//DNAJA3//DOCK2//FLOT1//GBA2//GORASP1//IGF2R//MOAP1//NLGN3//NLGN4Y//NPC1//NUP93//PACSIN2//PI4KA//PRKCD//PSAP//RAB20//SEC16A//SEC23B//SEC24C//SNAP23//SNAP29//STAT3//STX11//STX3//TMEM43//TOR1A//TOR1B//TP53//UVRAG
GO:0050714	positive_regulation_of_protein_secretion	Biological Process	15	271	463	17492	0.00591008	0.0916996	2.22841	2.09113	0.0323974	ABCG1//ADAM8//AIM2//CASP1//CHUK//F2RL1//FCN1//GLMN//IFIH1//KARS//LILRA2//LILRA5//NADK//OSM//TLR4
GO:0022604	regulation_of_cell_morphogenesis	Biological Process	23	490	463	17492	0.00596687	0.0920437	2.22425	1.77333	0.049676	ARHGAP15//CFDP1//CORO1A//CRK//DAG1//ENPP2//GBP1//GDI1//GORASP1//HCK//HEXB//IFRD1//LPAR1//MAP2K1//MOV10//NEDD9//NLGN3//PAK1//PLXNB2//PTK2B//RDX//SEMA4A//SEMA4D
GO:0090383	phagosome_acidification	Biological Process	4	28	463	17492	0.00599471	0.0920437	2.22223	5.3971	0.00863931	ATP6V0E1//ATP6V1D//ATP6V1E1//RAB20
GO:2000108	positive_regulation_of_leukocyte_apoptotic_process	Biological Process	4	28	463	17492	0.00599471	0.0920437	2.22223	5.3971	0.00863931	ADAM8//PIK3CB//PIK3CD//TP53
GO:0016241	regulation_of_macroautophagy	Biological Process	11	172	463	17492	0.00618029	0.0942387	2.20899	2.41614	0.0237581	ATP6V0E1//ATP6V1D//ATP6V1E1//NOD1//NPC1//PRKAB1//PRKAG1//RRAGD//SESN3//TP53//UVRAG
GO:0038095	Fc-epsilon_receptor_signaling_pathway	Biological Process	11	172	463	17492	0.00618029	0.0942387	2.20899	2.41614	0.0237581	CHUK//FER//FOS//MAPK9//PAK1//PIK3CB//PSMA3//PSMC3//PSMC5//PSMD13//TEC
GO:2000145	regulation_of_cell_motility	Biological Process	37	908	463	17492	0.00620486	0.0942841	2.20727	1.53948	0.0799136	AAMP//ADAM8//ARHGEF2//BST1//BST2//CD74//CORO1A//CRK//DAG1//ENPP2//F2RL1//FER//FERMT3//FGF16//GNAI2//GRN//IQSEC1//KARS//KLF4//LGMN//LPAR1//MSTN//NEDD9//NOTCH1//PAK1//PIK3CD//PKN1//PLXNB2//PTK2B//RAF1//RDX//RNF20//SEMA4A//SEMA4D//STAT3//TMSB4Y//TP53
GO:0030162	regulation_of_proteolysis	Biological Process	31	726	463	17492	0.00622591	0.0942841	2.2058	1.61318	0.0669546	ADAM8//AIM2//ARAF//ATXN3//BST2//CARD16//CARD17//CASP1//CIDEB//DAP//GLMN//GRN//HSPE1//IFT52//KARS//KLF4//LGMN//MAPK9//NOD1//PLAUR//PRDX3//PSMA3//PTK2B//RAF1//SERPINI1//STAT3//SUMO1//TNFRSF1B//TP53//TRIM21//USP5
GO:0006725	cellular_aromatic_compound_metabolic_process	Biological Process	100	2987	463	17492	0.00631525	0.0953107	2.19961	1.2648	0.215983	ACSM3//ADPGK//APOBEC3B//ARID4A//ATXN3//AXIN2//BAZ2A//CDIPT//CHERP//CNP//COPS7B//CPOX//CPSF1//CROT//DDX42//DDX5//DEDD2//DHX38//DNA2//DNMT1//EDC4//ENPP2//EPHX1//EXTL2//FOS//FOXK1//GADD45A//GFPT2//GNPDA1//GSPT1//GTF2E2//GUCY1B2//HABP4//HNRNPA2B1//HORMAD1//INTS5//IRF7//IWS1//JMJD6//KARS//KLF4//MDN1//MOV10//NADK//NAMPT//NFRKB//NOTCH1//NRBF2//NRBP1//OAS2//OAS3//PABPC4//PANK4//PARG//PARP9//PDE8A//PHRF1/…
GO:0031056	regulation_of_histone_modification	Biological Process	10	149	463	17492	0.00636528	0.095739	2.19618	2.53555	0.0215983	BCL6//CAMK1//DNMT1//IWS1//RNF20//SMARCB1//TADA2B//TP53//UBR5//WBP2
GO:0016540	protein_autoprocessing	Biological Process	3	15	463	17492	0.00661328	0.0967606	2.17958	7.55594	0.00647948	AFG3L2//CASP1//PISD
GO:0032611	interleukin-1_beta_production	Biological Process	3	15	463	17492	0.00661328	0.0967606	2.17958	7.55594	0.00647948	AIM2//F2RL1//TLR4
GO:0042107	cytokine_metabolic_process	Biological Process	3	15	463	17492	0.00661328	0.0967606	2.17958	7.55594	0.00647948	IL18//IRF7//NOD1
GO:0032613	interleukin-10_production	Biological Process	2	5	463	17492	0.00663013	0.0967606	2.17848	15.1119	0.00431965	F2RL1//PRKCD
GO:0043504	mitochondrial_DNA_repair	Biological Process	2	5	463	17492	0.00663013	0.0967606	2.17848	15.1119	0.00431965	DNA2//TP53
GO:0045829	negative_regulation_of_isotype_switching	Biological Process	2	5	463	17492	0.00663013	0.0967606	2.17848	15.1119	0.00431965	BCL6//THOC1
GO:0070245	positive_regulation_of_thymocyte_apoptotic_process	Biological Process	2	5	463	17492	0.00663013	0.0967606	2.17848	15.1119	0.00431965	ADAM8//TP53
GO:1902339	positive_regulation_of_apoptotic_process_involved_in_morphogenesis	Biological Process	2	5	463	17492	0.00663013	0.0967606	2.17848	15.1119	0.00431965	NOTCH1//TNFRSF1B
GO:1903416	response_to_glycoside	Biological Process	2	5	463	17492	0.00663013	0.0967606	2.17848	15.1119	0.00431965	ATP1A1//ATP1A3
GO:0002520	immune_system_development	Biological Process	28	641	463	17492	0.00678014	0.0986242	2.16876	1.65028	0.0604752	ARID4A//BCL6//CD74//DNAJA3//DOCK2//EEF2//F2RL1//GAB3//IRF4//IRF8//JMJD6//KLF4//LRRK1//LTBR//MAP2K1//MYO1E//PABPC4//PIK3CD//PKN1//PRDX3//PTK2B//RAF1//SEMA4A//STAT3//STAT6//TP53//UNG//XRCC4
GO:1901698	response_to_nitrogen_compound	Biological Process	42	1070	463	17492	0.0069154	0.100262	2.16018	1.48294	0.0907127	ADM//ANKZF1//ARHGEF2//ATP1A3//ATP6V0E1//ATP6V1D//ATP6V1E1//ATXN3//CHUK//CRK//CSK//DAG1//DNMT1//EEF2//FER//FLOT1//FOS//GNAI2//HPCA//IFIH1//ITPR2//KBTBD2//KLF4//LGMN//NAMPT//NOD1//NOTCH1//NPC1//PAK1//PRKCD//PTK2B//RANGAP1//RAP1A//RGS2//RRAGD//SESN3//STAT3//STAT6//TLR4//TOR1A//TP53//TRIM25
GO:0007568	aging	Biological Process	15	276	463	17492	0.00695489	0.100505	2.15771	2.05324	0.0323974	ADM//CNP//DAG1//DNAJA3//EEF2//EIF2S1//FOS//MAP2K1//NAMPT//PRKCD//RPN2//STAT3//TERF2//TNFRSF1B//TP53
GO:0016579	protein_deubiquitination	Biological Process	15	277	463	17492	0.00718062	0.103429	2.14384	2.04583	0.0323974	ATXN3//BAP1//FOXK1//HCFC1//IFIH1//NFRKB//PSMA3//PSMC3//PSMC5//PSMD13//TADA2B//TNIP2//TP53//USP22//USP5
GO:0016925	protein_sumoylation	Biological Process	6	65	463	17492	0.00736463	0.105735	2.13285	3.48736	0.012959	CBX4//IFIH1//NUP210//NUP93//RANGAP1//SUMO1
GO:0019538	protein_metabolic_process	Biological Process	136	4267	463	17492	0.00748714	0.107146	2.12568	1.20413	0.293737	ABCG1//ADAM8//AFG3L2//AKTIP//ANAPC7//ANKZF1//AP2M1//ARAF//ARID4A//ATXN3//BAP1//BAZ1B//BAZ2A//BRMS1//CAB39//CAMK1//CANT1//CASP1//CBX4//CHUK//CIDEB//CLK2//COPS7B//CORIN//CPNE1//CPVL//CSF2RA//CSK//CTSO//DAG1//DAPP1//DHX29//ECE1//EEF2//EIF2S1//EXTL2//FEM1A//FER//FGF16//FGL2//FOXK1//GALNT2//GFPT2//GMFG//GORASP1//GSPT1//HCFC1//HCK//HDAC3//HEXB//HIF1AN//IFI27//IFIH1//IGF2R//IL18//IL2RB//IRF4//IRF7//JMJD…
GO:0051028	mRNA_transport	Biological Process	10	153	463	17492	0.00762563	0.108776	2.11772	2.46926	0.0215983	CETN3//CPSF1//DHX38//GLE1//HNRNPA2B1//IWS1//NUP210//NUP93//THOC1//UPF2
GO:0046596	regulation_of_viral_entry_into_host_cell	Biological Process	4	30	463	17492	0.00769753	0.109098	2.11365	5.03729	0.00863931	CD74//FCN1//TRIM21//TRIM25
GO:0090200	positive_regulation_of_release_of_cytochrome_c_from_mitochondria	Biological Process	4	30	463	17492	0.00769753	0.109098	2.11365	5.03729	0.00863931	CIDEB//MOAP1//PLAUR//TP53
GO:0033077	T_cell_differentiation_in_thymus	Biological Process	5	47	463	17492	0.00781791	0.10995	2.10691	4.01912	0.0107991	CD74//DNAJA3//DOCK2//JMJD6//TP53
GO:0051452	intracellular_pH_reduction	Biological Process	5	47	463	17492	0.00781791	0.10995	2.10691	4.01912	0.0107991	ATP6V0E1//ATP6V1D//ATP6V1E1//GRN//RAB20
GO:0032147	activation_of_protein_kinase_activity	Biological Process	18	361	463	17492	0.00788862	0.10995	2.103	1.88375	0.0388769	CAB39//CD74//CRK//GADD45A//IL18//KARS//LPAR1//MAP2K1//MAP3K8//MAPKAP1//NOD1//PAK1//PIK3CB//PKN1//PRKCD//PTK2B//RAF1//TLR4
GO:0002683	negative_regulation_of_immune_system_process	Biological Process	21	445	463	17492	0.00792051	0.10995	2.10125	1.78286	0.0453564	BCL6//BST2//CD74//CRK//F2RL1//FER//FGL2//GBP1//GLMN//GRN//IRF4//LILRA2//MNDA//NOTCH1//PKN1//PTK2B//STAT6//THOC1//TLR4//TRAFD1//TSC22D3
GO:0006406	mRNA_export_from_nucleus	Biological Process	8	108	463	17492	0.00796211	0.10995	2.09897	2.7985	0.0172786	CPSF1//DHX38//GLE1//HNRNPA2B1//NUP210//NUP93//THOC1//UPF2
GO:0002532	production_of_molecular_mediator_involved_in_inflammatory_response	Biological Process	3	16	463	17492	0.00798142	0.10995	2.09792	7.08369	0.00647948	ALOX5//SNAP23//TLR4
GO:0002739	regulation_of_cytokine_secretion_involved_in_immune_response	Biological Process	3	16	463	17492	0.00798142	0.10995	2.09792	7.08369	0.00647948	F2RL1//KARS//TNFRSF1B
GO:0006047	UDP-N-acetylglucosamine_metabolic_process	Biological Process	3	16	463	17492	0.00798142	0.10995	2.09792	7.08369	0.00647948	GFPT2//GNPDA1//UAP1
GO:2000484	positive_regulation_of_interleukin-8_secretion	Biological Process	3	16	463	17492	0.00798142	0.10995	2.09792	7.08369	0.00647948	F2RL1//FCN1//TLR4
GO:0002768	immune_response-regulating_cell_surface_receptor_signaling_pathway	Biological Process	22	475	463	17492	0.00820776	0.112395	2.08578	1.7498	0.0475162	ARPC1B//CHUK//CRK//CSK//FCGR3A//FCN1//FER//FOS//HCK//LILRA2//MAPK9//MNDA//PAK1//PIK3CB//PIK3CD//PRKCD//PSMA3//PSMC3//PSMC5//PSMD13//RAF1//TEC
GO:0010243	response_to_organonitrogen_compound	Biological Process	39	987	463	17492	0.00820979	0.112395	2.08567	1.49281	0.0842333	ADM//ANKZF1//ARHGEF2//ATP1A3//ATP6V0E1//ATP6V1D//ATP6V1E1//ATXN3//CHUK//CRK//CSK//DAG1//DNMT1//EEF2//FER//FOS//HPCA//ITPR2//KBTBD2//KLF4//LGMN//NAMPT//NOD1//NOTCH1//NPC1//PAK1//PRKCD//PTK2B//RANGAP1//RAP1A//RGS2//RRAGD//SESN3//STAT3//STAT6//TLR4//TOR1A//TP53//TRIM25
GO:0051453	regulation_of_intracellular_pH	Biological Process	7	87	463	17492	0.00824607	0.112544	2.08375	3.03975	0.0151188	ATP6V0E1//ATP6V1D//ATP6V1E1//GRN//RAB20//SLC4A2//TP53
GO:0015833	peptide_transport	Biological Process	56	1533	463	17492	0.0084304	0.114705	2.07415	1.38008	0.12095	ABCG1//AIM2//AKTIP//AP2M1//ARFGAP2//ARHGEF2//ATP6V0E1//ATP6V1D//ATP6V1E1//CD74//CETN3//CPSF1//CROT//CTAGE1//DHX38//DYNC2LI1//F2RL1//GDI1//GLE1//GORASP1//HNRNPA2B1//HOMER3//IFT52//MCOLN1//NASP//NOTCH1//NUP210//NUP93//PEX5//RAB20//RAF1//RPAIN//RPL36A//RUFY1//SEC16A//SEC23B//SEC24C//SLC15A2//SNAP23//SNAP29//SNX27//SRP68//STAT3//STX11//STX3//TBC1D22B//TERF2//THOC1//TLR4//TNPO3//TOR1A//TP53//TXNIP//UB…
GO:0002221	pattern_recognition_receptor_signaling_pathway	Biological Process	9	132	463	17492	0.00852612	0.114913	2.06925	2.57589	0.0194384	CHUK//FCN1//IFIH1//IRF7//LGMN//NOD1//TLR10//TLR4//TNIP2
GO:0045471	response_to_ethanol	Biological Process	9	132	463	17492	0.00852612	0.114913	2.06925	2.57589	0.0194384	EEF2//GRIN3A//ITPR2//MSTN//PTK2B//RGS2//SDF4//STAT3//TP53
GO:0002253	activation_of_immune_response	Biological Process	27	623	463	17492	0.00857296	0.114913	2.06687	1.63732	0.0583153	AIM2//ARPC1B//CHUK//CRK//CSK//FCGR3A//FCN1//HCK//IFIH1//IRF7//LGMN//LILRA2//MNDA//NOD1//PAK1//PIK3CB//PIK3CD//PRKCD//PSMA3//PSMC3//PSMC5//PSMD13//RAF1//TEC//TLR10//TLR4//TNIP2
GO:0008064	regulation_of_actin_polymerization_or_depolymerization	Biological Process	11	180	463	17492	0.00858488	0.114913	2.06627	2.30876	0.0237581	ARPC1B//CORO1A//F2RL1//FER//GBA2//GMFG//HCK//PRKCD//PTK2B//RDX//TMSB4Y
GO:1901796	regulation_of_signal_transduction_by_p53_class_mediator	Biological Process	11	180	463	17492	0.00858488	0.114913	2.06627	2.30876	0.0237581	CD74//CHD4//DDX5//DNA2//PRKAB1//PRKAG1//PRMT5//TAF4B//TAF5//TP53//TTC5
GO:0002828	regulation_of_type_2_immune_response	Biological Process	4	31	463	17492	0.00865668	0.114913	2.06265	4.8748	0.00863931	BCL6//CD74//IL18//STAT6
GO:0032728	positive_regulation_of_interferon-beta_production	Biological Process	4	31	463	17492	0.00865668	0.114913	2.06265	4.8748	0.00863931	FLOT1//IFIH1//IRF7//TLR4
GO:0038083	peptidyl-tyrosine_autophosphorylation	Biological Process	4	31	463	17492	0.00865668	0.114913	2.06265	4.8748	0.00863931	FER//HCK//PTK2B//TEC
GO:0009968	negative_regulation_of_signal_transduction	Biological Process	47	1244	463	17492	0.00867954	0.114913	2.0615	1.42737	0.101512	ADM//ARHGEF2//AXIN2//BCL6//CARD16//CD74//CPNE1//CRTC3//CSK//DAG1//DNAJA1//F2RL1//GBP1//GNAI2//HDAC3//HIF1AN//HOMER3//IRF4//KCTD21//KLF4//LGMN//LILRA2//LPAR1//MAPKAP1//MARK3//MSTN//NLGN3//NOTCH1//PHF14//PLAUR//PPP1R15A//PRKCD//PSMA3//PSMC3//PSMC5//PSMD13//QARS//RAF1//RASA3//RASSF2//RGS2//SESN3//STK38//TLR4//TMBIM1//TP53//ZNF366
GO:0030832	regulation_of_actin_filament_length	Biological Process	11	181	463	17492	0.00893028	0.11788	2.04913	2.296	0.0237581	ARPC1B//CORO1A//F2RL1//FER//GBA2//GMFG//HCK//PRKCD//PTK2B//RDX//TMSB4Y
GO:0018108	peptidyl-tyrosine_phosphorylation	Biological Process	10	157	463	17492	0.00907041	0.119096	2.04237	2.40635	0.0215983	BAZ1B//CLK2//CSK//FER//HCK//IGF2R//MAP2K1//PRKCD//PTK2B//TEC
GO:0042110	T_cell_activation	Biological Process	13	232	463	17492	0.00907747	0.119096	2.04204	2.11697	0.0280778	CD74//DNAJA3//DOCK2//F2RL1//FGL2//IRF4//JMJD6//LCP1//PIK3CD//SEMA4A//STAT3//STAT6//TP53
GO:0023057	negative_regulation_of_signaling	Biological Process	50	1344	463	17492	0.0091032	0.119096	2.04081	1.40549	0.107991	ADM//ARHGEF2//AXIN2//BCL6//CARD16//CD74//CPNE1//CRTC3//CSK//DAG1//DNAJA1//F2RL1//GBP1//GNAI2//HDAC3//HIF1AN//HOMER3//IRF4//KCTD21//KLF4//LGMN//LILRA2//LPAR1//MAPKAP1//MARK3//MSTN//NLGN3//NOTCH1//OSM//PHF14//PLAUR//PPP1R15A//PRKCD//PSMA3//PSMC3//PSMC5//PSMD13//PTK2B//QARS//RAF1//RAP1A//RASA3//RASSF2//RGS2//SESN3//STK38//TLR4//TMBIM1//TP53//ZNF366
GO:0034121	regulation_of_toll-like_receptor_signaling_pathway	Biological Process	6	68	463	17492	0.00913641	0.119147	2.03922	3.3335	0.012959	F2RL1//FLOT1//IRF4//IRF7//LILRA2//TLR4
GO:0050727	regulation_of_inflammatory_response	Biological Process	17	339	463	17492	0.00916099	0.119147	2.03806	1.89456	0.0367171	ADAM8//BAP1//BCL6//BST1//CASP1//FEM1A//GRN//HCK//IL18//KARS//KLF4//LILRA5//OSM//PRKCD//TLR10//TLR4//TNFRSF1B
GO:0009266	response_to_temperature_stimulus	Biological Process	11	182	463	17492	0.00928633	0.120385	2.03216	2.28339	0.0237581	ADM//ATXN3//DNAJA1//DNAJA3//DNAJB4//EIF2S1//FGF16//FOS//MSTN//SUMO1//TP53
GO:0045851	pH_reduction	Biological Process	5	49	463	17492	0.00931061	0.120385	2.03102	3.85507	0.0107991	ATP6V0E1//ATP6V1D//ATP6V1E1//GRN//RAB20
GO:0006677	glycosylceramide_metabolic_process	Biological Process	3	17	463	17492	0.00950386	0.121335	2.0221	6.66701	0.00647948	GBA2//NAGA//PSAP
GO:0045414	regulation_of_interleukin-8_biosynthetic_process	Biological Process	3	17	463	17492	0.00950386	0.121335	2.0221	6.66701	0.00647948	CD74//KLF4//TLR4
GO:2000269	regulation_of_fibroblast_apoptotic_process	Biological Process	3	17	463	17492	0.00950386	0.121335	2.0221	6.66701	0.00647948	API5//CFDP1//TP53
GO:0002292	T_cell_differentiation_involved_in_immune_response	Biological Process	4	32	463	17492	0.00969068	0.121335	2.01365	4.72246	0.00863931	IRF4//SEMA4A//STAT3//STAT6
GO:0050869	negative_regulation_of_B_cell_activation	Biological Process	4	32	463	17492	0.00969068	0.121335	2.01365	4.72246	0.00863931	BCL6//MNDA//PKN1//THOC1
GO:0090398	cellular_senescence	Biological Process	4	32	463	17492	0.00969068	0.121335	2.01365	4.72246	0.00863931	MAP2K1//PRKCD//TERF2//TP53
GO:0038203	TORC2_signaling	Biological Process	2	6	463	17492	0.0097716	0.121335	2.01003	12.5932	0.00431965	MAPKAP1//SESN3
GO:0039528	cytoplasmic_pattern_recognition_receptor_signaling_pathway_in_response_to_virus	Biological Process	2	6	463	17492	0.0097716	0.121335	2.01003	12.5932	0.00431965	IFIH1//IRF7
GO:0044854	plasma_membrane_raft_assembly	Biological Process	2	6	463	17492	0.0097716	0.121335	2.01003	12.5932	0.00431965	FLOT1//PACSIN2
GO:0050904	diapedesis	Biological Process	2	6	463	17492	0.0097716	0.121335	2.01003	12.5932	0.00431965	CRK//FER
GO:0061419	positive_regulation_of_transcription_from_RNA_polymerase_II_promoter_in_response_to_hypoxia	Biological Process	2	6	463	17492	0.0097716	0.121335	2.01003	12.5932	0.00431965	NOTCH1//TP53
GO:0072540	T-helper_17_cell_lineage_commitment	Biological Process	2	6	463	17492	0.0097716	0.121335	2.01003	12.5932	0.00431965	IRF4//STAT3
GO:1901264	carbohydrate_derivative_transport	Biological Process	6	69	463	17492	0.00978931	0.121335	2.00925	3.28519	0.012959	ABCG1//PSAP//SLC25A41//SLC35A5//SLC35B3//SLC35D2
GO:0050921	positive_regulation_of_chemotaxis	Biological Process	9	135	463	17492	0.0098067	0.121335	2.00848	2.51865	0.0194384	CD74//F2RL1//FGF16//KARS//LGMN//LPAR1//MSTN//PTK2B//STX3
GO:0002223	stimulatory_C-type_lectin_receptor_signaling_pathway	Biological Process	8	112	463	17492	0.00982312	0.121335	2.00775	2.69855	0.0172786	CHUK//PAK1//PRKCD//PSMA3//PSMC3//PSMC5//PSMD13//RAF1
GO:0003014	renal_system_process	Biological Process	8	112	463	17492	0.00982312	0.121335	2.00775	2.69855	0.0172786	ADM//CYP4F12//F2RL1//GNAI2//LGMN//MYO1E//PKN1//PSAP
GO:0032535	regulation_of_cellular_component_size	Biological Process	18	370	463	17492	0.010015	0.12308	1.99935	1.83793	0.0388769	AP2M1//ARPC1B//CORO1A//F2RL1//FER//GBA2//GDI1//GMFG//HCK//IFRD1//PAK1//PPP1R15A//PRKCD//PTK2B//RDX//SEMA4A//SEMA4D//TMSB4Y
GO:0097305	response_to_alcohol	Biological Process	13	235	463	17492	0.010042	0.12308	1.99818	2.08994	0.0280778	DAG1//EEF2//FOS//GRAMD1A//GRIN3A//ITPR2//KLF4//MSTN//PTK2B//RGS2//SDF4//STAT3//TP53
GO:0051051	negative_regulation_of_transport	Biological Process	22	484	463	17492	0.0100782	0.12308	1.99662	1.71726	0.0475162	BST2//CAB39//CARD16//CARD17//CD74//CORO1A//CSK//F2RL1//GBP1//GDI1//GNAI2//LILRA5//NOTCH1//OSM//PACSIN2//PKIG//PTK2B//RANGAP1//RAP1A//RGS2//SUMO1//TNFRSF1B
GO:0001961	positive_regulation_of_cytokine-mediated_signaling_pathway	Biological Process	5	50	463	17492	0.0101259	0.12308	1.99457	3.77797	0.0107991	CASP1//CD74//CPNE1//IRF7//PARP9
GO:0042116	macrophage_activation	Biological Process	5	50	463	17492	0.0101259	0.12308	1.99457	3.77797	0.0107991	CRTC3//GRN//JMJD6//NAMPT//TLR4
GO:0010628	positive_regulation_of_gene_expression	Biological Process	69	1979	463	17492	0.0101314	0.12308	1.99433	1.31723	0.149028	ADAM8//ARHGEF2//ARID4A//AXIN2//BAZ1B//CALCOCO1//CAMK1//CD74//CHUK//CNBP//CRTC3//DDX5//DHX29//DNMT1//EDAR//EEF2//ELK1//F2RL1//FOS//FOXK1//HABP4//HCFC1//HDAC3//HEXB//HMGN3//HNRNPAB//IL18//IRF4//IRF7//IRF8//JMJD6//KARS//KLF4//MAP2K1//MAPK9//MOV10//MSTN//NAMPT//NGRN//NOTCH1//OSM//PARP9//PIK3CB//PIK3CD//PPP1R15A//PRKAB1//PRKAG1//PSMC3//PSMC5//PTK2B//RAF1//RDX//RNF20//RXRB//SMARCB1//STAT3//STAT6//TAF4B…
GO:0019637	organophosphate_metabolic_process	Biological Process	35	876	463	17492	0.0102134	0.123736	1.99083	1.50946	0.075594	ACSM3//ADPGK//CDIPT//CNP//CPNE1//CROT//ENPP2//FIG4//FOXK1//GFPT2//GUCY1B2//HEXB//KARS//LPCAT1//LPCAT3//MINPP1//MTMR12//NADK//NAMPT//PANK4//PARP9//PDE8A//PGS1//PI4KA//PI4KB//PIGN//PIGS//PIK3CB//PIK3CD//PIK3R5//PISD//RUFY1//SACM1L//SLC35B3//UNG
GO:1903828	negative_regulation_of_cellular_protein_localization	Biological Process	8	113	463	17492	0.010335	0.124539	1.98569	2.67467	0.0172786	AP2M1//CSK//DNAJA1//GBP1//GDI1//PKIG//RANGAP1//TMBIM1
GO:0032496	response_to_lipopolysaccharide	Biological Process	16	316	463	17492	0.0103419	0.124539	1.9854	1.9129	0.0345572	ADM//CARD16//CARD17//CASP1//CHUK//CNP//FER//FOS//HCK//IL18//IRF8//NOTCH1//PRDX3//TLR4//TNFRSF1B//TNIP2
GO:0070372	regulation_of_ERK1_and_ERK2_cascade	Biological Process	15	289	463	17492	0.0103744	0.124539	1.98404	1.96088	0.0323974	CD74//CSK//F2RL1//GBP1//GNAI2//KARS//KLF4//MAP2K1//NOD1//NOTCH1//PDE8A//PRMT5//PTK2B//RAP1A//TLR4
GO:0048534	hematopoietic_or_lymphoid_organ_development	Biological Process	26	603	463	17492	0.0104059	0.124539	1.98272	1.62898	0.0561555	ARID4A//BCL6//CD74//DNAJA3//DOCK2//EEF2//F2RL1//GAB3//IRF4//IRF8//JMJD6//KLF4//LRRK1//LTBR//MAP2K1//MYO1E//PABPC4//PIK3CD//PKN1//PRDX3//PTK2B//RAF1//SEMA4A//STAT3//STAT6//TP53
GO:0071383	cellular_response_to_steroid_hormone_stimulus	Biological Process	11	185	463	17492	0.0104205	0.124539	1.98211	2.24636	0.0237581	ATP1A1//ATP1A3//CALCOCO1//CBX3//DDX5//DNAJA1//MSTN//NPC1//RXRB//UBR5//WBP2
GO:0031324	negative_regulation_of_cellular_metabolic_process	Biological Process	85	2525	463	17492	0.0105516	0.125766	1.97668	1.27179	0.183585	ARID4A//ATP1A1//AXIN2//BAP1//BAZ2A//BCL6//BRMS1//BST2//CAMK2N2//CARD16//CARD17//CBX3//CBX4//CLK2//CNBP//CSK//DAG1//DAP//DDX5//DEDD2//DNAJA1//DNAJA3//DNMT1//EIF2S1//F2RL1//FOXK1//GADD45A//GBP1//GLMN//GMFG//GNAI2//HCFC1//HDAC3//HIF1AN//HNRNPA2B1//HPCA//IFI27//IRF7//IRF8//KLF4//LPCAT1//LRRK1//MOV10//MSTN//NAMPT//NOTCH1//NPC1//PARP9//PBXIP1//PHF14//PKIG//PKN1//PLAUR//POU6F1//PPP1R15A//PRDX3//PRKCD//P…
GO:0014065	phosphatidylinositol_3-kinase_signaling	Biological Process	4	33	463	17492	0.0108017	0.128056	1.96651	4.57936	0.00863931	KBTBD2//PIK3CB//PIK3CD//PIK3R5
GO:0090322	regulation_of_superoxide_metabolic_process	Biological Process	4	33	463	17492	0.0108017	0.128056	1.96651	4.57936	0.00863931	BST1//F2RL1//GNAI2//PRKCD
GO:0002793	positive_regulation_of_peptide_secretion	Biological Process	15	291	463	17492	0.0110013	0.130075	1.95855	1.94741	0.0323974	ABCG1//ADAM8//AIM2//CASP1//CHUK//F2RL1//FCN1//GLMN//IFIH1//KARS//LILRA2//LILRA5//NADK//OSM//TLR4
GO:0031334	positive_regulation_of_protein_complex_assembly	Biological Process	13	238	463	17492	0.0110847	0.130488	1.95528	2.0636	0.0280778	AIM2//ARPC1B//FER//HCK//LCP1//MAPK9//PAK1//PSMC3//PSMC5//PTK2B//SUMO1//TLR4//TP53
GO:0001959	regulation_of_cytokine-mediated_signaling_pathway	Biological Process	10	162	463	17492	0.0111608	0.130488	1.9523	2.33208	0.0215983	CARD16//CASP1//CD74//CHUK//CPNE1//F2RL1//IFNGR2//IRF7//PARP9//SUMO1
GO:0034504	protein_localization_to_nucleus	Biological Process	10	162	463	17492	0.0111608	0.130488	1.9523	2.33208	0.0215983	NUP93//RANGAP1//RPAIN//STAT3//SUMO1//TNPO3//TOR1A//TOR1B//TP53//TXNIP
GO:0071498	cellular_response_to_fluid_shear_stress	Biological Process	3	18	463	17492	0.0111839	0.130488	1.95141	6.29662	0.00647948	HDAC3//KLF4//PTK2B
GO:2000773	negative_regulation_of_cellular_senescence	Biological Process	3	18	463	17492	0.0111839	0.130488	1.95141	6.29662	0.00647948	BCL6//NAMPT//TERF2
GO:0046486	glycerolipid_metabolic_process	Biological Process	18	375	463	17492	0.0113807	0.132435	1.94383	1.81343	0.0388769	CDIPT//CPNE1//ENPP2//FIG4//LPCAT1//LPCAT3//MTMR12//PGS1//PI4KA//PI4KB//PIGN//PIGS//PIK3CB//PIK3CD//PIK3R5//PISD//RUFY1//SACM1L
GO:0051170	import_into_nucleus	Biological Process	8	115	463	17492	0.0114179	0.132519	1.94242	2.62815	0.0172786	NUP93//PRKAG1//RPAIN//SNRPB//STAT3//TNPO3//TP53//TXNIP
GO:0030833	regulation_of_actin_filament_polymerization	Biological Process	10	163	463	17492	0.0116194	0.1343	1.93482	2.31777	0.0215983	ARPC1B//CORO1A//FER//GBA2//GMFG//HCK//PRKCD//PTK2B//RDX//TMSB4Y
GO:1905475	regulation_of_protein_localization_to_membrane	Biological Process	11	188	463	17492	0.0116581	0.1343	1.93337	2.21051	0.0237581	AP2M1//CSK//DAG1//GBP1//GDI1//HPCA//PAK1//RAP1A//STX3//TMBIM1//TP53
GO:0030641	regulation_of_cellular_pH	Biological Process	7	93	463	17492	0.0116928	0.1343	1.93208	2.84363	0.0151188	ATP6V0E1//ATP6V1D//ATP6V1E1//GRN//RAB20//SLC4A2//TP53
GO:0031058	positive_regulation_of_histone_modification	Biological Process	7	93	463	17492	0.0116928	0.1343	1.93208	2.84363	0.0151188	BCL6//DNMT1//RNF20//SMARCB1//TADA2B//TP53//WBP2
GO:0046578	regulation_of_Ras_protein_signal_transduction	Biological Process	13	240	463	17492	0.0118253	0.13547	1.92719	2.0464	0.0280778	ARHGEF2//BCL6//CRK//F2RL1//FLOT1//IQSEC1//LPAR1//MAPKAP1//NOTCH1//RAF1//RASA3//RDX//RGL2
GO:1904375	regulation_of_protein_localization_to_cell_periphery	Biological Process	8	116	463	17492	0.0119896	0.135966	1.9212	2.6055	0.0172786	AP2M1//CSK//DAG1//EPB41L2//GBP1//RAP1A//STX3//TMBIM1
GO:0043367	CD4-positive,_alpha-beta_T_cell_differentiation	Biological Process	4	34	463	17492	0.0119916	0.135966	1.92112	4.44467	0.00863931	IRF4//SEMA4A//STAT3//STAT6
GO:0045191	regulation_of_isotype_switching	Biological Process	4	34	463	17492	0.0119916	0.135966	1.92112	4.44467	0.00863931	BCL6//STAT6//THOC1//TNFSF13
GO:1901031	regulation_of_response_to_reactive_oxygen_species	Biological Process	4	34	463	17492	0.0119916	0.135966	1.92112	4.44467	0.00863931	PDE8A//PSAP//SESN3//TP53
GO:0071248	cellular_response_to_metal_ion	Biological Process	11	190	463	17492	0.0125435	0.141861	1.90158	2.18725	0.0237581	CHUK//CPNE1//CPNE2//EIF2S1//FOS//HPCA//LGMN//MAPK9//MCOLN1//SUMO1//XRCC4
GO:0009408	response_to_heat	Biological Process	8	117	463	17492	0.0125821	0.141934	1.90025	2.58323	0.0172786	ATXN3//DNAJA1//DNAJA3//DNAJB4//EIF2S1//MSTN//SUMO1//TP53
GO:0006906	vesicle_fusion	Biological Process	6	73	463	17492	0.0127345	0.142886	1.89502	3.10518	0.012959	RAB20//SNAP23//SNAP29//STX11//STX3//UVRAG
GO:0043030	regulation_of_macrophage_activation	Biological Process	5	53	463	17492	0.0128622	0.142886	1.89069	3.56412	0.0107991	CD74//GRN//KARS//TLR4//TNIP2
GO:0048708	astrocyte_differentiation	Biological Process	5	53	463	17492	0.0128622	0.142886	1.89069	3.56412	0.0107991	GRN//MAP2K1//NOTCH1//STAT3//TLR4
GO:0032609	interferon-gamma_production	Biological Process	3	19	463	17492	0.0130241	0.142886	1.88525	5.96522	0.00647948	F2RL1//IL18//TLR4
GO:0032930	positive_regulation_of_superoxide_anion_generation	Biological Process	3	19	463	17492	0.0130241	0.142886	1.88525	5.96522	0.00647948	F2RL1//GNAI2//PRKCD
GO:0060261	positive_regulation_of_transcription_initiation_from_RNA_polymerase_II_promoter	Biological Process	3	19	463	17492	0.0130241	0.142886	1.88525	5.96522	0.00647948	PSMC3//PSMC5//TP53
GO:1903798	regulation_of_production_of_miRNAs_involved_in_gene_silencing_by_miRNA	Biological Process	3	19	463	17492	0.0130241	0.142886	1.88525	5.96522	0.00647948	DDX5//MAP2K1//TP53
GO:2001020	regulation_of_response_to_DNA_damage_stimulus	Biological Process	12	217	463	17492	0.0131195	0.142886	1.88208	2.0892	0.0259179	AXIN2//CD74//DDX5//PARG//PARP9//PPP4C//PRKCD//TERF2//THOC1//TP53//UBR5//WRNIP1
GO:2001038	regulation_of_cellular_response_to_drug	Biological Process	4	35	463	17492	0.0132624	0.142886	1.87738	4.31768	0.00863931	PDE8A//PRMT5//PSAP//TP53
GO:0010608	posttranscriptional_regulation_of_gene_expression	Biological Process	24	556	463	17492	0.0133456	0.142886	1.87466	1.63078	0.0518359	AXIN2//CNBP//DHX29//EEF2//EIF2S1//GLE1//GSPT1//HABP4//HNRNPA2B1//MOV10//NGRN//PABPC4//PARP9//PPP1R15A//PRKCD//PSMA3//PSMC3//PSMC5//PSMD13//PTK2B//RGS2//STAT3//TNFRSF1B//TNFSF13
GO:0033673	negative_regulation_of_kinase_activity	Biological Process	13	244	463	17492	0.013421	0.142886	1.87222	2.01285	0.0280778	CAMK2N2//CSK//DNAJA1//GADD45A//GMFG//MSTN//PKIG//PKN1//PRDX3//PRKCD//QARS//RGS2//STK38
GO:0002606	positive_regulation_of_dendritic_cell_antigen_processing_and_presentation	Biological Process	2	7	463	17492	0.013442	0.142886	1.87154	10.7942	0.00431965	CD74//NOD1
GO:0002679	respiratory_burst_involved_in_defense_response	Biological Process	2	7	463	17492	0.013442	0.142886	1.87154	10.7942	0.00431965	HCK//PIK3CD
GO:0030578	PML_body_organization	Biological Process	2	7	463	17492	0.013442	0.142886	1.87154	10.7942	0.00431965	HABP4//SUMO1
GO:0033029	regulation_of_neutrophil_apoptotic_process	Biological Process	2	7	463	17492	0.013442	0.142886	1.87154	10.7942	0.00431965	PIK3CB//PIK3CD
GO:0034141	positive_regulation_of_toll-like_receptor_3_signaling_pathway	Biological Process	2	7	463	17492	0.013442	0.142886	1.87154	10.7942	0.00431965	F2RL1//FLOT1
GO:0035655	interleukin-18-mediated_signaling_pathway	Biological Process	2	7	463	17492	0.013442	0.142886	1.87154	10.7942	0.00431965	ALOX5//IL18
GO:0043654	recognition_of_apoptotic_cell	Biological Process	2	7	463	17492	0.013442	0.142886	1.87154	10.7942	0.00431965	FCN1//JMJD6
GO:0044806	G-quadruplex_DNA_unwinding	Biological Process	2	7	463	17492	0.013442	0.142886	1.87154	10.7942	0.00431965	DNA2//HNRNPA2B1
GO:0051351	positive_regulation_of_ligase_activity	Biological Process	2	7	463	17492	0.013442	0.142886	1.87154	10.7942	0.00431965	MID1IP1//XRCC4
GO:0060013	righting_reflex	Biological Process	2	7	463	17492	0.013442	0.142886	1.87154	10.7942	0.00431965	AFG3L2//ALDH1A3
GO:0071494	cellular_response_to_UV-C	Biological Process	2	7	463	17492	0.013442	0.142886	1.87154	10.7942	0.00431965	CARD16//TP53
GO:2000210	positive_regulation_of_anoikis	Biological Process	2	7	463	17492	0.013442	0.142886	1.87154	10.7942	0.00431965	BRMS1//PTRH2
GO:2000270	negative_regulation_of_fibroblast_apoptotic_process	Biological Process	2	7	463	17492	0.013442	0.142886	1.87154	10.7942	0.00431965	API5//CFDP1
GO:0006974	cellular_response_to_DNA_damage_stimulus	Biological Process	31	769	463	17492	0.0134944	0.143099	1.86985	1.52298	0.0669546	AKTIP//ATXN3//BAZ1B//BCL6//CBX3//CIDEB//COPS7B//DNA2//DNAJA1//GADD45A//IRF7//MNDA//MOAP1//NFRKB//PAK1//PARG//PARP9//PPP1R15A//RPAIN//SUMO1//TERF2//TNFRSF1B//TP53//TRIM25//TTC5//UBR5//UNG//UVRAG//WRNIP1//XPC//XRCC4
GO:0071241	cellular_response_to_inorganic_substance	Biological Process	12	218	463	17492	0.0135637	0.14349	1.86762	2.07962	0.0259179	CHUK//CPNE1//CPNE2//CRK//EIF2S1//FOS//HPCA//LGMN//MAPK9//MCOLN1//SUMO1//XRCC4
GO:0010001	glial_cell_differentiation	Biological Process	10	167	463	17492	0.0135975	0.143504	1.86654	2.26226	0.0215983	CNP//CSK//DAG1//GRN//LPAR1//MAP2K1//NLGN3//NOTCH1//STAT3//TLR4
GO:0050769	positive_regulation_of_neurogenesis	Biological Process	21	469	463	17492	0.0137389	0.144651	1.86205	1.69163	0.0453564	ARHGEF2//BCL6//CAMK1//CPNE1//DAG1//FIG4//GDI1//GRN//LLPH//LPAR1//MAP2K1//NOTCH1//PAK1//PLXNB2//PRMT5//PTK2B//RAP1A//RGS2//SEMA4D//SERPINI1//TNFRSF1B
GO:0031346	positive_regulation_of_cell_projection_organization	Biological Process	18	383	463	17492	0.0138695	0.145049	1.85794	1.77555	0.0388769	CAMK1//ENPP2//F2RL1//FIG4//GDI1//GRN//LLPH//LPAR1//MAP2K1//MNS1//MSTN//PAK1//PLXNB2//PTK2B//RAP1A//RGS2//SEMA4D//SERPINI1
GO:0032970	regulation_of_actin_filament-based_process	Biological Process	18	383	463	17492	0.0138695	0.145049	1.85794	1.77555	0.0388769	ARPC1B//ATP1A1//BST1//BST2//CORO1A//CRK//F2RL1//FER//GBA2//GMFG//HCK//LPAR1//PAK1//PRKCD//PTK2B//RDX//SUMO1//TMSB4Y
GO:0070228	regulation_of_lymphocyte_apoptotic_process	Biological Process	5	54	463	17492	0.0138751	0.145049	1.85776	3.49812	0.0107991	ADAM8//BCL6//CD74//TP53//TSC22D3
GO:0030099	myeloid_cell_differentiation	Biological Process	12	219	463	17492	0.0140193	0.14621	1.85327	2.07012	0.0259179	ARID4A//BCL6//F2RL1//GAB3//IRF4//IRF8//JMJD6//LRRK1//LTBR//PABPC4//PIK3CD//PRDX3
GO:0006979	response_to_oxidative_stress	Biological Process	18	384	463	17492	0.0142085	0.147835	1.84745	1.77092	0.0388769	ANKZF1//CHUK//CRK//EEF2//EIF2S1//FER//FOS//KLF4//MAPK9//NCF4//PRDX3//PRKCD//PTK2B//STAT6//TOR1A//TP53//TXNIP//TXNRD1
GO:0051896	regulation_of_protein_kinase_B_signaling	Biological Process	12	220	463	17492	0.0144864	0.150202	1.83904	2.06071	0.0259179	ADAM8//CPNE1//DAG1//FGF16//IL18//KLF4//MSTN//OSM//PIK3CB//PIK3CD//PIK3R5//SESN3
GO:0050848	regulation_of_calcium-mediated_signaling	Biological Process	7	97	463	17492	0.0145039	0.150202	1.83851	2.72637	0.0151188	BST1//CHERP//GBP1//HOMER3//PTBP1//PTK2B//TMBIM4
GO:0033572	transferrin_transport	Biological Process	4	36	463	17492	0.0146158	0.151007	1.83518	4.19774	0.00863931	ATP6V0E1//ATP6V1D//ATP6V1E1//MCOLN1
GO:0002237	response_to_molecule_of_bacterial_origin	Biological Process	16	329	463	17492	0.0147046	0.151035	1.83255	1.83731	0.0345572	ADM//CARD16//CARD17//CASP1//CHUK//CNP//FER//FOS//HCK//IL18//IRF8//NOTCH1//PRDX3//TLR4//TNFRSF1B//TNIP2
GO:0002521	leukocyte_differentiation	Biological Process	16	329	463	17492	0.0147046	0.151035	1.83255	1.83731	0.0345572	BCL6//CD74//DNAJA3//DOCK2//F2RL1//GAB3//IRF4//JMJD6//LRRK1//LTBR//PIK3CD//PTK2B//SEMA4A//STAT3//STAT6//TP53
GO:0010629	negative_regulation_of_gene_expression	Biological Process	60	1712	463	17492	0.0147209	0.151035	1.83206	1.32405	0.12959	ARID4A//BAP1//BAZ2A//BCL6//BRMS1//CARD16//CBX3//CBX4//CNBP//CPNE1//DAP//DDX5//DEDD2//DNAJA3//DNMT1//EDC4//EIF2S1//FOXK1//GSPT1//HCFC1//HDAC3//HIF1AN//HNRNPA2B1//IFI27//IRF7//IRF8//KLF4//LGMN//MAP2K1//MOV10//NOTCH1//PARP9//PBXIP1//PHF14//PIK3CD//PKIG//POU6F1//PRPF18//PSMC5//PTBP1//PTRH2//QARS//RGS2//RNF20//RNH1//RPL36A//SEMA4D//STAT3//STAT6//SUMO1//TCERG1//TERF2//THAP11//TP53//TXNIP//UPF2//ZNF140/…
GO:0002577	regulation_of_antigen_processing_and_presentation	Biological Process	3	20	463	17492	0.0150267	0.152055	1.82314	5.66695	0.00647948	CD74//FGL2//NOD1
GO:0032495	response_to_muramyl_dipeptide	Biological Process	3	20	463	17492	0.0150267	0.152055	1.82314	5.66695	0.00647948	ARHGEF2//NOD1//NOTCH1
GO:0045730	respiratory_burst	Biological Process	3	20	463	17492	0.0150267	0.152055	1.82314	5.66695	0.00647948	HCK//NCF4//PIK3CD
GO:0051580	regulation_of_neurotransmitter_uptake	Biological Process	3	20	463	17492	0.0150267	0.152055	1.82314	5.66695	0.00647948	FLOT1//RGS2//TOR1A
GO:0062098	regulation_of_programmed_necrotic_cell_death	Biological Process	3	20	463	17492	0.0150267	0.152055	1.82314	5.66695	0.00647948	ARHGEF2//ASAH1//TP53
GO:1904469	positive_regulation_of_tumor_necrosis_factor_secretion	Biological Process	3	20	463	17492	0.0150267	0.152055	1.82314	5.66695	0.00647948	IFIH1//LILRA2//LILRA5
GO:0007050	cell_cycle_arrest	Biological Process	9	145	463	17492	0.0151357	0.152808	1.82	2.34495	0.0194384	CAB39//GADD45A//MAP2K1//NOTCH1//PPP1R15A//PRKAB1//PRKAG1//RRAGD//TP53
GO:0048284	organelle_fusion	Biological Process	7	98	463	17492	0.015276	0.153874	1.81599	2.69855	0.0151188	AFG3L2//RAB20//SNAP23//SNAP29//STX11//STX3//UVRAG
GO:0014070	response_to_organic_cyclic_compound	Biological Process	35	902	463	17492	0.015382	0.154589	1.81299	1.46595	0.075594	ADM//ARPC1B//ATP1A1//ATP1A3//CALCOCO1//CBX3//DAG1//DDX5//DNAJA1//EEF2//ELK1//EPHX1//FLOT1//FOS//GRAMD1A//HCFC1//HPCA//IFIH1//IL18//ITPR2//KLF4//MSTN//NAMPT//NASP//NOTCH1//NPC1//PTK2B//RAP1A//RXRB//STAT3//TP53//TRIM25//TXNIP//UBR5//WBP2
GO:0045862	positive_regulation_of_proteolysis	Biological Process	17	359	463	17492	0.0154285	0.15463	1.81168	1.78901	0.0367171	ADAM8//AIM2//ATXN3//CASP1//CIDEB//DAP//GRN//HSPE1//KARS//LGMN//MAPK9//NOD1//PTK2B//STAT3//SUMO1//TNFRSF1B//USP5
GO:0070663	regulation_of_leukocyte_proliferation	Biological Process	12	222	463	17492	0.015456	0.15463	1.8109	2.04215	0.0259179	BCL6//BST1//BST2//CD74//CORO1A//DNAJA3//GLMN//IL18//MNDA//PKN1//TLR4//TNFRSF1B
GO:0016570	histone_modification	Biological Process	17	360	463	17492	0.0158127	0.157516	1.80099	1.78404	0.0367171	ARID4A//BAP1//BAZ1B//BAZ2A//BRMS1//HCFC1//HDAC3//IRF4//JMJD6//PKN1//PRKCD//PRMT5//RNF20//SETD1B//TADA2B//TAF5//USP22
GO:0016071	mRNA_metabolic_process	Biological Process	28	686	463	17492	0.0158157	0.157516	1.80091	1.54203	0.0604752	CHERP//CPSF1//DDX42//DDX5//DHX38//EDC4//GSPT1//HABP4//HNRNPA2B1//IWS1//JMJD6//MOV10//PHRF1//PRMT5//PRPF18//PTBP1//RBMX2//RNH1//RPL36A//SNRPB//SNRPN//STAT3//THOC1//TP53//TRMT61B//UPF2//WBP4//XRN2
GO:0002720	positive_regulation_of_cytokine_production_involved_in_immune_response	Biological Process	5	56	463	17492	0.016059	0.159222	1.79428	3.37319	0.0107991	CD74//F2RL1//IL18//KARS//TLR4
GO:0035065	regulation_of_histone_acetylation	Biological Process	5	56	463	17492	0.016059	0.159222	1.79428	3.37319	0.0107991	CAMK1//IWS1//SMARCB1//TADA2B//WBP2
GO:0006401	RNA_catabolic_process	Biological Process	13	250	463	17492	0.0161188	0.159457	1.79267	1.96454	0.0280778	DDX5//DEDD2//DNA2//EDC4//GSPT1//OAS2//PABPC4//PRPF18//RNASEH1//RNH1//RPL36A//UPF2//XRN2
GO:0006325	chromatin_organization	Biological Process	28	688	463	17492	0.0163737	0.161617	1.78585	1.53755	0.0604752	ARID4A//BAP1//BAZ1B//BAZ2A//BRMS1//CBX3//CBX4//CHD4//DNMT1//HCFC1//HDAC3//HMGN3//IRF4//JMJD6//NAP1L4//NASP//PAK1//PKN1//PRKCD//PRMT5//RNF20//SETD1B//SMARCB1//SMARCD2//TADA2B//TAF5//TP53//USP22
GO:0050852	T_cell_receptor_signaling_pathway	Biological Process	10	173	463	17492	0.0170242	0.166375	1.76893	2.1838	0.0215983	CHUK//CSK//PAK1//PIK3CB//PIK3CD//PSMA3//PSMC3//PSMC5//PSMD13//TEC
GO:0009058	biosynthetic_process	Biological Process	95	2923	463	17492	0.0170478	0.166375	1.76833	1.22787	0.205184	ACSM3//ALDH18A1//ALDH1A3//ALOX5//ASAH1//BAZ2A//CANT1//CD74//CDIPT//CNBP//CNP//CPNE1//CPOX//CPSF1//CYP27A1//DDX5//DHX29//DNA2//DNAJA3//EEF2//EIF2S1//EXTL2//FIG4//FOS//GALNT2//GFPT2//GNPDA1//GORASP1//GSPT1//GTF2E2//GUCY1B2//HEXB//IL18//INTS5//IRF7//IWS1//KARS//KLF4//LPCAT1//LPCAT3//MRPS23//MTMR12//NADK//NAMPT//NASP//NFRKB//NOD1//NOTCH1//NPC1//NRBF2//NRBP1//PABPC4//PANK4//PARP9//PDE8A//PGS1//PHRF1//…
GO:0050777	negative_regulation_of_immune_response	Biological Process	9	148	463	17492	0.0170861	0.166375	1.76736	2.29741	0.0194384	BCL6//BST2//CRK//FER//FGL2//GRN//STAT6//THOC1//TRAFD1
GO:0051592	response_to_calcium_ion	Biological Process	9	148	463	17492	0.0170861	0.166375	1.76736	2.29741	0.0194384	CPNE1//CPNE2//FOS//GDI1//HPCA//LGMN//MCOLN1//PTK2B//TXNIP
GO:0030029	actin_filament-based_process	Biological Process	24	569	463	17492	0.0171822	0.166375	1.76492	1.59352	0.0518359	ARHGEF2//ARPC1B//ATP1A1//ATXN3//BCL6//CAP1//CORO1A//DIAPH2//DOCK2//EPB41L2//FER//FLII//FLNB//GMFG//IQSEC1//LCP1//MAPKAP1//MYO1E//NEDD9//PACSIN2//PAK1//PARVG//PTK2B//TMSB4Y
GO:0034143	regulation_of_toll-like_receptor_4_signaling_pathway	Biological Process	3	21	463	17492	0.0171933	0.166375	1.76464	5.3971	0.00647948	F2RL1//FLOT1//LILRA2
GO:0051000	positive_regulation_of_nitric-oxide_synthase_activity	Biological Process	3	21	463	17492	0.0171933	0.166375	1.76464	5.3971	0.00647948	NOD1//PTK2B//TERF2
GO:0090312	positive_regulation_of_protein_deacetylation	Biological Process	3	21	463	17492	0.0171933	0.166375	1.76464	5.3971	0.00647948	BCL6//BRMS1//TP53
GO:0048015	phosphatidylinositol-mediated_signaling	Biological Process	6	78	463	17492	0.0172254	0.166375	1.76383	2.90613	0.012959	KBTBD2//PI4KA//PI4KB//PIK3CB//PIK3CD//PIK3R5
GO:0010803	regulation_of_tumor_necrosis_factor-mediated_signaling_pathway	Biological Process	5	57	463	17492	0.017232	0.166375	1.76366	3.31401	0.0107991	CARD16//CASP1//CHUK//CPNE1//F2RL1
GO:0071276	cellular_response_to_cadmium_ion	Biological Process	4	38	463	17492	0.0175766	0.166403	1.75506	3.97681	0.00863931	CHUK//FOS//MAPK9//SUMO1
GO:0002634	regulation_of_germinal_center_formation	Biological Process	2	8	463	17492	0.0176112	0.166403	1.75421	9.44492	0.00431965	BCL6//PKN1
GO:0002741	positive_regulation_of_cytokine_secretion_involved_in_immune_response	Biological Process	2	8	463	17492	0.0176112	0.166403	1.75421	9.44492	0.00431965	F2RL1//KARS
GO:0032637	interleukin-8_production	Biological Process	2	8	463	17492	0.0176112	0.166403	1.75421	9.44492	0.00431965	LILRA2//NOD1
GO:0033034	positive_regulation_of_myeloid_cell_apoptotic_process	Biological Process	2	8	463	17492	0.0176112	0.166403	1.75421	9.44492	0.00431965	PIK3CB//PIK3CD
GO:0034127	regulation_of_MyD88-independent_toll-like_receptor_signaling_pathway	Biological Process	2	8	463	17492	0.0176112	0.166403	1.75421	9.44492	0.00431965	IRF7//TLR4
GO:0044857	plasma_membrane_raft_organization	Biological Process	2	8	463	17492	0.0176112	0.166403	1.75421	9.44492	0.00431965	FLOT1//PACSIN2
GO:0050847	progesterone_receptor_signaling_pathway	Biological Process	2	8	463	17492	0.0176112	0.166403	1.75421	9.44492	0.00431965	UBR5//WBP2
GO:0061614	pri-miRNA_transcription_by_RNA_polymerase_II	Biological Process	2	8	463	17492	0.0176112	0.166403	1.75421	9.44492	0.00431965	DDX5//KLF4
GO:0072539	T-helper_17_cell_differentiation	Biological Process	2	8	463	17492	0.0176112	0.166403	1.75421	9.44492	0.00431965	IRF4//STAT3
GO:0006885	regulation_of_pH	Biological Process	7	101	463	17492	0.0177671	0.167518	1.75038	2.61839	0.0151188	ATP6V0E1//ATP6V1D//ATP6V1E1//GRN//RAB20//SLC4A2//TP53
GO:0006357	regulation_of_transcription_by_RNA_polymerase_II	Biological Process	76	2272	463	17492	0.0178845	0.168266	1.74752	1.26376	0.164147	ARHGEF2//ARID4A//BAZ1B//BCL6//BRMS1//CALCOCO1//CAMK1//CBX4//CHD4//CHUK//CNBP//CRK//CRTC3//DDX5//DNAJA3//DNMT1//ELK1//F2RL1//FOS//FOXK1//HCFC1//HDAC3//HEXB//HIF1AN//HMGN3//HNRNPA2B1//IFI27//IL18//IRF4//IRF7//IRF8//JMJD6//KLF4//NAMPT//NOTCH1//OSM//PARP9//PHF14//PKIG//PKN1//POU6F1//PSMA3//PSMC3//PSMC5//PSMD13//RAF1//RXRB//SEMA4D//SMARCB1//SMARCD2//STAT3//STAT6//SUMO1//TADA2B//TAF4B//TCERG1//TERF2//T…
GO:0008380	RNA_splicing	Biological Process	18	394	463	17492	0.0179686	0.168698	1.74549	1.72598	0.0388769	CHERP//CPSF1//DDX42//DDX5//DHX38//HABP4//HNRNPA2B1//IWS1//JMJD6//PRMT5//PRPF18//PTBP1//RBMX2//SNRPB//SNRPN//THOC1//WBP4//ZNF638
GO:0006366	transcription_by_RNA_polymerase_II	Biological Process	21	482	463	17492	0.0180799	0.169384	1.7428	1.646	0.0453564	CPSF1//DDX5//FOS//GTF2E2//INTS5//IRF7//IWS1//KLF4//NFRKB//NOTCH1//NRBF2//NRBP1//PHRF1//RXRB//SNRPB//STAT3//TAF4B//TAF5//TCERG1//TP53//TSC22D1
GO:0007169	transmembrane_receptor_protein_tyrosine_kinase_signaling_pathway	Biological Process	22	512	463	17492	0.0181875	0.169788	1.74023	1.62335	0.0475162	AP2M1//ARPC1B//ATP6V0E1//ATP6V1D//ATP6V1E1//CRK//FER//FGF16//HCK//IGF2R//MYO1E//NAMPT//NCF4//PAK1//PIK3CB//PTBP1//PTK2B//RAF1//RASSF2//STAT3//STAT6//TXNIP
GO:0010720	positive_regulation_of_cell_development	Biological Process	23	542	463	17492	0.0182175	0.169788	1.73951	1.6032	0.049676	ARHGEF2//BCL6//CAMK1//CPNE1//CRK//DAG1//FIG4//GDI1//GRN//LLPH//LPAR1//MAP2K1//NEDD9//NOTCH1//PAK1//PLXNB2//PRMT5//PTK2B//RAP1A//RGS2//SEMA4D//SERPINI1//TNFRSF1B
GO:0032481	positive_regulation_of_type_I_interferon_production	Biological Process	6	79	463	17492	0.018239	0.169788	1.739	2.86934	0.012959	CHUK//FLOT1//IFIH1//IRF7//STAT6//TLR4
GO:0010038	response_to_metal_ion	Biological Process	17	366	463	17492	0.0182765	0.169788	1.73811	1.75479	0.0367171	CHUK//CPNE1//CPNE2//CPOX//EIF2S1//FOS//GDI1//HPCA//LGMN//MAPK9//MCOLN1//NPC1//PTK2B//SUMO1//TP53//TXNIP//XRCC4
GO:0048640	negative_regulation_of_developmental_growth	Biological Process	7	102	463	17492	0.0186574	0.172688	1.72915	2.59272	0.0151188	IFRD1//LGMN//MSTN//PAK1//RGS2//SEMA4A//SEMA4D
GO:0034976	response_to_endoplasmic_reticulum_stress	Biological Process	13	255	463	17492	0.0186669	0.172688	1.72893	1.92602	0.0280778	ANKZF1//ATXN3//EEF2//EIF2S1//EXTL2//FLOT1//NRBF2//PDIA6//PPP1R15A//SEC16A//TOR1A//TP53//TRIM25
GO:0071166	ribonucleoprotein_complex_localization	Biological Process	8	126	463	17492	0.0189181	0.174647	1.72312	2.39871	0.0172786	CPSF1//DHX38//GLE1//HNRNPA2B1//NUP210//NUP93//THOC1//UPF2
GO:0010976	positive_regulation_of_neuron_projection_development	Biological Process	14	283	463	17492	0.0189616	0.174683	1.72213	1.86896	0.0302376	CAMK1//FIG4//GDI1//GRN//LLPH//LPAR1//MAP2K1//PAK1//PLXNB2//PTK2B//RAP1A//RGS2//SEMA4D//SERPINI1
GO:0034122	negative_regulation_of_toll-like_receptor_signaling_pathway	Biological Process	4	39	463	17492	0.019187	0.175299	1.71699	3.87484	0.00863931	F2RL1//IRF4//LILRA2//TLR4
GO:0035710	CD4-positive,_alpha-beta_T_cell_activation	Biological Process	4	39	463	17492	0.019187	0.175299	1.71699	3.87484	0.00863931	IRF4//SEMA4A//STAT3//STAT6
GO:0048713	regulation_of_oligodendrocyte_differentiation	Biological Process	4	39	463	17492	0.019187	0.175299	1.71699	3.87484	0.00863931	DAG1//NOTCH1//PRMT5//TNFRSF1B
GO:0051154	negative_regulation_of_striated_muscle_cell_differentiation	Biological Process	4	39	463	17492	0.019187	0.175299	1.71699	3.87484	0.00863931	HDAC3//NOTCH1//PAK1//RGS2
GO:0001773	myeloid_dendritic_cell_activation	Biological Process	3	22	463	17492	0.0195248	0.177287	1.70941	5.15178	0.00647948	DOCK2//IRF4//LTBR
GO:0032928	regulation_of_superoxide_anion_generation	Biological Process	3	22	463	17492	0.0195248	0.177287	1.70941	5.15178	0.00647948	F2RL1//GNAI2//PRKCD
GO:1903205	regulation_of_hydrogen_peroxide-induced_cell_death	Biological Process	3	22	463	17492	0.0195248	0.177287	1.70941	5.15178	0.00647948	PDE8A//PSAP//TP53
GO:0010810	regulation_of_cell-substrate_adhesion	Biological Process	11	203	463	17492	0.019599	0.177301	1.70777	2.04718	0.0237581	ATXN3//BCL6//BST1//CRK//DAG1//GBP1//NEDD9//NID1//NOTCH1//PIK3CB//PTK2B
GO:0045666	positive_regulation_of_neuron_differentiation	Biological Process	17	369	463	17492	0.0196145	0.177301	1.70742	1.74053	0.0367171	ARHGEF2//BCL6//CAMK1//CPNE1//FIG4//GDI1//GRN//LLPH//LPAR1//MAP2K1//PAK1//PLXNB2//PTK2B//RAP1A//RGS2//SEMA4D//SERPINI1
GO:0044089	positive_regulation_of_cellular_component_biogenesis	Biological Process	22	516	463	17492	0.0196768	0.177301	1.70605	1.61076	0.0475162	AIM2//ARPC1B//DAG1//F2RL1//FER//FLOT1//HCK//LCP1//LPAR1//MAPK9//MNS1//MSTN//NLGN3//PAK1//PSMC3//PSMC5//PTK2B//SEMA4A//SEMA4D//SUMO1//TLR4//TP53
GO:0032479	regulation_of_type_I_interferon_production	Biological Process	8	127	463	17492	0.0197409	0.177301	1.70463	2.37982	0.0172786	CHUK//FLOT1//IFIH1//IRF7//STAT6//TLR4//TRIM21//TRIM25
GO:0061077	chaperone-mediated_protein_folding	Biological Process	5	59	463	17492	0.0197452	0.177301	1.70454	3.20167	0.0107991	CD74//DNAJB4//HSPE1//TOR1A//TOR1B
GO:0110053	regulation_of_actin_filament_organization	Biological Process	13	257	463	17492	0.019767	0.177301	1.70406	1.91104	0.0280778	ARPC1B//CORO1A//F2RL1//FER//GBA2//GMFG//HCK//LPAR1//PAK1//PRKCD//PTK2B//RDX//TMSB4Y
GO:0032956	regulation_of_actin_cytoskeleton_organization	Biological Process	16	341	463	17492	0.0198926	0.177631	1.70131	1.77265	0.0345572	ARPC1B//BST1//BST2//CORO1A//CRK//F2RL1//FER//GBA2//GMFG//HCK//LPAR1//PAK1//PRKCD//PTK2B//RDX//TMSB4Y
GO:0051056	regulation_of_small_GTPase_mediated_signal_transduction	Biological Process	16	341	463	17492	0.0198926	0.177631	1.70131	1.77265	0.0345572	ARHGAP15//ARHGAP30//ARHGEF2//BCL6//CRK//F2RL1//FLOT1//GDI1//IQSEC1//LPAR1//MAPKAP1//NOTCH1//RAF1//RASA3//RDX//RGL2
GO:0006355	regulation_of_transcription,_DNA-templated	Biological Process	108	3398	463	17492	0.0199289	0.177631	1.70052	1.20077	0.233261	ADAM8//AIM2//ARHGEF2//ARID4A//BAP1//BAZ1B//BAZ2A//BCL6//BRMS1//CALCOCO1//CAMK1//CARD16//CBX3//CBX4//CD74//CHD4//CHUK//CNBP//CRK//CRTC3//DAP//DDX5//DEDD2//DNAJA3//DNMT1//ELK1//EWSR1//F2RL1//FER//FLOT1//FOS//FOXK1//HCFC1//HCK//HDAC3//HEXB//HIF1AN//HMGN3//HNRNPA2B1//HNRNPAB//IFI27//IL18//IRF4//IRF7//IRF8//JMJD6//KARS//KLF4//MAP2K1//MAPK9//MSTN//NAMPT//NOD1//NOTCH1//OSM//PARP9//PBXIP1//PDE8A//PHF14//…
GO:0051147	regulation_of_muscle_cell_differentiation	Biological Process	9	152	463	17492	0.0199644	0.177631	1.69974	2.23696	0.0194384	CAMK1//CD53//DNMT1//FLOT1//HDAC3//NOTCH1//PAK1//PTBP1//RGS2
GO:2001141	regulation_of_RNA_biosynthetic_process	Biological Process	110	3470	463	17492	0.0201435	0.178865	1.69587	1.19763	0.237581	ADAM8//AIM2//ARHGEF2//ARID4A//BAP1//BAZ1B//BAZ2A//BCL6//BRMS1//CALCOCO1//CAMK1//CARD16//CBX3//CBX4//CD74//CHD4//CHUK//CNBP//CRK//CRTC3//DAP//DDX5//DEDD2//DNAJA3//DNMT1//ELK1//EWSR1//F2RL1//FER//FLOT1//FOS//FOXK1//HCFC1//HCK//HDAC3//HEXB//HIF1AN//HMGN3//HNRNPA2B1//HNRNPAB//IFI27//IL18//IRF4//IRF7//IRF8//JMJD6//KARS//KLF4//MAP2K1//MAPK9//MSTN//NAMPT//NOD1//NOTCH1//OSM//PARP9//PBXIP1//PDE8A//PHF14//…
GO:2000377	regulation_of_reactive_oxygen_species_metabolic_process	Biological Process	10	178	463	17492	0.0203362	0.179943	1.69173	2.12245	0.0215983	BST1//F2RL1//GADD45A//GNAI2//KLF4//PRKCD//PTK2B//STAT3//TLR4//TP53
GO:0038061	NIK|NF-kappaB_signaling	Biological Process	6	81	463	17492	0.0203871	0.179943	1.69065	2.7985	0.012959	CHUK//PPP4C//PSMA3//PSMC3//PSMC5//PSMD13
GO:0048017	inositol_lipid-mediated_signaling	Biological Process	6	81	463	17492	0.0203871	0.179943	1.69065	2.7985	0.012959	KBTBD2//PI4KA//PI4KB//PIK3CB//PIK3CD//PIK3R5
GO:0016569	covalent_chromatin_modification	Biological Process	17	371	463	17492	0.0205474	0.180997	1.68724	1.73115	0.0367171	ARID4A//BAP1//BAZ1B//BAZ2A//BRMS1//HCFC1//HDAC3//IRF4//JMJD6//PKN1//PRKCD//PRMT5//RNF20//SETD1B//TADA2B//TAF5//USP22
GO:0006405	RNA_export_from_nucleus	Biological Process	8	128	463	17492	0.0205889	0.181002	1.68637	2.36123	0.0172786	CPSF1//DHX38//GLE1//HNRNPA2B1//NUP210//NUP93//THOC1//UPF2
GO:0090316	positive_regulation_of_intracellular_protein_transport	Biological Process	9	153	463	17492	0.0207355	0.181319	1.68328	2.22234	0.0194384	BAP1//CAMK1//HDAC3//HPCA//PAK1//PRKCD//SEC16A//TP53//UBR5
GO:1904646	cellular_response_to_amyloid-beta	Biological Process	4	40	463	17492	0.0208857	0.181319	1.68015	3.77797	0.00863931	ATP1A3//LGMN//NAMPT//TLR4
GO:0010467	gene_expression	Biological Process	67	1982	463	17492	0.0210582	0.181319	1.67658	1.27711	0.144708	AFG3L2//BAZ2A//CASP1//CHERP//CIDEB//CORIN//CPSF1//DDX42//DDX5//DEDD2//DHX29//DHX38//ECE1//EEF2//EIF2S1//FOS//GLE1//GSPT1//GTF2E2//HABP4//HNRNPA2B1//INTS5//IRF7//IWS1//JMJD6//KARS//KBTBD2//KLF4//LGMN//MDN1//MRPS23//NFRKB//NOTCH1//NRBF2//NRBP1//NUP210//NUP93//PABPC4//PCSK7//PHRF1//PISD//PRMT5//PRPF18//PTBP1//QARS//RBMX2//RPL36A//RXRB//SEC11B//SMARCB1//SNRPB//SNRPN//STAT3//TAF4B//TAF5//TBL3//TCERG1/…
GO:0007040	lysosome_organization	Biological Process	5	60	463	17492	0.0210871	0.181319	1.67598	3.14831	0.0107991	AKTIP//CORO1A//GRN//HEXB//RAB20
GO:0061515	myeloid_cell_development	Biological Process	5	60	463	17492	0.0210871	0.181319	1.67598	3.14831	0.0107991	ARID4A//BCL6//JMJD6//LRRK1//PABPC4
GO:0000122	negative_regulation_of_transcription_by_RNA_polymerase_II	Biological Process	33	861	463	17492	0.0214366	0.181319	1.66884	1.448	0.0712743	BCL6//BRMS1//CBX4//CNBP//DDX5//DNAJA3//DNMT1//FOXK1//HCFC1//HDAC3//HIF1AN//HNRNPA2B1//IFI27//IRF7//IRF8//KLF4//NOTCH1//PARP9//PHF14//PKIG//POU6F1//SEMA4D//STAT3//STAT6//SUMO1//TCERG1//THAP11//TP53//TXNIP//ZNF140//ZNF263//ZNF366//ZNF608
GO:0032088	negative_regulation_of_NF-kappaB_transcription_factor_activity	Biological Process	6	82	463	17492	0.0215228	0.181319	1.6671	2.76437	0.012959	AIM2//BRMS1//CHUK//DAP//KLF4//TRIM21
GO:0071277	cellular_response_to_calcium_ion	Biological Process	6	82	463	17492	0.0215228	0.181319	1.6671	2.76437	0.012959	CPNE1//CPNE2//FOS//HPCA//LGMN//MCOLN1
GO:0007264	small_GTPase_mediated_signal_transduction	Biological Process	15	316	463	17492	0.0216132	0.181319	1.66528	1.79334	0.0323974	ARHGAP30//BCL6//CHUK//DNAJA3//DNMT1//DOCK2//DOCK9//GDI1//RAB20//RAP1A//RGL2//RIN2//RIT1//RUFY1//TP53
GO:0030097	hemopoiesis	Biological Process	23	552	463	17492	0.0219986	0.181319	1.6576	1.57415	0.049676	ARID4A//BCL6//CD74//DNAJA3//DOCK2//EEF2//F2RL1//GAB3//IRF4//IRF8//JMJD6//KLF4//LRRK1//LTBR//MYO1E//PABPC4//PIK3CD//PRDX3//PTK2B//SEMA4A//STAT3//STAT6//TP53
GO:0048714	positive_regulation_of_oligodendrocyte_differentiation	Biological Process	3	23	463	17492	0.022022	0.181319	1.65714	4.92779	0.00647948	DAG1//PRMT5//TNFRSF1B
GO:0071218	cellular_response_to_misfolded_protein	Biological Process	3	23	463	17492	0.022022	0.181319	1.65714	4.92779	0.00647948	ANKZF1//ATXN3//TOR1A
GO:0030036	actin_cytoskeleton_organization	Biological Process	21	492	463	17492	0.0220966	0.181319	1.65567	1.61255	0.0453564	ARHGEF2//ARPC1B//ATXN3//BCL6//CAP1//CORO1A//DIAPH2//DOCK2//EPB41L2//FER//FLII//FLNB//IQSEC1//LCP1//MAPKAP1//NEDD9//PACSIN2//PAK1//PARVG//PTK2B//TMSB4Y
GO:0001188	RNA_polymerase_I_preinitiation_complex_assembly	Biological Process	2	9	463	17492	0.0222503	0.181319	1.65266	8.39549	0.00431965	BAZ2A//SMARCB1
GO:0002480	antigen_processing_and_presentation_of_exogenous_peptide_antigen_via_MHC_class_I,_TAP-independent	Biological Process	2	9	463	17492	0.0222503	0.181319	1.65266	8.39549	0.00431965	HLA-B//HLA-H
GO:0006768	biotin_metabolic_process	Biological Process	2	9	463	17492	0.0222503	0.181319	1.65266	8.39549	0.00431965	BTD//PCCB
GO:0016139	glycoside_catabolic_process	Biological Process	2	9	463	17492	0.0222503	0.181319	1.65266	8.39549	0.00431965	GBA2//NAGA
GO:0019043	establishment_of_viral_latency	Biological Process	2	9	463	17492	0.0222503	0.181319	1.65266	8.39549	0.00431965	IRF7//XRCC4
GO:0032042	mitochondrial_DNA_metabolic_process	Biological Process	2	9	463	17492	0.0222503	0.181319	1.65266	8.39549	0.00431965	DNA2//TP53
GO:0032602	chemokine_production	Biological Process	2	9	463	17492	0.0222503	0.181319	1.65266	8.39549	0.00431965	F2RL1//IL18
GO:0043380	regulation_of_memory_T_cell_differentiation	Biological Process	2	9	463	17492	0.0222503	0.181319	1.65266	8.39549	0.00431965	BCL6//FGL2
GO:0045063	T-helper_1_cell_differentiation	Biological Process	2	9	463	17492	0.0222503	0.181319	1.65266	8.39549	0.00431965	SEMA4A//STAT6
GO:0045955	negative_regulation_of_calcium_ion-dependent_exocytosis	Biological Process	2	9	463	17492	0.0222503	0.181319	1.65266	8.39549	0.00431965	GNAI2//NOTCH1
GO:0046598	positive_regulation_of_viral_entry_into_host_cell	Biological Process	2	9	463	17492	0.0222503	0.181319	1.65266	8.39549	0.00431965	CD74//TRIM21
GO:0051014	actin_filament_severing	Biological Process	2	9	463	17492	0.0222503	0.181319	1.65266	8.39549	0.00431965	FLII//GMFG
GO:0051126	negative_regulation_of_actin_nucleation	Biological Process	2	9	463	17492	0.0222503	0.181319	1.65266	8.39549	0.00431965	CORO1A//GMFG
GO:0060907	positive_regulation_of_macrophage_cytokine_production	Biological Process	2	9	463	17492	0.0222503	0.181319	1.65266	8.39549	0.00431965	CD74//TLR4
GO:0071225	cellular_response_to_muramyl_dipeptide	Biological Process	2	9	463	17492	0.0222503	0.181319	1.65266	8.39549	0.00431965	ARHGEF2//NOD1
GO:0097084	vascular_smooth_muscle_cell_development	Biological Process	2	9	463	17492	0.0222503	0.181319	1.65266	8.39549	0.00431965	ADM//NOTCH1
GO:0098696	regulation_of_neurotransmitter_receptor_localization_to_postsynaptic_specialization_membrane	Biological Process	2	9	463	17492	0.0222503	0.181319	1.65266	8.39549	0.00431965	DAG1//RAP1A
GO:1905050	positive_regulation_of_metallopeptidase_activity	Biological Process	2	9	463	17492	0.0222503	0.181319	1.65266	8.39549	0.00431965	KARS//STAT3
GO:0034613	cellular_protein_localization	Biological Process	55	1583	463	17492	0.0223269	0.181319	1.65117	1.31262	0.11879	AP2M1//ARHGEF2//ATP6V1D//AXIN2//CD74//CPSF1//CROT//DAG1//DHX38//DNAJA1//DNAJA3//DYNC2LI1//FCN1//FLNB//FLOT1//GBP1//GLE1//GORASP1//HNRNPA2B1//HOMER3//IFT52//MOAP1//NPC1//NUP210//NUP93//PACSIN2//PEX5//PPP1R15A//RAB20//RANGAP1//RAP1A//RDX//RPAIN//RPL36A//RRAGD//SEC16A//SEC23B//SEC24C//SNX27//SRP68//STAT3//STX11//STX3//SUMO1//TBC1D22B//TERF2//THOC1//TMSB4Y//TNPO3//TOR1A//TOR1B//TP53//TXNIP//UPF2//ZDH…
GO:0030098	lymphocyte_differentiation	Biological Process	12	234	463	17492	0.0223397	0.181319	1.65092	1.93742	0.0259179	BCL6//CD74//DNAJA3//DOCK2//IRF4//JMJD6//PIK3CD//PTK2B//SEMA4A//STAT3//STAT6//TP53
GO:0016485	protein_processing	Biological Process	9	155	463	17492	0.0223419	0.181319	1.65088	2.19366	0.0194384	AFG3L2//CASP1//CIDEB//CORIN//ECE1//LGMN//PCSK7//PISD//SEC11B
GO:0002687	positive_regulation_of_leukocyte_migration	Biological Process	8	130	463	17492	0.0223619	0.181319	1.65049	2.3249	0.0172786	ADAM8//CD74//F2RL1//KARS//LGMN//MSTN//PTK2B//TP53
GO:0032269	negative_regulation_of_cellular_protein_metabolic_process	Biological Process	38	1024	463	17492	0.0223888	0.181319	1.64997	1.40198	0.0820734	BST2//CAMK2N2//CARD16//CARD17//CSK//DAG1//DNAJA1//DNMT1//EIF2S1//F2RL1//GADD45A//GBP1//GLMN//GMFG//GNAI2//HDAC3//KLF4//LRRK1//MOV10//PKIG//PKN1//PLAUR//PPP1R15A//PRDX3//PRKCD//QARS//RAF1//RASSF2//RGS2//SEMA4D//SERPINI1//SMARCB1//STAT3//STK38//TLR4//TP53//TRIM21//UBR5
GO:0046631	alpha-beta_T_cell_activation	Biological Process	5	61	463	17492	0.0224872	0.181319	1.64806	3.0967	0.0107991	DOCK2//IRF4//SEMA4A//STAT3//STAT6
GO:1904950	negative_regulation_of_establishment_of_protein_localization	Biological Process	10	181	463	17492	0.0225364	0.181319	1.64712	2.08728	0.0215983	CARD16//CARD17//CSK//DNAJA1//F2RL1//GBP1//GDI1//LILRA5//PKIG//RANGAP1
GO:0030890	positive_regulation_of_B_cell_proliferation	Biological Process	4	41	463	17492	0.0226738	0.181319	1.64448	3.68582	0.00863931	BCL6//BST1//CD74//TLR4
GO:1901985	positive_regulation_of_protein_acetylation	Biological Process	4	41	463	17492	0.0226738	0.181319	1.64448	3.68582	0.00863931	CAMK1//SMARCB1//TADA2B//WBP2
GO:1902893	regulation_of_pri-miRNA_transcription_by_RNA_polymerase_II	Biological Process	4	41	463	17492	0.0226738	0.181319	1.64448	3.68582	0.00863931	DDX5//FOS//STAT3//TP53
GO:2000772	regulation_of_cellular_senescence	Biological Process	4	41	463	17492	0.0226738	0.181319	1.64448	3.68582	0.00863931	BCL6//NAMPT//TERF2//TP53
GO:0010507	negative_regulation_of_autophagy	Biological Process	6	83	463	17492	0.0227006	0.181319	1.64396	2.73106	0.012959	DAP//FOXK1//NAMPT//NPC1//STAT3//TP53
GO:0070374	positive_regulation_of_ERK1_and_ERK2_cascade	Biological Process	11	208	463	17492	0.0229755	0.181319	1.63874	1.99796	0.0237581	CD74//F2RL1//GNAI2//KARS//MAP2K1//NOD1//NOTCH1//PDE8A//PTK2B//RAP1A//TLR4
GO:0006664	glycolipid_metabolic_process	Biological Process	7	107	463	17492	0.0235815	0.181319	1.62743	2.47157	0.0151188	ASAH1//GBA2//HEXB//NAGA//PIGN//PIGS//PSAP
GO:2000116	regulation_of_cysteine-type_endopeptidase_activity	Biological Process	12	236	463	17492	0.0236776	0.181319	1.62566	1.921	0.0259179	AIM2//CARD16//CASP1//CIDEB//DAP//HSPE1//KLF4//LGMN//NOD1//PLAUR//PRDX3//RAF1
GO:0010975	regulation_of_neuron_projection_development	Biological Process	21	496	463	17492	0.0238838	0.181319	1.6219	1.59954	0.0453564	CAMK1//CRK//FIG4//GDI1//GORASP1//GRN//IFRD1//KLF4//LLPH//LPAR1//MAP2K1//MOV10//NLGN3//PAK1//PLXNB2//PTK2B//RAP1A//RGS2//SEMA4A//SEMA4D//SERPINI1
GO:0045071	negative_regulation_of_viral_genome_replication	Biological Process	5	62	463	17492	0.0239461	0.181319	1.62076	3.04675	0.0107991	APOBEC3B//BST2//OAS1//OAS2//OAS3
GO:0046626	regulation_of_insulin_receptor_signaling_pathway	Biological Process	5	62	463	17492	0.0239461	0.181319	1.62076	3.04675	0.0107991	GNAI2//MSTN//PAK1//PRKCD//SESN3
GO:0016070	RNA_metabolic_process	Biological Process	57	1657	463	17492	0.0240351	0.181319	1.61915	1.2996	0.12311	APOBEC3B//BAZ2A//CHERP//CPSF1//DDX42//DDX5//DEDD2//DHX38//DNA2//EDC4//FOS//GSPT1//GTF2E2//HABP4//HNRNPA2B1//INTS5//IRF7//IWS1//JMJD6//KARS//KLF4//MDN1//MOV10//NFRKB//NOTCH1//NRBF2//NRBP1//OAS2//PABPC4//PHRF1//PRMT5//PRPF18//PTBP1//QARS//RBMX2//RNASEH1//RNH1//RPL36A//RXRB//SMARCB1//SNRPB//SNRPN//STAT3//TAF4B//TAF5//TBL3//TCERG1//THOC1//TP53//TRMT61B//TSC22D1//TSR2//UPF2//WBP4//XRN2//YARS//ZNF638
GO:0045687	positive_regulation_of_glial_cell_differentiation	Biological Process	4	42	463	17492	0.0245524	0.181319	1.60991	3.59807	0.00863931	DAG1//NOTCH1//PRMT5//TNFRSF1B
GO:0043032	positive_regulation_of_macrophage_activation	Biological Process	3	24	463	17492	0.0246849	0.181319	1.60757	4.72246	0.00647948	KARS//TLR4//TNIP2
GO:0090344	negative_regulation_of_cell_aging	Biological Process	3	24	463	17492	0.0246849	0.181319	1.60757	4.72246	0.00647948	BCL6//NAMPT//TERF2
GO:2000209	regulation_of_anoikis	Biological Process	3	24	463	17492	0.0246849	0.181319	1.60757	4.72246	0.00647948	BRMS1//NOTCH1//PTRH2
GO:0032760	positive_regulation_of_tumor_necrosis_factor_production	Biological Process	6	85	463	17492	0.0251846	0.181319	1.59887	2.6668	0.012959	ARHGEF2//IFIH1//LILRA2//LILRA5//NOD1//TLR4
GO:0046427	positive_regulation_of_receptor_signaling_pathway_via_JAK-STAT	Biological Process	6	85	463	17492	0.0251846	0.181319	1.59887	2.6668	0.012959	IL18//NOTCH1//OSM//PARP9//PTK2B//STAT3
GO:1901532	regulation_of_hematopoietic_progenitor_cell_differentiation	Biological Process	6	85	463	17492	0.0251846	0.181319	1.59887	2.6668	0.012959	NOTCH1//OSM//PSMA3//PSMC3//PSMC5//PSMD13
GO:1902882	regulation_of_response_to_oxidative_stress	Biological Process	6	85	463	17492	0.0251846	0.181319	1.59887	2.6668	0.012959	MAPKAP1//PDE8A//PSAP//SESN3//TLR4//TP53
GO:1903506	regulation_of_nucleic_acid-templated_transcription	Biological Process	109	3465	463	17492	0.0253826	0.181319	1.59546	1.18845	0.235421	ADAM8//AIM2//ARHGEF2//ARID4A//BAP1//BAZ1B//BAZ2A//BCL6//BRMS1//CALCOCO1//CAMK1//CARD16//CBX3//CBX4//CD74//CHD4//CHUK//CNBP//CRK//CRTC3//DAP//DDX5//DEDD2//DNAJA3//DNMT1//ELK1//EWSR1//F2RL1//FER//FLOT1//FOS//FOXK1//HCFC1//HCK//HDAC3//HEXB//HIF1AN//HMGN3//HNRNPA2B1//HNRNPAB//IFI27//IL18//IRF4//IRF7//IRF8//JMJD6//KARS//KLF4//MAP2K1//MAPK9//MSTN//NAMPT//NOD1//NOTCH1//OSM//PARP9//PBXIP1//PDE8A//PHF14//…
GO:0046686	response_to_cadmium_ion	Biological Process	5	63	463	17492	0.0254647	0.181319	1.59406	2.99839	0.0107991	CHUK//FOS//MAPK9//NPC1//SUMO1
GO:0045926	negative_regulation_of_growth	Biological Process	12	239	463	17492	0.0257937	0.181319	1.58849	1.89689	0.0259179	BCL6//BST2//IFRD1//LGMN//MSTN//NDRG3//NOTCH1//PAK1//RGS2//SEMA4A//SEMA4D//TP53
GO:0006338	chromatin_remodeling	Biological Process	9	159	463	17492	0.0258187	0.181319	1.58807	2.13847	0.0194384	BAZ1B//BAZ2A//CBX3//CHD4//NASP//PAK1//SMARCB1//SMARCD2//TADA2B
GO:0033043	regulation_of_organelle_organization	Biological Process	46	1297	463	17492	0.0258971	0.181319	1.58675	1.33991	0.0993521	ARHGEF2//ARPC1B//AXIN2//BAP1//BCL6//BST1//BST2//CAMK1//CIDEB//CORO1A//CRK//DNMT1//DYNC2LI1//F2RL1//FER//GBA2//GMFG//GRN//HCK//HNRNPA2B1//HORMAD1//IWS1//LCP1//LPAR1//MAP2K1//MAP4//MAPK9//MID1IP1//MNS1//MOAP1//PAK1//PLAUR//PRKCD//PRMT5//PTK2B//RDX//RNF20//SMARCB1//TADA2B//TBC1D22B//TERF2//TMSB4Y//TP53//UBR5//UVRAG//WBP2
GO:0048545	response_to_steroid_hormone	Biological Process	15	324	463	17492	0.02627	0.181319	1.58054	1.74906	0.0323974	ADM//ATP1A1//ATP1A3//CALCOCO1//CBX3//DDX5//DNAJA1//FOS//MSTN//NOTCH1//NPC1//RXRB//TXNIP//UBR5//WBP2
GO:0060964	regulation_of_gene_silencing_by_miRNA	Biological Process	6	86	463	17492	0.0264919	0.181319	1.57689	2.63579	0.012959	DDX5//MAP2K1//NUP210//NUP93//STAT3//TP53
GO:0071622	regulation_of_granulocyte_chemotaxis	Biological Process	4	43	463	17492	0.0265222	0.181319	1.57639	3.51439	0.00863931	BST1//CD74//KARS//MSTN
GO:0140115	export_across_plasma_membrane	Biological Process	4	43	463	17492	0.0265222	0.181319	1.57639	3.51439	0.00863931	ABCB1//ATP1A1//ATP1A3//SLC15A2
GO:0050867	positive_regulation_of_cell_activation	Biological Process	18	412	463	17492	0.0266285	0.181319	1.57465	1.65057	0.0388769	ADAM8//BCL6//BST1//CD74//CORO1A//CSK//DNAJA3//F2RL1//IL18//KARS//LILRA2//LILRA5//MAP3K8//PAK1//STAT6//TLR4//TNFSF13//TNIP2
GO:0071453	cellular_response_to_oxygen_levels	Biological Process	11	213	463	17492	0.026759	0.181319	1.57253	1.95106	0.0237581	ADAM8//CARD16//HIF1AN//LPAR1//NAMPT//NOTCH1//PSMA3//PSMC3//PSMC5//PSMD13//TP53
GO:0002429	immune_response-activating_cell_surface_receptor_signaling_pathway	Biological Process	19	442	463	17492	0.0268013	0.181319	1.57184	1.62401	0.0410367	ARPC1B//CHUK//CRK//CSK//FCGR3A//FCN1//HCK//LILRA2//MNDA//PAK1//PIK3CB//PIK3CD//PRKCD//PSMA3//PSMC3//PSMC5//PSMD13//RAF1//TEC
GO:0006909	phagocytosis	Biological Process	15	325	463	17492	0.0269008	0.181319	1.57023	1.74368	0.0323974	ARPC1B//BIN2//CORO1A//CRK//FCGR3A//FCN1//HCK//IRF8//JMJD6//NCF4//PAK1//PIK3CB//PRKCD//RAB20//TLR4
GO:0006687	glycosphingolipid_metabolic_process	Biological Process	5	64	463	17492	0.0270436	0.181319	1.56794	2.95154	0.0107991	ASAH1//GBA2//HEXB//NAGA//PSAP
GO:0042246	tissue_regeneration	Biological Process	5	64	463	17492	0.0270436	0.181319	1.56794	2.95154	0.0107991	DAG1//IFRD1//MSTN//NOTCH1//TEC
GO:0046824	positive_regulation_of_nucleocytoplasmic_transport	Biological Process	5	64	463	17492	0.0270436	0.181319	1.56794	2.95154	0.0107991	CAMK1//HDAC3//PRKCD//TP53//UBR5
GO:0019438	aromatic_compound_biosynthetic_process	Biological Process	42	1169	463	17492	0.0270591	0.181319	1.56769	1.35735	0.0907127	BAZ2A//CNP//CPOX//CPSF1//DDX5//FOS//GFPT2//GNPDA1//GTF2E2//GUCY1B2//INTS5//IRF7//IWS1//KARS//KLF4//NADK//NAMPT//NFRKB//NOTCH1//NRBF2//NRBP1//PANK4//PARP9//PDE8A//PHRF1//PRMT5//RXRB//SLC35B3//SMARCB1//SNRPB//STAT3//TAF4B//TAF5//TCERG1//TERF2//TP53//TRIM25//TSC22D1//UAP1//UNG//WRNIP1//XRN2
GO:0000338	protein_deneddylation	Biological Process	2	10	463	17492	0.0273318	0.181319	1.56333	7.55594	0.00431965	COPS7B//TOR1A
GO:0006264	mitochondrial_DNA_replication	Biological Process	2	10	463	17492	0.0273318	0.181319	1.56333	7.55594	0.00431965	DNA2//DNAJA3
GO:0007016	cytoskeletal_anchoring_at_plasma_membrane	Biological Process	2	10	463	17492	0.0273318	0.181319	1.56333	7.55594	0.00431965	DAG1//FLNB
GO:0032836	glomerular_basement_membrane_development	Biological Process	2	10	463	17492	0.0273318	0.181319	1.56333	7.55594	0.00431965	MYO1E//NID1
GO:0033182	regulation_of_histone_ubiquitination	Biological Process	2	10	463	17492	0.0273318	0.181319	1.56333	7.55594	0.00431965	RNF20//UBR5
GO:0034139	regulation_of_toll-like_receptor_3_signaling_pathway	Biological Process	2	10	463	17492	0.0273318	0.181319	1.56333	7.55594	0.00431965	F2RL1//FLOT1
GO:0035520	monoubiquitinated_protein_deubiquitination	Biological Process	2	10	463	17492	0.0273318	0.181319	1.56333	7.55594	0.00431965	ATXN3//BAP1
GO:0042092	type_2_immune_response	Biological Process	2	10	463	17492	0.0273318	0.181319	1.56333	7.55594	0.00431965	BCL6//IL18
GO:0061052	negative_regulation_of_cell_growth_involved_in_cardiac_muscle_cell_development	Biological Process	2	10	463	17492	0.0273318	0.181319	1.56333	7.55594	0.00431965	PAK1//RGS2
GO:0070673	response_to_interleukin-18	Biological Process	2	10	463	17492	0.0273318	0.181319	1.56333	7.55594	0.00431965	ALOX5//IL18
GO:0071233	cellular_response_to_leucine	Biological Process	2	10	463	17492	0.0273318	0.181319	1.56333	7.55594	0.00431965	RRAGD//SESN3
GO:0097105	presynaptic_membrane_assembly	Biological Process	2	10	463	17492	0.0273318	0.181319	1.56333	7.55594	0.00431965	NLGN3//NLGN4Y
GO:1900426	positive_regulation_of_defense_response_to_bacterium	Biological Process	2	10	463	17492	0.0273318	0.181319	1.56333	7.55594	0.00431965	F2RL1//GRN
GO:1902741	positive_regulation_of_interferon-alpha_secretion	Biological Process	2	10	463	17492	0.0273318	0.181319	1.56333	7.55594	0.00431965	CHUK//IFIH1
GO:1903265	positive_regulation_of_tumor_necrosis_factor-mediated_signaling_pathway	Biological Process	2	10	463	17492	0.0273318	0.181319	1.56333	7.55594	0.00431965	CASP1//CPNE1
GO:1990253	cellular_response_to_leucine_starvation	Biological Process	2	10	463	17492	0.0273318	0.181319	1.56333	7.55594	0.00431965	RRAGD//SESN3
GO:2000343	positive_regulation_of_chemokine_(C-X-C_motif)_ligand_2_production	Biological Process	2	10	463	17492	0.0273318	0.181319	1.56333	7.55594	0.00431965	CD74//TLR4
GO:0009299	mRNA_transcription	Biological Process	3	25	463	17492	0.0275135	0.181319	1.56045	4.53356	0.00647948	DDX5//STAT3//TP53
GO:0045662	negative_regulation_of_myoblast_differentiation	Biological Process	3	25	463	17492	0.0275135	0.181319	1.56045	4.53356	0.00647948	IL18//MSTN//NOTCH1
GO:0060330	regulation_of_response_to_interferon-gamma	Biological Process	3	25	463	17492	0.0275135	0.181319	1.56045	4.53356	0.00647948	IFNGR2//PARP9//SUMO1
GO:0060334	regulation_of_interferon-gamma-mediated_signaling_pathway	Biological Process	3	25	463	17492	0.0275135	0.181319	1.56045	4.53356	0.00647948	IFNGR2//PARP9//SUMO1
GO:2000482	regulation_of_interleukin-8_secretion	Biological Process	3	25	463	17492	0.0275135	0.181319	1.56045	4.53356	0.00647948	F2RL1//FCN1//TLR4
GO:0071407	cellular_response_to_organic_cyclic_compound	Biological Process	22	534	463	17492	0.0275886	0.181543	1.55927	1.55647	0.0475162	ATP1A1//ATP1A3//CALCOCO1//CBX3//DAG1//DDX5//DNAJA1//ELK1//FLOT1//GRAMD1A//HCFC1//IFIH1//IL18//ITPR2//KLF4//MSTN//NPC1//RAP1A//RXRB//STAT3//UBR5//WBP2
GO:0002690	positive_regulation_of_leukocyte_chemotaxis	Biological Process	6	87	463	17492	0.0278434	0.182947	1.55528	2.6055	0.012959	CD74//F2RL1//KARS//LGMN//MSTN//PTK2B
GO:0071417	cellular_response_to_organonitrogen_compound	Biological Process	24	596	463	17492	0.0279056	0.183084	1.55431	1.52133	0.0518359	ARHGEF2//ATP1A3//ATP6V0E1//ATP6V1D//ATP6V1E1//CRK//CSK//DNMT1//FER//ITPR2//KLF4//LGMN//NAMPT//NOD1//PAK1//PRKCD//RANGAP1//RAP1A//RRAGD//SESN3//STAT3//STAT6//TLR4//TP53
GO:0050729	positive_regulation_of_inflammatory_response	Biological Process	8	136	463	17492	0.0283224	0.185543	1.54787	2.22234	0.0172786	ADAM8//GRN//IL18//KARS//LILRA5//OSM//TLR10//TLR4
GO:0034198	cellular_response_to_amino_acid_starvation	Biological Process	4	44	463	17492	0.028584	0.18698	1.54388	3.43452	0.00863931	DAP//EIF2S1//RRAGD//SESN3
GO:0002637	regulation_of_immunoglobulin_production	Biological Process	5	65	463	17492	0.0286835	0.187078	1.54237	2.90613	0.0107991	BCL6//PKN1//STAT6//THOC1//TNFSF13
GO:0007569	cell_aging	Biological Process	5	65	463	17492	0.0286835	0.187078	1.54237	2.90613	0.0107991	DNAJA3//MAP2K1//PRKCD//TERF2//TP53
GO:0001818	negative_regulation_of_cytokine_production	Biological Process	13	271	463	17492	0.0288776	0.188066	1.53944	1.81231	0.0280778	BCL6//BST2//CARD16//CARD17//CSK//F2RL1//GBP1//HOMER3//IFIH1//KLF4//LILRA5//TLR4//TRIM25
GO:1903706	regulation_of_hemopoiesis	Biological Process	19	446	463	17492	0.0290189	0.188708	1.53732	1.60945	0.0410367	ADAM8//BCL6//CD74//FGL2//FOS//IL18//IRF4//IRF7//MOV10//NOTCH1//OSM//PSMA3//PSMC3//PSMC5//PSMD13//PTK2B//RASSF2//STAT3//TLR4
GO:1904894	positive_regulation_of_receptor_signaling_pathway_via_STAT	Biological Process	6	88	463	17492	0.0292397	0.189865	1.53403	2.57589	0.012959	IL18//NOTCH1//OSM//PARP9//PTK2B//STAT3
GO:0070665	positive_regulation_of_leukocyte_proliferation	Biological Process	8	137	463	17492	0.029413	0.19071	1.53146	2.20611	0.0172786	BCL6//BST1//BST2//CD74//CORO1A//DNAJA3//IL18//TLR4
GO:0052547	regulation_of_peptidase_activity	Biological Process	19	447	463	17492	0.0295942	0.191604	1.52879	1.60585	0.0410367	AIM2//BST2//CARD16//CARD17//CASP1//CIDEB//DAP//GRN//HSPE1//KARS//KLF4//LGMN//NOD1//PLAUR//PRDX3//PSMA3//RAF1//SERPINI1//STAT3
GO:0043434	response_to_peptide_hormone	Biological Process	17	388	463	17492	0.0299055	0.193337	1.52425	1.6553	0.0367171	ADM//ATP6V0E1//ATP6V1D//ATP6V1E1//CHUK//CRK//CSK//DAG1//FER//KBTBD2//NAMPT//PAK1//PRKCD//RANGAP1//SESN3//STAT3//STAT6
GO:0030518	intracellular_steroid_hormone_receptor_signaling_pathway	Biological Process	5	66	463	17492	0.0303851	0.195228	1.51734	2.8621	0.0107991	CALCOCO1//DDX5//DNAJA1//UBR5//WBP2
GO:0010758	regulation_of_macrophage_chemotaxis	Biological Process	3	26	463	17492	0.0305071	0.195228	1.5156	4.3592	0.00647948	KARS//MSTN//PTK2B
GO:0019883	antigen_processing_and_presentation_of_endogenous_antigen	Biological Process	3	26	463	17492	0.0305071	0.195228	1.5156	4.3592	0.00647948	CD74//HLA-B//HLA-H
GO:0035459	vesicle_cargo_loading	Biological Process	3	26	463	17492	0.0305071	0.195228	1.5156	4.3592	0.00647948	CTAGE1//SEC23B//SEC24C
GO:0048679	regulation_of_axon_regeneration	Biological Process	3	26	463	17492	0.0305071	0.195228	1.5156	4.3592	0.00647948	GRN//KLF4//MAP2K1
GO:0051788	response_to_misfolded_protein	Biological Process	3	26	463	17492	0.0305071	0.195228	1.5156	4.3592	0.00647948	ANKZF1//ATXN3//TOR1A
GO:2000144	positive_regulation_of_DNA-templated_transcription,_initiation	Biological Process	3	26	463	17492	0.0305071	0.195228	1.5156	4.3592	0.00647948	PSMC3//PSMC5//TP53
GO:0019674	NAD_metabolic_process	Biological Process	4	45	463	17492	0.0307386	0.196141	1.51232	3.3582	0.00863931	ADPGK//BST1//FOXK1//NADK
GO:0043949	regulation_of_cAMP-mediated_signaling	Biological Process	4	45	463	17492	0.0307386	0.196141	1.51232	3.3582	0.00863931	CRTC3//GNAI2//LPAR1//RGS2
GO:0016050	vesicle_organization	Biological Process	14	303	463	17492	0.0315481	0.201017	1.50103	1.7456	0.0302376	AKTIP//AP2M1//ARFGAP2//CORO1A//GORASP1//RAB20//SEC16A//SEC23B//SEC24C//SNAP23//SNAP29//STX11//STX3//UVRAG
GO:0006351	transcription,_DNA-templated	Biological Process	25	635	463	17492	0.0318296	0.202519	1.49717	1.48739	0.0539957	BAZ2A//CPSF1//DDX5//FOS//GTF2E2//INTS5//IRF7//IWS1//KLF4//NFRKB//NOTCH1//NRBF2//NRBP1//PHRF1//PRMT5//RXRB//SMARCB1//SNRPB//STAT3//TAF4B//TAF5//TCERG1//TP53//TSC22D1//XRN2
GO:0045596	negative_regulation_of_cell_differentiation	Biological Process	27	698	463	17492	0.0319584	0.203046	1.49542	1.46139	0.0583153	ABCG1//ARHGEF2//AXIN2//BCL6//CD74//DNMT1//FGL2//GBP1//GDI1//GORASP1//HDAC3//IFRD1//IL18//LPAR1//MSTN//NLGN3//NOTCH1//PAK1//PRMT5//PTBP1//PTK2B//RGS2//SEMA4A//SEMA4D//STAT3//TLR4//TP53
GO:0050710	negative_regulation_of_cytokine_secretion	Biological Process	5	67	463	17492	0.0321487	0.203753	1.49284	2.81938	0.0107991	CARD16//CARD17//F2RL1//GBP1//LILRA5
GO:0051249	regulation_of_lymphocyte_activation	Biological Process	21	512	463	17492	0.0321619	0.203753	1.49266	1.54956	0.0453564	ADAM8//BCL6//BST1//CD74//CORO1A//CSK//DNAJA3//FGL2//GLMN//IL18//IRF4//MAP3K8//MNDA//PAK1//PKN1//STAT6//THOC1//TLR4//TNFRSF1B//TNFSF13//TNIP2
GO:0006054	N-acetylneuraminate_metabolic_process	Biological Process	2	11	463	17492	0.0328289	0.204177	1.48374	6.86904	0.00431965	CMAS//GNPDA1
GO:0006449	regulation_of_translational_termination	Biological Process	2	11	463	17492	0.0328289	0.204177	1.48374	6.86904	0.00431965	GLE1//GSPT1
GO:0009629	response_to_gravity	Biological Process	2	11	463	17492	0.0328289	0.204177	1.48374	6.86904	0.00431965	FOS//MSTN
GO:0032635	interleukin-6_production	Biological Process	2	11	463	17492	0.0328289	0.204177	1.48374	6.86904	0.00431965	IL18//LILRA2
GO:0038110	interleukin-2-mediated_signaling_pathway	Biological Process	2	11	463	17492	0.0328289	0.204177	1.48374	6.86904	0.00431965	IL2RB//PTK2B
GO:0045059	positive_thymic_T_cell_selection	Biological Process	2	11	463	17492	0.0328289	0.204177	1.48374	6.86904	0.00431965	CD74//DOCK2
GO:0045060	negative_thymic_T_cell_selection	Biological Process	2	11	463	17492	0.0328289	0.204177	1.48374	6.86904	0.00431965	CD74//DOCK2
GO:0051573	negative_regulation_of_histone_H3-K9_methylation	Biological Process	2	11	463	17492	0.0328289	0.204177	1.48374	6.86904	0.00431965	DNMT1//SMARCB1
GO:0060368	regulation_of_Fc_receptor_mediated_stimulatory_signaling_pathway	Biological Process	2	11	463	17492	0.0328289	0.204177	1.48374	6.86904	0.00431965	CSK//RAP1A
GO:0090481	pyrimidine_nucleotide-sugar_transmembrane_transport	Biological Process	2	11	463	17492	0.0328289	0.204177	1.48374	6.86904	0.00431965	SLC35A5//SLC35D2
GO:0097090	presynaptic_membrane_organization	Biological Process	2	11	463	17492	0.0328289	0.204177	1.48374	6.86904	0.00431965	NLGN3//NLGN4Y
GO:1903054	negative_regulation_of_extracellular_matrix_organization	Biological Process	2	11	463	17492	0.0328289	0.204177	1.48374	6.86904	0.00431965	NOTCH1//TNFRSF1B
GO:2000767	positive_regulation_of_cytoplasmic_translation	Biological Process	2	11	463	17492	0.0328289	0.204177	1.48374	6.86904	0.00431965	CNBP//EEF2
GO:0007215	glutamate_receptor_signaling_pathway	Biological Process	4	46	463	17492	0.0329863	0.20458	1.48167	3.28519	0.00863931	GRIN3A//GRM8//HOMER3//PTK2B
GO:0032873	negative_regulation_of_stress-activated_MAPK_cascade	Biological Process	4	46	463	17492	0.0329863	0.20458	1.48167	3.28519	0.00863931	DNAJA1//F2RL1//HDAC3//QARS
GO:1902275	regulation_of_chromatin_organization	Biological Process	10	193	463	17492	0.0330752	0.204844	1.4805	1.9575	0.0215983	BCL6//CAMK1//DNMT1//IWS1//RNF20//SMARCB1//TADA2B//TP53//UBR5//WBP2
GO:0032770	positive_regulation_of_monooxygenase_activity	Biological Process	3	27	463	17492	0.0336647	0.207562	1.47283	4.19774	0.00647948	NOD1//PTK2B//TERF2
GO:0032801	receptor_catabolic_process	Biological Process	3	27	463	17492	0.0336647	0.207562	1.47283	4.19774	0.00647948	AP2M1//LGMN//UVRAG
GO:0060260	regulation_of_transcription_initiation_from_RNA_polymerase_II_promoter	Biological Process	3	27	463	17492	0.0336647	0.207562	1.47283	4.19774	0.00647948	PSMC3//PSMC5//TP53
GO:0006903	vesicle_targeting	Biological Process	6	91	463	17492	0.0337019	0.207562	1.47235	2.49097	0.012959	ARFGAP2//GORASP1//SEC16A//SEC24C//SNAP23//SNAP29
GO:0042108	positive_regulation_of_cytokine_biosynthetic_process	Biological Process	5	68	463	17492	0.0339751	0.208664	1.46884	2.77792	0.0107991	CD74//GLMN//IRF4//STAT3//TLR4
GO:0048709	oligodendrocyte_differentiation	Biological Process	5	68	463	17492	0.0339751	0.208664	1.46884	2.77792	0.0107991	CNP//CSK//LPAR1//NLGN3//NOTCH1
GO:0002685	regulation_of_leukocyte_migration	Biological Process	10	194	463	17492	0.0340865	0.209058	1.46742	1.94741	0.0215983	ADAM8//BST1//CD74//CRK//F2RL1//KARS//LGMN//MSTN//PTK2B//TP53
GO:0045892	negative_regulation_of_transcription,_DNA-templated	Biological Process	42	1189	463	17492	0.0342814	0.209962	1.46494	1.33452	0.0907127	ARID4A//BAP1//BAZ2A//BCL6//BRMS1//CBX3//CBX4//CNBP//DAP//DDX5//DEDD2//DNAJA3//DNMT1//FOXK1//HCFC1//HDAC3//HIF1AN//HNRNPA2B1//IFI27//IRF7//IRF8//KLF4//NOTCH1//PARP9//PBXIP1//PHF14//PKIG//POU6F1//PSMC5//QARS//SEMA4D//STAT3//STAT6//SUMO1//TCERG1//THAP11//TP53//TXNIP//ZNF140//ZNF263//ZNF366//ZNF608
GO:0043244	regulation_of_protein_complex_disassembly	Biological Process	7	116	463	17492	0.0345681	0.211425	1.46132	2.27981	0.0151188	ARHGEF2//F2RL1//GLE1//GSPT1//MID1IP1//RDX//UVRAG
GO:0006629	lipid_metabolic_process	Biological Process	42	1191	463	17492	0.0350787	0.214203	1.45496	1.33228	0.0907127	ABCG1//ACSM3//ADM//ALDH1A3//ALOX5//ASAH1//CD74//CDIPT//CNBP//CPNE1//CRK//CROT//CYP27A1//CYP4F12//ENPP2//FIG4//GBA2//HEXB//LACTB//LGMN//LPCAT1//LPCAT3//MID1IP1//MTMR12//NAGA//NPC1//PCCB//PGS1//PI4KA//PI4KB//PIGN//PIGS//PIK3CB//PIK3CD//PIK3R5//PISD//PLD3//PRKAB1//PRKAG1//PSAP//RUFY1//SACM1L
GO:0010952	positive_regulation_of_peptidase_activity	Biological Process	10	195	463	17492	0.0351193	0.214203	1.45445	1.93742	0.0215983	AIM2//CASP1//CIDEB//DAP//GRN//HSPE1//KARS//LGMN//NOD1//STAT3
GO:0050764	regulation_of_phagocytosis	Biological Process	6	92	463	17492	0.0352818	0.214881	1.45245	2.46389	0.012959	CSK//DOCK2//F2RL1//HCK//IL2RB//RAP1A
GO:1990928	response_to_amino_acid_starvation	Biological Process	4	47	463	17492	0.0353275	0.214881	1.45189	3.21529	0.00863931	DAP//EIF2S1//RRAGD//SESN3
GO:0018205	peptidyl-lysine_modification	Biological Process	14	308	463	17492	0.0354742	0.215477	1.45009	1.71726	0.0302376	ARID4A//CBX4//HCFC1//IFIH1//IRF4//JMJD6//NUP210//NUP93//RANGAP1//SETD1B//SUMO1//TADA2B//TAF5//USP22
GO:0051048	negative_regulation_of_secretion	Biological Process	11	223	463	17492	0.0356414	0.216195	1.44805	1.86357	0.0237581	CARD16//CARD17//CD74//F2RL1//GBP1//GNAI2//LILRA5//NOTCH1//OSM//RAP1A//TNFRSF1B
GO:0043618	regulation_of_transcription_from_RNA_polymerase_II_promoter_in_response_to_stress	Biological Process	7	117	463	17492	0.0359672	0.217574	1.44409	2.26032	0.0151188	HIF1AN//NOTCH1//PSMA3//PSMC3//PSMC5//PSMD13//TP53
GO:2000736	regulation_of_stem_cell_differentiation	Biological Process	7	117	463	17492	0.0359672	0.217574	1.44409	2.26032	0.0151188	NOTCH1//OSM//PSMA3//PSMC3//PSMC5//PSMD13//STAT3
GO:0097190	apoptotic_signaling_pathway	Biological Process	13	280	463	17492	0.0361585	0.218226	1.44179	1.75406	0.0280778	CASP1//CIDEB//DAP//DDX5//DEDD2//IFI27//MOAP1//PPP1R15A//PRKCD//RAF1//TLR4//TNFRSF1B//TP53
GO:0036294	cellular_response_to_decreased_oxygen_levels	Biological Process	10	196	463	17492	0.0361736	0.218226	1.44161	1.92754	0.0215983	ADAM8//CARD16//HIF1AN//NAMPT//NOTCH1//PSMA3//PSMC3//PSMC5//PSMD13//TP53
GO:1901216	positive_regulation_of_neuron_death	Biological Process	6	93	463	17492	0.0369086	0.22191	1.43287	2.4374	0.012959	EIF2S1//ELK1//FOS//GRN//TLR4//TP53
GO:0010939	regulation_of_necrotic_cell_death	Biological Process	3	28	463	17492	0.0369851	0.22191	1.43197	4.04782	0.00647948	ARHGEF2//ASAH1//TP53
GO:0032459	regulation_of_protein_oligomerization	Biological Process	3	28	463	17492	0.0369851	0.22191	1.43197	4.04782	0.00647948	AIM2//PEX5//TP53
GO:0060143	positive_regulation_of_syncytium_formation_by_plasma_membrane_fusion	Biological Process	3	28	463	17492	0.0369851	0.22191	1.43197	4.04782	0.00647948	CAMK1//CD53//FLOT1
GO:0051046	regulation_of_secretion	Biological Process	30	804	463	17492	0.0372379	0.223125	1.42901	1.40969	0.0647948	ABCG1//ADAM8//AIM2//CARD16//CARD17//CASP1//CD74//CHUK//CORIN//F2RL1//FCN1//FER//GBP1//GLMN//GNAI2//GRIN3A//HMGN3//IFIH1//ITPR2//KARS//LILRA2//LILRA5//NADK//NOTCH1//OAS2//OSM//RAP1A//TLR10//TLR4//TNFRSF1B
GO:1903034	regulation_of_response_to_wounding	Biological Process	9	170	463	17492	0.0373207	0.223318	1.42805	2.0001	0.0194384	CRK//F2RL1//GRN//KLF4//MAP2K1//PLAUR//PRKCD//TEC//TLR4
GO:2000107	negative_regulation_of_leukocyte_apoptotic_process	Biological Process	4	48	463	17492	0.0377626	0.225268	1.42294	3.14831	0.00863931	BCL6//CD74//IRF7//TSC22D3
GO:0032677	regulation_of_interleukin-8_production	Biological Process	5	70	463	17492	0.0378177	0.225268	1.4223	2.69855	0.0107991	CD74//F2RL1//FCN1//KLF4//TLR4
GO:1900076	regulation_of_cellular_response_to_insulin_stimulus	Biological Process	5	70	463	17492	0.0378177	0.225268	1.4223	2.69855	0.0107991	GNAI2//MSTN//PAK1//PRKCD//SESN3
GO:0009056	catabolic_process	Biological Process	67	2046	463	17492	0.0380979	0.225268	1.4191	1.23717	0.144708	ADPGK//ANAPC7//ANKZF1//AP2M1//APOBEC3B//ASAH1//ATXN3//BAP1//CNP//CPVL//CROT//CTSO//CYP27A1//CYP4F12//DAP//DDX5//DEDD2//DNA2//ECE1//EDC4//ENPP2//EPHX1//FOXK1//GBA2//GNPDA1//GSPT1//HEXB//IFI27//IRF8//KCTD21//LGMN//MCOLN1//MGAM//NAGA//NPC1//NRBF2//OAS2//PABPC4//PCCB//PDE8A//PIK3CB//PLD3//PRDX3//PRKAB1//PRKAG1//PRPF18//PSAP//PSMA3//PSMC3//PSMC5//PSMD13//PYGM//RNASEH1//RNF20//RNH1//RPL36A//SAT1//SNAP2…
GO:0019216	regulation_of_lipid_metabolic_process	Biological Process	17	400	463	17492	0.0382062	0.225268	1.41787	1.60564	0.0367171	ABCG1//ADM//ASAH1//ATP1A1//CD74//CRTC3//HDAC3//KLF4//LACTB//LPCAT1//MID1IP1//NRBF2//PIK3R5//PRKCD//PSAP//PTK2B//TXNRD1
GO:1903531	negative_regulation_of_secretion_by_cell	Biological Process	10	198	463	17492	0.0383479	0.225268	1.41626	1.90807	0.0215983	CARD16//CARD17//F2RL1//GBP1//GNAI2//LILRA5//NOTCH1//OSM//RAP1A//TNFRSF1B
GO:0032774	RNA_biosynthetic_process	Biological Process	25	647	463	17492	0.0384269	0.225268	1.41536	1.4598	0.0539957	BAZ2A//CPSF1//DDX5//FOS//GTF2E2//INTS5//IRF7//IWS1//KLF4//NFRKB//NOTCH1//NRBF2//NRBP1//PHRF1//PRMT5//RXRB//SMARCB1//SNRPB//STAT3//TAF4B//TAF5//TCERG1//TP53//TSC22D1//XRN2
GO:0007010	cytoskeleton_organization	Biological Process	39	1100	463	17492	0.0385565	0.225268	1.4139	1.33946	0.0842333	ACTR1B//ARHGEF2//ARPC1B//ATXN3//BCL6//CAP1//CCDC65//CETN3//CNP//CORO1A//CYLC1//DAG1//DIAPH2//DOCK2//EPB41L2//FER//FLII//FLNB//GADD45A//HDAC3//IQSEC1//LCP1//MAP4//MAP7D1//MAPKAP1//MARK3//MAST3//NEDD9//PACSIN2//PAK1//PARVG//PSTPIP2//PTK2B//RAF1//SVIL//TMSB4Y//TOR1A//TTLL1//UVRAG
GO:0001765	membrane_raft_assembly	Biological Process	2	12	463	17492	0.0387164	0.225268	1.41211	6.29662	0.00431965	FLOT1//PACSIN2
GO:0002486	antigen_processing_and_presentation_of_endogenous_peptide_antigen_via_MHC_class_I_via_ER_pathway,_TAP-independent	Biological Process	2	12	463	17492	0.0387164	0.225268	1.41211	6.29662	0.00431965	HLA-B//HLA-H
GO:0002638	negative_regulation_of_immunoglobulin_production	Biological Process	2	12	463	17492	0.0387164	0.225268	1.41211	6.29662	0.00431965	BCL6//THOC1
GO:0002730	regulation_of_dendritic_cell_cytokine_production	Biological Process	2	12	463	17492	0.0387164	0.225268	1.41211	6.29662	0.00431965	BST2//TLR4
GO:0002903	negative_regulation_of_B_cell_apoptotic_process	Biological Process	2	12	463	17492	0.0387164	0.225268	1.41211	6.29662	0.00431965	BCL6//CD74
GO:0003334	keratinocyte_development	Biological Process	2	12	463	17492	0.0387164	0.225268	1.41211	6.29662	0.00431965	FLNB//PSAP
GO:0007252	I-kappaB_phosphorylation	Biological Process	2	12	463	17492	0.0387164	0.225268	1.41211	6.29662	0.00431965	CHUK//TLR4
GO:0033148	positive_regulation_of_intracellular_estrogen_receptor_signaling_pathway	Biological Process	2	12	463	17492	0.0387164	0.225268	1.41211	6.29662	0.00431965	PAK1//WBP2
GO:0043383	negative_T_cell_selection	Biological Process	2	12	463	17492	0.0387164	0.225268	1.41211	6.29662	0.00431965	CD74//DOCK2
GO:0060742	epithelial_cell_differentiation_involved_in_prostate_gland_development	Biological Process	2	12	463	17492	0.0387164	0.225268	1.41211	6.29662	0.00431965	NOTCH1//PSAP
GO:0071352	cellular_response_to_interleukin-2	Biological Process	2	12	463	17492	0.0387164	0.225268	1.41211	6.29662	0.00431965	IL2RB//PTK2B
GO:0071803	positive_regulation_of_podosome_assembly	Biological Process	2	12	463	17492	0.0387164	0.225268	1.41211	6.29662	0.00431965	LCP1//MAPK9
GO:0097104	postsynaptic_membrane_assembly	Biological Process	2	12	463	17492	0.0387164	0.225268	1.41211	6.29662	0.00431965	NLGN3//NLGN4Y
GO:0006915	apoptotic_process	Biological Process	33	905	463	17492	0.0393053	0.228139	1.40555	1.3776	0.0712743	AIM2//AKTIP//API5//BRMS1//CASP1//CIDEB//DAP//DDX5//DEDD2//DNAJA3//EDAR//FAM32A//GADD45A//IFI27//LTBR//MOAP1//NOD1//NOTCH1//PAK1//PKN1//PPP1R15A//PRDX3//PRKCD//PTK2B//PTRH2//RAF1//THOC1//TLR4//TMBIM4//TNFRSF1B//TNIP2//TP53//YARS
GO:0010638	positive_regulation_of_organelle_organization	Biological Process	24	617	463	17492	0.039313	0.228139	1.40546	1.46955	0.0518359	ARPC1B//BAP1//BCL6//CIDEB//DNMT1//F2RL1//FER//GRN//HCK//HNRNPA2B1//LCP1//LPAR1//MAPK9//MNS1//MOAP1//PAK1//PLAUR//PTK2B//RNF20//SMARCB1//TADA2B//TP53//UVRAG//WBP2
GO:0050866	negative_regulation_of_cell_activation	Biological Process	10	199	463	17492	0.0394683	0.22874	1.40375	1.89848	0.0215983	BCL6//CD74//FER//FGL2//GLMN//GRN//MNDA//PKN1//PRKCD//THOC1
GO:0006826	iron_ion_transport	Biological Process	5	71	463	17492	0.0398347	0.230005	1.39974	2.66054	0.0107991	ATP6V0E1//ATP6V1D//ATP6V1E1//FLVCR2//MCOLN1
GO:0050767	regulation_of_neurogenesis	Biological Process	30	809	463	17492	0.0398755	0.230005	1.39929	1.40098	0.0647948	ARHGEF2//BCL6//CAMK1//CPNE1//CRK//DAG1//FIG4//GDI1//GORASP1//GRN//IFRD1//KLF4//LLPH//LPAR1//MAP2K1//MOV10//NLGN3//NOTCH1//PAK1//PLXNB2//PRMT5//PTK2B//RAP1A//RGS2//SEMA4A//SEMA4D//SERPINI1//STAT3//TNFRSF1B//TP53
GO:0045664	regulation_of_neuron_differentiation	Biological Process	25	650	463	17492	0.0402252	0.230005	1.3955	1.45307	0.0539957	ARHGEF2//BCL6//CAMK1//CPNE1//CRK//FIG4//GDI1//GORASP1//GRN//IFRD1//KLF4//LLPH//LPAR1//MAP2K1//MOV10//NLGN3//NOTCH1//PAK1//PLXNB2//PTK2B//RAP1A//RGS2//SEMA4A//SEMA4D//SERPINI1
GO:0032648	regulation_of_interferon-beta_production	Biological Process	4	49	463	17492	0.0402916	0.230005	1.39479	3.08406	0.00863931	FLOT1//IFIH1//IRF7//TLR4
GO:0006606	protein_import_into_nucleus	Biological Process	6	95	463	17492	0.0403044	0.230005	1.39465	2.38609	0.012959	NUP93//RPAIN//STAT3//TNPO3//TP53//TXNIP
GO:0030010	establishment_of_cell_polarity	Biological Process	7	120	463	17492	0.0403872	0.230005	1.39376	2.20382	0.0151188	ACTR1B//ARHGEF2//CRK//DOCK2//MAP4//PAK1//SNX27
GO:0031503	protein-containing_complex_localization	Biological Process	12	256	463	17492	0.0404592	0.230005	1.39298	1.77092	0.0259179	CPSF1//DHX38//DYNC2LI1//GLE1//HNRNPA2B1//IFT52//NUP210//NUP93//STX3//TERF2//THOC1//UPF2
GO:0001941	postsynaptic_membrane_organization	Biological Process	3	29	463	17492	0.0404667	0.230005	1.3929	3.90824	0.00647948	DNAJA3//NLGN3//NLGN4Y
GO:0006515	protein_quality_control_for_misfolded_or_incompletely_synthesized_proteins	Biological Process	3	29	463	17492	0.0404667	0.230005	1.3929	3.90824	0.00647948	ANKZF1//ATXN3//TOR1A
GO:0010743	regulation_of_macrophage_derived_foam_cell_differentiation	Biological Process	3	29	463	17492	0.0404667	0.230005	1.3929	3.90824	0.00647948	ABCG1//IL18//MAPK9
GO:0016572	histone_phosphorylation	Biological Process	3	29	463	17492	0.0404667	0.230005	1.3929	3.90824	0.00647948	BAZ1B//PKN1//PRKCD
GO:0033032	regulation_of_myeloid_cell_apoptotic_process	Biological Process	3	29	463	17492	0.0404667	0.230005	1.3929	3.90824	0.00647948	IRF7//PIK3CB//PIK3CD
GO:0035666	TRIF-dependent_toll-like_receptor_signaling_pathway	Biological Process	3	29	463	17492	0.0404667	0.230005	1.3929	3.90824	0.00647948	CHUK//IRF7//TLR4
GO:0038179	neurotrophin_signaling_pathway	Biological Process	3	29	463	17492	0.0404667	0.230005	1.3929	3.90824	0.00647948	CORO1A//RAF1//RAP1A
GO:0070570	regulation_of_neuron_projection_regeneration	Biological Process	3	29	463	17492	0.0404667	0.230005	1.3929	3.90824	0.00647948	GRN//KLF4//MAP2K1
GO:0007167	enzyme_linked_receptor_protein_signaling_pathway	Biological Process	27	714	463	17492	0.0405286	0.230061	1.39224	1.42864	0.0583153	AP2M1//ARPC1B//ATP6V0E1//ATP6V1D//ATP6V1E1//CRK//DDX5//FER//FGF16//FOS//HCK//IGF2R//MSTN//MYO1E//NAMPT//NCF4//NUP93//PAK1//PIK3CB//PTBP1//PTK2B//RAF1//RASSF2//STAT3//STAT6//TP53//TXNIP
GO:0009890	negative_regulation_of_biosynthetic_process	Biological Process	52	1540	463	17492	0.0406298	0.23034	1.39116	1.27568	0.112311	ARID4A//ATP1A1//BAP1//BAZ2A//BCL6//BRMS1//CBX3//CBX4//CLK2//CNBP//DAP//DDX5//DEDD2//DNAJA3//DNMT1//EIF2S1//FOXK1//HCFC1//HDAC3//HIF1AN//HNRNPA2B1//HPCA//IFI27//IRF7//IRF8//KLF4//LPCAT1//MOV10//NOTCH1//PARP9//PBXIP1//PHF14//PKIG//POU6F1//PRMT5//PSMC5//QARS//RAP1A//RGS2//SEMA4D//STAT3//STAT6//SUMO1//TCERG1//TERF2//THAP11//TP53//TXNIP//ZNF140//ZNF263//ZNF366//ZNF608
GO:0071702	organic_substance_transport	Biological Process	71	2194	463	17492	0.0413515	0.234131	1.38351	1.22259	0.153348	ABCB1//ABCG1//AIM2//AKTIP//AP2M1//ARFGAP2//ARHGEF2//ATP6V0E1//ATP6V1D//ATP6V1E1//CD74//CETN3//CPSF1//CROT//CTAGE1//DHX38//DYNC2LI1//F2RL1//FLOT1//FLVCR2//GDI1//GLE1//GORASP1//GRAMD1A//HNRNPA2B1//HOMER3//IFT52//IWS1//MCOLN1//MID1IP1//NASP//NOTCH1//NPC1//NUP210//NUP93//PEX5//PSAP//RAB20//RAF1//RPAIN//RPL36A//RUFY1//SEC16A//SEC23B//SEC24C//SLC15A2//SLC17A1//SLC25A41//SLC2A3//SLC35A5//SLC35B3//SLC35D…
GO:1903507	negative_regulation_of_nucleic_acid-templated_transcription	Biological Process	43	1240	463	17492	0.0418204	0.234758	1.37861	1.3101	0.0928726	ARID4A//BAP1//BAZ2A//BCL6//BRMS1//CBX3//CBX4//CNBP//DAP//DDX5//DEDD2//DNAJA3//DNMT1//FOXK1//HCFC1//HDAC3//HIF1AN//HNRNPA2B1//IFI27//IRF7//IRF8//KLF4//NOTCH1//PARP9//PBXIP1//PHF14//PKIG//POU6F1//PRMT5//PSMC5//QARS//SEMA4D//STAT3//STAT6//SUMO1//TCERG1//THAP11//TP53//TXNIP//ZNF140//ZNF263//ZNF366//ZNF608
GO:1902036	regulation_of_hematopoietic_stem_cell_differentiation	Biological Process	5	72	463	17492	0.0419159	0.234758	1.37762	2.62359	0.0107991	OSM//PSMA3//PSMC3//PSMC5//PSMD13
GO:2001023	regulation_of_response_to_drug	Biological Process	6	96	463	17492	0.042074	0.234758	1.37599	2.36123	0.012959	PDE8A//PRMT5//PSAP//RGS2//TOR1A//TP53
GO:0071347	cellular_response_to_interleukin-1	Biological Process	9	174	463	17492	0.0422545	0.234758	1.37413	1.95412	0.0194384	CHUK//GBP1//MAP3K8//NOD1//PSMA3//PSMC3//PSMC5//PSMD13//TNIP2
GO:1902679	negative_regulation_of_RNA_biosynthetic_process	Biological Process	43	1242	463	17492	0.0427362	0.234758	1.3692	1.30799	0.0928726	ARID4A//BAP1//BAZ2A//BCL6//BRMS1//CBX3//CBX4//CNBP//DAP//DDX5//DEDD2//DNAJA3//DNMT1//FOXK1//HCFC1//HDAC3//HIF1AN//HNRNPA2B1//IFI27//IRF7//IRF8//KLF4//NOTCH1//PARP9//PBXIP1//PHF14//PKIG//POU6F1//PRMT5//PSMC5//QARS//SEMA4D//STAT3//STAT6//SUMO1//TCERG1//THAP11//TP53//TXNIP//ZNF140//ZNF263//ZNF366//ZNF608
GO:0002011	morphogenesis_of_an_epithelial_sheet	Biological Process	4	50	463	17492	0.0429147	0.234758	1.36739	3.02238	0.00863931	DAG1//LCP1//NOTCH1//TOR1A
GO:0032757	positive_regulation_of_interleukin-8_production	Biological Process	4	50	463	17492	0.0429147	0.234758	1.36739	3.02238	0.00863931	CD74//F2RL1//FCN1//TLR4
GO:0046632	alpha-beta_T_cell_differentiation	Biological Process	4	50	463	17492	0.0429147	0.234758	1.36739	3.02238	0.00863931	IRF4//SEMA4A//STAT3//STAT6
GO:0050663	cytokine_secretion	Biological Process	4	50	463	17492	0.0429147	0.234758	1.36739	3.02238	0.00863931	AIM2//F2RL1//NOTCH1//TLR4
GO:1904645	response_to_amyloid-beta	Biological Process	4	50	463	17492	0.0429147	0.234758	1.36739	3.02238	0.00863931	ATP1A3//LGMN//NAMPT//TLR4
GO:1990090	cellular_response_to_nerve_growth_factor_stimulus	Biological Process	4	50	463	17492	0.0429147	0.234758	1.36739	3.02238	0.00863931	CORO1A//CRK//EEF2//RAP1A
GO:0006611	protein_export_from_nucleus	Biological Process	8	148	463	17492	0.0433574	0.234758	1.36294	2.04215	0.0172786	CPSF1//DHX38//GLE1//HNRNPA2B1//NUP210//NUP93//THOC1//UPF2
GO:1902903	regulation_of_supramolecular_fiber_organization	Biological Process	15	347	463	17492	0.0437941	0.234758	1.35858	1.63313	0.0323974	ARHGEF2//ARPC1B//CORO1A//F2RL1//FER//GBA2//GMFG//HCK//LPAR1//MID1IP1//PAK1//PRKCD//PTK2B//RDX//TMSB4Y
GO:0001916	positive_regulation_of_T_cell_mediated_cytotoxicity	Biological Process	3	30	463	17492	0.0441077	0.234758	1.35549	3.77797	0.00647948	HLA-B//HLA-H//PVR
GO:0010165	response_to_X-ray	Biological Process	3	30	463	17492	0.0441077	0.234758	1.35549	3.77797	0.00647948	KARS//TP53//XRCC4
GO:0035066	positive_regulation_of_histone_acetylation	Biological Process	3	30	463	17492	0.0441077	0.234758	1.35549	3.77797	0.00647948	SMARCB1//TADA2B//WBP2
GO:0045948	positive_regulation_of_translational_initiation	Biological Process	3	30	463	17492	0.0441077	0.234758	1.35549	3.77797	0.00647948	DHX29//HABP4//PPP1R15A
GO:0050690	regulation_of_defense_response_to_virus_by_virus	Biological Process	3	30	463	17492	0.0441077	0.234758	1.35549	3.77797	0.00647948	AP2M1//DOCK2//HCK
GO:1902895	positive_regulation_of_pri-miRNA_transcription_by_RNA_polymerase_II	Biological Process	3	30	463	17492	0.0441077	0.234758	1.35549	3.77797	0.00647948	FOS//STAT3//TP53
GO:0007163	establishment_or_maintenance_of_cell_polarity	Biological Process	10	203	463	17492	0.0441744	0.234758	1.35483	1.86107	0.0215983	ACTR1B//ARHGEF2//CAP1//CRK//DOCK2//MAP4//MAPKAP1//PAK1//PARVG//SNX27
GO:0001771	immunological_synapse_formation	Biological Process	2	13	463	17492	0.0449696	0.234758	1.34708	5.81226	0.00431965	CORO1A//DOCK2
GO:0001845	phagolysosome_assembly	Biological Process	2	13	463	17492	0.0449696	0.234758	1.34708	5.81226	0.00431965	CORO1A//RAB20
GO:0002476	antigen_processing_and_presentation_of_endogenous_peptide_antigen_via_MHC_class_Ib	Biological Process	2	13	463	17492	0.0449696	0.234758	1.34708	5.81226	0.00431965	HLA-B//HLA-H
GO:0010737	protein_kinase_A_signaling	Biological Process	2	13	463	17492	0.0449696	0.234758	1.34708	5.81226	0.00431965	LCP1//RDX
GO:0014842	regulation_of_skeletal_muscle_satellite_cell_proliferation	Biological Process	2	13	463	17492	0.0449696	0.234758	1.34708	5.81226	0.00431965	MSTN//STAT3
GO:0030007	cellular_potassium_ion_homeostasis	Biological Process	2	13	463	17492	0.0449696	0.234758	1.34708	5.81226	0.00431965	ATP1A1//ATP1A3
GO:0031665	negative_regulation_of_lipopolysaccharide-mediated_signaling_pathway	Biological Process	2	13	463	17492	0.0449696	0.234758	1.34708	5.81226	0.00431965	CARD16//LILRA2
GO:0035723	interleukin-15-mediated_signaling_pathway	Biological Process	2	13	463	17492	0.0449696	0.234758	1.34708	5.81226	0.00431965	IL2RB//STAT3
GO:0036376	sodium_ion_export_across_plasma_membrane	Biological Process	2	13	463	17492	0.0449696	0.234758	1.34708	5.81226	0.00431965	ATP1A1//ATP1A3
GO:0038180	nerve_growth_factor_signaling_pathway	Biological Process	2	13	463	17492	0.0449696	0.234758	1.34708	5.81226	0.00431965	CORO1A//RAP1A
GO:0039694	viral_RNA_genome_replication	Biological Process	2	13	463	17492	0.0449696	0.234758	1.34708	5.81226	0.00431965	PI4KA//SMARCB1
GO:0045416	positive_regulation_of_interleukin-8_biosynthetic_process	Biological Process	2	13	463	17492	0.0449696	0.234758	1.34708	5.81226	0.00431965	CD74//TLR4
GO:0047484	regulation_of_response_to_osmotic_stress	Biological Process	2	13	463	17492	0.0449696	0.234758	1.34708	5.81226	0.00431965	ABCB1//ARHGEF2
GO:0055119	relaxation_of_cardiac_muscle	Biological Process	2	13	463	17492	0.0449696	0.234758	1.34708	5.81226	0.00431965	ATP1A1//RGS2
GO:0070669	response_to_interleukin-2	Biological Process	2	13	463	17492	0.0449696	0.234758	1.34708	5.81226	0.00431965	IL2RB//PTK2B
GO:0090110	COPII-coated_vesicle_cargo_loading	Biological Process	2	13	463	17492	0.0449696	0.234758	1.34708	5.81226	0.00431965	SEC23B//SEC24C
GO:0090239	regulation_of_histone_H4_acetylation	Biological Process	2	13	463	17492	0.0449696	0.234758	1.34708	5.81226	0.00431965	IWS1//SMARCB1
GO:0097320	plasma_membrane_tubulation	Biological Process	2	13	463	17492	0.0449696	0.234758	1.34708	5.81226	0.00431965	BIN2//PACSIN2
GO:0150079	negative_regulation_of_neuroinflammatory_response	Biological Process	2	13	463	17492	0.0449696	0.234758	1.34708	5.81226	0.00431965	GRN//TNFRSF1B
GO:1904424	regulation_of_GTP_binding	Biological Process	2	13	463	17492	0.0449696	0.234758	1.34708	5.81226	0.00431965	EIF2S1//PBXIP1
GO:0006282	regulation_of_DNA_repair	Biological Process	7	123	463	17492	0.0451471	0.234758	1.34537	2.15006	0.0151188	AXIN2//PARG//PARP9//PPP4C//TERF2//UBR5//WRNIP1
GO:0043620	regulation_of_DNA-templated_transcription_in_response_to_stress	Biological Process	7	123	463	17492	0.0451471	0.234758	1.34537	2.15006	0.0151188	HIF1AN//NOTCH1//PSMA3//PSMC3//PSMC5//PSMD13//TP53
GO:0006397	mRNA_processing	Biological Process	19	470	463	17492	0.0453169	0.234758	1.34374	1.52726	0.0410367	CHERP//CPSF1//DDX42//DDX5//DHX38//HABP4//HNRNPA2B1//IWS1//JMJD6//PHRF1//PRMT5//PRPF18//PTBP1//RBMX2//SNRPB//SNRPN//THOC1//WBP4//XRN2
GO:0045595	regulation_of_cell_differentiation	Biological Process	59	1791	463	17492	0.0455597	0.234758	1.34142	1.24456	0.12743	ABCG1//ADAM8//ADM//ARHGEF2//AXIN2//BCL6//CAMK1//CD53//CD74//CPNE1//CRK//DAG1//DDX5//DNMT1//FGL2//FIG4//FLOT1//FOS//GBP1//GDI1//GORASP1//GRN//HDAC3//HIF1AN//IFRD1//IL18//IRF4//IRF7//KLF4//LLPH//LPAR1//MAP2K1//MAPK9//MOV10//MSTN//NEDD9//NLGN3//NOTCH1//OSM//PAK1//PLXNB2//PRMT5//PSMA3//PSMC3//PSMC5//PSMD13//PTBP1//PTK2B//RAF1//RAP1A//RASSF2//RGS2//SEMA4A//SEMA4D//SERPINI1//STAT3//TLR4//TNFRSF1B//TP53
GO:0019886	antigen_processing_and_presentation_of_exogenous_peptide_antigen_via_MHC_class_II	Biological Process	6	98	463	17492	0.0457581	0.234758	1.33953	2.31304	0.012959	ACTR1B//AP2M1//CD74//DCTN5//LGMN//SEC24C
GO:0043488	regulation_of_mRNA_stability	Biological Process	9	177	463	17492	0.046231	0.234758	1.33507	1.921	0.0194384	AXIN2//MOV10//PABPC4//PRKCD//PSMA3//PSMC3//PSMC5//PSMD13//TNFSF13
GO:0051224	negative_regulation_of_protein_transport	Biological Process	9	177	463	17492	0.046231	0.234758	1.33507	1.921	0.0194384	CARD16//CARD17//CSK//F2RL1//GBP1//GDI1//LILRA5//PKIG//RANGAP1
GO:0034103	regulation_of_tissue_remodeling	Biological Process	5	74	463	17492	0.046272	0.234758	1.33468	2.55268	0.0107991	ADAM8//CSK//IL18//TMBIM1//TP53
GO:0043627	response_to_estrogen	Biological Process	5	74	463	17492	0.046272	0.234758	1.33468	2.55268	0.0107991	ARPC1B//MSTN//TRIM25//WBP2//ZNF366
GO:0019439	aromatic_compound_catabolic_process	Biological Process	18	442	463	17492	0.0475661	0.234758	1.3227	1.53854	0.0388769	APOBEC3B//CNP//DDX5//DEDD2//DNA2//EDC4//EPHX1//GSPT1//OAS2//PABPC4//PDE8A//PRPF18//RNASEH1//RNH1//RPL36A//UNG//UPF2//XRN2
GO:0002695	negative_regulation_of_leukocyte_activation	Biological Process	9	178	463	17492	0.04761	0.234758	1.3223	1.91021	0.0194384	BCL6//CD74//FER//FGL2//GLMN//GRN//MNDA//PKN1//THOC1
GO:0031345	negative_regulation_of_cell_projection_organization	Biological Process	9	178	463	17492	0.04761	0.234758	1.3223	1.91021	0.0194384	GDI1//GORASP1//IFRD1//LPAR1//MAP4//NLGN3//PRKCD//SEMA4A//SEMA4D
GO:0002495	antigen_processing_and_presentation_of_peptide_antigen_via_MHC_class_II	Biological Process	6	99	463	17492	0.047673	0.234758	1.32173	2.28968	0.012959	ACTR1B//AP2M1//CD74//DCTN5//LGMN//SEC24C
GO:0002504	antigen_processing_and_presentation_of_peptide_or_polysaccharide_antigen_via_MHC_class_II	Biological Process	6	99	463	17492	0.047673	0.234758	1.32173	2.28968	0.012959	ACTR1B//AP2M1//CD74//DCTN5//LGMN//SEC24C
GO:0006998	nuclear_envelope_organization	Biological Process	4	52	463	17492	0.0484428	0.234758	1.31477	2.90613	0.00863931	NUP93//TMEM43//TOR1A//TOR1B
GO:0006766	vitamin_metabolic_process	Biological Process	7	125	463	17492	0.0485123	0.234758	1.31415	2.11566	0.0151188	BTD//CYP27A1//CYP4F12//LGMN//PCCB//SLC2A3//VNN2
GO:0001910	regulation_of_leukocyte_mediated_cytotoxicity	Biological Process	5	75	463	17492	0.0485472	0.234758	1.31384	2.51865	0.0107991	CRK//F2RL1//HLA-B//HLA-H//PVR
GO:1900407	regulation_of_cellular_response_to_oxidative_stress	Biological Process	5	75	463	17492	0.0485472	0.234758	1.31384	2.51865	0.0107991	MAPKAP1//PDE8A//PSAP//TLR4//TP53
GO:0000398	mRNA_splicing,_via_spliceosome	Biological Process	13	293	463	17492	0.0488628	0.234758	1.31102	1.67623	0.0280778	CHERP//CPSF1//DDX42//DDX5//DHX38//HNRNPA2B1//PRMT5//PRPF18//PTBP1//RBMX2//SNRPB//SNRPN//WBP4
GO:0000187	activation_of_MAPK_activity	Biological Process	8	152	463	17492	0.0493536	0.234758	1.30668	1.98841	0.0172786	CD74//KARS//LPAR1//MAP2K1//NOD1//PIK3CB//PKN1//TLR4
GO:0042113	B_cell_activation	Biological Process	8	152	463	17492	0.0493536	0.234758	1.30668	1.98841	0.0172786	BCL6//BST2//PIK3CD//PRKCD//PTK2B//TLR4//TP53//UNG
GO:0006900	vesicle_budding_from_membrane	Biological Process	6	100	463	17492	0.0496368	0.234758	1.3042	2.26678	0.012959	AP2M1//ARFGAP2//GORASP1//SEC16A//SEC23B//SEC24C
GO:0052548	regulation_of_endopeptidase_activity	Biological Process	17	414	463	17492	0.0498735	0.234758	1.30213	1.55134	0.0367171	AIM2//BST2//CARD16//CARD17//CASP1//CIDEB//DAP//HSPE1//KLF4//LGMN//NOD1//PLAUR//PRDX3//PSMA3//RAF1//SERPINI1//STAT3
GO:0051248	negative_regulation_of_protein_metabolic_process	Biological Process	38	1090	463	17492	0.0502186	0.234758	1.29914	1.31709	0.0820734	BST2//CAMK2N2//CARD16//CARD17//CSK//DAG1//DNAJA1//DNMT1//EIF2S1//F2RL1//GADD45A//GBP1//GLMN//GMFG//GNAI2//HDAC3//KLF4//LRRK1//MOV10//PKIG//PKN1//PLAUR//PPP1R15A//PRDX3//PRKCD//QARS//RAF1//RASSF2//RGS2//SEMA4D//SERPINI1//SMARCB1//STAT3//STK38//TLR4//TP53//TRIM21//UBR5
GO:0071375	cellular_response_to_peptide_hormone_stimulus	Biological Process	12	265	463	17492	0.0502246	0.234758	1.29908	1.71078	0.0259179	ATP6V0E1//ATP6V1D//ATP6V1E1//CRK//CSK//FER//NAMPT//PAK1//PRKCD//RANGAP1//STAT3//STAT6
GO:0032388	positive_regulation_of_intracellular_transport	Biological Process	10	208	463	17492	0.050575	0.234758	1.29606	1.81633	0.0215983	BAP1//CAMK1//HDAC3//HPCA//PAK1//PRKCD//RDX//SEC16A//TP53//UBR5
GO:0001912	positive_regulation_of_leukocyte_mediated_cytotoxicity	Biological Process	4	53	463	17492	0.0513473	0.234758	1.28948	2.8513	0.00863931	F2RL1//HLA-B//HLA-H//PVR
GO:0002711	positive_regulation_of_T_cell_mediated_immunity	Biological Process	4	53	463	17492	0.0513473	0.234758	1.28948	2.8513	0.00863931	HLA-B//HLA-H//IL18//PVR
GO:0030101	natural_killer_cell_activation	Biological Process	4	53	463	17492	0.0513473	0.234758	1.28948	2.8513	0.00863931	CORO1A//IL18//PIK3CD//SNX27
GO:1990089	response_to_nerve_growth_factor	Biological Process	4	53	463	17492	0.0513473	0.234758	1.28948	2.8513	0.00863931	CORO1A//CRK//EEF2//RAP1A
GO:0002829	negative_regulation_of_type_2_immune_response	Biological Process	2	14	463	17492	0.0515653	0.234758	1.28764	5.3971	0.00431965	BCL6//STAT6
GO:0009214	cyclic_nucleotide_catabolic_process	Biological Process	2	14	463	17492	0.0515653	0.234758	1.28764	5.3971	0.00431965	CNP//PDE8A
GO:0010248	establishment_or_maintenance_of_transmembrane_electrochemical_gradient	Biological Process	2	14	463	17492	0.0515653	0.234758	1.28764	5.3971	0.00431965	ATP1A1//ATP1A3
GO:0032461	positive_regulation_of_protein_oligomerization	Biological Process	2	14	463	17492	0.0515653	0.234758	1.28764	5.3971	0.00431965	AIM2//TP53
GO:0034356	NAD_biosynthesis_via_nicotinamide_riboside_salvage_pathway	Biological Process	2	14	463	17492	0.0515653	0.234758	1.28764	5.3971	0.00431965	NAMPT//PARP9
GO:0035886	vascular_smooth_muscle_cell_differentiation	Biological Process	2	14	463	17492	0.0515653	0.234758	1.28764	5.3971	0.00431965	ADM//NOTCH1
GO:0043201	response_to_leucine	Biological Process	2	14	463	17492	0.0515653	0.234758	1.28764	5.3971	0.00431965	RRAGD//SESN3
GO:0045086	positive_regulation_of_interleukin-2_biosynthetic_process	Biological Process	2	14	463	17492	0.0515653	0.234758	1.28764	5.3971	0.00431965	GLMN//IRF4
GO:0045989	positive_regulation_of_striated_muscle_contraction	Biological Process	2	14	463	17492	0.0515653	0.234758	1.28764	5.3971	0.00431965	ATP1A1//RGS2
GO:0060397	growth_hormone_receptor_signaling_pathway_via_JAK-STAT	Biological Process	2	14	463	17492	0.0515653	0.234758	1.28764	5.3971	0.00431965	STAT3//STAT6
GO:0070234	positive_regulation_of_T_cell_apoptotic_process	Biological Process	2	14	463	17492	0.0515653	0.234758	1.28764	5.3971	0.00431965	ADAM8//TP53
GO:0070672	response_to_interleukin-15	Biological Process	2	14	463	17492	0.0515653	0.234758	1.28764	5.3971	0.00431965	IL2RB//STAT3
GO:0070986	left|right_axis_specification	Biological Process	2	14	463	17492	0.0515653	0.234758	1.28764	5.3971	0.00431965	MNS1//NOTCH1
GO:0097202	activation_of_cysteine-type_endopeptidase_activity	Biological Process	2	14	463	17492	0.0515653	0.234758	1.28764	5.3971	0.00431965	CIDEB//LGMN
GO:1901201	regulation_of_extracellular_matrix_assembly	Biological Process	2	14	463	17492	0.0515653	0.234758	1.28764	5.3971	0.00431965	DAG1//NOTCH1
GO:2000615	regulation_of_histone_H3-K9_acetylation	Biological Process	2	14	463	17492	0.0515653	0.234758	1.28764	5.3971	0.00431965	CAMK1//SMARCB1
GO:0002224	toll-like_receptor_signaling_pathway	Biological Process	6	101	463	17492	0.0516496	0.234758	1.28693	2.24434	0.012959	CHUK//IRF7//LGMN//TLR10//TLR4//TNIP2
GO:0045597	positive_regulation_of_cell_differentiation	Biological Process	34	960	463	17492	0.0516962	0.234758	1.28654	1.33803	0.0734341	ADAM8//ADM//ARHGEF2//AXIN2//BCL6//CAMK1//CD53//CD74//CPNE1//CRK//DAG1//FIG4//FLOT1//FOS//GDI1//GRN//HIF1AN//IL18//LLPH//LPAR1//MAP2K1//MAPK9//NEDD9//NOTCH1//PAK1//PLXNB2//PRMT5//PTK2B//RAP1A//RGS2//SEMA4D//SERPINI1//STAT3//TNFRSF1B
GO:0002756	MyD88-independent_toll-like_receptor_signaling_pathway	Biological Process	3	32	463	17492	0.0518593	0.234758	1.28517	3.54185	0.00647948	CHUK//IRF7//TLR4
GO:0010543	regulation_of_platelet_activation	Biological Process	3	32	463	17492	0.0518593	0.234758	1.28517	3.54185	0.00647948	PRKCD//TEC//TLR4
GO:0034105	positive_regulation_of_tissue_remodeling	Biological Process	3	32	463	17492	0.0518593	0.234758	1.28517	3.54185	0.00647948	ADAM8//IL18//TMBIM1
GO:0035456	response_to_interferon-beta	Biological Process	3	32	463	17492	0.0518593	0.234758	1.28517	3.54185	0.00647948	AIM2//BST2//MNDA
GO:0043267	negative_regulation_of_potassium_ion_transport	Biological Process	3	32	463	17492	0.0518593	0.234758	1.28517	3.54185	0.00647948	CAB39//PTK2B//SUMO1
GO:0048821	erythrocyte_development	Biological Process	3	32	463	17492	0.0518593	0.234758	1.28517	3.54185	0.00647948	ARID4A//BCL6//JMJD6
GO:0097028	dendritic_cell_differentiation	Biological Process	3	32	463	17492	0.0518593	0.234758	1.28517	3.54185	0.00647948	F2RL1//IRF4//LTBR
GO:0098586	cellular_response_to_virus	Biological Process	3	32	463	17492	0.0518593	0.234758	1.28517	3.54185	0.00647948	CHUK//IFIH1//IRF7
GO:0150077	regulation_of_neuroinflammatory_response	Biological Process	3	32	463	17492	0.0518593	0.234758	1.28517	3.54185	0.00647948	GRN//IL18//TNFRSF1B
GO:0008217	regulation_of_blood_pressure	Biological Process	9	181	463	17492	0.0519099	0.234758	1.28475	1.87855	0.0194384	ACSM3//ADM//ATP1A1//CORIN//CYP4F12//ECE1//F2RL1//NAMPT//RNPEP
GO:0030308	negative_regulation_of_cell_growth	Biological Process	9	181	463	17492	0.0519099	0.234758	1.28475	1.87855	0.0194384	BCL6//BST2//IFRD1//NDRG3//PAK1//RGS2//SEMA4A//SEMA4D//TP53
GO:0050864	regulation_of_B_cell_activation	Biological Process	10	209	463	17492	0.0519255	0.234758	1.28462	1.80764	0.0215983	BCL6//BST1//CD74//MNDA//PKN1//STAT6//THOC1//TLR4//TNFSF13//TNIP2
GO:0042060	wound_healing	Biological Process	19	478	463	17492	0.0519886	0.234758	1.28409	1.5017	0.0410367	DAG1//DOCK9//F2RL1//FERMT3//IFRD1//ITPR2//LCP1//MSTN//NOTCH1//PABPC4//PAK1//PIK3CB//PIK3R5//PLAUR//PRKCD//RAF1//TEC//TOR1A//TP53
GO:0045727	positive_regulation_of_translation	Biological Process	7	127	463	17492	0.0520331	0.234758	1.28372	2.08235	0.0151188	CNBP//DHX29//EEF2//HABP4//NGRN//PPP1R15A//PTK2B
GO:0031328	positive_regulation_of_cellular_biosynthetic_process	Biological Process	64	1979	463	17492	0.0520781	0.234758	1.28334	1.22178	0.138229	ADM//ARHGEF2//ARID4A//CALCOCO1//CAMK1//CD74//CHUK//CNBP//CRTC3//DHX29//DNA2//EEF2//ELK1//F2RL1//FOS//FOXK1//GLMN//HABP4//HCFC1//HDAC3//HEXB//HMGN3//HNRNPA2B1//HNRNPAB//IL18//IRF4//IRF7//IRF8//JMJD6//KARS//KLF4//MAP2K1//MID1IP1//MSTN//NAMPT//NGRN//NOTCH1//OSM//PARP9//PKN1//PPP1R15A//PRKCD//PSMC3//PSMC5//PTK2B//RAF1//RNF20//RXRB//SMARCB1//SMARCD2//STAT3//STAT6//TADA2B//TAF4B//TCERG1//THOC1//TLR4//T…
GO:0000375	RNA_splicing,_via_transesterification_reactions	Biological Process	13	296	463	17492	0.0521839	0.234758	1.28246	1.65924	0.0280778	CHERP//CPSF1//DDX42//DDX5//DHX38//HNRNPA2B1//PRMT5//PRPF18//PTBP1//RBMX2//SNRPB//SNRPN//WBP4
GO:0010721	negative_regulation_of_cell_development	Biological Process	14	326	463	17492	0.0525209	0.235784	1.27967	1.62244	0.0302376	ARHGEF2//GBP1//GDI1//GORASP1//IFRD1//LPAR1//NLGN3//NOTCH1//PAK1//RGS2//SEMA4A//SEMA4D//STAT3//TP53
GO:0045454	cell_redox_homeostasis	Biological Process	5	77	463	17492	0.0532928	0.238765	1.27333	2.45323	0.0107991	NCF4//PDIA6//PRDX3//QSOX2//TXNRD1
GO:0048477	oogenesis	Biological Process	5	77	463	17492	0.0532928	0.238765	1.27333	2.45323	0.0107991	DIAPH2//HEXB//HORMAD1//PTK2B//TAF4B
GO:0021549	cerebellum_development	Biological Process	6	102	463	17492	0.0537116	0.240154	1.26993	2.22234	0.012959	CRK//LPAR1//MAP2K1//PAK1//SDF4//TP53
GO:0051153	regulation_of_striated_muscle_cell_differentiation	Biological Process	6	102	463	17492	0.0537116	0.240154	1.26993	2.22234	0.012959	CD53//FLOT1//HDAC3//NOTCH1//PAK1//RGS2
GO:0060968	regulation_of_gene_silencing	Biological Process	7	128	463	17492	0.0538521	0.24054	1.2688	2.06608	0.0151188	DDX5//DNMT1//MAP2K1//NUP210//NUP93//STAT3//TP53
GO:0045661	regulation_of_myoblast_differentiation	Biological Process	4	54	463	17492	0.0543451	0.242497	1.26484	2.7985	0.00863931	HIF1AN//IL18//MSTN//NOTCH1
GO:0042493	response_to_drug	Biological Process	35	998	463	17492	0.0547371	0.244	1.26172	1.32494	0.075594	ABCB1//AIM2//ANKZF1//ARHGEF2//ATP1A1//CBX3//CHRNA2//CHUK//CRK//EEF2//FOS//GNAI2//GRIN3A//HPCA//ITPR2//KLF4//MSTN//NOD1//NOTCH1//NPC1//PRDX3//PRKCD//PTK2B//RAP1A//RGS2//RPN2//SDF4//SLC25A41//SRP68//STAT3//STAT6//TP53//TXNIP//WBP2//XPC
GO:0050821	protein_stabilization	Biological Process	9	183	463	17492	0.0549135	0.244539	1.26032	1.85802	0.0194384	FLOT1//GRN//HCFC1//PRKCD//RASSF2//SEC16A//SUMO1//TNIP2//TP53
GO:0048194	Golgi_vesicle_budding	Biological Process	5	78	463	17492	0.0557631	0.246492	1.25365	2.42178	0.0107991	ARFGAP2//GORASP1//SEC16A//SEC23B//SEC24C
GO:0060627	regulation_of_vesicle-mediated_transport	Biological Process	21	545	463	17492	0.0557658	0.246492	1.25363	1.45573	0.0453564	CORO1A//CSK//DOCK2//F2RL1//FER//FLOT1//GNAI2//GRIN3A//HCK//HPCA//IL2RB//MAP2K1//NLGN3//NOTCH1//PACSIN2//PIK3CB//RAB20//RAP1A//RDX//RUFY1//TOR1A
GO:0007041	lysosomal_transport	Biological Process	6	103	463	17492	0.0558229	0.246492	1.25319	2.20076	0.012959	AKTIP//GRN//IGF2R//NPC1//PSAP//SNX27
GO:0010594	regulation_of_endothelial_cell_migration	Biological Process	8	156	463	17492	0.0558636	0.246492	1.25287	1.93742	0.0172786	AAMP//FGF16//GRN//KLF4//LGMN//NOTCH1//PTK2B//SEMA4A
GO:0016486	peptide_hormone_processing	Biological Process	3	33	463	17492	0.0559651	0.246492	1.25208	3.43452	0.00647948	CORIN//ECE1//PCSK7
GO:0034405	response_to_fluid_shear_stress	Biological Process	3	33	463	17492	0.0559651	0.246492	1.25208	3.43452	0.00647948	HDAC3//KLF4//PTK2B
GO:0045920	negative_regulation_of_exocytosis	Biological Process	3	33	463	17492	0.0559651	0.246492	1.25208	3.43452	0.00647948	GNAI2//NOTCH1//RAP1A
GO:0055078	sodium_ion_homeostasis	Biological Process	3	33	463	17492	0.0559651	0.246492	1.25208	3.43452	0.00647948	ATP1A1//ATP1A3//CYP4F12
GO:0071108	protein_K48-linked_deubiquitination	Biological Process	3	33	463	17492	0.0559651	0.246492	1.25208	3.43452	0.00647948	ATXN3//BAP1//USP5
GO:1904707	positive_regulation_of_vascular_smooth_muscle_cell_proliferation	Biological Process	3	33	463	17492	0.0559651	0.246492	1.25208	3.43452	0.00647948	DNMT1//GNAI2//PAK1
GO:2000758	positive_regulation_of_peptidyl-lysine_acetylation	Biological Process	3	33	463	17492	0.0559651	0.246492	1.25208	3.43452	0.00647948	SMARCB1//TADA2B//WBP2
GO:0010611	regulation_of_cardiac_muscle_hypertrophy	Biological Process	4	55	463	17492	0.0574357	0.251071	1.24082	2.74761	0.00863931	NOTCH1//PAK1//RGS2//TNFRSF1B
GO:0042306	regulation_of_protein_import_into_nucleus	Biological Process	4	55	463	17492	0.0574357	0.251071	1.24082	2.74761	0.00863931	HDAC3//PKIG//PRKCD//UBR5
GO:0046854	phosphatidylinositol_phosphorylation	Biological Process	4	55	463	17492	0.0574357	0.251071	1.24082	2.74761	0.00863931	PI4KA//PI4KB//PIK3CB//PIK3CD
GO:0050671	positive_regulation_of_lymphocyte_proliferation	Biological Process	7	130	463	17492	0.0576085	0.251071	1.23951	2.03429	0.0151188	BCL6//BST1//CD74//CORO1A//DNAJA3//IL18//TLR4
GO:0000018	regulation_of_DNA_recombination	Biological Process	6	104	463	17492	0.0579836	0.251071	1.23669	2.1796	0.012959	BCL6//PPP4C//STAT6//TERF2//THOC1//TNFSF13
GO:0051403	stress-activated_MAPK_cascade	Biological Process	6	104	463	17492	0.0579836	0.251071	1.23669	2.1796	0.012959	CHUK//MAP3K8//MAPK9//NOD1//PKN1//TNIP2
GO:0006110	regulation_of_glycolytic_process	Biological Process	5	79	463	17492	0.0582985	0.251071	1.23434	2.39112	0.0107991	NUP210//NUP93//PRKAG1//STAT3//TP53
GO:0006446	regulation_of_translational_initiation	Biological Process	5	79	463	17492	0.0582985	0.251071	1.23434	2.39112	0.0107991	DHX29//EIF2S1//GLE1//HABP4//PPP1R15A
GO:0046907	intracellular_transport	Biological Process	50	1510	463	17492	0.0583659	0.251071	1.23384	1.25098	0.107991	ABCG1//ACTR1B//AKTIP//ANP32C//AP2M1//ARFGAP2//ARHGEF2//CAMK1//CD74//CORO1A//CPSF1//CROT//CTAGE1//DCTN5//DHX38//DYNC2LI1//GLE1//GORASP1//HNRNPA2B1//HOMER3//IFT52//MID1IP1//NPC1//NRBP1//NUP210//NUP93//PEX5//PIK3CD//PRKAG1//RAB20//RPAIN//RPL36A//SEC16A//SEC23B//SEC24C//SNAP23//SNRPB//SNX27//SRP68//STAT3//STX11//STX3//TBC1D22B//TERF2//THOC1//TNPO3//TP53//TXNIP//UPF2//ZDHHC18
GO:0010759	positive_regulation_of_macrophage_chemotaxis	Biological Process	2	15	463	17492	0.058481	0.251071	1.23299	5.03729	0.00431965	KARS//MSTN
GO:0014857	regulation_of_skeletal_muscle_cell_proliferation	Biological Process	2	15	463	17492	0.058481	0.251071	1.23299	5.03729	0.00431965	MSTN//STAT3
GO:0015936	coenzyme_A_metabolic_process	Biological Process	2	15	463	17492	0.058481	0.251071	1.23299	5.03729	0.00431965	CROT//PANK4
GO:0016082	synaptic_vesicle_priming	Biological Process	2	15	463	17492	0.058481	0.251071	1.23299	5.03729	0.00431965	SNAP23//SNAP29
GO:0033145	positive_regulation_of_intracellular_steroid_hormone_receptor_signaling_pathway	Biological Process	2	15	463	17492	0.058481	0.251071	1.23299	5.03729	0.00431965	PAK1//WBP2
GO:0034111	negative_regulation_of_homotypic_cell-cell_adhesion	Biological Process	2	15	463	17492	0.058481	0.251071	1.23299	5.03729	0.00431965	PRKCD//RDX
GO:0035627	ceramide_transport	Biological Process	2	15	463	17492	0.058481	0.251071	1.23299	5.03729	0.00431965	ABCB1//PSAP
GO:0042359	vitamin_D_metabolic_process	Biological Process	2	15	463	17492	0.058481	0.251071	1.23299	5.03729	0.00431965	CYP27A1//LGMN
GO:0045410	positive_regulation_of_interleukin-6_biosynthetic_process	Biological Process	2	15	463	17492	0.058481	0.251071	1.23299	5.03729	0.00431965	CD74//STAT3
GO:0048569	post-embryonic_animal_organ_development	Biological Process	2	15	463	17492	0.058481	0.251071	1.23299	5.03729	0.00431965	KLF4//MYO1E
GO:0050713	negative_regulation_of_interleukin-1_beta_secretion	Biological Process	2	15	463	17492	0.058481	0.251071	1.23299	5.03729	0.00431965	CARD16//CARD17
GO:0051044	positive_regulation_of_membrane_protein_ectodomain_proteolysis	Biological Process	2	15	463	17492	0.058481	0.251071	1.23299	5.03729	0.00431965	ADAM8//TNFRSF1B
GO:0051770	positive_regulation_of_nitric-oxide_synthase_biosynthetic_process	Biological Process	2	15	463	17492	0.058481	0.251071	1.23299	5.03729	0.00431965	NAMPT//TLR4
GO:0060055	angiogenesis_involved_in_wound_healing	Biological Process	2	15	463	17492	0.058481	0.251071	1.23299	5.03729	0.00431965	DAG1//PIK3CB
GO:0090051	negative_regulation_of_cell_migration_involved_in_sprouting_angiogenesis	Biological Process	2	15	463	17492	0.058481	0.251071	1.23299	5.03729	0.00431965	KLF4//NOTCH1
GO:1902187	negative_regulation_of_viral_release_from_host_cell	Biological Process	2	15	463	17492	0.058481	0.251071	1.23299	5.03729	0.00431965	TRIM21//TRIM25
GO:2001028	positive_regulation_of_endothelial_cell_chemotaxis	Biological Process	2	15	463	17492	0.058481	0.251071	1.23299	5.03729	0.00431965	FGF16//LGMN
GO:0044265	cellular_macromolecule_catabolic_process	Biological Process	32	905	463	17492	0.0588534	0.252424	1.23023	1.33586	0.0691145	ANAPC7//ANKZF1//AP2M1//ATXN3//BAP1//CPVL//CTSO//DDX5//DEDD2//DNA2//EDC4//GSPT1//IFI27//KCTD21//LGMN//OAS2//PABPC4//PRPF18//PSMA3//PSMC3//PSMC5//PSMD13//RNASEH1//RNF20//RNH1//RPL36A//TOR1A//TRIM25//UPF2//USP22//USP5//XRN2
GO:0051168	nuclear_export	Biological Process	8	158	463	17492	0.0593142	0.254154	1.22684	1.9129	0.0172786	CPSF1//DHX38//GLE1//HNRNPA2B1//NUP210//NUP93//THOC1//UPF2
GO:0010557	positive_regulation_of_macromolecule_biosynthetic_process	Biological Process	61	1891	463	17492	0.0594541	0.254263	1.22582	1.2187	0.131749	ARHGEF2//ARID4A//CALCOCO1//CAMK1//CD74//CHUK//CNBP//CRTC3//DHX29//DNA2//EEF2//ELK1//F2RL1//FOS//FOXK1//GLMN//HABP4//HCFC1//HDAC3//HEXB//HMGN3//HNRNPA2B1//HNRNPAB//IL18//IRF4//IRF7//IRF8//JMJD6//KARS//KLF4//MAP2K1//MSTN//NAMPT//NGRN//NOTCH1//OSM//PARP9//PKN1//PPP1R15A//PSMC3//PSMC5//PTK2B//RAF1//RNF20//RXRB//SMARCB1//SMARCD2//STAT3//STAT6//TADA2B//TAF4B//TCERG1//THOC1//TLR4//TNIP2//TP53//TTC5//USP…
GO:0032946	positive_regulation_of_mononuclear_cell_proliferation	Biological Process	7	131	463	17492	0.0595459	0.254263	1.22515	2.01876	0.0151188	BCL6//BST1//CD74//CORO1A//DNAJA3//IL18//TLR4
GO:1902904	negative_regulation_of_supramolecular_fiber_organization	Biological Process	7	131	463	17492	0.0595459	0.254263	1.22515	2.01876	0.0151188	ARHGEF2//CORO1A//GMFG//MID1IP1//PRKCD//RDX//TMSB4Y
GO:0044242	cellular_lipid_catabolic_process	Biological Process	9	186	463	17492	0.0596271	0.254263	1.22456	1.82805	0.0194384	ASAH1//CROT//CYP4F12//ENPP2//GBA2//HEXB//NAGA//PCCB//PSAP
GO:0071456	cellular_response_to_hypoxia	Biological Process	9	186	463	17492	0.0596271	0.254263	1.22456	1.82805	0.0194384	ADAM8//CARD16//HIF1AN//NOTCH1//PSMA3//PSMC3//PSMC5//PSMD13//TP53
GO:0033138	positive_regulation_of_peptidyl-serine_phosphorylation	Biological Process	6	105	463	17492	0.0601938	0.254585	1.22045	2.15884	0.012959	ARAF//CAMK1//MAPKAP1//OSM//PAK1//RAF1
GO:0042035	regulation_of_cytokine_biosynthetic_process	Biological Process	6	105	463	17492	0.0601938	0.254585	1.22045	2.15884	0.012959	CD74//GLMN//IRF4//KLF4//STAT3//TLR4
GO:0008156	negative_regulation_of_DNA_replication	Biological Process	3	34	463	17492	0.0602206	0.254585	1.22025	3.3335	0.00647948	BCL6//TERF2//TP53
GO:0031663	lipopolysaccharide-mediated_signaling_pathway	Biological Process	3	34	463	17492	0.0602206	0.254585	1.22025	3.3335	0.00647948	HCK//IL18//TLR4
GO:0045622	regulation_of_T-helper_cell_differentiation	Biological Process	3	34	463	17492	0.0602206	0.254585	1.22025	3.3335	0.00647948	BCL6//IL18//IRF4
GO:0046496	nicotinamide_nucleotide_metabolic_process	Biological Process	3	34	463	17492	0.0602206	0.254585	1.22025	3.3335	0.00647948	NADK//NAMPT//PARP9
GO:0061028	establishment_of_endothelial_barrier	Biological Process	3	34	463	17492	0.0602206	0.254585	1.22025	3.3335	0.00647948	F2RL1//RAP1A//RDX
GO:0070232	regulation_of_T_cell_apoptotic_process	Biological Process	3	34	463	17492	0.0602206	0.254585	1.22025	3.3335	0.00647948	ADAM8//TP53//TSC22D3
GO:0097352	autophagosome_maturation	Biological Process	3	34	463	17492	0.0602206	0.254585	1.22025	3.3335	0.00647948	MCOLN1//SNAP29//UVRAG
GO:0051353	positive_regulation_of_oxidoreductase_activity	Biological Process	4	56	463	17492	0.0606185	0.256022	1.21739	2.69855	0.00863931	GNAI2//NOD1//PTK2B//TERF2
GO:0030193	regulation_of_blood_coagulation	Biological Process	5	80	463	17492	0.0608989	0.256716	1.21539	2.36123	0.0107991	F2RL1//PLAUR//PRKCD//TEC//TLR4
GO:0046889	positive_regulation_of_lipid_biosynthetic_process	Biological Process	5	80	463	17492	0.0608989	0.256716	1.21539	2.36123	0.0107991	ABCG1//ADM//CD74//MID1IP1//PRKCD
GO:0006259	DNA_metabolic_process	Biological Process	27	745	463	17492	0.0618362	0.260419	1.20876	1.3692	0.0583153	APOBEC3B//ATXN3//AXIN2//BAZ2A//COPS7B//DNA2//DNMT1//FOS//GADD45A//NFRKB//PARP9//RNASEH1//RPAIN//SMARCB1//SUMO1//TERF2//THOC1//TP53//TRIM25//TTC5//UBR5//UNG//UVRAG//WRNIP1//XPC//XRCC4//XRN2
GO:0045785	positive_regulation_of_cell_adhesion	Biological Process	16	396	463	17492	0.0627121	0.263856	1.20265	1.52645	0.0345572	ADAM8//BCL6//CD74//CORO1A//CRK//CSK//DAG1//DNAJA3//FLOT1//IL18//MAP3K8//NEDD9//NID1//PAK1//PTK2B//STX3
GO:0071222	cellular_response_to_lipopolysaccharide	Biological Process	9	188	463	17492	0.0629095	0.264435	1.20128	1.8086	0.0194384	CARD16//CARD17//CASP1//HCK//IL18//IRF8//TLR4//TNFRSF1B//TNIP2
GO:0031145	anaphase-promoting_complex-dependent_catabolic_process	Biological Process	5	81	463	17492	0.0635642	0.266933	1.19679	2.33208	0.0107991	ANAPC7//PSMA3//PSMC3//PSMC5//PSMD13
GO:0051050	positive_regulation_of_transport	Biological Process	34	979	463	17492	0.0642567	0.268488	1.19208	1.31206	0.0734341	ABCB1//ABCG1//ADAM8//AIM2//BAP1//CAMK1//CASP1//CHUK//DOCK2//F2RL1//FCN1//FLOT1//GLMN//GNAI2//HDAC3//HPCA//IFIH1//IL2RB//KARS//LILRA2//LILRA5//NADK//NLGN3//OSM//PAK1//PRKCD//RAP1A//RDX//SEC16A//SUMO1//TLR4//TOR1A//TP53//UBR5
GO:0046777	protein_autophosphorylation	Biological Process	9	189	463	17492	0.0645929	0.268488	1.18981	1.79903	0.0194384	CLK2//CSK//EIF2S1//FER//HCK//MARK3//PAK1//PTK2B//TEC
GO:0002753	cytoplasmic_pattern_recognition_receptor_signaling_pathway	Biological Process	3	35	463	17492	0.064623	0.268488	1.18961	3.23826	0.00647948	IFIH1//IRF7//NOD1
GO:0043403	skeletal_muscle_tissue_regeneration	Biological Process	3	35	463	17492	0.064623	0.268488	1.18961	3.23826	0.00647948	DAG1//IFRD1//MSTN
GO:0043516	regulation_of_DNA_damage_response,_signal_transduction_by_p53_class_mediator	Biological Process	3	35	463	17492	0.064623	0.268488	1.18961	3.23826	0.00647948	CD74//DDX5//TP53
GO:0048008	platelet-derived_growth_factor_receptor_signaling_pathway	Biological Process	3	35	463	17492	0.064623	0.268488	1.18961	3.23826	0.00647948	FER//MYO1E//TXNIP
GO:0070884	regulation_of_calcineurin-NFAT_signaling_cascade	Biological Process	3	35	463	17492	0.064623	0.268488	1.18961	3.23826	0.00647948	CHERP//HOMER3//PTBP1
GO:0071526	semaphorin-plexin_signaling_pathway	Biological Process	3	35	463	17492	0.064623	0.268488	1.18961	3.23826	0.00647948	PLXNB2//SEMA4A//SEMA4D
GO:0002821	positive_regulation_of_adaptive_immune_response	Biological Process	6	107	463	17492	0.0647627	0.268488	1.18867	2.11849	0.012959	HLA-B//HLA-H//IL18//PVR//STAT6//TNFSF13
GO:0006352	DNA-templated_transcription,_initiation	Biological Process	10	218	463	17492	0.0651637	0.268488	1.18599	1.73301	0.0215983	BAZ2A//GTF2E2//NOTCH1//NRBF2//NRBP1//RXRB//SMARCB1//TAF4B//TAF5//TP53
GO:0010632	regulation_of_epithelial_cell_migration	Biological Process	10	218	463	17492	0.0651637	0.268488	1.18599	1.73301	0.0215983	AAMP//ENPP2//FGF16//GRN//IQSEC1//KLF4//LGMN//NOTCH1//PTK2B//SEMA4A
GO:0001666	response_to_hypoxia	Biological Process	14	337	463	17492	0.0653481	0.268488	1.18477	1.56948	0.0302376	ADAM8//ADM//CARD16//HIF1AN//ITPR2//NOTCH1//PAK1//PSMA3//PSMC3//PSMC5//PSMD13//PTK2B//RAF1//TP53
GO:0048660	regulation_of_smooth_muscle_cell_proliferation	Biological Process	7	134	463	17492	0.0655966	0.268488	1.18312	1.97357	0.0151188	DNMT1//GNAI2//IL18//KLF4//NAMPT//PAK1//TP53
GO:0051262	protein_tetramerization	Biological Process	7	134	463	17492	0.0655966	0.268488	1.18312	1.97357	0.0151188	ALDH1A3//CD74//CRTC3//CUTC//MCOLN1//PKD2L1//TP53
GO:0002830	positive_regulation_of_type_2_immune_response	Biological Process	2	16	463	17492	0.0656952	0.268488	1.18247	4.72246	0.00431965	CD74//IL18
GO:0007158	neuron_cell-cell_adhesion	Biological Process	2	16	463	17492	0.0656952	0.268488	1.18247	4.72246	0.00431965	NLGN3//NLGN4Y
GO:0007216	G_protein-coupled_glutamate_receptor_signaling_pathway	Biological Process	2	16	463	17492	0.0656952	0.268488	1.18247	4.72246	0.00431965	GRM8//HOMER3
GO:0010225	response_to_UV-C	Biological Process	2	16	463	17492	0.0656952	0.268488	1.18247	4.72246	0.00431965	CARD16//TP53
GO:0010744	positive_regulation_of_macrophage_derived_foam_cell_differentiation	Biological Process	2	16	463	17492	0.0656952	0.268488	1.18247	4.72246	0.00431965	IL18//MAPK9
GO:0014009	glial_cell_proliferation	Biological Process	2	16	463	17492	0.0656952	0.268488	1.18247	4.72246	0.00431965	EEF2//PTK2B
GO:0030889	negative_regulation_of_B_cell_proliferation	Biological Process	2	16	463	17492	0.0656952	0.268488	1.18247	4.72246	0.00431965	MNDA//PKN1
GO:0032225	regulation_of_synaptic_transmission,_dopaminergic	Biological Process	2	16	463	17492	0.0656952	0.268488	1.18247	4.72246	0.00431965	FLOT1//TOR1A
GO:0032367	intracellular_cholesterol_transport	Biological Process	2	16	463	17492	0.0656952	0.268488	1.18247	4.72246	0.00431965	ABCG1//NPC1
GO:0043555	regulation_of_translation_in_response_to_stress	Biological Process	2	16	463	17492	0.0656952	0.268488	1.18247	4.72246	0.00431965	EIF2S1//PPP1R15A
GO:0050774	negative_regulation_of_dendrite_morphogenesis	Biological Process	2	16	463	17492	0.0656952	0.268488	1.18247	4.72246	0.00431965	GORASP1//NLGN3
GO:0070102	interleukin-6-mediated_signaling_pathway	Biological Process	2	16	463	17492	0.0656952	0.268488	1.18247	4.72246	0.00431965	FER//STAT3
GO:0070886	positive_regulation_of_calcineurin-NFAT_signaling_cascade	Biological Process	2	16	463	17492	0.0656952	0.268488	1.18247	4.72246	0.00431965	CHERP//PTBP1
GO:0086064	cell_communication_by_electrical_coupling_involved_in_cardiac_conduction	Biological Process	2	16	463	17492	0.0656952	0.268488	1.18247	4.72246	0.00431965	ATP1A1//ATP1A3
GO:1903206	negative_regulation_of_hydrogen_peroxide-induced_cell_death	Biological Process	2	16	463	17492	0.0656952	0.268488	1.18247	4.72246	0.00431965	PDE8A//PSAP
GO:0043154	negative_regulation_of_cysteine-type_endopeptidase_activity_involved_in_apoptotic_process	Biological Process	5	82	463	17492	0.0662941	0.270686	1.17852	2.30364	0.0107991	CARD16//KLF4//PLAUR//PRDX3//RAF1
GO:0006457	protein_folding	Biological Process	10	219	463	17492	0.0667567	0.272323	1.17551	1.7251	0.0215983	CD74//DNAJA1//DNAJA3//DNAJB4//GNAI2//HSPE1//PDIA6//TOR1A//TOR1B//TTC1
GO:0010830	regulation_of_myotube_differentiation	Biological Process	4	58	463	17492	0.0672583	0.273864	1.17225	2.6055	0.00863931	CD53//FLOT1//HDAC3//NOTCH1
GO:1904589	regulation_of_protein_import	Biological Process	4	58	463	17492	0.0672583	0.273864	1.17225	2.6055	0.00863931	HDAC3//PKIG//PRKCD//UBR5
GO:0038096	Fc-gamma_receptor_signaling_pathway_involved_in_phagocytosis	Biological Process	7	135	463	17492	0.0676932	0.275381	1.16946	1.95895	0.0151188	ARPC1B//CRK//FCGR3A//HCK//PAK1//PIK3CB//PRKCD
GO:0010656	negative_regulation_of_muscle_cell_apoptotic_process	Biological Process	3	36	463	17492	0.0691691	0.280097	1.16009	3.14831	0.00647948	DNMT1//PTK2B//RGL2
GO:0032365	intracellular_lipid_transport	Biological Process	3	36	463	17492	0.0691691	0.280097	1.16009	3.14831	0.00647948	ABCG1//MID1IP1//NPC1
GO:0032733	positive_regulation_of_interleukin-10_production	Biological Process	3	36	463	17492	0.0691691	0.280097	1.16009	3.14831	0.00647948	IRF4//LILRA5//TLR4
GO:0045445	myoblast_differentiation	Biological Process	3	36	463	17492	0.0691691	0.280097	1.16009	3.14831	0.00647948	DDX5//IFRD1//NOTCH1
GO:2000142	regulation_of_DNA-templated_transcription,_initiation	Biological Process	3	36	463	17492	0.0691691	0.280097	1.16009	3.14831	0.00647948	PSMC3//PSMC5//TP53
GO:0031098	stress-activated_protein_kinase_signaling_cascade	Biological Process	6	109	463	17492	0.0695297	0.280745	1.15783	2.07962	0.012959	CHUK//MAP3K8//MAPK9//NOD1//PKN1//TNIP2
GO:0042552	myelination	Biological Process	6	109	463	17492	0.0695297	0.280745	1.15783	2.07962	0.012959	AFG3L2//DAG1//FIG4//HEXB//LPAR1//PSAP
GO:1901222	regulation_of_NIK|NF-kappaB_signaling	Biological Process	6	109	463	17492	0.0695297	0.280745	1.15783	2.07962	0.012959	CPNE1//EDAR//IL18//NOD1//RASSF2//TLR4
GO:0022407	regulation_of_cell-cell_adhesion	Biological Process	16	402	463	17492	0.0696499	0.280745	1.15708	1.50367	0.0345572	ADAM8//BCL6//CD74//CORO1A//CSK//DNAJA3//FERMT3//FGL2//FLOT1//GLMN//IL18//KLF4//MAP3K8//PAK1//PRKCD//RDX
GO:1901214	regulation_of_neuron_death	Biological Process	13	310	463	17492	0.0697192	0.280745	1.15665	1.58431	0.0280778	ADAM8//BTBD10//CORO1A//EIF2S1//ELK1//FOS//GRN//LGMN//PTK2B//STAT3//TLR4//TNFRSF1B//TP53
GO:0006672	ceramide_metabolic_process	Biological Process	5	84	463	17492	0.0719473	0.280745	1.14299	2.24879	0.0107991	ASAH1//GBA2//HEXB//NAGA//PSAP
GO:0051289	protein_homotetramerization	Biological Process	5	84	463	17492	0.0719473	0.280745	1.14299	2.24879	0.0107991	ALDH1A3//CRTC3//MCOLN1//PKD2L1//TP53
GO:0032526	response_to_retinoic_acid	Biological Process	6	110	463	17492	0.0719874	0.280745	1.14274	2.06071	0.012959	CLK2//IGF2R//KLF4//PTK2B//RXRB//TP53
GO:0002431	Fc_receptor_mediated_stimulatory_signaling_pathway	Biological Process	7	137	463	17492	0.0720058	0.280745	1.14263	1.93035	0.0151188	ARPC1B//CRK//FCGR3A//HCK//PAK1//PIK3CB//PRKCD
GO:0033135	regulation_of_peptidyl-serine_phosphorylation	Biological Process	7	137	463	17492	0.0720058	0.280745	1.14263	1.93035	0.0151188	ARAF//CAMK1//MAPKAP1//OSM//PAK1//RAF1//RASSF2
GO:0051897	positive_regulation_of_protein_kinase_B_signaling	Biological Process	8	165	463	17492	0.0724317	0.280745	1.14007	1.83174	0.0172786	ADAM8//CPNE1//FGF16//IL18//OSM//PIK3CB//PIK3CD//PIK3R5
GO:0006883	cellular_sodium_ion_homeostasis	Biological Process	2	17	463	17492	0.0731874	0.280745	1.13556	4.44467	0.00431965	ATP1A1//ATP1A3
GO:0030033	microvillus_assembly	Biological Process	2	17	463	17492	0.0731874	0.280745	1.13556	4.44467	0.00431965	RAP1A//RDX
GO:0030575	nuclear_body_organization	Biological Process	2	17	463	17492	0.0731874	0.280745	1.13556	4.44467	0.00431965	HABP4//SUMO1
GO:0031065	positive_regulation_of_histone_deacetylation	Biological Process	2	17	463	17492	0.0731874	0.280745	1.13556	4.44467	0.00431965	BCL6//TP53
GO:0031643	positive_regulation_of_myelination	Biological Process	2	17	463	17492	0.0731874	0.280745	1.13556	4.44467	0.00431965	DAG1//TNFRSF1B
GO:0032366	intracellular_sterol_transport	Biological Process	2	17	463	17492	0.0731874	0.280745	1.13556	4.44467	0.00431965	ABCG1//NPC1
GO:0032740	positive_regulation_of_interleukin-17_production	Biological Process	2	17	463	17492	0.0731874	0.280745	1.13556	4.44467	0.00431965	IL18//OSM
GO:0033262	regulation_of_nuclear_cell_cycle_DNA_replication	Biological Process	2	17	463	17492	0.0731874	0.280745	1.13556	4.44467	0.00431965	BCL6//TERF2
GO:0043303	mast_cell_degranulation	Biological Process	2	17	463	17492	0.0731874	0.280745	1.13556	4.44467	0.00431965	PIK3CD//SNAP23
GO:0071360	cellular_response_to_exogenous_dsRNA	Biological Process	2	17	463	17492	0.0731874	0.280745	1.13556	4.44467	0.00431965	FLOT1//IFIH1
GO:0071397	cellular_response_to_cholesterol	Biological Process	2	17	463	17492	0.0731874	0.280745	1.13556	4.44467	0.00431965	DAG1//GRAMD1A
GO:0071850	mitotic_cell_cycle_arrest	Biological Process	2	17	463	17492	0.0731874	0.280745	1.13556	4.44467	0.00431965	GADD45A//TP53
GO:1902683	regulation_of_receptor_localization_to_synapse	Biological Process	2	17	463	17492	0.0731874	0.280745	1.13556	4.44467	0.00431965	DAG1//RAP1A
GO:2000726	negative_regulation_of_cardiac_muscle_cell_differentiation	Biological Process	2	17	463	17492	0.0731874	0.280745	1.13556	4.44467	0.00431965	PAK1//RGS2
GO:2000811	negative_regulation_of_anoikis	Biological Process	2	17	463	17492	0.0731874	0.280745	1.13556	4.44467	0.00431965	NOTCH1//PTRH2
GO:0043393	regulation_of_protein_binding	Biological Process	10	223	463	17492	0.0733763	0.280745	1.13444	1.69416	0.0215983	AKTIP//CAMK1//CARD16//CRK//EIF2S1//FLOT1//MAP2K1//MARK3//PBXIP1//PRKCD
GO:0001914	regulation_of_T_cell_mediated_cytotoxicity	Biological Process	3	37	463	17492	0.0738557	0.280745	1.13162	3.06322	0.00647948	HLA-B//HLA-H//PVR
GO:0008206	bile_acid_metabolic_process	Biological Process	3	37	463	17492	0.0738557	0.280745	1.13162	3.06322	0.00647948	CYP27A1//GBA2//NPC1
GO:0042307	positive_regulation_of_protein_import_into_nucleus	Biological Process	3	37	463	17492	0.0738557	0.280745	1.13162	3.06322	0.00647948	HDAC3//PRKCD//UBR5
GO:0046329	negative_regulation_of_JNK_cascade	Biological Process	3	37	463	17492	0.0738557	0.280745	1.13162	3.06322	0.00647948	DNAJA1//F2RL1//HDAC3
GO:1902042	negative_regulation_of_extrinsic_apoptotic_signaling_pathway_via_death_domain_receptors	Biological Process	3	37	463	17492	0.0738557	0.280745	1.13162	3.06322	0.00647948	ARHGEF2//RAF1//TMBIM1
GO:1902622	regulation_of_neutrophil_migration	Biological Process	3	37	463	17492	0.0738557	0.280745	1.13162	3.06322	0.00647948	ADAM8//BST1//CD74
GO:2000249	regulation_of_actin_cytoskeleton_reorganization	Biological Process	3	37	463	17492	0.0738557	0.280745	1.13162	3.06322	0.00647948	GMFG//HCK//PTK2B
GO:0038094	Fc-gamma_receptor_signaling_pathway	Biological Process	7	138	463	17492	0.074222	0.280745	1.12947	1.91636	0.0151188	ARPC1B//CRK//FCGR3A//HCK//PAK1//PIK3CB//PRKCD
GO:0008366	axon_ensheathment	Biological Process	6	111	463	17492	0.0744944	0.280745	1.12788	2.04215	0.012959	AFG3L2//DAG1//FIG4//HEXB//LPAR1//PSAP
GO:0022037	metencephalon_development	Biological Process	6	111	463	17492	0.0744944	0.280745	1.12788	2.04215	0.012959	CRK//LPAR1//MAP2K1//PAK1//SDF4//TP53
GO:0006469	negative_regulation_of_protein_kinase_activity	Biological Process	10	224	463	17492	0.0750933	0.280745	1.1244	1.68659	0.0215983	CAMK2N2//DNAJA1//GADD45A//GMFG//PKIG//PKN1//PRKCD//QARS//RGS2//STK38
GO:0071219	cellular_response_to_molecule_of_bacterial_origin	Biological Process	9	195	463	17492	0.0752898	0.280745	1.12326	1.74368	0.0194384	CARD16//CARD17//CASP1//HCK//IL18//IRF8//TLR4//TNFRSF1B//TNIP2
GO:0051494	negative_regulation_of_cytoskeleton_organization	Biological Process	7	139	463	17492	0.076478	0.280745	1.11646	1.90257	0.0151188	ARHGEF2//CORO1A//GMFG//MID1IP1//PRKCD//RDX//TMSB4Y
GO:0050863	regulation_of_T_cell_activation	Biological Process	13	315	463	17492	0.0768183	0.280745	1.11454	1.55916	0.0280778	ADAM8//BCL6//CD74//CORO1A//CSK//DNAJA3//FGL2//GLMN//IL18//IRF4//MAP3K8//PAK1//TNFRSF1B
GO:0048661	positive_regulation_of_smooth_muscle_cell_proliferation	Biological Process	5	86	463	17492	0.0778563	0.282094	1.10871	2.19649	0.0107991	DNMT1//GNAI2//IL18//NAMPT//PAK1
GO:0006521	regulation_of_cellular_amino_acid_metabolic_process	Biological Process	4	61	463	17492	0.0778917	0.282094	1.10851	2.47736	0.00863931	PSMA3//PSMC3//PSMC5//PSMD13
GO:0016079	synaptic_vesicle_exocytosis	Biological Process	4	61	463	17492	0.0778917	0.282094	1.10851	2.47736	0.00863931	SNAP23//SNAP29//STX11//STX3
GO:0009611	response_to_wounding	Biological Process	21	568	463	17492	0.078188	0.282936	1.10686	1.39678	0.0453564	ADM//DAG1//DOCK9//F2RL1//FERMT3//IFRD1//ITPR2//LCP1//MSTN//NOTCH1//PABPC4//PAK1//PIK3CB//PIK3R5//PLAUR//PRKCD//RAF1//RANGAP1//TEC//TOR1A//TP53
GO:0007259	receptor_signaling_pathway_via_JAK-STAT	Biological Process	3	38	463	17492	0.0786797	0.283324	1.10414	2.98261	0.00647948	FER//STAT3//STAT6
GO:0014911	positive_regulation_of_smooth_muscle_cell_migration	Biological Process	3	38	463	17492	0.0786797	0.283324	1.10414	2.98261	0.00647948	CRK//LPAR1//PAK1
GO:0045823	positive_regulation_of_heart_contraction	Biological Process	3	38	463	17492	0.0786797	0.283324	1.10414	2.98261	0.00647948	ADM//ATP1A1//RGS2
GO:0051294	establishment_of_spindle_orientation	Biological Process	3	38	463	17492	0.0786797	0.283324	1.10414	2.98261	0.00647948	ACTR1B//ARHGEF2//MAP4
GO:1903053	regulation_of_extracellular_matrix_organization	Biological Process	3	38	463	17492	0.0786797	0.283324	1.10414	2.98261	0.00647948	DAG1//NOTCH1//TNFRSF1B
GO:1905521	regulation_of_macrophage_migration	Biological Process	3	38	463	17492	0.0786797	0.283324	1.10414	2.98261	0.00647948	KARS//MSTN//PTK2B
GO:0043484	regulation_of_RNA_splicing	Biological Process	7	140	463	17492	0.0787738	0.283432	1.10362	1.88898	0.0151188	C9orf78//CLK2//DDX5//HABP4//HNRNPA2B1//JMJD6//PTBP1
GO:0048872	homeostasis_of_number_of_cells	Biological Process	9	197	463	17492	0.0790836	0.284315	1.10191	1.72598	0.0194384	ARID4A//BAP1//BCL6//CORO1A//DNAJA3//JMJD6//NOTCH1//PKN1//RASSF2
GO:0002902	regulation_of_B_cell_apoptotic_process	Biological Process	2	18	463	17492	0.0809378	0.287623	1.09185	4.19774	0.00431965	BCL6//CD74
GO:0010224	response_to_UV-B	Biological Process	2	18	463	17492	0.0809378	0.287623	1.09185	4.19774	0.00431965	TP53//XPC
GO:0010893	positive_regulation_of_steroid_biosynthetic_process	Biological Process	2	18	463	17492	0.0809378	0.287623	1.09185	4.19774	0.00431965	ABCG1//ADM
GO:0015868	purine_ribonucleotide_transport	Biological Process	2	18	463	17492	0.0809378	0.287623	1.09185	4.19774	0.00431965	SLC25A41//SLC35B3
GO:0035728	response_to_hepatocyte_growth_factor	Biological Process	2	18	463	17492	0.0809378	0.287623	1.09185	4.19774	0.00431965	CRK//LGMN
GO:0035994	response_to_muscle_stretch	Biological Process	2	18	463	17492	0.0809378	0.287623	1.09185	4.19774	0.00431965	FOS//RAF1
GO:0043011	myeloid_dendritic_cell_differentiation	Biological Process	2	18	463	17492	0.0809378	0.287623	1.09185	4.19774	0.00431965	IRF4//LTBR
GO:0050711	negative_regulation_of_interleukin-1_secretion	Biological Process	2	18	463	17492	0.0809378	0.287623	1.09185	4.19774	0.00431965	CARD16//CARD17
GO:0060004	reflex	Biological Process	2	18	463	17492	0.0809378	0.287623	1.09185	4.19774	0.00431965	AFG3L2//ALDH1A3
GO:0070230	positive_regulation_of_lymphocyte_apoptotic_process	Biological Process	2	18	463	17492	0.0809378	0.287623	1.09185	4.19774	0.00431965	ADAM8//TP53
GO:0071625	vocalization_behavior	Biological Process	2	18	463	17492	0.0809378	0.287623	1.09185	4.19774	0.00431965	NLGN3//NLGN4Y
GO:1900017	positive_regulation_of_cytokine_production_involved_in_inflammatory_response	Biological Process	2	18	463	17492	0.0809378	0.287623	1.09185	4.19774	0.00431965	KARS//TLR4
GO:1900424	regulation_of_defense_response_to_bacterium	Biological Process	2	18	463	17492	0.0809378	0.287623	1.09185	4.19774	0.00431965	F2RL1//GRN
GO:2000641	regulation_of_early_endosome_to_late_endosome_transport	Biological Process	2	18	463	17492	0.0809378	0.287623	1.09185	4.19774	0.00431965	MAP2K1//RDX
GO:0070555	response_to_interleukin-1	Biological Process	9	198	463	17492	0.0810233	0.287623	1.09139	1.71726	0.0194384	CHUK//GBP1//MAP3K8//NOD1//PSMA3//PSMC3//PSMC5//PSMD13//TNIP2
GO:0010634	positive_regulation_of_epithelial_cell_migration	Biological Process	7	141	463	17492	0.0811094	0.287623	1.09093	1.87559	0.0151188	AAMP//ENPP2//FGF16//GRN//IQSEC1//LGMN//PTK2B
GO:0017038	protein_import	Biological Process	7	141	463	17492	0.0811094	0.287623	1.09093	1.87559	0.0151188	NUP93//PEX5//RPAIN//STAT3//TNPO3//TP53//TXNIP
GO:0048857	neural_nucleus_development	Biological Process	4	62	463	17492	0.0816121	0.289174	1.08825	2.4374	0.00863931	ALDH1A3//CNP//MAPKAP1//SEC16A
GO:1901342	regulation_of_vasculature_development	Biological Process	13	319	463	17492	0.0828213	0.293223	1.08186	1.53961	0.0280778	ADM//DNMT1//ENPP2//FGF16//GRN//HIF1AN//KLF4//NOTCH1//PTK2B//RAP1A//RNH1//SEMA4A//STAT3
GO:0050684	regulation_of_mRNA_processing	Biological Process	7	142	463	17492	0.0834847	0.294932	1.07839	1.86238	0.0151188	C9orf78//DDX5//HNRNPA2B1//IWS1//JMJD6//PTBP1//RNF20
GO:0033574	response_to_testosterone	Biological Process	3	39	463	17492	0.0836374	0.294932	1.0776	2.90613	0.00647948	ELK1//MSTN//NASP
GO:0045429	positive_regulation_of_nitric_oxide_biosynthetic_process	Biological Process	3	39	463	17492	0.0836374	0.294932	1.0776	2.90613	0.00647948	KLF4//PTK2B//TLR4
GO:0097696	receptor_signaling_pathway_via_STAT	Biological Process	3	39	463	17492	0.0836374	0.294932	1.0776	2.90613	0.00647948	FER//STAT3//STAT6
GO:1904591	positive_regulation_of_protein_import	Biological Process	3	39	463	17492	0.0836374	0.294932	1.0776	2.90613	0.00647948	HDAC3//PRKCD//UBR5
GO:0008285	negative_regulation_of_cell_population_proliferation	Biological Process	24	671	463	17492	0.0839668	0.295803	1.07589	1.35129	0.0518359	ADM//AXIN2//BAP1//BCL6//CHERP//CSK//DNAJA3//GLMN//IFIT3//IFT52//KARS//KLF4//MAP2K1//MNDA//MSTN//NOTCH1//OSM//PAK1//PHF14//PKN1//PTK2B//RAF1//STAT3//TP53
GO:0050772	positive_regulation_of_axonogenesis	Biological Process	5	88	463	17492	0.0840183	0.295803	1.07563	2.14657	0.0107991	GDI1//MAP2K1//PAK1//PLXNB2//SEMA4D
GO:0065003	protein-containing_complex_assembly	Biological Process	47	1449	463	17492	0.0847783	0.298242	1.07172	1.22543	0.101512	ALDH1A3//AP2M1//ATPAF1//AXIN2//BAZ2A//BIN2//CAB39//CCDC65//CD74//CHRNA2//CLDN14//COPS7B//CRTC3//CUTC//FERMT3//FLOT1//GBP1//GORASP1//IL2RB//JMJD6//KCTD21//MCOLN1//MDN1//MID1IP1//NAP1L4//NASP//NDUFB5//NUP93//PKD2L1//PRKAB1//PRMT5//PRPF18//PSMD13//PTK2B//RAF1//SEC16A//SEC24C//SMARCB1//SNAP23//SNAP29//SNRPB//TP53//TRIM21//TRMT61B//UQCRB//UVRAG//XPC
GO:0060491	regulation_of_cell_projection_assembly	Biological Process	9	200	463	17492	0.0849888	0.298593	1.07064	1.70009	0.0194384	DYNC2LI1//F2RL1//FER//MAP4//MNS1//MSTN//PRKCD//RDX//TBC1D22B
GO:0071236	cellular_response_to_antibiotic	Biological Process	6	115	463	17492	0.0850132	0.298593	1.07051	1.97111	0.012959	ANKZF1//ITPR2//KLF4//PRKCD//STAT6//TP53
GO:0051209	release_of_sequestered_calcium_ion_into_cytosol	Biological Process	4	63	463	17492	0.0854187	0.299779	1.06845	2.39871	0.00863931	CHERP//ITPR2//MCOLN1//RASA3
GO:0090263	positive_regulation_of_canonical_Wnt_signaling_pathway	Biological Process	7	143	463	17492	0.0858996	0.301228	1.06601	1.84936	0.0151188	AXIN2//LRRK1//PSMA3//PSMC3//PSMC5//PSMD13//UBR5
GO:0044255	cellular_lipid_metabolic_process	Biological Process	32	939	463	17492	0.0860067	0.301364	1.06547	1.28749	0.0691145	ACSM3//ALDH1A3//ALOX5//ASAH1//CD74//CDIPT//CPNE1//CROT//CYP4F12//ENPP2//FIG4//GBA2//HEXB//LPCAT1//LPCAT3//MTMR12//NAGA//PCCB//PGS1//PI4KA//PI4KB//PIGN//PIGS//PIK3CB//PIK3CD//PIK3R5//PISD//PRKAB1//PRKAG1//PSAP//RUFY1//SACM1L
GO:0050870	positive_regulation_of_T_cell_activation	Biological Process	9	201	463	17492	0.0870143	0.304316	1.06041	1.69163	0.0194384	ADAM8//BCL6//CD74//CORO1A//CSK//DNAJA3//IL18//MAP3K8//PAK1
GO:0010950	positive_regulation_of_endopeptidase_activity	Biological Process	8	172	463	17492	0.0871795	0.304316	1.05959	1.7572	0.0172786	AIM2//CASP1//CIDEB//DAP//HSPE1//LGMN//NOD1//STAT3
GO:0018105	peptidyl-serine_phosphorylation	Biological Process	8	172	463	17492	0.0871795	0.304316	1.05959	1.7572	0.0172786	CAB39//CHUK//MAPK9//MARK3//MAST3//PKN1//PRKCD//STK38
GO:0008286	insulin_receptor_signaling_pathway	Biological Process	5	89	463	17492	0.0871931	0.304316	1.05952	2.12245	0.0107991	ATP6V0E1//ATP6V1D//ATP6V1E1//FER//NAMPT
GO:1903725	regulation_of_phospholipid_metabolic_process	Biological Process	5	89	463	17492	0.0871931	0.304316	1.05952	2.12245	0.0107991	KLF4//LPCAT1//PIK3R5//PRKCD//PTK2B
GO:0006914	autophagy	Biological Process	11	261	463	17492	0.0877428	0.3046	1.05679	1.59225	0.0237581	DAP//IRF8//MCOLN1//NPC1//NRBF2//PIK3CB//PRKAB1//PRKAG1//SNAP29//TP53//UVRAG
GO:0010212	response_to_ionizing_radiation	Biological Process	7	144	463	17492	0.088354	0.3046	1.05377	1.83651	0.0151188	CLK2//ELK1//GADD45A//KARS//NAMPT//TP53//XRCC4
GO:1900015	regulation_of_cytokine_production_involved_in_inflammatory_response	Biological Process	3	40	463	17492	0.0887254	0.3046	1.05195	2.83348	0.00647948	BAP1//KARS//TLR4
GO:1901998	toxin_transport	Biological Process	3	40	463	17492	0.0887254	0.3046	1.05195	2.83348	0.00647948	ABCG1//DNAJA1//MTMR12
GO:1904407	positive_regulation_of_nitric_oxide_metabolic_process	Biological Process	3	40	463	17492	0.0887254	0.3046	1.05195	2.83348	0.00647948	KLF4//PTK2B//TLR4
GO:0000002	mitochondrial_genome_maintenance	Biological Process	2	19	463	17492	0.0889277	0.3046	1.05096	3.97681	0.00431965	DNA2//TP53
GO:0002448	mast_cell_mediated_immunity	Biological Process	2	19	463	17492	0.0889277	0.3046	1.05096	3.97681	0.00431965	PIK3CD//SNAP23
GO:0006337	nucleosome_disassembly	Biological Process	2	19	463	17492	0.0889277	0.3046	1.05096	3.97681	0.00431965	SMARCB1//SMARCD2
GO:0010832	negative_regulation_of_myotube_differentiation	Biological Process	2	19	463	17492	0.0889277	0.3046	1.05096	3.97681	0.00431965	HDAC3//NOTCH1
GO:0015865	purine_nucleotide_transport	Biological Process	2	19	463	17492	0.0889277	0.3046	1.05096	3.97681	0.00431965	SLC25A41//SLC35B3
GO:0016973	poly(A)+_mRNA_export_from_nucleus	Biological Process	2	19	463	17492	0.0889277	0.3046	1.05096	3.97681	0.00431965	GLE1//NUP93
GO:0019885	antigen_processing_and_presentation_of_endogenous_peptide_antigen_via_MHC_class_I	Biological Process	2	19	463	17492	0.0889277	0.3046	1.05096	3.97681	0.00431965	HLA-B//HLA-H
GO:0032528	microvillus_organization	Biological Process	2	19	463	17492	0.0889277	0.3046	1.05096	3.97681	0.00431965	RAP1A//RDX
GO:0032682	negative_regulation_of_chemokine_production	Biological Process	2	19	463	17492	0.0889277	0.3046	1.05096	3.97681	0.00431965	F2RL1//KLF4
GO:0045061	thymic_T_cell_selection	Biological Process	2	19	463	17492	0.0889277	0.3046	1.05096	3.97681	0.00431965	CD74//DOCK2
GO:0045655	regulation_of_monocyte_differentiation	Biological Process	2	19	463	17492	0.0889277	0.3046	1.05096	3.97681	0.00431965	CD74//IRF7
GO:0046597	negative_regulation_of_viral_entry_into_host_cell	Biological Process	2	19	463	17492	0.0889277	0.3046	1.05096	3.97681	0.00431965	FCN1//TRIM25
GO:0061081	positive_regulation_of_myeloid_leukocyte_cytokine_production_involved_in_immune_response	Biological Process	2	19	463	17492	0.0889277	0.3046	1.05096	3.97681	0.00431965	CD74//TLR4
GO:0099054	presynapse_assembly	Biological Process	2	19	463	17492	0.0889277	0.3046	1.05096	3.97681	0.00431965	NLGN3//NLGN4Y
GO:0099068	postsynapse_assembly	Biological Process	2	19	463	17492	0.0889277	0.3046	1.05096	3.97681	0.00431965	NLGN3//NLGN4Y
GO:1902170	cellular_response_to_reactive_nitrogen_species	Biological Process	2	19	463	17492	0.0889277	0.3046	1.05096	3.97681	0.00431965	CRK//STAT6
GO:2000104	negative_regulation_of_DNA-dependent_DNA_replication	Biological Process	2	19	463	17492	0.0889277	0.3046	1.05096	3.97681	0.00431965	BCL6//TERF2
GO:2000479	regulation_of_cAMP-dependent_protein_kinase_activity	Biological Process	2	19	463	17492	0.0889277	0.3046	1.05096	3.97681	0.00431965	PKIG//PRKAG1
GO:2001014	regulation_of_skeletal_muscle_cell_differentiation	Biological Process	2	19	463	17492	0.0889277	0.3046	1.05096	3.97681	0.00431965	DDX5//MSTN
GO:1903829	positive_regulation_of_cellular_protein_localization	Biological Process	13	323	463	17492	0.0891142	0.305002	1.05005	1.52055	0.0280778	BAP1//CAMK1//EPB41L2//HDAC3//HPCA//PAK1//PARP9//PRKCD//RDX//SEC16A//STX3//TP53//UBR5
GO:0031532	actin_cytoskeleton_reorganization	Biological Process	4	64	463	17492	0.0893104	0.305437	1.0491	2.36123	0.00863931	FER//NEDD9//PAK1//PARVG
GO:2000117	negative_regulation_of_cysteine-type_endopeptidase_activity	Biological Process	5	90	463	17492	0.0904298	0.30901	1.04369	2.09887	0.0107991	CARD16//KLF4//PLAUR//PRDX3//RAF1
GO:0043200	response_to_amino_acid	Biological Process	6	117	463	17492	0.0905646	0.30901	1.04304	1.93742	0.012959	CHUK//DNMT1//HPCA//RRAGD//SESN3//TP53
GO:0043401	steroid_hormone_mediated_signaling_pathway	Biological Process	6	117	463	17492	0.0905646	0.30901	1.04304	1.93742	0.012959	CALCOCO1//DDX5//DNAJA1//RXRB//UBR5//WBP2
GO:0097193	intrinsic_apoptotic_signaling_pathway	Biological Process	7	145	463	17492	0.0908478	0.309737	1.04169	1.82385	0.0151188	CIDEB//DDX5//MOAP1//PPP1R15A//PRKCD//TNFRSF1B//TP53
GO:1903508	positive_regulation_of_nucleic_acid-templated_transcription	Biological Process	52	1631	463	17492	0.0910702	0.310256	1.04062	1.2045	0.112311	ARHGEF2//ARID4A//CALCOCO1//CAMK1//CD74//CHUK//CNBP//CRTC3//ELK1//F2RL1//FOS//FOXK1//HCFC1//HDAC3//HEXB//HMGN3//HNRNPAB//IL18//IRF4//IRF7//IRF8//JMJD6//KARS//KLF4//MAP2K1//MSTN//NAMPT//NOTCH1//OSM//PARP9//PKN1//PSMC3//PSMC5//RAF1//RNF20//RXRB//SMARCB1//SMARCD2//STAT3//STAT6//TADA2B//TAF4B//TCERG1//THOC1//TLR4//TNIP2//TP53//TTC5//USP22//WBP2//ZNF300//ZSCAN21
GO:1902680	positive_regulation_of_RNA_biosynthetic_process	Biological Process	52	1632	463	17492	0.091796	0.311392	1.03718	1.20376	0.112311	ARHGEF2//ARID4A//CALCOCO1//CAMK1//CD74//CHUK//CNBP//CRTC3//ELK1//F2RL1//FOS//FOXK1//HCFC1//HDAC3//HEXB//HMGN3//HNRNPAB//IL18//IRF4//IRF7//IRF8//JMJD6//KARS//KLF4//MAP2K1//MSTN//NAMPT//NOTCH1//OSM//PARP9//PKN1//PSMC3//PSMC5//RAF1//RNF20//RXRB//SMARCB1//SMARCD2//STAT3//STAT6//TADA2B//TAF4B//TCERG1//THOC1//TLR4//TNIP2//TP53//TTC5//USP22//WBP2//ZNF300//ZSCAN21
GO:0043550	regulation_of_lipid_kinase_activity	Biological Process	4	65	463	17492	0.0932859	0.311392	1.03018	2.3249	0.00863931	KLF4//NRBF2//PIK3R5//PTK2B
GO:0051283	negative_regulation_of_sequestering_of_calcium_ion	Biological Process	4	65	463	17492	0.0932859	0.311392	1.03018	2.3249	0.00863931	CHERP//ITPR2//MCOLN1//RASA3
GO:0099504	synaptic_vesicle_cycle	Biological Process	6	118	463	17492	0.0934125	0.311392	1.02959	1.921	0.012959	NLGN3//NLGN4Y//SNAP23//SNAP29//STX11//STX3
GO:0051251	positive_regulation_of_lymphocyte_activation	Biological Process	14	357	463	17492	0.0936827	0.311392	1.02834	1.48156	0.0302376	ADAM8//BCL6//BST1//CD74//CORO1A//CSK//DNAJA3//IL18//MAP3K8//PAK1//STAT6//TLR4//TNFSF13//TNIP2
GO:0006304	DNA_modification	Biological Process	5	91	463	17492	0.093728	0.311392	1.02813	2.07581	0.0107991	APOBEC3B//BAZ2A//DNMT1//FOS//UNG
GO:0051276	chromosome_organization	Biological Process	35	1049	463	17492	0.0938188	0.311392	1.02771	1.26052	0.075594	ARID4A//AXIN2//BAP1//BAZ1B//BAZ2A//BRMS1//CBX3//CBX4//CHD4//COPS7B//DNA2//DNMT1//HCFC1//HDAC3//HMGN3//HNRNPA2B1//HORMAD1//IRF4//JMJD6//NAP1L4//NASP//PAK1//PKN1//PRKCD//PRMT5//RNF20//SETD1B//SMARCB1//SMARCD2//TADA2B//TAF5//TERF2//TP53//USP22//XPC
GO:0009268	response_to_pH	Biological Process	3	41	463	17492	0.09394	0.311392	1.02715	2.76437	0.00647948	LGMN//MCOLN1//PKD2L1
GO:0030517	negative_regulation_of_axon_extension	Biological Process	3	41	463	17492	0.09394	0.311392	1.02715	2.76437	0.00647948	IFRD1//SEMA4A//SEMA4D
GO:0033146	regulation_of_intracellular_estrogen_receptor_signaling_pathway	Biological Process	3	41	463	17492	0.09394	0.311392	1.02715	2.76437	0.00647948	PAK1//WBP2//ZNF366
GO:0090317	negative_regulation_of_intracellular_protein_transport	Biological Process	3	41	463	17492	0.09394	0.311392	1.02715	2.76437	0.00647948	GDI1//PKIG//RANGAP1
GO:2001235	positive_regulation_of_apoptotic_signaling_pathway	Biological Process	8	175	463	17492	0.0939984	0.311392	1.02688	1.72707	0.0172786	CIDEB//DEDD2//LTBR//MAPK9//MOAP1//PLAUR//PRKCD//TP53
GO:0019725	cellular_homeostasis	Biological Process	30	881	463	17492	0.0948345	0.311392	1.02303	1.28648	0.0647948	ADM//AFG3L2//ATP1A1//ATP1A3//ATP6V0E1//ATP6V1D//ATP6V1E1//CHERP//DEDD2//F2RL1//FOXK1//GRN//HEXB//ITPR2//LPAR1//MCOLN1//MSTN//NCF4//PDIA6//PIK3CB//PRDX3//PTK2B//QSOX2//RAB20//RAF1//RAP1A//RASA3//SLC4A2//TP53//TXNRD1
GO:0016052	carbohydrate_catabolic_process	Biological Process	6	119	463	17492	0.0963082	0.311392	1.01634	1.90486	0.012959	ADPGK//FOXK1//HEXB//MGAM//NAGA//PYGM
GO:2001252	positive_regulation_of_chromosome_organization	Biological Process	8	176	463	17492	0.0963374	0.311392	1.0162	1.71726	0.0172786	BCL6//DNMT1//HNRNPA2B1//RNF20//SMARCB1//TADA2B//TP53//WBP2
GO:0006044	N-acetylglucosamine_metabolic_process	Biological Process	2	20	463	17492	0.0971389	0.311392	1.01261	3.77797	0.00431965	EXTL2//GNPDA1
GO:0010804	negative_regulation_of_tumor_necrosis_factor-mediated_signaling_pathway	Biological Process	2	20	463	17492	0.0971389	0.311392	1.01261	3.77797	0.00431965	CARD16//F2RL1
GO:0016137	glycoside_metabolic_process	Biological Process	2	20	463	17492	0.0971389	0.311392	1.01261	3.77797	0.00431965	GBA2//NAGA
GO:0031061	negative_regulation_of_histone_methylation	Biological Process	2	20	463	17492	0.0971389	0.311392	1.01261	3.77797	0.00431965	DNMT1//SMARCB1
GO:0033194	response_to_hydroperoxide	Biological Process	2	20	463	17492	0.0971389	0.311392	1.01261	3.77797	0.00431965	CHUK//PRKCD
GO:0045076	regulation_of_interleukin-2_biosynthetic_process	Biological Process	2	20	463	17492	0.0971389	0.311392	1.01261	3.77797	0.00431965	GLMN//IRF4
GO:0045723	positive_regulation_of_fatty_acid_biosynthetic_process	Biological Process	2	20	463	17492	0.0971389	0.311392	1.01261	3.77797	0.00431965	CD74//MID1IP1
GO:0045980	negative_regulation_of_nucleotide_metabolic_process	Biological Process	2	20	463	17492	0.0971389	0.311392	1.01261	3.77797	0.00431965	HPCA//STAT3
GO:0060396	growth_hormone_receptor_signaling_pathway	Biological Process	2	20	463	17492	0.0971389	0.311392	1.01261	3.77797	0.00431965	STAT3//STAT6
GO:1901017	negative_regulation_of_potassium_ion_transmembrane_transporter_activity	Biological Process	2	20	463	17492	0.0971389	0.311392	1.01261	3.77797	0.00431965	CAB39//SUMO1
GO:1901741	positive_regulation_of_myoblast_fusion	Biological Process	2	20	463	17492	0.0971389	0.311392	1.01261	3.77797	0.00431965	CD53//FLOT1
GO:0050766	positive_regulation_of_phagocytosis	Biological Process	4	66	463	17492	0.097344	0.311392	1.01169	2.28968	0.00863931	DOCK2//F2RL1//IL2RB//RAP1A
GO:0006886	intracellular_protein_transport	Biological Process	33	986	463	17492	0.0984561	0.311392	1.00676	1.26443	0.0712743	AP2M1//ARHGEF2//CD74//CPSF1//CROT//DHX38//DYNC2LI1//GLE1//HNRNPA2B1//HOMER3//IFT52//NUP210//NUP93//PEX5//RAB20//RPAIN//RPL36A//SEC16A//SEC23B//SEC24C//SNX27//SRP68//STAT3//STX11//STX3//TBC1D22B//TERF2//THOC1//TNPO3//TP53//TXNIP//UPF2//ZDHHC18
GO:0006367	transcription_initiation_from_RNA_polymerase_II_promoter	Biological Process	8	177	463	17492	0.0987093	0.311392	1.00564	1.70756	0.0172786	GTF2E2//NOTCH1//NRBF2//NRBP1//RXRB//TAF4B//TAF5//TP53
GO:0051649	establishment_of_localization_in_cell	Biological Process	15	392	463	17492	0.09914	0.311392	1.00375	1.44565	0.0323974	ACTR1B//ARFGAP2//ARHGEF2//CHERP//GORASP1//ITPR2//MAP4//MCOLN1//RAF1//RASA3//SEC16A//SEC24C//SNAP23//SNAP29//TOR1A
GO:0006284	base-excision_repair	Biological Process	3	42	463	17492	0.0992775	0.311392	1.00315	2.69855	0.00647948	DNA2//TP53//UNG
GO:0031641	regulation_of_myelination	Biological Process	3	42	463	17492	0.0992775	0.311392	1.00315	2.69855	0.00647948	DAG1//FIG4//TNFRSF1B
GO:0045123	cellular_extravasation	Biological Process	3	42	463	17492	0.0992775	0.311392	1.00315	2.69855	0.00647948	CRK//FER//PIK3CD
GO:0090311	regulation_of_protein_deacetylation	Biological Process	3	42	463	17492	0.0992775	0.311392	1.00315	2.69855	0.00647948	BCL6//BRMS1//TP53

## Sheet: down.CC_result
ID	Term	Ontology	Count	Size	numInt	numTotal	p_value	fdr	Enrichment_Score	Fold_Enrichment	GeneRatio	Genes
GO:0005737	cytoplasm	Cellular Component	382	11647	474	18337	1.86664e-16	1.15545e-13	15.7289	1.26882	0.805907	AAMP//ABCG1//ACSM3//ACTR1B//ADAM8//ADM//ADPGK//AFG3L2//AHSA1//AIM2//AKTIP//ALDH18A1//ALDH1A3//ALOX5//ANAPC7//ANKZF1//ANP32C//AP2M1//API5//APOBEC3B//ARAF//ARFGAP2//ARHGAP15//ARHGAP30//ARHGEF2//ARID4A//ARPC1B//ASAH1//ATP1A1//ATP1A3//ATP6V0E1//ATP6V1D//ATP6V1E1//ATPAF1//ATXN3//AXIN2//BAP1//BAZ2A//BCL6//BIN2//BRMS1//BST1//BST2//BTBD10//BTD//C2CD2//C9orf78//CAB39//CALCOCO1//CAMK1//CAMK2N2//CANT1//CAP1…
GO:0043227	membrane-bounded_organelle	Cellular Component	400	12575	474	18337	1.11125e-15	3.43931e-13	14.9542	1.23056	0.843882	ABCB1//ABCG1//ACSM3//ACTR1B//ADAM8//ADPGK//AFG3L2//AHSA1//AIM2//AKTIP//ALDH18A1//ALDH1A3//ALOX5//ANAPC7//ANKZF1//ANP32C//AP2M1//API5//APOBEC3B//ARAF//ARFGAP2//ARHGAP30//ARHGEF2//ARID4A//ARPC1B//ASAH1//ATP1A1//ATP1A3//ATP6V0E1//ATP6V1D//ATP6V1E1//ATPAF1//ATXN3//AXIN2//BAP1//BAZ1B//BAZ2A//BCL6//BIN2//BRMS1//BST1//BST2//BTBD10//BTD//C2CD2//C9orf78//CAB39//CALCOCO1//CAMK1//CAMK2N2//CANT1//CAP1//CBX3/…
GO:0043229	intracellular_organelle	Cellular Component	398	12873	474	18337	1.63385e-12	3.22346e-10	11.7868	1.19606	0.839662	AAMP//ABCG1//ACSM3//ACTR1B//ADAM8//ADPGK//AFG3L2//AHSA1//AIM2//AKTIP//ALDH18A1//ALOX5//ANAPC7//ANKZF1//ANP32C//AP2M1//API5//APOBEC3B//ARAF//ARFGAP2//ARHGAP30//ARHGEF2//ARID4A//ARPC1B//ASAH1//ATP1A1//ATP1A3//ATP6V0E1//ATP6V1D//ATP6V1E1//ATPAF1//ATXN3//AXIN2//BAP1//BAZ1B//BAZ2A//BCL6//BIN2//BRMS1//BST1//BST2//BTBD10//BTD//C2CD2//C9orf78//CAB39//CALCOCO1//CAMK1//CAMK2N2//CANT1//CAP1//CBX3//CBX4//CCD…
GO:0005829	cytosol	Cellular Component	203	5142	474	18337	2.08301e-12	3.22346e-10	11.6813	1.52726	0.42827	AAMP//ACTR1B//AHSA1//AIM2//AKTIP//ALDH1A3//ALOX5//ANAPC7//AP2M1//ARAF//ARFGAP2//ARHGAP15//ARHGAP30//ARHGEF2//ARID4A//ARPC1B//ATP6V1D//ATP6V1E1//ATXN3//AXIN2//BAP1//BAZ2A//BST2//C2CD2//C9orf78//CAB39//CALCOCO1//CAMK1//CAMK2N2//CASP1//CHUK//CIDEB//CNBP//CNP//COPS7B//CORO1A//CPNE1//CPOX//CRK//CROT//CRTC3//CSK//CUTC//DAG1//DAPP1//DCTN5//DDX42//DDX55//DIAPH2//DNAJA1//DNAJA3//DNAJB4//DOCK2//DOCK9//EDC4…
GO:0043231	intracellular_membrane-bounded_organelle	Cellular Component	352	11099	474	18337	1.32563e-10	1.64113e-08	9.87758	1.2269	0.742616	ABCG1//ACSM3//ADAM8//ADPGK//AFG3L2//AHSA1//AIM2//AKTIP//ALDH18A1//ALOX5//ANAPC7//ANKZF1//ANP32C//AP2M1//API5//APOBEC3B//ARAF//ARFGAP2//ARHGAP30//ARHGEF2//ARID4A//ARPC1B//ASAH1//ATP1A1//ATP1A3//ATP6V1D//ATP6V1E1//ATPAF1//ATXN3//AXIN2//BAP1//BAZ1B//BAZ2A//BCL6//BRMS1//BST2//BTBD10//BTD//C2CD2//C9orf78//CALCOCO1//CAMK1//CAMK2N2//CANT1//CAP1//CBX3//CBX4//CD74//CDIPT//CETN3//CHD4//CHERP//CHUK//CLDN14/…
GO:0031410	cytoplasmic_vesicle	Cellular Component	107	2351	474	18337	2.11237e-09	1.75531e-07	8.67523	1.76068	0.225738	ABCG1//ACTR1B//ADAM8//ALOX5//AP2M1//ARFGAP2//ARHGAP30//ARHGEF2//ASAH1//ATP1A1//ATP6V0E1//ATP6V1D//ATP6V1E1//BIN2//BST1//BST2//CAB39//CANT1//CAP1//CD53//CD74//CD97//CLEC12A//CNP//CORO1A//CPNE1//CYLC1//DIAPH2//DOCK2//ECE1//EEF2//F2RL1//FCGR3B//FCN1//FERMT3//FGL2//FIG4//FLNB//FLOT1//GBP1//GMFG//GRN//HCK//HEXB//HLA-B//HLA-H//IFNGR2//IGF2R//IL2RB//IRF7//ITPR2//LGMN//LPAR1//LPCAT1//LYZ//MAP2K1//MAPKAP1…
GO:0005654	nucleoplasm	Cellular Component	157	3948	474	18337	2.23063e-09	1.75531e-07	8.65157	1.53841	0.331224	AIM2//ALOX5//ANAPC7//API5//APOBEC3B//ARID4A//ATXN3//BAP1//BAZ1B//BAZ2A//BCL6//BRMS1//BTBD10//C9orf78//CAMK2N2//CBX3//CBX4//CHD4//CHERP//CHUK//CLK2//CMAS//CNP//COPS7B//CORIN//CPNE1//CPSF1//CRTC3//CUTC//DAG1//DCTN5//DDX42//DDX5//DDX55//DEDD2//DHX38//DNA2//DNAJB4//DNMT1//DNTTIP2//EDC4//ELK1//EPB41L2//EWSR1//EXTL2//FAM32A//FLII//FOS//FOXK1//GADD45A//GNAI2//GTF2E2//HABP4//HCFC1//HCK//HDAC3//HIF1AN//HM…
GO:0097708	intracellular_vesicle	Cellular Component	107	2354	474	18337	2.26857e-09	1.75531e-07	8.64425	1.75844	0.225738	ABCG1//ACTR1B//ADAM8//ALOX5//AP2M1//ARFGAP2//ARHGAP30//ARHGEF2//ASAH1//ATP1A1//ATP6V0E1//ATP6V1D//ATP6V1E1//BIN2//BST1//BST2//CAB39//CANT1//CAP1//CD53//CD74//CD97//CLEC12A//CNP//CORO1A//CPNE1//CYLC1//DIAPH2//DOCK2//ECE1//EEF2//F2RL1//FCGR3B//FCN1//FERMT3//FGL2//FIG4//FLNB//FLOT1//GBP1//GMFG//GRN//HCK//HEXB//HLA-B//HLA-H//IFNGR2//IGF2R//IL2RB//IRF7//ITPR2//LGMN//LPAR1//LPCAT1//LYZ//MAP2K1//MAPKAP1…
GO:0031982	vesicle	Cellular Component	151	3852	474	18337	1.48688e-08	1.02264e-06	7.82772	1.51649	0.318565	ABCB1//ABCG1//ACTR1B//ADAM8//AHSA1//ALDH1A3//ALOX5//AP2M1//ARFGAP2//ARHGAP30//ARHGEF2//ARPC1B//ASAH1//ATP1A1//ATP1A3//ATP6V0E1//ATP6V1D//ATP6V1E1//BIN2//BST1//BST2//BTD//CAB39//CANT1//CAP1//CD53//CD74//CD97//CLEC12A//CNP//CORO1A//CPNE1//CPNE2//CPVL//CRK//CSK//CYLC1//DAG1//DDX5//DIAPH2//DNAJA1//DOCK2//ECE1//EEF2//EIF2S1//EPB41L2//F2RL1//FAM168B//FCGR3A//FCGR3B//FCN1//FERMT3//FGL2//FIG4//FLNB//FLOT…
GO:0030141	secretory_granule	Cellular Component	50	835	474	18337	2.93971e-08	1.81968e-06	7.53169	2.31651	0.105485	ACTR1B//ADAM8//ALOX5//ASAH1//ATP6V1D//BIN2//BST1//BST2//CAB39//CANT1//CAP1//CD53//CD97//CLEC12A//CPNE1//CYLC1//DOCK2//ECE1//EEF2//FCGR3B//FCN1//FERMT3//FGL2//GMFG//GRN//HEXB//HLA-H//IGF2R//ITPR2//LPCAT1//LYZ//MGAM//MNDA//NOTCH1//PGRMC1//PLAUR//PRKCD//PSAP//PSMC3//PSMD13//RAP1A//RNPEP//SERPINI1//SLC2A3//SNAP23//SNAP29//STX3//TMBIM1//TNFRSF1B//TOR1A
GO:0012505	endomembrane_system	Cellular Component	169	4512	474	18337	3.49864e-08	1.96878e-06	7.4561	1.449	0.35654	ABCG1//ACTR1B//ADAM8//ADPGK//AHSA1//ALOX5//AP2M1//ARFGAP2//ARHGEF2//ASAH1//ATP1A1//ATP1A3//ATP6V0E1//ATP6V1D//ATP6V1E1//ATXN3//BCL6//BIN2//BST1//BST2//CAB39//CANT1//CAP1//CBX3//CD53//CD74//CD97//CDIPT//CETN3//CHERP//CLDN14//CLEC12A//CNBP//CORO1A//CPNE1//CTAGE1//CYLC1//CYP4F12//DAG1//DCTN5//DIAPH2//DNAJA1//DOCK2//DOCK9//ECE1//EEF2//EPHX1//EXTL2//F2RL1//FCGR3B//FCN1//FERMT3//FGL2//FIG4//FLOT1//FOS/…
GO:1903561	extracellular_vesicle	Cellular Component	94	2115	474	18337	8.28843e-08	4.27545e-06	7.08153	1.71936	0.198312	ABCB1//ACTR1B//AHSA1//ALDH1A3//AP2M1//ARPC1B//ASAH1//ATP1A1//ATP1A3//ATP6V1D//ATP6V1E1//BST1//BST2//BTD//CAB39//CANT1//CAP1//CD53//CD74//CD97//CNP//CORO1A//CPNE1//CPNE2//CPVL//CRK//CSK//DAG1//DDX5//DNAJA1//DOCK2//ECE1//EEF2//EIF2S1//EPB41L2//FAM168B//FCGR3A//FCGR3B//FERMT3//FGL2//FLNB//FLOT1//GNAI2//GNPDA1//GRN//HEXB//HNRNPA2B1//HSPE1//IGF2R//LCP1//LGMN//LYZ//MARCKSL1//MARK3//MGAM//MINPP1//MNDA//…
GO:0070062	extracellular_exosome	Cellular Component	93	2094	474	18337	1.02334e-07	4.87269e-06	6.98998	1.71813	0.196203	ABCB1//ACTR1B//AHSA1//ALDH1A3//AP2M1//ARPC1B//ASAH1//ATP1A1//ATP6V1D//ATP6V1E1//BST1//BST2//BTD//CAB39//CANT1//CAP1//CD53//CD74//CD97//CNP//CORO1A//CPNE1//CPNE2//CPVL//CRK//CSK//DAG1//DDX5//DNAJA1//DOCK2//ECE1//EEF2//EIF2S1//EPB41L2//FAM168B//FCGR3A//FCGR3B//FERMT3//FGL2//FLNB//FLOT1//GNAI2//GNPDA1//GRN//HEXB//HNRNPA2B1//HSPE1//IGF2R//LCP1//LGMN//LYZ//MARCKSL1//MARK3//MGAM//MINPP1//MNDA//MYO1E//N…
GO:0031981	nuclear_lumen	Cellular Component	172	4719	474	18337	1.76542e-07	7.80566e-06	6.75315	1.41003	0.362869	AIM2//ALOX5//ANAPC7//API5//APOBEC3B//ARID4A//ATXN3//BAP1//BAZ1B//BAZ2A//BCL6//BRMS1//BTBD10//C9orf78//CALCOCO1//CAMK2N2//CBX3//CBX4//CETN3//CHD4//CHERP//CHUK//CLK2//CMAS//CNP//COPS7B//CORIN//CPNE1//CPSF1//CRTC3//CUTC//DAG1//DCTN5//DDX42//DDX5//DDX55//DEDD2//DHX38//DIAPH2//DNA2//DNAJB4//DNMT1//DNTTIP2//EDC4//ELK1//EPB41L2//EWSR1//EXTL2//FAM32A//FER//FLII//FOS//FOXK1//GADD45A//GLE1//GNAI2//GTF2E2//…
GO:0030667	secretory_granule_membrane	Cellular Component	24	298	474	18337	9.55959e-07	3.94492e-05	6.01956	3.11562	0.0506329	ADAM8//ATP6V1D//BST1//BST2//CD53//CD97//CLEC12A//CPNE1//FCGR3B//HLA-H//IGF2R//ITPR2//LPCAT1//MGAM//PGRMC1//PLAUR//PSAP//RAP1A//SLC2A3//SNAP23//SNAP29//STX3//TMBIM1//TNFRSF1B
GO:0099503	secretory_vesicle	Cellular Component	52	1000	474	18337	1.26297e-06	4.88612e-05	5.89861	2.01165	0.109705	ACTR1B//ADAM8//ALOX5//ASAH1//ATP6V1D//BIN2//BST1//BST2//CAB39//CANT1//CAP1//CD53//CD97//CLEC12A//CPNE1//CYLC1//DOCK2//ECE1//EEF2//FCGR3B//FCN1//FERMT3//FGL2//GMFG//GRN//HEXB//HLA-H//IGF2R//ITPR2//LPCAT1//LYZ//MGAM//MNDA//NOTCH1//PGRMC1//PLAUR//PRKCD//PSAP//PSMC3//PSMD13//RAP1A//RNPEP//SERPINI1//SLC2A3//SNAP23//SNAP29//STX11//STX3//TMBIM1//TNFRSF1B//TOR1A//TPRG1L
GO:0005634	nucleus	Cellular Component	244	7488	474	18337	1.38402e-06	5.03945e-05	5.85886	1.26059	0.514768	AIM2//AKTIP//ALOX5//ANAPC7//ANP32C//API5//APOBEC3B//ARID4A//ARPC1B//ASAH1//ATXN3//AXIN2//BAP1//BAZ1B//BAZ2A//BCL6//BRMS1//BTBD10//C2CD2//C9orf78//CALCOCO1//CAMK1//CAMK2N2//CBX3//CBX4//CD74//CETN3//CHD4//CHERP//CHUK//CLK2//CMAS//CNBP//CNP//COPS7B//CORIN//CORO1A//CPNE1//CPNE2//CPSF1//CRK//CRTC3//CUTC//CYLC1//DAG1//DCTN5//DDX42//DDX5//DDX55//DEDD2//DHX38//DIAPH2//DNA2//DNAJA1//DNAJA3//DNAJB4//DNMT1/…
GO:0005925	focal_adhesion	Cellular Component	28	411	474	18337	3.37041e-06	0.000115905	5.47232	2.63552	0.0590717	ARHGEF2//ARPC1B//CAP1//CD97//DAG1//EPB41L2//FLII//FLNB//FLOT1//HCK//IGF2R//LASP1//LCP1//MAP2K1//MPRIP//NEDD9//PACSIN2//PAK1//PARVG//PI4KA//PLAUR//PTK2B//PVR//RDX//SLC4A2//SNAP23//SRP68//SVIL
GO:0035579	specific_granule_membrane	Cellular Component	12	91	474	18337	3.84076e-06	0.000119858	5.41558	5.1014	0.0253165	ADAM8//ATP6V1D//BST1//CD53//CLEC12A//PGRMC1//PLAUR//RAP1A//SLC2A3//SNAP23//TMBIM1//TNFRSF1B
GO:0005924	cell-substrate_adherens_junction	Cellular Component	28	414	474	18337	3.87262e-06	0.000119858	5.412	2.61642	0.0590717	ARHGEF2//ARPC1B//CAP1//CD97//DAG1//EPB41L2//FLII//FLNB//FLOT1//HCK//IGF2R//LASP1//LCP1//MAP2K1//MPRIP//NEDD9//PACSIN2//PAK1//PARVG//PI4KA//PLAUR//PTK2B//PVR//RDX//SLC4A2//SNAP23//SRP68//SVIL
GO:0042581	specific_granule	Cellular Component	16	160	474	18337	4.1222e-06	0.000121507	5.38487	3.86857	0.0337553	ADAM8//ATP6V1D//BST1//CANT1//CD53//CLEC12A//DOCK2//LYZ//PGRMC1//PLAUR//RAP1A//SLC2A3//SNAP23//STX3//TMBIM1//TNFRSF1B
GO:0030055	cell-substrate_junction	Cellular Component	28	418	474	18337	4.64916e-06	0.00013081	5.33263	2.59138	0.0590717	ARHGEF2//ARPC1B//CAP1//CD97//DAG1//EPB41L2//FLII//FLNB//FLOT1//HCK//IGF2R//LASP1//LCP1//MAP2K1//MPRIP//NEDD9//PACSIN2//PAK1//PARVG//PI4KA//PLAUR//PTK2B//PVR//RDX//SLC4A2//SNAP23//SRP68//SVIL
GO:1904813	ficolin-1-rich_granule_lumen	Cellular Component	13	124	474	18337	1.972e-05	0.000530725	4.70509	4.05575	0.0274262	ACTR1B//ALOX5//ASAH1//BIN2//CAB39//CANT1//EEF2//FCN1//FGL2//GMFG//MNDA//PSMC3//PSMD13
GO:0012506	vesicle_membrane	Cellular Component	41	802	474	18337	2.65085e-05	0.000683698	4.57661	1.9777	0.0864979	ADAM8//AP2M1//ARFGAP2//ATP6V0E1//ATP6V1D//BST1//BST2//CD53//CD74//CD97//CLEC12A//CORO1A//CPNE1//FCGR3B//GBP1//HLA-B//HLA-H//IFNGR2//IGF2R//ITPR2//LPCAT1//MCOLN1//MGAM//PACSIN2//PDE6D//PGRMC1//PLAUR//PSAP//RAB20//RAP1A//SEC16A//SEC23B//SEC24C//SLC2A3//SNAP23//SNAP29//STX3//TMBIM1//TNFRSF1B//TOR1A//TPRG1L
GO:0030659	cytoplasmic_vesicle_membrane	Cellular Component	40	781	474	18337	3.19809e-05	0.000791846	4.49511	1.98134	0.0843882	ADAM8//AP2M1//ARFGAP2//ATP6V0E1//ATP6V1D//BST1//BST2//CD53//CD74//CD97//CLEC12A//CORO1A//CPNE1//FCGR3B//HLA-B//HLA-H//IFNGR2//IGF2R//ITPR2//LPCAT1//MCOLN1//MGAM//PACSIN2//PDE6D//PGRMC1//PLAUR//PSAP//RAB20//RAP1A//SEC16A//SEC23B//SEC24C//SLC2A3//SNAP23//SNAP29//STX3//TMBIM1//TNFRSF1B//TOR1A//TPRG1L
GO:0005912	adherens_junction	Cellular Component	31	553	474	18337	4.90903e-05	0.00116873	4.309	2.16864	0.0654008	ARHGEF2//ARPC1B//CAP1//CD97//DAG1//EPB41L2//FLII//FLNB//FLOT1//HCK//IGF2R//LASP1//LCP1//MAP2K1//MPRIP//MYO1E//NEDD9//NOTCH1//PACSIN2//PAK1//PARVG//PI4KA//PKP4//PLAUR//PTK2B//PVR//RDX//SLC4A2//SNAP23//SRP68//SVIL
GO:0042582	azurophil_granule	Cellular Component	14	156	474	18337	5.49504e-05	0.00125979	4.26003	3.47179	0.0295359	BST2//CAP1//CPNE1//GRN//HEXB//HLA-H//LPCAT1//LYZ//MNDA//PRKCD//PSAP//SNAP23//SNAP29//STX3
GO:0031090	organelle_membrane	Cellular Component	125	3520	474	18337	6.77855e-05	0.00149854	4.16886	1.37378	0.263713	ABCG1//ADAM8//ADPGK//AFG3L2//ALDH18A1//ALOX5//ANKZF1//AP2M1//ARFGAP2//ATP6V0E1//ATP6V1D//ATP6V1E1//ATXN3//BST1//BST2//CANT1//CBX3//CD53//CD74//CD97//CDIPT//CHERP//CLEC12A//CNP//CORO1A//CPNE1//CPOX//CTAGE1//CYB5B//CYP27A1//CYP4F12//DCTN5//DNAJA1//ECE1//EPHX1//EXTL2//FCGR3B//FIG4//FLOT1//GALNT2//GBA2//GBP1//GLE1//GORASP1//GRAMD1A//GRN//HLA-B//HLA-H//IFI27//IFNGR2//IGF2R//INTS5//IRF7//ITPR2//LPCAT1/…
GO:0002102	podosome	Cellular Component	6	29	474	18337	8.27981e-05	0.00176731	4.08198	8.00393	0.0126582	ADAM8//ARHGEF2//BIN2//FERMT3//LCP1//SVIL
GO:0005773	vacuole	Cellular Component	39	793	474	18337	9.57997e-05	0.00197667	4.01864	1.90257	0.0822785	ADAM8//AP2M1//ASAH1//ATP6V1D//ATP6V1E1//BST2//CAP1//CD74//CPNE1//CTSO//CYLC1//ECE1//FLOT1//GRN//HCK//HEXB//HLA-H//IGF2R//LGMN//LPCAT1//LYZ//MCOLN1//MNDA//NAGA//NCF4//NPC1//NRBF2//PIK3CD//PRKCD//PSAP//RPN2//RRAGD//SNAP23//SNAP29//STX3//TMBIM1//TRIM21//USP5//UVRAG
GO:0005764	lysosome	Cellular Component	35	694	474	18337	0.000135459	0.00270481	3.86819	1.95101	0.0738397	ADAM8//AP2M1//ASAH1//ATP6V1D//ATP6V1E1//BST2//CAP1//CD74//CPNE1//CTSO//ECE1//FLOT1//GRN//HCK//HEXB//HLA-H//IGF2R//LGMN//LPCAT1//LYZ//MCOLN1//MNDA//NAGA//NCF4//NPC1//PIK3CD//PRKCD//PSAP//RRAGD//SNAP23//SNAP29//STX3//TMBIM1//USP5//UVRAG
GO:0045335	phagocytic_vesicle	Cellular Component	12	134	474	18337	0.000188584	0.00353859	3.7245	3.46439	0.0253165	ADAM8//ATP6V0E1//CORO1A//FLNB//HLA-B//HLA-H//MCOLN1//NCF4//RAB20//RAP1A//SNAP23//UVRAG
GO:0015629	actin_cytoskeleton	Cellular Component	28	515	474	18337	0.000188649	0.00353859	3.72435	2.1033	0.0590717	ACTR1B//ADAM8//ARHGEF2//ARPC1B//BIN2//CAP1//CORIN//CORO1A//CRK//DNAJA3//EPB41L2//FER//FERMT3//FLNB//FLOT1//GBP1//GMFG//HCK//LASP1//LCP1//MPRIP//MYO1E//PAK1//PARVG//POU6F1//RDX//SVIL//TAF5
GO:0005768	endosome	Cellular Component	42	929	474	18337	0.000318765	0.00580341	3.49653	1.74897	0.0886076	ABCG1//AP2M1//ASAH1//ATP1A1//ATP6V0E1//ATP6V1E1//BST2//CD74//CORO1A//DIAPH2//ECE1//F2RL1//FIG4//FLOT1//GRN//HLA-B//HLA-H//IGF2R//IL2RB//IRF7//LGMN//LPAR1//MAP2K1//MCOLN1//NCF4//NPC1//PACSIN2//PI4KB//PKN1//PRDX3//PSAP//RAB20//RAP1A//RRAGD//RUFY1//SDF4//SNX27//ST5//TLR4//TMBIM1//UHRF1BP1L//UVRAG
GO:0001891	phagocytic_cup	Cellular Component	5	27	474	18337	0.000569809	0.00980781	3.24427	7.16401	0.0105485	BIN2//CORO1A//LCP1//MCOLN1//TLR4
GO:1902494	catalytic_complex	Cellular Component	56	1386	474	18337	0.000570406	0.00980781	3.24382	1.56306	0.118143	AFG3L2//ANAPC7//BRMS1//CAB39//CBX4//CCDC65//CHD4//CHUK//DDX5//DHX38//DNA2//DYNC2LI1//GLMN//GNAI2//GTF2E2//HCFC1//HDAC3//HNRNPA2B1//NCF4//NDUFB5//NFRKB//NRBF2//PIGS//PIK3CB//PIK3CD//PIK3R5//PPP1R15A//PPP4C//PPP4R1//PRKAB1//PRKAG1//PRMT5//PSMA3//PSMC3//PSMC5//PSMD13//RNF20//RPN2//SDHC//SEC11B//SETD1B//SMARCB1//SMARCD2//SNRPB//SNRPN//SUMO1//TADA2B//TAF4B//TAF5//TP53//TRIM21//TRMT61B//UQCRB//USP22//U…
GO:0005794	Golgi_apparatus	Cellular Component	62	1583	474	18337	0.000638444	0.010681	3.19488	1.51517	0.130802	ABCG1//ARFGAP2//ARHGEF2//ATP1A1//ATP1A3//BCL6//BST2//CANT1//CD74//CDIPT//DAG1//F2RL1//FIG4//GALNT2//GBA2//GBP1//GDI1//GORASP1//GRN//HABP4//HCK//HDAC3//HLA-B//HLA-H//IFNGR2//IGF2R//LPCAT1//LTBR//MAP2K1//MAPKAP1//MCOLN1//NEDD9//NOTCH1//NPC1//PCSK7//PEX5//PI4KB//PPP1R15A//PRMT5//QSOX2//RAB20//RAF1//RASSF2//RTN1//SACM1L//SDF4//SEC16A//SEC23B//SEC24C//SGCE//SLC35A5//SLC35B3//SLC35D2//SNAP29//STIP1//ST…
GO:0034774	secretory_granule_lumen	Cellular Component	19	320	474	18337	0.000706029	0.0115008	3.15118	2.29696	0.0400844	ACTR1B//ALOX5//BIN2//CAB39//CANT1//CAP1//DOCK2//EEF2//FCN1//FERMT3//GMFG//GRN//HEXB//LYZ//MNDA//PRKCD//PSMC3//PSMD13//SERPINI1
GO:0030139	endocytic_vesicle	Cellular Component	18	298	474	18337	0.000794116	0.012604	3.10012	2.33672	0.0379747	ADAM8//AP2M1//ATP6V0E1//CD74//CORO1A//FLNB//HLA-B//HLA-H//IGF2R//LPAR1//MCOLN1//MYO1E//NCF4//NLGN3//RAB20//RAP1A//SNAP23//UVRAG
GO:0060205	cytoplasmic_vesicle_lumen	Cellular Component	19	324	474	18337	0.000819048	0.0126748	3.08669	2.2686	0.0400844	ACTR1B//ALOX5//BIN2//CAB39//CANT1//CAP1//DOCK2//EEF2//FCN1//FERMT3//GMFG//GRN//HEXB//LYZ//MNDA//PRKCD//PSMC3//PSMD13//SERPINI1
GO:0031965	nuclear_membrane	Cellular Component	18	300	474	18337	0.000857562	0.0129471	3.06673	2.32114	0.0379747	ALOX5//CBX3//CPNE1//DCTN5//GLE1//IFI27//INTS5//MRPS23//NUP210//NUP93//PAK1//QSOX2//RANGAP1//SUMO1//TMEM43//TOR1A//TOR1B//TP53
GO:0031983	vesicle_lumen	Cellular Component	19	326	474	18337	0.000881163	0.0129867	3.05494	2.25469	0.0400844	ACTR1B//ALOX5//BIN2//CAB39//CANT1//CAP1//DOCK2//EEF2//FCN1//FERMT3//GMFG//GRN//HEXB//LYZ//MNDA//PRKCD//PSMC3//PSMD13//SERPINI1
GO:0005615	extracellular_space	Cellular Component	113	3332	474	18337	0.0010147	0.014607	2.99366	1.31197	0.238397	ABCB1//ACTR1B//ADM//AHSA1//ALDH1A3//ALOX5//AP2M1//ARPC1B//ASAH1//ATP1A1//ATP6V1D//ATP6V1E1//BST1//BST2//BTD//CAB39//CANT1//CAP1//CD53//CD74//CD97//CHI3L2//CNP//CORO1A//CPNE1//CPNE2//CPVL//CRK//CSK//CTSO//DAG1//DDX5//DNAJA1//DOCK2//ECE1//EEF2//EIF2S1//ENPP2//EPB41L2//FAM168B//FCGR3A//FCGR3B//FERMT3//FGF16//FGL2//FLNB//FLOT1//GLE1//GNAI2//GNPDA1//GRN//HEXB//HLA-B//HLA-H//HNRNPA2B1//HSPE1//IGF2R//IL…
GO:0019898	extrinsic_component_of_membrane	Cellular Component	17	293	474	18337	0.0016945	0.0238385	2.77096	2.24456	0.035865	BST1//DNAJA3//FCN1//FER//GBA2//GNAI2//GRAMD1A//HCK//HPCA//NRBF2//PACSIN2//PIK3CB//PIK3CD//PIK3R5//PLAUR//PTK2B//TOR1A
GO:0005769	early_endosome	Cellular Component	19	364	474	18337	0.00309606	0.042588	2.50919	2.01931	0.0400844	ASAH1//CORO1A//DIAPH2//F2RL1//FIG4//FLOT1//HLA-B//HLA-H//IGF2R//MAP2K1//PACSIN2//PRDX3//RAB20//RAP1A//RUFY1//SNX27//TLR4//UHRF1BP1L//UVRAG
GO:0030670	phagocytic_vesicle_membrane	Cellular Component	7	76	474	18337	0.00347166	0.0467164	2.45946	3.56315	0.0147679	ATP6V0E1//CORO1A//HLA-B//HLA-H//MCOLN1//RAB20//SNAP23
GO:0005783	endoplasmic_reticulum	Cellular Component	69	1940	474	18337	0.00381175	0.0469092	2.41888	1.37593	0.14557	ABCG1//ADPGK//AHSA1//ASAH1//ATP1A1//ATP1A3//ATXN3//CANT1//CD74//CDIPT//CHERP//CLDN14//CNBP//CTAGE1//CYP4F12//DAG1//DIAPH2//DNAJA1//EPHX1//EXTL2//FIG4//FOS//GALNT2//GBA2//GRAMD1A//GRN//HLA-B//HLA-H//IFI27//IFNGR2//ITPR2//LPCAT1//LPCAT3//MAP2K1//MINPP1//MTMR12//NOMO1//NOTCH1//NPC1//NUP210//OAS1//PDIA6//PGRMC1//PGS1//PI4KB//PIGN//PIGS//PKD2L1//PLAUR//PLD3//PPP1R15A//PRKCD//RPL36A//RPN2//RTN1//SACM1L…
GO:0019034	viral_replication_complex	Cellular Component	2	4	474	18337	0.0038649	0.0469092	2.41286	19.3428	0.00421941	MOV10//PI4KA
GO:0030289	protein_phosphatase_4_complex	Cellular Component	2	4	474	18337	0.0038649	0.0469092	2.41286	19.3428	0.00421941	PPP4C//PPP4R1
GO:0044614	nuclear_pore_cytoplasmic_filaments	Cellular Component	2	4	474	18337	0.0038649	0.0469092	2.41286	19.3428	0.00421941	GLE1//RANGAP1
GO:0098983	symmetric,_GABA-ergic,_inhibitory_synapse	Cellular Component	2	4	474	18337	0.0038649	0.0469092	2.41286	19.3428	0.00421941	NLGN3//NLGN4Y
GO:0035577	azurophil_granule_membrane	Cellular Component	6	59	474	18337	0.00409093	0.0486978	2.38818	3.93413	0.0126582	BST2//CPNE1//HLA-H//LPCAT1//PSAP//SNAP29
GO:0005938	cell_cortex	Cellular Component	17	321	474	18337	0.00432913	0.0505609	2.3636	2.04877	0.035865	ACTR1B//BIN2//CAP1//CORO1A//EPB41L2//FER//FLNB//FLOT1//GMFG//ITPR2//LASP1//NEDD9//NRBP1//PTK2B//RDX//RIC8B//ST5
GO:0005730	nucleolus	Cellular Component	38	950	474	18337	0.00517896	0.0588844	2.28576	1.54743	0.0801688	ATXN3//BAZ2A//BTBD10//CETN3//CUTC//DDX5//DDX55//DEDD2//DIAPH2//DNTTIP2//EWSR1//FAM32A//GLE1//HABP4//IQSEC1//JMJD6//LLPH//MDN1//MNDA//PIK3CB//PIN4//PTBP1//RBM34//RGS2//RNF20//RPAIN//SMARCB1//SRP68//SUMO1//TAF4B//TAF5//TBL3//TP53//TXNRD1//URB2//XPC//XRN2//ZNF300
GO:0012507	ER_to_Golgi_transport_vesicle_membrane	Cellular Component	6	62	474	18337	0.00523206	0.0588844	2.28133	3.74377	0.0126582	CD74//HLA-B//HLA-H//SEC16A//SEC23B//SEC24C
GO:0005635	nuclear_envelope	Cellular Component	22	472	474	18337	0.00589105	0.0642483	2.22981	1.80314	0.0464135	ALOX5//CBX3//CETN3//CPNE1//DCTN5//GLE1//IFI27//IGF2R//INTS5//MNS1//MRPS23//NPC1//NUP210//NUP93//PAK1//QSOX2//RANGAP1//SUMO1//TMEM43//TOR1A//TOR1B//TP53
GO:0005789	endoplasmic_reticulum_membrane	Cellular Component	42	1086	474	18337	0.00601293	0.0642483	2.22091	1.49613	0.0886076	ABCG1//ADPGK//ATXN3//CANT1//CD74//CDIPT//CHERP//CTAGE1//CYP4F12//DNAJA1//EPHX1//EXTL2//GALNT2//GBA2//GRAMD1A//HLA-B//HLA-H//IFI27//IFNGR2//ITPR2//LPCAT1//LPCAT3//NOMO1//NOTCH1//NUP210//PDIA6//PGRMC1//PI4KB//PIGN//PIGS//PLAUR//PLD3//PPP1R15A//RPN2//RTN1//SACM1L//SEC11B//SEC16A//SEC23B//SEC24C//SLC35B3//TOR1A
GO:0005942	phosphatidylinositol_3-kinase_complex	Cellular Component	4	29	474	18337	0.00627282	0.0642483	2.20254	5.33595	0.00843882	NRBF2//PIK3CB//PIK3CD//PIK3R5
GO:0032010	phagolysosome	Cellular Component	2	5	474	18337	0.00633142	0.0642483	2.1985	15.4743	0.00421941	ADAM8//NCF4
GO:0097169	AIM2_inflammasome_complex	Cellular Component	2	5	474	18337	0.00633142	0.0642483	2.1985	15.4743	0.00421941	AIM2//CASP1
GO:0097179	protease_inhibitor_complex	Cellular Component	2	5	474	18337	0.00633142	0.0642483	2.1985	15.4743	0.00421941	CARD16//CASP1
GO:0005774	vacuolar_membrane	Cellular Component	20	421	474	18337	0.00689625	0.0688512	2.16139	1.8378	0.0421941	AP2M1//ATP6V1D//ATP6V1E1//BST2//CD74//CPNE1//ECE1//FLOT1//GRN//HLA-H//IGF2R//LPCAT1//MCOLN1//NPC1//PSAP//RPN2//RRAGD//SNAP29//TMBIM1//UVRAG
GO:0070461	SAGA-type_complex	Cellular Component	4	30	474	18337	0.00709268	0.0696884	2.14919	5.15809	0.00843882	HCFC1//TADA2B//TAF5//USP22
GO:0071437	invadopodium	Cellular Component	3	16	474	18337	0.00747946	0.0723404	2.12613	7.25356	0.00632911	PAK1//PLAUR//SVIL
GO:0042175	nuclear_outer_membrane-endoplasmic_reticulum_membrane_network	Cellular Component	42	1108	474	18337	0.00838126	0.0798154	2.07669	1.46642	0.0886076	ABCG1//ADPGK//ATXN3//CANT1//CD74//CDIPT//CHERP//CTAGE1//CYP4F12//DNAJA1//EPHX1//EXTL2//GALNT2//GBA2//GRAMD1A//HLA-B//HLA-H//IFI27//IFNGR2//ITPR2//LPCAT1//LPCAT3//NOMO1//NOTCH1//NUP210//PDIA6//PGRMC1//PI4KB//PIGN//PIGS//PLAUR//PLD3//PPP1R15A//RPN2//RTN1//SACM1L//SEC11B//SEC16A//SEC23B//SEC24C//SLC35B3//TOR1A
GO:0016607	nuclear_speck	Cellular Component	19	401	474	18337	0.00855062	0.0801944	2.068	1.83299	0.0400844	API5//BAZ2A//CBX4//CLK2//DDX42//GADD45A//GTF2E2//HABP4//NAMPT//PACSIN2//PRPF18//RAF1//RUFY1//SETD1B//SNURF//SUMO1//THOC1//WBP4//ZNF638
GO:0031143	pseudopodium	Cellular Component	3	17	474	18337	0.00891018	0.0823194	2.05011	6.82688	0.00632911	CNP//F2RL1//RAF1
GO:0098985	asymmetric,_glutamatergic,_excitatory_synapse	Cellular Component	2	6	474	18337	0.00933519	0.0849777	2.02988	12.8952	0.00421941	NLGN3//NLGN4Y
GO:0030660	Golgi-associated_vesicle_membrane	Cellular Component	8	114	474	18337	0.00952073	0.0854106	2.02133	2.71478	0.0168776	ARFGAP2//CD74//HLA-B//HLA-H//PI4KA//SEC16A//SEC23B//SEC24C
GO:0030864	cortical_actin_cytoskeleton	Cellular Component	7	92	474	18337	0.0098014	0.0866724	2.00871	2.94347	0.0147679	CAP1//CORO1A//EPB41L2//FLOT1//GMFG//LASP1//RDX
GO:0005682	U5_snRNP	Cellular Component	3	18	474	18337	0.01049	0.0914547	1.97923	6.44761	0.00632911	PRPF18//SNRPB//SNRPN
GO:0005856	cytoskeleton	Cellular Component	75	2239	474	18337	0.0108833	0.0935658	1.96324	1.29586	0.158228	AAMP//ACTR1B//ADAM8//ARHGEF2//ARPC1B//ATP6V1D//AXIN2//BIN2//CAMK2N2//CAP1//CBX3//CCDC146//CCDC65//CETN3//CHD4//CORIN//CORO1A//CRK//CYLC1//DAG1//DCTN5//DNAJA1//DNAJA3//DOCK2//DYNC2LI1//EPB41L2//FER//FERMT3//FLII//FLNB//FLOT1//GBP1//GMFG//GNAI2//HCK//HDAC3//HSDL1//IFT52//LASP1//LCP1//MAP2K1//MAP4//MAP7D1//MARCKSL1//MDN1//MID1IP1//MNS1//MPRIP//MYO1E//NEDD9//NGRN//PACSIN2//PAK1//PARVG//PBXIP1//PDE6D/…
GO:0070821	tertiary_granule_membrane	Cellular Component	6	73	474	18337	0.0114412	0.0961845	1.94153	3.17964	0.0126582	ADAM8//CD53//CLEC12A//MGAM//SLC2A3//SNAP23
GO:0048471	perinuclear_region_of_cytoplasm	Cellular Component	29	715	474	18337	0.0114986	0.0961845	1.93935	1.56907	0.0611814	ANP32C//CHERP//CIDEB//CNP//CYLC1//DNAJA1//ECE1//FAM168B//GALNT2//HIF1AN//IGF2R//LCP1//LGMN//MRFAP1//NPC1//OAS2//PI4KB//PKP4//PRKCD//PTK2B//RANGAP1//RAP1A//SEC16A//SEC23B//TLR4//TNFRSF1B//UBR5//UPF2//WRNIP1
GO:0005739	mitochondrion	Cellular Component	56	1602	474	18337	0.0125225	0.103276	1.90231	1.35231	0.118143	ABCG1//ACSM3//AFG3L2//AIM2//ALDH18A1//ANKZF1//ARAF//ATPAF1//ATXN3//BTD//CNP//CPOX//CYB5B//CYP27A1//DNA2//DNAJA1//DNAJA3//ELK1//HSDL1//HSPE1//IFI27//IFIT3//KARS//LACTB//LRRK1//MAP2K1//MAPK9//MOAP1//MRPS23//NDUFB5//NGRN//OAS1//PARG//PARP9//PCCB//PGS1//PI4KB//PIN4//PISD//PPP1R15A//PRDX3//PTRH2//QARS//RAF1//RGS2//SDHC//SLC25A41//SLC25A43//STAT3//TP53//TRMT61B//TXNIP//TXNRD1//UNG//UQCRB//XPC
GO:0016011	dystroglycan_complex	Cellular Component	2	7	474	18337	0.0128469	0.103276	1.8912	11.053	0.00421941	DAG1//SGCE
GO:0042406	extrinsic_component_of_endoplasmic_reticulum_membrane	Cellular Component	2	7	474	18337	0.0128469	0.103276	1.8912	11.053	0.00421941	GBA2//TOR1A
GO:0005721	pericentric_heterochromatin	Cellular Component	3	20	474	18337	0.014107	0.111123	1.85056	5.80285	0.00632911	BAZ1B//CBX3//DNMT1
GO:0005765	lysosomal_membrane	Cellular Component	17	364	474	18337	0.0141821	0.111123	1.84826	1.80675	0.035865	AP2M1//ATP6V1D//ATP6V1E1//BST2//CD74//CPNE1//ECE1//FLOT1//GRN//HLA-H//IGF2R//LPCAT1//MCOLN1//NPC1//PSAP//SNAP29//TMBIM1
GO:0000792	heterochromatin	Cellular Component	6	78	474	18337	0.0155142	0.118559	1.80927	2.97582	0.0126582	BAZ1B//BAZ2A//CBX3//DNMT1//RNF20//SUMO1
GO:0016234	inclusion_body	Cellular Component	6	78	474	18337	0.0155142	0.118559	1.80927	2.97582	0.0126582	ATXN3//EEF2//PSMC5//RANGAP1//URB2//XRN2
GO:0016235	aggresome	Cellular Component	4	38	474	18337	0.0162566	0.122718	1.78897	4.07217	0.00843882	EEF2//RANGAP1//URB2//XRN2
GO:0098562	cytoplasmic_side_of_membrane	Cellular Component	10	178	474	18337	0.0175914	0.131194	1.7547	2.17335	0.021097	CHUK//DNAJA1//FER//GNAI2//GRAMD1A//HCK//PKP4//PTK2B//RASA3//RGS2
GO:0005686	U2_snRNP	Cellular Component	3	22	474	18337	0.0183462	0.133603	1.73645	5.27532	0.00632911	RBMX2//SNRPB//SNRPN
GO:0005838	proteasome_regulatory_particle	Cellular Component	3	22	474	18337	0.0183462	0.133603	1.73645	5.27532	0.00632911	PSMC3//PSMC5//PSMD13
GO:0009898	cytoplasmic_side_of_plasma_membrane	Cellular Component	9	154	474	18337	0.0188159	0.135431	1.72547	2.26085	0.0189873	CHUK//FER//GNAI2//GRAMD1A//HCK//PKP4//PTK2B//RASA3//RGS2
GO:0034399	nuclear_periphery	Cellular Component	8	130	474	18337	0.0197505	0.140524	1.70442	2.38066	0.0168776	ALOX5//ATXN3//DAG1//HNRNPA2B1//NUP93//PRKCD//THOC1//TP53
GO:0005641	nuclear_envelope_lumen	Cellular Component	2	9	474	18337	0.0212826	0.147377	1.67197	8.59681	0.00421941	ALOX5//IGF2R
GO:0031588	nucleotide-activated_protein_kinase_complex	Cellular Component	2	9	474	18337	0.0212826	0.147377	1.67197	8.59681	0.00421941	PRKAB1//PRKAG1
GO:0005770	late_endosome	Cellular Component	13	266	474	18337	0.0214279	0.147377	1.66902	1.89065	0.0274262	BST2//CD74//FIG4//GRN//IGF2R//LGMN//MAP2K1//MCOLN1//NPC1//PSAP//RAP1A//SDF4//UVRAG
GO:0000139	Golgi_membrane	Cellular Component	29	755	474	18337	0.0222767	0.151531	1.65215	1.48594	0.0611814	ABCG1//ARFGAP2//CANT1//CD74//CDIPT//FIG4//GALNT2//GBA2//GBP1//GORASP1//HLA-B//HLA-H//IFNGR2//IGF2R//LPCAT1//NOTCH1//PCSK7//PI4KB//QSOX2//RTN1//SACM1L//SEC16A//SEC23B//SEC24C//SLC35A5//SLC35B3//SLC35D2//SNAP29//TMBIM4
GO:0016604	nuclear_body	Cellular Component	30	789	474	18337	0.0229378	0.154332	1.63945	1.47094	0.0632911	API5//BAZ1B//BAZ2A//CBX4//CLK2//CORIN//DDX42//GADD45A//GTF2E2//HABP4//HNRNPA2B1//NAMPT//NGRN//PACSIN2//POU6F1//PRPF18//RAF1//RPAIN//RUFY1//SETD1B//SNURF//SUMO1//TERF2//THOC1//TP53//TRIM25//WBP4//YARS//ZNF300//ZNF638
GO:0005681	spliceosomal_complex	Cellular Component	10	188	474	18337	0.0246329	0.159375	1.60848	2.05775	0.021097	API5//C9orf78//DDX5//DHX38//HNRNPA2B1//PRPF18//RBMX2//SNRPB//SNRPN//WBP4
GO:0022624	proteasome_accessory_complex	Cellular Component	3	25	474	18337	0.025887	0.159375	1.58692	4.64228	0.00632911	PSMC3//PSMC5//PSMD13
GO:0030666	endocytic_vesicle_membrane	Cellular Component	9	163	474	18337	0.0260426	0.159375	1.58432	2.13602	0.0189873	AP2M1//ATP6V0E1//CD74//CORO1A//HLA-B//HLA-H//MCOLN1//RAB20//SNAP23
GO:0042612	MHC_class_I_protein_complex	Cellular Component	2	10	474	18337	0.0261537	0.159375	1.58247	7.73713	0.00421941	HLA-B//HLA-H
GO:0030173	integral_component_of_Golgi_membrane	Cellular Component	5	65	474	18337	0.0262621	0.159375	1.58067	2.97582	0.0105485	GALNT2//PCSK7//QSOX2//SLC35A5//SLC35B3
GO:0070820	tertiary_granule	Cellular Component	9	164	474	18337	0.0269517	0.161972	1.56941	2.12299	0.0189873	ADAM8//ASAH1//CANT1//CD53//CLEC12A//LYZ//MGAM//SLC2A3//SNAP23
GO:0035578	azurophil_granule_lumen	Cellular Component	6	90	474	18337	0.0291417	0.172078	1.53549	2.57904	0.0126582	CAP1//GRN//HEXB//LYZ//MNDA//PRKCD
GO:0045177	apical_part_of_cell	Cellular Component	17	396	474	18337	0.0291894	0.172078	1.53478	1.66075	0.035865	ABCB1//ATP1A1//ATP6V1E1//BST2//CYP4F12//DYNC2LI1//EDAR//FLOT1//LGMN//MGAM//NOD1//NOTCH1//PAPPA2//RDX//SLC17A1//SLC4A2//STX3
GO:0030027	lamellipodium	Cellular Component	10	194	474	18337	0.0297241	0.173577	1.52689	1.99411	0.021097	CORO1A//DAG1//FER//FLOT1//NEDD9//NRBP1//PAK1//PTK2B//RDX//STX3
GO:0005687	U4_snRNP	Cellular Component	2	11	474	18337	0.0314265	0.175252	1.5027	7.03376	0.00421941	SNRPB//SNRPN
GO:0017101	aminoacyl-tRNA_synthetase_multienzyme_complex	Cellular Component	2	11	474	18337	0.0314265	0.175252	1.5027	7.03376	0.00421941	KARS//QARS
GO:0017146	NMDA_selective_glutamate_receptor_complex	Cellular Component	2	11	474	18337	0.0314265	0.175252	1.5027	7.03376	0.00421941	GRIN3A//PTK2B
GO:0031932	TORC2_complex	Cellular Component	2	11	474	18337	0.0314265	0.175252	1.5027	7.03376	0.00421941	MAPKAP1//SESN3
GO:0032280	symmetric_synapse	Cellular Component	2	11	474	18337	0.0314265	0.175252	1.5027	7.03376	0.00421941	NLGN3//NLGN4Y
GO:0005643	nuclear_pore	Cellular Component	6	92	474	18337	0.0319927	0.176817	1.49495	2.52298	0.0126582	CETN3//GLE1//NUP210//NUP93//RANGAP1//SUMO1
GO:0030863	cortical_cytoskeleton	Cellular Component	7	117	474	18337	0.0322798	0.176825	1.49107	2.31453	0.0147679	CAP1//CORO1A//EPB41L2//FLOT1//GMFG//LASP1//RDX
GO:0005669	transcription_factor_TFIID_complex	Cellular Component	4	47	474	18337	0.0328105	0.178155	1.48399	3.2924	0.00843882	GTF2E2//TAF4B//TAF5//TP53
GO:0031228	intrinsic_component_of_Golgi_membrane	Cellular Component	5	70	474	18337	0.0347068	0.186813	1.45959	2.76326	0.0105485	GALNT2//PCSK7//QSOX2//SLC35A5//SLC35B3
GO:0005890	sodium:potassium-exchanging_ATPase_complex	Cellular Component	2	12	474	18337	0.0370773	0.191257	1.43089	6.44761	0.00421941	ATP1A1//ATP1A3
GO:0008540	proteasome_regulatory_particle,_base_subcomplex	Cellular Component	2	12	474	18337	0.0370773	0.191257	1.43089	6.44761	0.00421941	PSMC3//PSMC5
GO:0034709	methylosome	Cellular Component	2	12	474	18337	0.0370773	0.191257	1.43089	6.44761	0.00421941	PRMT5//SNRPB
GO:0048188	Set1C|COMPASS_complex	Cellular Component	2	12	474	18337	0.0370773	0.191257	1.43089	6.44761	0.00421941	HCFC1//SETD1B
GO:0089717	spanning_component_of_membrane	Cellular Component	2	12	474	18337	0.0370773	0.191257	1.43089	6.44761	0.00421941	NLGN3//NLGN4Y
GO:0031201	SNARE_complex	Cellular Component	4	49	474	18337	0.0374551	0.191609	1.42649	3.15801	0.00843882	SNAP23//SNAP29//STX11//STX3
GO:0070971	endoplasmic_reticulum_exit_site	Cellular Component	3	29	474	18337	0.0381412	0.191946	1.41861	4.00196	0.00632911	CTAGE1//SEC16A//SEC23B
GO:0071556	integral_component_of_lumenal_side_of_endoplasmic_reticulum_membrane	Cellular Component	3	29	474	18337	0.0381412	0.191946	1.41861	4.00196	0.00632911	CD74//HLA-B//HLA-H
GO:0045121	membrane_raft	Cellular Component	14	319	474	18337	0.0385332	0.192355	1.41417	1.6978	0.0295359	ATP1A1//BST2//CRK//CSK//DAG1//EEF2//FLOT1//GNAI2//HCK//NPC1//PACSIN2//PTK2B//STAT6//TNFRSF1B
GO:0098857	membrane_microdomain	Cellular Component	14	320	474	18337	0.0393881	0.19505	1.40463	1.6925	0.0295359	ATP1A1//BST2//CRK//CSK//DAG1//EEF2//FLOT1//GNAI2//HCK//NPC1//PACSIN2//PTK2B//STAT6//TNFRSF1B
GO:0030134	COPII-coated_ER_to_Golgi_transport_vesicle	Cellular Component	6	98	474	18337	0.0416111	0.204423	1.38079	2.36851	0.0126582	CD74//HLA-B//HLA-H//SEC16A//SEC23B//SEC24C
GO:0001931	uropod	Cellular Component	2	13	474	18337	0.0430829	0.209987	1.36569	5.95164	0.00421941	BST1//FLOT1
GO:0030662	coated_vesicle_membrane	Cellular Component	9	180	474	18337	0.0446654	0.215999	1.35003	1.93428	0.0189873	AP2M1//ARFGAP2//CD74//HLA-B//HLA-H//IGF2R//SEC16A//SEC23B//SEC24C
GO:0030496	midbody	Cellular Component	9	182	474	18337	0.0473221	0.216361	1.32494	1.91303	0.0189873	GDI1//GNAI2//PIK3CB//PKN1//PKP4//RDX//SVIL//URB2//UVRAG
GO:0031300	intrinsic_component_of_organelle_membrane	Cellular Component	16	390	474	18337	0.0474466	0.216361	1.3238	1.5871	0.0337553	AFG3L2//CD74//ECE1//GALNT2//GRAMD1A//HLA-B//HLA-H//NPC1//PCSK7//PIGS//PISD//QSOX2//RTN1//SLC35A5//SLC35B3//TMEM43
GO:0016324	apical_plasma_membrane	Cellular Component	14	330	474	18337	0.0486927	0.216361	1.31254	1.64121	0.0295359	ABCB1//ATP1A1//ATP6V1E1//BST2//CYP4F12//FLOT1//MGAM//NOD1//NOTCH1//PAPPA2//RDX//SLC17A1//SLC4A2//STX3
GO:0005767	secondary_lysosome	Cellular Component	2	14	474	18337	0.0494215	0.216361	1.30608	5.52652	0.00421941	ADAM8//NCF4
GO:0061702	inflammasome_complex	Cellular Component	2	14	474	18337	0.0494215	0.216361	1.30608	5.52652	0.00421941	AIM2//CASP1
GO:0030120	vesicle_coat	Cellular Component	4	54	474	18337	0.0506335	0.216361	1.29556	2.8656	0.00843882	AP2M1//ARFGAP2//SEC23B//SEC24C
GO:0005798	Golgi-associated_vesicle	Cellular Component	9	185	474	18337	0.0515003	0.216862	1.28819	1.882	0.0189873	ARFGAP2//CD74//HLA-B//HLA-H//IGF2R//PI4KA//SEC16A//SEC23B//SEC24C
GO:0046540	U4|U6_x_U5_tri-snRNP_complex	Cellular Component	3	33	474	18337	0.0528402	0.221	1.27704	3.51688	0.00632911	PRPF18//SNRPB//SNRPN
GO:0030127	COPII_vesicle_coat	Cellular Component	2	15	474	18337	0.0560718	0.23139	1.25126	5.15809	0.00421941	SEC23B//SEC24C
GO:0090533	cation-transporting_ATPase_complex	Cellular Component	2	15	474	18337	0.0560718	0.23139	1.25126	5.15809	0.00421941	ATP1A1//ATP1A3
GO:0098576	lumenal_side_of_membrane	Cellular Component	3	35	474	18337	0.0610668	0.249741	1.21419	3.31591	0.00632911	CD74//HLA-B//HLA-H
GO:0016363	nuclear_matrix	Cellular Component	6	108	474	18337	0.0613257	0.249741	1.21236	2.1492	0.0126582	ALOX5//ATXN3//HNRNPA2B1//PRKCD//THOC1//TP53
GO:1990234	transferase_complex	Cellular Component	28	798	474	18337	0.0633131	0.256149	1.19851	1.35739	0.0590717	ANAPC7//CAB39//CBX4//CHUK//DNA2//GLMN//GTF2E2//HCFC1//NRBF2//PIK3CB//PIK3CD//PIK3R5//PRKAB1//PRKAG1//PRMT5//RNF20//RPN2//SETD1B//SNRPB//TADA2B//TAF4B//TAF5//TP53//TRIM21//TRMT61B//USP22//UVRAG//ZNF513
GO:0008180	COP9_signalosome	Cellular Component	3	36	474	18337	0.0653905	0.262836	1.18449	3.2238	0.00632911	COPS7B//EPB41L2//FLOT1
GO:0001772	immunological_synapse	Cellular Component	3	37	474	18337	0.0698508	0.26882	1.15583	3.13667	0.00632911	CD53//CORO1A//SNX27
GO:0060077	inhibitory_synapse	Cellular Component	2	17	474	18337	0.0702273	0.26882	1.15349	4.55125	0.00421941	NLGN3//NLGN4Y
GO:0071013	catalytic_step_2_spliceosome	Cellular Component	5	86	474	18337	0.0719805	0.26882	1.14278	2.24917	0.0105485	DDX5//DHX38//HNRNPA2B1//SNRPB//SNRPN
GO:0000421	autophagosome_membrane	Cellular Component	3	38	474	18337	0.0744446	0.26882	1.12817	3.05413	0.00632911	RPN2//SNAP29//UVRAG
GO:0097525	spliceosomal_snRNP_complex	Cellular Component	4	62	474	18337	0.0763089	0.269916	1.11742	2.49585	0.00843882	PRPF18//RBMX2//SNRPB//SNRPN
GO:0035770	ribonucleoprotein_granule	Cellular Component	10	231	474	18337	0.0779715	0.274229	1.10806	1.6747	0.021097	APOBEC3B//EDC4//EIF2S1//HABP4//MOV10//PABPC4//PSMC3//SUMO1//TRIM21//UPF2
GO:0098978	glutamatergic_synapse	Cellular Component	14	356	474	18337	0.0797489	0.278896	1.09828	1.52135	0.0295359	ARHGEF2//CAMK1//CORO1A//DAG1//FLOT1//GRIN3A//HPCA//NLGN3//NLGN4Y//PACSIN2//PTK2B//RAP1A//STAT3//STX3
GO:0000932	P-body	Cellular Component	5	89	474	18337	0.0807219	0.280713	1.09301	2.17335	0.0105485	APOBEC3B//EDC4//MOV10//PSMC3//TRIM21
GO:0090575	RNA_polymerase_II_transcription_factor_complex	Cellular Component	8	174	474	18337	0.082727	0.284154	1.08235	1.77865	0.0168776	FOS//GTF2E2//HNRNPAB//RXRB//STAT3//TAF4B//TAF5//TP53
GO:0005913	cell-cell_adherens_junction	Cellular Component	6	117	474	18337	0.0830886	0.284154	1.08046	1.98388	0.0126582	DAG1//FLOT1//PKP4//PVR//RDX//SNAP23
GO:0034708	methyltransferase_complex	Cellular Component	6	117	474	18337	0.0830886	0.284154	1.08046	1.98388	0.0126582	HCFC1//PRMT5//SETD1B//SNRPB//TRMT61B//ZNF513
GO:0031301	integral_component_of_organelle_membrane	Cellular Component	14	359	474	18337	0.084003	0.284198	1.07571	1.50863	0.0295359	AFG3L2//CD74//GALNT2//HLA-B//HLA-H//NPC1//PCSK7//PIGS//PISD//QSOX2//RTN1//SLC35A5//SLC35B3//TMEM43
GO:0071944	cell_periphery	Cellular Component	166	5868	474	18337	0.0847901	0.284198	1.07166	1.09438	0.350211	AAMP//ABCB1//ABCG1//ACTR1B//ADAM8//AKTIP//AP2M1//ARFGAP2//ARHGEF2//ARID4A//ATP1A1//ATP1A3//ATP6V1D//ATP6V1E1//ATXN3//BIN2//BST1//BST2//CANT1//CAP1//CASP1//CD300C//CD53//CD74//CD97//CDIPT//CHRNA2//CHUK//CLDN14//CLEC12A//CNP//CORIN//CORO1A//CPNE1//CPNE2//CRK//CSF2RA//CSK//CYP4F12//DAG1//DAPP1//DNAJA3//DNAJB4//ECE1//EDAR//EEF2//ENPP2//EPB41L2//EWSR1//F2RL1//FAM168B//FCGR3A//FCGR3B//FCN1//FER//FLNB//…
GO:0016010	dystrophin-associated_glycoprotein_complex	Cellular Component	2	19	474	18337	0.0853972	0.284198	1.06856	4.07217	0.00421941	DAG1//SGCE
GO:0043034	costamere	Cellular Component	2	19	474	18337	0.0853972	0.284198	1.06856	4.07217	0.00421941	DAG1//SVIL
GO:0071004	U2-type_prespliceosome	Cellular Component	2	19	474	18337	0.0853972	0.284198	1.06856	4.07217	0.00421941	SNRPB//SNRPN
GO:0010494	cytoplasmic_stress_granule	Cellular Component	4	65	474	18337	0.0873387	0.289105	1.05879	2.38066	0.00843882	EIF2S1//HABP4//MOV10//PABPC4
GO:0030117	membrane_coat	Cellular Component	5	92	474	18337	0.0900024	0.294201	1.04575	2.10248	0.0105485	AP2M1//ARFGAP2//IGF2R//SEC23B//SEC24C
GO:0031234	extrinsic_component_of_cytoplasmic_side_of_plasma_membrane	Cellular Component	5	92	474	18337	0.0900024	0.294201	1.04575	2.10248	0.0105485	FER//GNAI2//GRAMD1A//HCK//PTK2B
GO:0000502	proteasome_complex	Cellular Component	4	66	474	18337	0.0911778	0.294201	1.04011	2.34459	0.00843882	PSMA3//PSMC3//PSMC5//PSMD13
GO:0005911	cell-cell_junction	Cellular Component	17	462	474	18337	0.092621	0.294201	1.03329	1.4235	0.035865	ARHGEF2//ATP1A1//CD53//CLDN14//CORO1A//CSK//DAG1//FLOT1//MYO1E//PACSIN2//PAK1//PKP4//PRKCD//PVR//RDX//SNAP23//STX3
GO:0036019	endolysosome	Cellular Component	2	20	474	18337	0.0933183	0.294201	1.03003	3.86857	0.00421941	AP2M1//LGMN
GO:0005741	mitochondrial_outer_membrane	Cellular Component	8	180	474	18337	0.0959229	0.294201	1.01808	1.71936	0.0168776	ANKZF1//CNP//CYB5B//IFI27//MOAP1//PI4KB//PPP1R15A//RAF1
GO:0005684	U2-type_spliceosomal_complex	Cellular Component	5	94	474	18337	0.096483	0.294201	1.01555	2.05775	0.0105485	PRPF18//RBMX2//SNRPB//SNRPN//WBP4
GO:0005886	plasma_membrane	Cellular Component	162	5746	474	18337	0.097253	0.294201	1.0121	1.09068	0.341772	AAMP//ABCB1//ABCG1//ADAM8//AKTIP//AP2M1//ARFGAP2//ARHGEF2//ARID4A//ATP1A1//ATP1A3//ATP6V1D//ATP6V1E1//ATXN3//BIN2//BST1//BST2//CANT1//CAP1//CASP1//CD300C//CD53//CD74//CD97//CDIPT//CHRNA2//CHUK//CLDN14//CLEC12A//CNP//CORIN//CORO1A//CPNE1//CPNE2//CRK//CSF2RA//CSK//CYP4F12//DAG1//DAPP1//DNAJA3//DNAJB4//ECE1//EDAR//EEF2//ENPP2//EPB41L2//EWSR1//F2RL1//FAM168B//FCGR3A//FCGR3B//FCN1//FER//FLNB//FLOT1//F…
GO:0030532	small_nuclear_ribonucleoprotein_complex	Cellular Component	4	68	474	18337	0.0990928	0.294201	1.00396	2.27563	0.00843882	PRPF18//RBMX2//SNRPB//SNRPN
GO:0043202	lysosomal_lumen	Cellular Component	5	95	474	18337	0.0998098	0.294201	1.00083	2.03609	0.0105485	ASAH1//CD74//HEXB//LGMN//PSAP

## Sheet: down.MF_result
ID	Term	Ontology	Count	Size	numInt	numTotal	p_value	fdr	Enrichment_Score	Fold_Enrichment	GeneRatio	Genes
GO:0042802	identical_protein_binding	Molecular Function	80	1762	442	15624	1.14097e-05	0.00569369	4.94272	1.60492	0.180995	ABCG1//AIM2//ALDH18A1//ALDH1A3//BCL6//BST2//CANT1//CARD16//CARD17//CASP1//CBX3//CD74//CHUK//CIDEB//CLDN14//CLK2//CORO1A//CPNE1//CPOX//CSK//ECE1//EWSR1//FLNB//GADD45A//GBP1//GLE1//GNPDA1//GRIN3A//HCFC1//HEXB//HIF1AN//HOMER3//HPCA//IFI27//IFIH1//IFIT3//IGF2R//JMJD6//KARS//KCTD21//LACTB//LCP1//LRRK1//LTBR//LYZ//MID1IP1//MNS1//MSTN//NAGA//NAMPT//NOD1//NRBP1//PACSIN2//PKD2L1//PRDX3//PRMT5//PSAP//PSMC3…
GO:0005524	ATP_binding	Molecular Function	70	1481	442	15624	1.20247e-05	0.00569369	4.91993	1.67076	0.158371	ABCB1//ABCG1//ACSM3//ACTR1B//AFG3L2//ALDH18A1//ARAF//ATP1A1//ATP1A3//BAZ1B//CAMK1//CBWD2//CHD4//CHUK//CLK2//CSK//DDX42//DDX5//DDX55//DHX29//DHX38//DNA2//DNAJA1//DNAJA3//FER//HCK//HSPE1//IFIH1//KARS//LRRK1//MAP2K1//MAP3K8//MAPK9//MARK3//MAST3//MDN1//MOV10//MYO1E//NADK//NOD1//NRBP1//OAS1//OAS2//OAS3//PAK1//PANK4//PCCB//PGS1//PI4KA//PI4KB//PIK3CB//PIK3CD//PKN1//PRKAG1//PRKCD//PSMC3//PSMC5//PTK2B//QA…
GO:0030554	adenyl_nucleotide_binding	Molecular Function	70	1551	442	15624	5.38356e-05	0.0124594	4.26893	1.59535	0.158371	ABCB1//ABCG1//ACSM3//ACTR1B//AFG3L2//ALDH18A1//ARAF//ATP1A1//ATP1A3//BAZ1B//CAMK1//CBWD2//CHD4//CHUK//CLK2//CSK//DDX42//DDX5//DDX55//DHX29//DHX38//DNA2//DNAJA1//DNAJA3//FER//HCK//HSPE1//IFIH1//KARS//LRRK1//MAP2K1//MAP3K8//MAPK9//MARK3//MAST3//MDN1//MOV10//MYO1E//NADK//NOD1//NRBP1//OAS1//OAS2//OAS3//PAK1//PANK4//PCCB//PGS1//PI4KA//PI4KB//PIK3CB//PIK3CD//PKN1//PRKAG1//PRKCD//PSMC3//PSMC5//PTK2B//QA…
GO:0061629	RNA_polymerase_II-specific_DNA-binding_transcription_factor_binding	Molecular Function	21	283	442	15624	5.79655e-05	0.0124594	4.23683	2.62303	0.0475113	BAZ2A//BRMS1//CHD4//CPNE1//DDX5//DNAJA1//FOS//HDAC3//HIF1AN//HMGN3//IFI27//KLF4//PKN1//SMARCB1//STAT3//SUMO1//TAF4B//TCERG1//TP53//WBP2//ZNF366
GO:0035639	purine_ribonucleoside_triphosphate_binding	Molecular Function	79	1828	442	15624	7.3106e-05	0.0124594	4.13605	1.52764	0.178733	ABCB1//ABCG1//ACSM3//ACTR1B//AFG3L2//ALDH18A1//ARAF//ATP1A1//ATP1A3//BAZ1B//CAMK1//CBWD2//CHD4//CHUK//CLK2//CSK//DDX42//DDX5//DDX55//DHX29//DHX38//DNA2//DNAJA1//DNAJA3//EEF2//FER//GBP1//GNAI2//GSPT1//GUCY1B2//HCK//HSPE1//IFIH1//KARS//LRRK1//MAP2K1//MAP3K8//MAPK9//MARK3//MAST3//MDN1//MOV10//MYO1E//NADK//NOD1//NRBP1//OAS1//OAS2//OAS3//PAK1//PANK4//PCCB//PGS1//PI4KA//PI4KB//PIK3CB//PIK3CD//PKN1//PRK…
GO:0001730	2'-5'-oligoadenylate_synthetase_activity	Molecular Function	3	4	442	15624	8.80701e-05	0.0124594	4.05517	26.5113	0.00678733	OAS1//OAS2//OAS3
GO:0003723	RNA_binding	Molecular Function	73	1665	442	15624	9.20967e-05	0.0124594	4.03576	1.54981	0.165158	ALDH18A1//API5//APOBEC3B//BAZ2A//BST2//CBX4//CHERP//CNBP//CNP//CORO1A//CPSF1//DDX42//DDX5//DDX55//DHX29//DHX38//DNA2//DNMT1//DNTTIP2//EEF2//EIF2S1//EWSR1//FAM32A//FLNB//GRN//GSPT1//GTF2E2//HABP4//HNRNPA2B1//HNRNPAB//HNRNPCL1//HSPE1//IFIH1//JMJD6//KARS//LLPH//MAP4//MOV10//MRPS23//NAP1L4//NGRN//OAS1//OAS2//OAS3//PABPC4//PCDHGA9//PIN4//PTBP1//RANGAP1//RBM34//RBMX2//RDX//RNASEH1//RNF20//RPL36A//SETD1…
GO:0032555	purine_ribonucleotide_binding	Molecular Function	79	1894	442	15624	0.000232331	0.0272826	3.63389	1.47441	0.178733	ABCB1//ABCG1//ACSM3//ACTR1B//AFG3L2//ALDH18A1//ARAF//ATP1A1//ATP1A3//BAZ1B//CAMK1//CBWD2//CHD4//CHUK//CLK2//CSK//DDX42//DDX5//DDX55//DHX29//DHX38//DNA2//DNAJA1//DNAJA3//EEF2//FER//GBP1//GNAI2//GSPT1//GUCY1B2//HCK//HSPE1//IFIH1//KARS//LRRK1//MAP2K1//MAP3K8//MAPK9//MARK3//MAST3//MDN1//MOV10//MYO1E//NADK//NOD1//NRBP1//OAS1//OAS2//OAS3//PAK1//PANK4//PCCB//PGS1//PI4KA//PI4KB//PIK3CB//PIK3CD//PKN1//PRK…
GO:0004715	non-membrane_spanning_protein_tyrosine_kinase_activity	Molecular Function	7	46	442	15624	0.000284976	0.0272826	3.54519	5.37911	0.0158371	BAZ1B//CSK//FER//HCK//PRKCD//PTK2B//TEC
GO:0017076	purine_nucleotide_binding	Molecular Function	79	1907	442	15624	0.000288095	0.0272826	3.54046	1.46435	0.178733	ABCB1//ABCG1//ACSM3//ACTR1B//AFG3L2//ALDH18A1//ARAF//ATP1A1//ATP1A3//BAZ1B//CAMK1//CBWD2//CHD4//CHUK//CLK2//CSK//DDX42//DDX5//DDX55//DHX29//DHX38//DNA2//DNAJA1//DNAJA3//EEF2//FER//GBP1//GNAI2//GSPT1//GUCY1B2//HCK//HSPE1//IFIH1//KARS//LRRK1//MAP2K1//MAP3K8//MAPK9//MARK3//MAST3//MDN1//MOV10//MYO1E//NADK//NOD1//NRBP1//OAS1//OAS2//OAS3//PAK1//PANK4//PCCB//PGS1//PI4KA//PI4KB//PIK3CB//PIK3CD//PKN1//PRK…
GO:0030234	enzyme_regulator_activity	Molecular Function	49	1051	442	15624	0.000381969	0.0328841	3.41797	1.64802	0.11086	AHSA1//ARFGAP2//ARHGAP15//ARHGAP30//BST2//CAB39//CAMK2N2//CARD16//CARD17//CASP1//CYB5B//DNAJA1//DNAJA3//DNAJB4//DOCK2//GDI1//GLMN//GMFG//KLF4//MAP2K1//MTMR12//NCF4//NOD1//NOTCH1//PARP9//PDE6D//PIK3R5//PKIG//PPP1R15A//PPP4C//PPP4R1//PRDX3//PRKAG1//PRKCD//PSAP//QARS//RAF1//RANGAP1//RASA3//RGS2//RIC8B//RIN2//RNH1//SEC23B//SERPINI1//TBC1D22B//TP53//TXNIP//WRNIP1
GO:0000166	nucleotide_binding	Molecular Function	86	2146	442	15624	0.000441154	0.0348144	3.35541	1.41657	0.19457	ABCB1//ABCG1//ACSM3//ACTR1B//AFG3L2//ALDH18A1//ALDH1A3//ARAF//ATP1A1//ATP1A3//BAZ1B//CAMK1//CBWD2//CHD4//CHUK//CLK2//CNP//CSK//DDX42//DDX5//DDX55//DHX29//DHX38//DNA2//DNAJA1//DNAJA3//DNMT1//EEF2//FER//GBP1//GNAI2//GSPT1//GUCY1B2//HCK//HSPE1//IFIH1//KARS//LRRK1//MAP2K1//MAP3K8//MAPK9//MARK3//MAST3//MDN1//MOV10//MYO1E//NADK//NOD1//NRBP1//OAS1//OAS2//OAS3//PAK1//PANK4//PARP9//PCCB//PGS1//PI4KA//PI4K…
GO:0001965	G-protein_alpha-subunit_binding	Molecular Function	5	24	442	15624	0.000482477	0.0351466	3.31652	7.36425	0.0113122	F2RL1//IGF2R//LPAR1//RGS2//RIC8B
GO:0019899	enzyme_binding	Molecular Function	86	2216	442	15624	0.00120148	0.0812715	2.92028	1.37182	0.19457	ABCB1//ANAPC7//ARHGEF2//ATP1A1//ATP6V1E1//ATXN3//AXIN2//BRMS1//CAB39//CAMK2N2//CAP1//CARD16//CARD17//CASP1//CBX3//CBX4//CD74//CHD4//CPSF1//CRK//CSK//DDX5//DIAPH2//DNAJA1//DOCK2//DOCK9//EEF2//FER//FLOT1//GADD45A//GBP1//GDI1//GLMN//GRIN3A//HDAC3//HPCA//IGF2R//IQSEC1//KCTD21//KLF4//LCP1//LTBR//MAPKAP1//MOAP1//NEDD9//NFRKB//NOTCH1//PAK1//PARP9//PDE6D//PDE8A//PEX5//PHRF1//PKN1//PLAUR//PPP1R15A//PRDX3/…
GO:0016773	phosphotransferase_activity,_alcohol_group_as_acceptor	Molecular Function	35	720	442	15624	0.00131031	0.0827241	2.88263	1.71833	0.0791855	ADPGK//ARAF//BAZ1B//CAB39//CAMK1//CHUK//CLK2//CSK//FER//HCK//IGF2R//LRRK1//MAP2K1//MAP3K8//MAPK9//MARK3//MAST3//NADK//NRBP1//PAK1//PANK4//PI4KA//PI4KB//PIK3CB//PIK3CD//PKN1//PRKAB1//PRKAG1//PRKCD//PTK2B//RAF1//RASSF2//STK38//STK40//TEC
GO:0051059	NF-kappaB_binding	Molecular Function	5	30	442	15624	0.001407	0.0832766	2.85171	5.8914	0.0113122	BRMS1//CPNE1//HDAC3//HIF1AN//TAF4B
GO:0001046	core_promoter_sequence-specific_DNA_binding	Molecular Function	6	45	442	15624	0.00158458	0.0882703	2.80009	4.71312	0.0135747	BAZ2A//FOS//GADD45A//SMARCB1//TP53//ZNF513
GO:0008047	enzyme_activator_activity	Molecular Function	27	526	442	15624	0.00216536	0.113922	2.66447	1.81446	0.061086	AHSA1//ARFGAP2//ARHGAP15//ARHGAP30//CAB39//CASP1//CYB5B//DNAJA1//DNAJB4//DOCK2//GDI1//GMFG//MAP2K1//NCF4//NOD1//PPP1R15A//PRKCD//PSAP//RAF1//RANGAP1//RASA3//RGS2//RIC8B//RIN2//SEC23B//TBC1D22B//WRNIP1
GO:0051087	chaperone_binding	Molecular Function	9	102	442	15624	0.00240119	0.115312	2.61957	3.11898	0.020362	AHSA1//ATP1A1//ATP1A3//DNAJA1//DNAJB4//GRN//HSPE1//STIP1//TP53
GO:0016798	hydrolase_activity,_acting_on_glycosyl_bonds	Molecular Function	10	122	442	15624	0.00243531	0.115312	2.61345	2.89741	0.0226244	BST1//CHI3L2//GBA2//HEXB//LYZ//MGAM//NAGA//PARG//PSAP//UNG
GO:0008022	protein_C-terminus_binding	Molecular Function	13	189	442	15624	0.00285174	0.1286	2.54489	2.43137	0.0294118	CALCOCO1//CORO1A//CSK//IFT52//MAP2K1//MID1IP1//PRDX3//PTK2B//STIP1//SUMO1//TERF2//TP53//XRCC4
GO:0016301	kinase_activity	Molecular Function	36	786	442	15624	0.00306841	0.132081	2.51309	1.61901	0.081448	ADPGK//ALDH18A1//ARAF//BAZ1B//CAB39//CAMK1//CHUK//CLK2//CSK//FER//HCK//IGF2R//LRRK1//MAP2K1//MAP3K8//MAPK9//MARK3//MAST3//NADK//NRBP1//PAK1//PANK4//PI4KA//PI4KB//PIK3CB//PIK3CD//PKN1//PRKAB1//PRKAG1//PRKCD//PTK2B//RAF1//RASSF2//STK38//STK40//TEC
GO:0043021	ribonucleoprotein_complex_binding	Molecular Function	10	131	442	15624	0.00407556	0.167807	2.38981	2.69835	0.0226244	DDX5//DHX29//EEF2//EIF2S1//IFIH1//PRMT5//RPN2//SNRPB//SRP68//UNG
GO:0043812	phosphatidylinositol-4-phosphate_phosphatase_activity	Molecular Function	2	4	442	15624	0.00461329	0.174751	2.33599	17.6742	0.00452489	FIG4//SACM1L
GO:0072320	volume-sensitive_chloride_channel_activity	Molecular Function	2	4	442	15624	0.00461329	0.174751	2.33599	17.6742	0.00452489	TTYH2//TTYH3
GO:0001047	core_promoter_binding	Molecular Function	6	56	442	15624	0.00486871	0.177333	2.31259	3.78733	0.0135747	BAZ2A//FOS//GADD45A//SMARCB1//TP53//ZNF513
GO:0097110	scaffold_protein_binding	Molecular Function	6	57	442	15624	0.00531468	0.186407	2.27452	3.72089	0.0135747	CHUK//CRK//ITPR2//MAP2K1//NLGN3//NLGN4Y
GO:0003724	RNA_helicase_activity	Molecular Function	7	76	442	15624	0.00564031	0.190763	2.2487	3.25578	0.0158371	DDX42//DDX5//DDX55//DHX29//DHX38//IFIH1//MOV10
GO:0003779	actin_binding	Molecular Function	22	433	442	15624	0.00605223	0.194892	2.21808	1.79599	0.0497738	ARPC1B//CAP1//CORO1A//DAG1//DIAPH2//EEF2//EPB41L2//FLII//FLNB//GBP1//GMFG//HPCA//LASP1//LCP1//MARCKSL1//MPRIP//MYO1E//PARVG//PSTPIP2//RDX//SVIL//TMSB4Y
GO:0004713	protein_tyrosine_kinase_activity	Molecular Function	10	139	442	15624	0.00617399	0.194892	2.20943	2.54305	0.0226244	BAZ1B//CLK2//CSK//FER//HCK//IGF2R//MAP2K1//PRKCD//PTK2B//TEC
GO:0004553	hydrolase_activity,_hydrolyzing_O-glycosyl_compounds	Molecular Function	8	98	442	15624	0.0065874	0.201234	2.18129	2.88559	0.0180995	CHI3L2//GBA2//HEXB//LYZ//MGAM//NAGA//PARG//PSAP
GO:0047184	1-acylglycerophosphocholine_O-acyltransferase_activity	Molecular Function	2	5	442	15624	0.00754512	0.216522	2.12233	14.1394	0.00452489	LPCAT1//LPCAT3
GO:0052812	phosphatidylinositol-3,4-bisphosphate_5-kinase_activity	Molecular Function	2	5	442	15624	0.00754512	0.216522	2.12233	14.1394	0.00452489	PIK3CB//PIK3CD
GO:0004672	protein_kinase_activity	Molecular Function	28	612	442	15624	0.00867784	0.2392	2.06159	1.61725	0.0633484	ARAF//BAZ1B//CAB39//CAMK1//CHUK//CLK2//CSK//FER//HCK//IGF2R//LRRK1//MAP2K1//MAP3K8//MAPK9//MARK3//MAST3//NRBP1//PAK1//PKN1//PRKAB1//PRKAG1//PRKCD//PTK2B//RAF1//RASSF2//STK38//STK40//TEC
GO:0050700	CARD_domain_binding	Molecular Function	3	16	442	15624	0.00957119	0.2392	2.01903	6.62783	0.00678733	CARD16//CASP1//NOD1
GO:0070566	adenylyltransferase_activity	Molecular Function	4	30	442	15624	0.00967102	0.2392	2.01453	4.71312	0.00904977	KARS//OAS1//OAS2//OAS3
GO:0051082	unfolded_protein_binding	Molecular Function	9	127	442	15624	0.0100548	0.2392	1.99763	2.50501	0.020362	AFG3L2//DNAJA1//DNAJA3//DNAJB4//HSPE1//MDN1//NAP1L4//TOR1A//TTC1
GO:0031490	chromatin_DNA_binding	Molecular Function	8	106	442	15624	0.0103999	0.2392	1.98297	2.66781	0.0180995	BCL6//CHD4//HMGN3//NOTCH1//SMARCB1//SMARCD2//STAT3//WBP2
GO:0004301	epoxide_hydrolase_activity	Molecular Function	2	6	442	15624	0.0111067	0.2392	1.95442	11.7828	0.00452489	EPHX1//RNPEP
GO:0043237	laminin-1_binding	Molecular Function	2	6	442	15624	0.0111067	0.2392	1.95442	11.7828	0.00452489	DAG1//NID1
GO:0046934	phosphatidylinositol-4,5-bisphosphate_3-kinase_activity	Molecular Function	2	6	442	15624	0.0111067	0.2392	1.95442	11.7828	0.00452489	PIK3CB//PIK3CD
GO:1990239	steroid_hormone_binding	Molecular Function	2	6	442	15624	0.0111067	0.2392	1.95442	11.7828	0.00452489	ATP1A1//ATP1A3
GO:0008134	transcription_factor_binding	Molecular Function	30	681	442	15624	0.0111176	0.2392	1.95399	1.5572	0.0678733	ARHGEF2//BAZ2A//BRMS1//CHD4//CPNE1//CRTC3//DDX5//DNAJA1//ELK1//ENPP2//FOS//GTF2E2//HCFC1//HDAC3//HIF1AN//HMGN3//IFI27//IRF4//KLF4//MAPK9//PKN1//PSMC5//SMARCB1//STAT3//SUMO1//TAF4B//TCERG1//TP53//WBP2//ZNF366
GO:0005484	SNAP_receptor_activity	Molecular Function	4	33	442	15624	0.0135145	0.2392	1.8692	4.28466	0.00904977	SNAP23//SNAP29//STX11//STX3
GO:0044389	ubiquitin-like_protein_ligase_binding	Molecular Function	16	308	442	15624	0.0146476	0.2392	1.83423	1.83628	0.0361991	ABCB1//ATXN3//AXIN2//DNAJA1//GLMN//LTBR//MOAP1//PARP9//PSMA3//PTK2B//RANGAP1//RNF20//SUMO1//TNFRSF1B//TP53//TXNIP
GO:0004430	1-phosphatidylinositol_4-kinase_activity	Molecular Function	2	7	442	15624	0.0152601	0.2392	1.81644	10.0995	0.00452489	PI4KA//PI4KB
GO:0004679	AMP-activated_protein_kinase_activity	Molecular Function	2	7	442	15624	0.0152601	0.2392	1.81644	10.0995	0.00452489	PRKAB1//PRKAG1
GO:0004972	NMDA_glutamate_receptor_activity	Molecular Function	2	7	442	15624	0.0152601	0.2392	1.81644	10.0995	0.00452489	GRIN3A//PTK2B
GO:0035005	1-phosphatidylinositol-4-phosphate_3-kinase_activity	Molecular Function	2	7	442	15624	0.0152601	0.2392	1.81644	10.0995	0.00452489	PIK3CB//PIK3CD
GO:0016780	phosphotransferase_activity,_for_other_substituted_phosphate_groups	Molecular Function	3	19	442	15624	0.0155564	0.2392	1.80809	5.58133	0.00678733	CDIPT//PGS1//PIGN
GO:0070064	proline-rich_region_binding	Molecular Function	3	19	442	15624	0.0155564	0.2392	1.80809	5.58133	0.00678733	CSK//TCERG1//WBP4
GO:0004674	protein_serine|threonine_kinase_activity	Molecular Function	21	446	442	15624	0.0160354	0.2392	1.79492	1.66439	0.0475113	ARAF//CAB39//CAMK1//CHUK//CLK2//LRRK1//MAP2K1//MAP3K8//MAPK9//MARK3//MAST3//NRBP1//PAK1//PKN1//PRKAB1//PRKAG1//PRKCD//PTK2B//RAF1//STK38//STK40
GO:0019829	ATPase-coupled_cation_transmembrane_transporter_activity	Molecular Function	5	54	442	15624	0.0179842	0.2392	1.74511	3.273	0.0113122	ATP1A1//ATP1A3//ATP6V0E1//ATP6V1D//ATP6V1E1
GO:0031625	ubiquitin_protein_ligase_binding	Molecular Function	15	292	442	15624	0.0194257	0.2392	1.71162	1.81584	0.0339367	ABCB1//ATXN3//AXIN2//DNAJA1//GLMN//LTBR//MOAP1//PSMA3//PTK2B//RANGAP1//RNF20//SUMO1//TNFRSF1B//TP53//TXNIP
GO:0001164	RNA_polymerase_I_CORE_element_sequence-specific_DNA_binding	Molecular Function	2	8	442	15624	0.0199693	0.2392	1.69964	8.8371	0.00452489	BAZ2A//SMARCB1
GO:0034596	phosphatidylinositol_phosphate_4-phosphatase_activity	Molecular Function	2	8	442	15624	0.0199693	0.2392	1.69964	8.8371	0.00452489	FIG4//SACM1L
GO:0015278	calcium-release_channel_activity	Molecular Function	3	21	442	15624	0.0204822	0.2392	1.68862	5.04977	0.00678733	ITPR2//MCOLN1//RASA3
GO:0045296	cadherin_binding	Molecular Function	16	322	442	15624	0.0212983	0.2392	1.67166	1.75644	0.0361991	AHSA1//DHX29//DOCK9//EEF2//FLNB//HCFC1//LASP1//MPRIP//PACSIN2//PCMT1//PI4KA//PKP4//RANGAP1//RDX//STK38//TRIM25
GO:0015248	sterol_transporter_activity	Molecular Function	3	22	442	15624	0.0232294	0.2392	1.63396	4.82024	0.00678733	ABCG1//GRAMD1A//NPC1
GO:0046961	proton-transporting_ATPase_activity,_rotational_mechanism	Molecular Function	3	22	442	15624	0.0232294	0.2392	1.63396	4.82024	0.00678733	ATP6V0E1//ATP6V1D//ATP6V1E1
GO:0042625	ATPase-coupled_ion_transmembrane_transporter_activity	Molecular Function	5	58	442	15624	0.0237928	0.2392	1.62355	3.04728	0.0113122	ATP1A1//ATP1A3//ATP6V0E1//ATP6V1D//ATP6V1E1
GO:0050839	cell_adhesion_molecule_binding	Molecular Function	22	494	442	15624	0.0245052	0.2392	1.61074	1.57422	0.0497738	ADAM8//AHSA1//DHX29//DOCK9//EEF2//FERMT3//FLNB//HCFC1//LASP1//LCP1//MPRIP//NLGN3//NLGN4Y//PACSIN2//PCMT1//PI4KA//PKP4//PVR//RANGAP1//RDX//STK38//TRIM25
GO:0005225	volume-sensitive_anion_channel_activity	Molecular Function	2	9	442	15624	0.0251996	0.2392	1.59861	7.8552	0.00452489	TTYH2//TTYH3
GO:0031492	nucleosomal_DNA_binding	Molecular Function	4	40	442	15624	0.025881	0.2392	1.58702	3.53484	0.00904977	CHD4//HMGN3//SMARCB1//SMARCD2
GO:0019865	immunoglobulin_binding	Molecular Function	3	24	442	15624	0.0292923	0.241976	1.53325	4.41855	0.00678733	FCGR3A//FCGR3B//LILRA2
GO:0003727	single-stranded_RNA_binding	Molecular Function	6	83	442	15624	0.0301013	0.241976	1.52142	2.55531	0.0135747	CBX4//CNBP//IFIH1//JMJD6//PABPC4//PTBP1
GO:0042626	ATPase-coupled_transmembrane_transporter_activity	Molecular Function	7	106	442	15624	0.0308003	0.241976	1.51144	2.33433	0.0158371	ABCB1//ABCG1//ATP1A1//ATP1A3//ATP6V0E1//ATP6V1D//ATP6V1E1
GO:0008603	cAMP-dependent_protein_kinase_regulator_activity	Molecular Function	2	10	442	15624	0.0309178	0.241976	1.50979	7.06968	0.00452489	PKIG//PRKAG1
GO:0015165	pyrimidine_nucleotide-sugar_transmembrane_transporter_activity	Molecular Function	2	10	442	15624	0.0309178	0.241976	1.50979	7.06968	0.00452489	SLC35A5//SLC35D2
GO:0016303	1-phosphatidylinositol-3-kinase_activity	Molecular Function	2	10	442	15624	0.0309178	0.241976	1.50979	7.06968	0.00452489	PIK3CB//PIK3CD
GO:0016803	ether_hydrolase_activity	Molecular Function	2	10	442	15624	0.0309178	0.241976	1.50979	7.06968	0.00452489	EPHX1//RNPEP
GO:0030957	Tat_protein_binding	Molecular Function	2	10	442	15624	0.0309178	0.241976	1.50979	7.06968	0.00452489	DNAJA1//SMARCB1
GO:0098505	G-rich_strand_telomeric_DNA_binding	Molecular Function	2	10	442	15624	0.0309178	0.241976	1.50979	7.06968	0.00452489	HNRNPA2B1//TERF2
GO:0043178	alcohol_binding	Molecular Function	6	84	442	15624	0.0316745	0.245867	1.49929	2.52489	0.0135747	ABCG1//CDIPT//GLE1//GRAMD1A//ITPR2//NPC1
GO:0001671	ATPase_activator_activity	Molecular Function	3	25	442	15624	0.0326066	0.251044	1.48669	4.24181	0.00678733	AHSA1//DNAJA1//DNAJB4
GO:0005391	sodium:potassium-exchanging_ATPase_activity	Molecular Function	2	11	442	15624	0.0370924	0.27371	1.43072	6.42698	0.00452489	ATP1A1//ATP1A3
GO:0019864	IgG_binding	Molecular Function	2	11	442	15624	0.0370924	0.27371	1.43072	6.42698	0.00452489	FCGR3A//FCGR3B
GO:0043560	insulin_receptor_substrate_binding	Molecular Function	2	11	442	15624	0.0370924	0.27371	1.43072	6.42698	0.00452489	PIK3CB//PRKCD
GO:0089720	caspase_binding	Molecular Function	2	11	442	15624	0.0370924	0.27371	1.43072	6.42698	0.00452489	CARD16//CARD17
GO:0042826	histone_deacetylase_binding	Molecular Function	7	111	442	15624	0.0381567	0.27371	1.41843	2.22918	0.0158371	BRMS1//CHD4//HDAC3//KCTD21//KLF4//PKN1//TP53
GO:0002039	p53_binding	Molecular Function	5	66	442	15624	0.0387276	0.27371	1.41198	2.67791	0.0113122	EEF2//PRMT5//RNF20//SMARCB1//TP53
GO:0004386	helicase_activity	Molecular Function	9	161	442	15624	0.0396365	0.27371	1.4019	1.976	0.020362	CHD4//DDX42//DDX5//DDX55//DHX29//DHX38//DNA2//IFIH1//MOV10
GO:0016922	nuclear_receptor_binding	Molecular Function	7	112	442	15624	0.0397548	0.27371	1.40061	2.20928	0.0158371	BAZ2A//DDX5//PKN1//STAT3//SUMO1//WBP2//ZNF366
GO:0008066	glutamate_receptor_activity	Molecular Function	3	27	442	15624	0.0397937	0.27371	1.40019	3.9276	0.00678733	GRIN3A//GRM8//PTK2B
GO:0099604	ligand-gated_calcium_channel_activity	Molecular Function	3	27	442	15624	0.0397937	0.27371	1.40019	3.9276	0.00678733	ITPR2//MCOLN1//RASA3
GO:0003730	mRNA_3'-UTR_binding	Molecular Function	6	90	442	15624	0.0422356	0.27371	1.37432	2.35656	0.0135747	CPSF1//DDX5//HNRNPA2B1//PABPC4//RNF20//TP53
GO:0004438	phosphatidylinositol-3-phosphatase_activity	Molecular Function	2	12	442	15624	0.043693	0.27371	1.35959	5.8914	0.00452489	FIG4//SACM1L
GO:0008554	sodium_transmembrane_transporter_activity,_phosphorylative_mechanism	Molecular Function	2	12	442	15624	0.043693	0.27371	1.35959	5.8914	0.00452489	ATP1A1//ATP1A3
GO:0035004	phosphatidylinositol_3-kinase_activity	Molecular Function	2	12	442	15624	0.043693	0.27371	1.35959	5.8914	0.00452489	PIK3CB//PIK3CD
GO:0016787	hydrolase_activity	Molecular Function	86	2561	442	15624	0.0467442	0.27371	1.33027	1.18702	0.19457	ABCB1//ABCG1//ADAM8//AFG3L2//ANKZF1//APOBEC3B//ASAH1//ATP1A1//ATP6V0E1//ATP6V1E1//ATXN3//BAP1//BRMS1//BST1//BTD//CANT1//CASP1//CHD4//CHI3L2//CNP//CORIN//CPNE1//CPVL//CTSO//DDX42//DDX5//DDX55//DHX29//DHX38//DNA2//DYNC2LI1//ECE1//EEF2//ENPP2//EPHX1//FGL2//FIG4//GBA2//GBP1//GNAI2//GNPDA1//GSPT1//HDAC3//HEXB//IFIH1//LACTB//LGMN//LYZ//MDN1//MGAM//MINPP1//MOV10//MYO1E//NAGA//PANK4//PAPPA2//PARG//PCSK7/…
GO:0004112	cyclic-nucleotide_phosphodiesterase_activity	Molecular Function	3	29	442	15624	0.0477119	0.27371	1.32137	3.65673	0.00678733	CNP//PDE6D//PDE8A
GO:0035258	steroid_hormone_receptor_binding	Molecular Function	6	93	442	15624	0.0482558	0.27371	1.31645	2.28054	0.0135747	DDX5//PKN1//STAT3//SUMO1//WBP2//ZNF366
GO:0019903	protein_phosphatase_binding	Molecular Function	8	142	442	15624	0.0487877	0.27371	1.31169	1.99146	0.0180995	ANAPC7//CSK//FER//GRIN3A//PPP1R15A//STAT3//STAT6//TP53
GO:1990841	promoter-specific_chromatin_binding	Molecular Function	4	49	442	15624	0.0493265	0.27371	1.30692	2.88559	0.00904977	DDX5//DNMT1//KLF4//TP53
GO:0016887	ATPase_activity	Molecular Function	19	445	442	15624	0.0496439	0.27371	1.30413	1.50926	0.0429864	ABCB1//ABCG1//CHD4//DDX42//DDX5//DDX55//DHX29//DHX38//DNA2//DYNC2LI1//IFIH1//MDN1//MOV10//MYO1E//PSMC3//PSMC5//TOR1A//TOR1B//WRNIP1
GO:0005496	steroid_binding	Molecular Function	6	94	442	15624	0.0503742	0.27371	1.29779	2.25628	0.0135747	ABCG1//ATP1A1//ATP1A3//GRAMD1A//NPC1//PGRMC1
GO:0031491	nucleosome_binding	Molecular Function	5	71	442	15624	0.0504237	0.27371	1.29737	2.48933	0.0113122	CHD4//HMGN3//NAP1L4//SMARCB1//SMARCD2
GO:0005338	nucleotide-sugar_transmembrane_transporter_activity	Molecular Function	2	13	442	15624	0.0506907	0.27371	1.29507	5.43822	0.00452489	SLC35A5//SLC35D2
GO:0008179	adenylate_cyclase_binding	Molecular Function	2	13	442	15624	0.0506907	0.27371	1.29507	5.43822	0.00452489	CAP1//RAF1
GO:0042043	neurexin_family_protein_binding	Molecular Function	2	13	442	15624	0.0506907	0.27371	1.29507	5.43822	0.00452489	NLGN3//NLGN4Y
GO:0043047	single-stranded_telomeric_DNA_binding	Molecular Function	2	13	442	15624	0.0506907	0.27371	1.29507	5.43822	0.00452489	HNRNPA2B1//TERF2
GO:0016740	transferase_activity	Molecular Function	79	2347	442	15624	0.0534603	0.27371	1.27197	1.18983	0.178733	ACSM3//ADPGK//AKTIP//ALDH18A1//ARAF//BAZ1B//BST1//CAB39//CAMK1//CBX4//CDIPT//CHUK//CLK2//CMAS//CROT//CSK//DNMT1//EXTL2//FER//GALNT2//GBA2//GFPT2//HCFC1//HCK//HEXB//IGF2R//KARS//LPCAT1//LPCAT3//LRRK1//MAP2K1//MAP3K8//MAPK9//MARK3//MAST3//NADK//NAMPT//NRBP1//OAS1//OAS2//OAS3//PAK1//PANK4//PARP9//PCMT1//PGS1//PI4KA//PI4KB//PIGN//PIK3CB//PIK3CD//PKN1//PRKAB1//PRKAG1//PRKCD//PRMT5//PTK2B//PYGM//RAF1//…
GO:0030695	GTPase_regulator_activity	Molecular Function	14	308	442	15624	0.0557826	0.27371	1.2535	1.60675	0.0316742	ARFGAP2//ARHGAP15//ARHGAP30//DNAJA3//DOCK2//GDI1//PDE6D//RANGAP1//RASA3//RGS2//RIC8B//RIN2//SEC23B//TBC1D22B
GO:0071889	14-3-3_protein_binding	Molecular Function	3	31	442	15624	0.0563398	0.27502	1.24918	3.42081	0.00678733	FOXK1//PI4KB//TBC1D22B
GO:0001158	enhancer_sequence-specific_DNA_binding	Molecular Function	7	122	442	15624	0.058152	0.28241	1.23544	2.02819	0.0158371	CALCOCO1//CHD4//HCFC1//IRF7//SMARCB1//SMARCD2//TP53
GO:0000295	adenine_nucleotide_transmembrane_transporter_activity	Molecular Function	2	15	442	15624	0.0657682	0.299326	1.18198	4.71312	0.00452489	SLC25A41//SLC35B3
GO:0015926	glucosidase_activity	Molecular Function	2	15	442	15624	0.0657682	0.299326	1.18198	4.71312	0.00452489	GBA2//MGAM
GO:0015929	hexosaminidase_activity	Molecular Function	2	15	442	15624	0.0657682	0.299326	1.18198	4.71312	0.00452489	HEXB//NAGA
GO:0043024	ribosomal_small_subunit_binding	Molecular Function	2	15	442	15624	0.0657682	0.299326	1.18198	4.71312	0.00452489	DHX29//UNG
GO:0098847	sequence-specific_single_stranded_DNA_binding	Molecular Function	2	15	442	15624	0.0657682	0.299326	1.18198	4.71312	0.00452489	HNRNPA2B1//TERF2
GO:0016811	hydrolase_activity,_acting_on_carbon-nitrogen_(but_not_peptide)_bonds,_in_linear_amides	Molecular Function	5	77	442	15624	0.0669113	0.299326	1.1745	2.29535	0.0113122	ASAH1//BRMS1//BTD//HDAC3//VNN2
GO:0016874	ligase_activity	Molecular Function	8	152	442	15624	0.0672462	0.299326	1.17233	1.86044	0.0180995	ACSM3//KARS//PCCB//QARS//TRIM25//TTLL1//XRCC4//YARS
GO:0000980	RNA_polymerase_II_distal_enhancer_sequence-specific_DNA_binding	Molecular Function	6	102	442	15624	0.0693541	0.299326	1.15893	2.07932	0.0135747	CALCOCO1//CHD4//HCFC1//SMARCB1//SMARCD2//TP53
GO:0000979	RNA_polymerase_II_core_promoter_sequence-specific_DNA_binding	Molecular Function	3	34	442	15624	0.0705553	0.299326	1.15147	3.11898	0.00678733	FOS//GADD45A//ZNF513
GO:0035257	nuclear_hormone_receptor_binding	Molecular Function	8	155	442	15624	0.0735207	0.299326	1.13359	1.82443	0.0180995	BAZ2A//DDX5//HMGN3//PKN1//STAT3//SUMO1//WBP2//ZNF366
GO:0004697	protein_kinase_C_activity	Molecular Function	2	16	442	15624	0.0737963	0.299326	1.13197	4.41855	0.00452489	PKN1//PRKCD
GO:0008656	cysteine-type_endopeptidase_activator_activity_involved_in_apoptotic_process	Molecular Function	2	16	442	15624	0.0737963	0.299326	1.13197	4.41855	0.00452489	CASP1//NOD1
GO:0015216	purine_nucleotide_transmembrane_transporter_activity	Molecular Function	2	16	442	15624	0.0737963	0.299326	1.13197	4.41855	0.00452489	SLC25A41//SLC35B3
GO:0016307	phosphatidylinositol_phosphate_kinase_activity	Molecular Function	2	16	442	15624	0.0737963	0.299326	1.13197	4.41855	0.00452489	PIK3CB//PIK3CD
GO:0032183	SUMO_binding	Molecular Function	2	16	442	15624	0.0737963	0.299326	1.13197	4.41855	0.00452489	CBX4//HABP4
GO:0035259	glucocorticoid_receptor_binding	Molecular Function	2	16	442	15624	0.0737963	0.299326	1.13197	4.41855	0.00452489	STAT3//SUMO1
GO:0070403	NAD+_binding	Molecular Function	2	16	442	15624	0.0737963	0.299326	1.13197	4.41855	0.00452489	ALDH1A3//PARP9
GO:0001103	RNA_polymerase_II_repressing_transcription_factor_binding	Molecular Function	3	35	442	15624	0.0756186	0.299326	1.12137	3.02986	0.00678733	CHD4//STAT3//TCERG1
GO:0015662	ion_transmembrane_transporter_activity,_phosphorylative_mechanism	Molecular Function	3	35	442	15624	0.0756186	0.299326	1.12137	3.02986	0.00678733	ATP1A1//ATP1A3//ATP6V1E1
GO:0003676	nucleic_acid_binding	Molecular Function	129	4078	442	15624	0.0756779	0.299326	1.12103	1.11818	0.291855	AIM2//ALDH18A1//ANKZF1//API5//APOBEC3B//ARID4A//BAZ2A//BCL6//BST2//CALCOCO1//CBX4//CHD4//CHERP//CNBP//CNP//CORO1A//CPSF1//DDX42//DDX5//DDX55//DEDD2//DHX29//DHX38//DNA2//DNMT1//DNTTIP2//EEF2//EIF2S1//ELK1//ENPP2//EWSR1//FAM32A//FLNB//FOS//FOXK1//GADD45A//GRN//GSPT1//GTF2E2//HABP4//HCFC1//HMGN3//HNRNPA2B1//HNRNPAB//HNRNPCL1//HSPE1//IFIH1//IRF4//IRF7//IRF8//JMJD6//KARS//KLF4//LLPH//MAP4//MNDA//MOV10…
GO:0043621	protein_self-association	Molecular Function	4	57	442	15624	0.0774	0.299326	1.11126	2.48059	0.00904977	ADAM8//CRK//TMEM43//TP53
GO:0042169	SH2_domain_binding	Molecular Function	3	36	442	15624	0.0808375	0.299326	1.09239	2.9457	0.00678733	CRK//DAG1//RUFY1
GO:0043022	ribosome_binding	Molecular Function	4	58	442	15624	0.081371	0.299326	1.08953	2.43782	0.00904977	EEF2//EIF2S1//RPN2//SRP68
GO:0005229	intracellular_calcium_activated_chloride_channel_activity	Molecular Function	2	17	442	15624	0.0821183	0.299326	1.08556	4.15864	0.00452489	TTYH2//TTYH3
GO:0035173	histone_kinase_activity	Molecular Function	2	17	442	15624	0.0821183	0.299326	1.08556	4.15864	0.00452489	BAZ1B//PKN1
GO:0036002	pre-mRNA_binding	Molecular Function	3	37	442	15624	0.0862077	0.311598	1.06445	2.86609	0.00678733	DDX5//HNRNPA2B1//PTBP1
GO:0051427	hormone_receptor_binding	Molecular Function	9	188	442	15624	0.0866202	0.311899	1.06238	1.69221	0.020362	BAZ2A//DDX5//HMGN3//PKN1//PSMC5//STAT3//SUMO1//WBP2//ZNF366
GO:0016667	oxidoreductase_activity,_acting_on_a_sulfur_group_of_donors	Molecular Function	4	60	442	15624	0.0896077	0.321434	1.04765	2.35656	0.00904977	PDIA6//PRDX3//QSOX2//TXNRD1
GO:0010485	H4_histone_acetyltransferase_activity	Molecular Function	2	18	442	15624	0.0907111	0.322945	1.04234	3.9276	0.00452489	HCFC1//USP22
GO:0030676	Rac_guanyl-nucleotide_exchange_factor_activity	Molecular Function	2	18	442	15624	0.0907111	0.322945	1.04234	3.9276	0.00452489	ARHGEF2//DOCK2
GO:0035326	enhancer_binding	Molecular Function	7	136	442	15624	0.0915042	0.324118	1.03856	1.8194	0.0158371	CALCOCO1//CHD4//HCFC1//IRF7//SMARCB1//SMARCD2//TP53
GO:0042162	telomeric_DNA_binding	Molecular Function	3	38	442	15624	0.0917249	0.324118	1.03751	2.79066	0.00678733	HNRNPA2B1//TERF2//UPF2
GO:0005096	GTPase_activator_activity	Molecular Function	12	277	442	15624	0.0954768	0.327597	1.0201	1.53134	0.0271493	ARFGAP2//ARHGAP15//ARHGAP30//DOCK2//GDI1//RANGAP1//RASA3//RGS2//RIC8B//RIN2//SEC23B//TBC1D22B
GO:0008092	cytoskeletal_protein_binding	Molecular Function	35	985	442	15624	0.0967475	0.327597	1.01436	1.25604	0.0791855	ACTR1B//ARHGEF2//ARPC1B//ATP1A1//CAP1//CETN3//CORO1A//CRK//DAG1//DIAPH2//EEF2//EPB41L2//FLII//FLNB//GBP1//GMFG//HPCA//LASP1//LCP1//LGMN//MAP4//MARCKSL1//MARK3//MPRIP//MYO1E//PACSIN2//PARVG//PKD2L1//PSTPIP2//RDX//RGS2//SVIL//TMSB4Y//TOR1A//TOR1B
GO:0043531	ADP_binding	Molecular Function	3	39	442	15624	0.0973846	0.327597	1.01151	2.71911	0.00678733	ABCG1//ATP1A1//PRKAG1
GO:0004970	ionotropic_glutamate_receptor_activity	Molecular Function	2	19	442	15624	0.0995528	0.327597	1.00195	3.72089	0.00452489	GRIN3A//PTK2B
GO:0016505	peptidase_activator_activity_involved_in_apoptotic_process	Molecular Function	2	19	442	15624	0.0995528	0.327597	1.00195	3.72089	0.00452489	CASP1//NOD1
GO:0035014	phosphatidylinositol_3-kinase_regulator_activity	Molecular Function	2	19	442	15624	0.0995528	0.327597	1.00195	3.72089	0.00452489	KLF4//PIK3R5
GO:0070300	phosphatidic_acid_binding	Molecular Function	2	19	442	15624	0.0995528	0.327597	1.00195	3.72089	0.00452489	MAPKAP1//PACSIN2
GO:0120020	cholesterol_transfer_activity	Molecular Function	2	19	442	15624	0.0995528	0.327597	1.00195	3.72089	0.00452489	ABCG1//GRAMD1A
GO:0019900	kinase_binding	Molecular Function	27	735	442	15624	0.0998671	0.327597	1.00058	1.29851	0.061086	ATP1A1//CAB39//CAMK2N2//CARD16//CASP1//CRK//CSK//EEF2//GADD45A//HPCA//MAPKAP1//NEDD9//PAK1//PDE8A//PKN1//PPP1R15A//PRDX3//PRKAB1//PRKAG1//PRKCD//PTK2B//QARS//RAF1//STAT3//STK38//TNIP2//TP53

## Sheet: up. BP_result
ID	Term	Ontology	Count	Size	numInt	numTotal	p_value	fdr	Enrichment_Score	Fold_Enrichment	GeneRatio	Genes
GO:0071280	cellular_response_to_copper_ion	Biological Process	10	30	314	17492	6.58594e-11	1.9176e-07	10.1814	18.569	0.0318471	CYP1A2//MT1A//MT1B//MT1E//MT1F//MT1G//MT1H//MT1L//MT1X//PRNP
GO:0010273	detoxification_of_copper_ion	Biological Process	8	16	314	17492	1.12075e-10	1.9176e-07	9.95049	27.8535	0.0254777	MT1A//MT1B//MT1E//MT1F//MT1G//MT1H//MT1L//MT1X
GO:0046688	response_to_copper_ion	Biological Process	11	45	314	17492	3.08793e-10	3.15941e-07	9.51033	13.6173	0.0350318	AANAT//CYP1A2//MT1A//MT1B//MT1E//MT1F//MT1G//MT1H//MT1L//MT1X//PRNP
GO:0097501	stress_response_to_metal_ion	Biological Process	8	18	314	17492	3.69306e-10	3.15941e-07	9.43261	24.7587	0.0254777	MT1A//MT1B//MT1E//MT1F//MT1G//MT1H//MT1L//MT1X
GO:0071276	cellular_response_to_cadmium_ion	Biological Process	10	38	314	17492	9.12454e-10	6.09578e-07	9.03979	14.6597	0.0318471	CYP1A2//JUN//MT1A//MT1B//MT1E//MT1F//MT1G//MT1H//MT1L//MT1X
GO:0046686	response_to_cadmium_ion	Biological Process	12	63	314	17492	1.06881e-09	6.09578e-07	8.9711	10.6109	0.0382166	CYP1A2//JUN//MT1A//MT1B//MT1E//MT1F//MT1G//MT1H//MT1L//MT1X//PRNP//TERT
GO:0071294	cellular_response_to_zinc_ion	Biological Process	8	24	314	17492	5.65086e-09	2.76246e-06	8.24789	18.569	0.0254777	MT1A//MT1B//MT1E//MT1F//MT1G//MT1H//MT1L//MT1X
GO:0010043	response_to_zinc_ion	Biological Process	10	54	314	17492	3.58237e-08	1.53236e-05	7.44583	10.3161	0.0318471	AANAT//MT1A//MT1B//MT1E//MT1F//MT1G//MT1H//MT1L//MT1X//SLC30A2
GO:0006882	cellular_zinc_ion_homeostasis	Biological Process	8	33	314	17492	9.26767e-08	3.52377e-05	7.03303	13.5047	0.0254777	MT1A//MT1B//MT1E//MT1F//MT1G//MT1H//MT1L//MT1X
GO:0055069	zinc_ion_homeostasis	Biological Process	8	36	314	17492	1.92743e-07	6.59566e-05	6.71502	12.3793	0.0254777	MT1A//MT1B//MT1E//MT1F//MT1G//MT1H//MT1L//MT1X
GO:0071248	cellular_response_to_metal_ion	Biological Process	16	190	314	17492	3.43078e-07	0.000106728	6.46461	4.69112	0.0509554	CACNA1H//CPNE6//CPNE7//CYP1A2//JUN//MT1A//MT1B//MT1E//MT1F//MT1G//MT1H//MT1L//MT1X//NEUROD2//NFATC4//PRNP
GO:0010038	response_to_metal_ion	Biological Process	22	366	314	17492	8.3072e-07	0.000236894	6.08055	3.34851	0.0700637	AANAT//CACNA1H//CASP8//CPNE6//CPNE7//CYP1A2//DRD2//JUN//MT1A//MT1B//MT1E//MT1F//MT1G//MT1H//MT1L//MT1X//NEUROD2//NFATC4//PRNP//SLC30A2//SNCB//TERT
GO:0071241	cellular_response_to_inorganic_substance	Biological Process	16	218	314	17492	2.14559e-06	0.000564785	5.66845	4.08859	0.0509554	CACNA1H//CPNE6//CPNE7//CYP1A2//JUN//MT1A//MT1B//MT1E//MT1F//MT1G//MT1H//MT1L//MT1X//NEUROD2//NFATC4//PRNP
GO:2000297	negative_regulation_of_synapse_maturation	Biological Process	3	3	314	17492	5.7304e-06	0.00140067	5.24182	55.707	0.00955414	ARHGEF15//NEUROD2//NFATC4
GO:0010035	response_to_inorganic_substance	Biological Process	25	529	314	17492	1.11354e-05	0.00254036	4.95329	2.63266	0.0796178	AANAT//CACNA1H//CASP8//CCL19//CPNE6//CPNE7//CYP1A2//DRD2//GNAO1//JUN//MT1A//MT1B//MT1E//MT1F//MT1G//MT1H//MT1L//MT1X//NEUROD2//NFATC4//PRNP//SLC30A2//SNCB//TERT//UCP3
GO:1901216	positive_regulation_of_neuron_death	Biological Process	9	93	314	17492	4.42757e-05	0.00946946	4.35383	5.391	0.0286624	BAX//CASP8//CTSZ//GRIK5//JUN//PITX3//PRNP//REST//SSH1
GO:0090128	regulation_of_synapse_maturation	Biological Process	4	14	314	17492	8.8459e-05	0.0178063	4.05326	15.9163	0.0127389	ARHGEF15//CLSTN1//NEUROD2//NFATC4
GO:0043523	regulation_of_neuron_apoptotic_process	Biological Process	12	209	314	17492	0.000409848	0.0776463	3.38738	3.19849	0.0382166	BAX//CTSZ//GDNF//GRIK5//JUN//MT1F//NFATC4//PITX3//PRNP//SET//SNCB//TERT
GO:1901030	positive_regulation_of_mitochondrial_outer_membrane_permeabilization_involved_in_apoptotic_signaling_pathway	Biological Process	5	36	314	17492	0.000431116	0.0776463	3.36541	7.73708	0.0159236	BAX//CASP8//CHCHD10//PPP3R1//SFN
GO:0043525	positive_regulation_of_neuron_apoptotic_process	Biological Process	6	56	314	17492	0.000486958	0.0792165	3.31251	5.96861	0.0191083	BAX//CTSZ//GRIK5//JUN//PITX3//PRNP
GO:0007006	mitochondrial_membrane_organization	Biological Process	9	128	314	17492	0.000508097	0.0792165	3.29405	3.9169	0.0286624	ALKBH7//BAX//CASP8//CHCHD10//PPP3R1//ROMO1//SFN//TIMM9//TOMM20
GO:1901214	regulation_of_neuron_death	Biological Process	15	310	314	17492	0.000509282	0.0792165	3.29304	2.6955	0.0477707	BAX//CASP8//CTSZ//GDNF//GRIK5//JUN//MT1F//NFATC4//PITX3//PRNP//REST//SET//SNCB//SSH1//TERT
GO:0006875	cellular_metal_ion_homeostasis	Biological Process	22	563	314	17492	0.000559525	0.0831831	3.25218	2.17683	0.0700637	AGTR1//AVP//BAX//C7//CACNA1C//CCL19//CCR10//CIB2//CYSLTR1//DRD2//IAPP//MT1A//MT1B//MT1E//MT1F//MT1G//MT1H//MT1L//MT1X//PLA2G1B//PRNP//SCARA5
GO:0019932	second-messenger-mediated_signaling	Biological Process	16	348	314	17492	0.0005834	0.0831831	3.23403	2.56124	0.0509554	ADRA2C//AGTR1//AHR//CACNA1C//CCR10//DRD2//GPHB5//GPR78//IAPP//LGR4//MAFA//MT1F//NFATC4//PPP3R1//PRNP//RCAN3
GO:1902445	regulation_of_mitochondrial_membrane_permeability_involved_in_programmed_necrotic_cell_death	Biological Process	2	3	314	17492	0.000952238	0.130342	3.02125	37.138	0.00636943	ALKBH7//BAX
GO:0055065	metal_ion_homeostasis	Biological Process	23	629	314	17492	0.00103575	0.13632	2.98475	2.03698	0.0732484	AGTR1//AVP//BAX//C7//CACNA1C//CCL19//CCR10//CIB2//CYSLTR1//DRD2//IAPP//MT1A//MT1B//MT1E//MT1F//MT1G//MT1H//MT1L//MT1X//PLA2G1B//PRNP//SCARA5//XIAP
GO:0045926	negative_regulation_of_growth	Biological Process	12	239	314	17492	0.00132797	0.165518	2.87681	2.797	0.0382166	MAPK11//MT1A//MT1B//MT1E//MT1F//MT1G//MT1H//MT1L//MT1X//PLXNA3//SEMA6B//TNR
GO:1901028	regulation_of_mitochondrial_outer_membrane_permeabilization_involved_in_apoptotic_signaling_pathway	Biological Process	5	46	314	17492	0.00135433	0.165518	2.86828	6.05511	0.0159236	BAX//CASP8//CHCHD10//PPP3R1//SFN
GO:0030154	cell_differentiation	Biological Process	88	3657	314	17492	0.00150576	0.17768	2.82224	1.3405	0.280255	ACIN1//ADAM12//ADRA2C//AIRE//ALCAM//ARTN//BAX//C12orf57//CACNA1H//CASP8//CCIN//CCL19//CHAC1//CHRNB2//COL4A2//CPNE6//CSRP2//CTSZ//DAPK3//DDX6//DEAF1//DHH//DRD2//DSPP//EMD//FN3K//FOXC1//FOXD1//FOXD3//FOXN2//FOXS1//FSCN2//GDF1//GDNF//GNAO1//GPC1//GPC2//IFNA4//IL7R//JUN//KRT9//KRTAP1-3//KRTAP10-10//KRTAP19-1//KRTAP5-9//KRTAP8-1//LCE1F//LCE2A//LCE2C//LGR4//MATN4//MDFI//MESP1//METRN//MT1G//MTF2//NCAPH2…
GO:0046902	regulation_of_mitochondrial_membrane_permeability	Biological Process	6	72	314	17492	0.00184476	0.195143	2.73406	4.64225	0.0191083	ALKBH7//BAX//CASP8//CHCHD10//PPP3R1//SFN
GO:0009181	purine_ribonucleoside_diphosphate_catabolic_process	Biological Process	2	4	314	17492	0.00188186	0.195143	2.72541	27.8535	0.00636943	ENTPD2//NUDT18
GO:0097296	activation_of_cysteine-type_endopeptidase_activity_involved_in_apoptotic_signaling_pathway	Biological Process	2	4	314	17492	0.00188186	0.195143	2.72541	27.8535	0.00636943	BAX//CASP8
GO:0106077	histone_succinylation	Biological Process	2	4	314	17492	0.00188186	0.195143	2.72541	27.8535	0.00636943	DLST//OGDH
GO:0050807	regulation_of_synapse_organization	Biological Process	11	220	314	17492	0.00215389	0.202234	2.66678	2.78535	0.0350318	ARHGEF15//CHRNB2//CLSTN1//DRD2//LRFN1//LRFN3//NEUROD2//NFATC4//NLGN2//PRNP//SSH1
GO:0051899	membrane_depolarization	Biological Process	5	51	314	17492	0.00215781	0.202234	2.66599	5.46147	0.0159236	CACNA1C//CACNA1H//CHRNA4//CHRNB2//JUN
GO:0009636	response_to_toxic_substance	Biological Process	19	508	314	17492	0.00216587	0.202234	2.66437	2.08353	0.0605096	AHR//APOM//AVP//BAX//CASP8//CHRNA4//CHRNB2//DRD2//GNAO1//GPX4//JUN//MT1A//MT1B//MT1E//MT1F//MT1G//MT1H//MT1L//MT1X
GO:0006658	phosphatidylserine_metabolic_process	Biological Process	4	31	314	17492	0.00218664	0.202234	2.66022	7.188	0.0127389	PLA2G1B//PLA2G2D//PLA2G4D//SLC27A1
GO:0008306	associative_learning	Biological Process	6	76	314	17492	0.00243197	0.214407	2.61404	4.39792	0.0191083	CHRNB2//DEAF1//DRD2//NEUROD2//SHANK1//TNR
GO:0048856	anatomical_structure_development	Biological Process	120	5366	314	17492	0.00244356	0.214407	2.61198	1.24578	0.382166	ACIN1//ADAM12//ADRA2C//AGTR1//AHR//AIRE//ALCAM//APH1A//ARHGEF15//ARTN//ASH1L//ASTN2//BAX//C12orf57//CACNA1C//CACNA1H//CASP8//CASZ1//CCIN//CCL19//CHAC1//CHRNB2//COL4A2//COL9A1//COX6B1//CPNE6//CSH2//CSRP2//CTSZ//CYP1A2//DAPK3//DDX6//DEAF1//DHH//DRD2//DSPP//EMD//FN3K//FOXC1//FOXD1//FOXD3//FOXN2//FOXS1//FSCN2//GDF1//GDNF//GFI1B//GH2//GNAO1//GNRH2//GPC1//GPC2//GPX4//HMX1//IFNA4//IL7R//JUN//KRT9//KRTAP…
GO:0032225	regulation_of_synaptic_transmission,_dopaminergic	Biological Process	3	16	314	17492	0.00269752	0.217176	2.56904	10.4451	0.00955414	CHRNB2//DRD2//GDNF
GO:0007275	multicellular_organism_development	Biological Process	112	4961	314	17492	0.00270049	0.217176	2.56856	1.25765	0.356688	ACIN1//ADRA2C//AGTR1//AHR//AIRE//ALCAM//APH1A//ARHGEF15//ARTN//ASH1L//BAX//C12orf57//CACNA1C//CACNA1H//CASP8//CASZ1//CCIN//CCL19//CHAC1//CHRNB2//COL4A2//COL9A1//COX6B1//CPNE6//CSH2//CSRP2//CTSZ//CYP1A2//DAPK3//DDX6//DEAF1//DHH//DRD2//DSPP//EMD//FOXC1//FOXD1//FOXD3//FOXN2//FOXS1//FSCN2//GDNF//GFI1B//GH2//GNAO1//GNRH2//GPC1//GPC2//GPX4//HMX1//IFNA4//IL7R//JUN//KRT9//KRTAP1-3//KRTAP10-10//KRTAP19-1/…
GO:0007616	long-term_memory	Biological Process	4	33	314	17492	0.00276489	0.217176	2.55832	6.75236	0.0127389	DRD2//NFATC4//PRNP//SHANK1
GO:0010955	negative_regulation_of_protein_processing	Biological Process	4	33	314	17492	0.00276489	0.217176	2.55832	6.75236	0.0127389	CHAC1//CTSZ//PRNP//XIAP
GO:0030003	cellular_cation_homeostasis	Biological Process	22	639	314	17492	0.00279245	0.217176	2.55401	1.91793	0.0700637	AGTR1//AVP//BAX//C7//CACNA1C//CCL19//CCR10//CIB2//CYSLTR1//DRD2//IAPP//MT1A//MT1B//MT1E//MT1F//MT1G//MT1H//MT1L//MT1X//PLA2G1B//PRNP//SCARA5
GO:0033603	positive_regulation_of_dopamine_secretion	Biological Process	2	5	314	17492	0.00309924	0.230557	2.50874	22.2828	0.00636943	CHRNB2//GDNF
GO:0061737	leukotriene_signaling_pathway	Biological Process	2	5	314	17492	0.00309924	0.230557	2.50874	22.2828	0.00636943	CYSLTR1//LTB4R2
GO:0033599	regulation_of_mammary_gland_epithelial_cell_proliferation	Biological Process	3	17	314	17492	0.00323237	0.232611	2.49048	9.83065	0.00955414	BAX//DEAF1//IQGAP3
GO:0015909	long-chain_fatty_acid_transport	Biological Process	5	56	314	17492	0.0032628	0.232611	2.48641	4.97384	0.0159236	DRD2//PLA2G1B//PLA2G2D//SLC27A1//SLC27A5
GO:0045761	regulation_of_adenylate_cyclase_activity	Biological Process	4	35	314	17492	0.00343993	0.240234	2.46345	6.36652	0.0127389	CACNA1C//DRD2//LTB4R2//ORAI1
GO:0006873	cellular_ion_homeostasis	Biological Process	22	652	314	17492	0.00355216	0.24311	2.44951	1.87968	0.0700637	AGTR1//AVP//BAX//C7//CACNA1C//CCL19//CCR10//CIB2//CYSLTR1//DRD2//IAPP//MT1A//MT1B//MT1E//MT1F//MT1G//MT1H//MT1L//MT1X//PLA2G1B//PRNP//SCARA5
GO:0036148	phosphatidylglycerol_acyl-chain_remodeling	Biological Process	3	18	314	17492	0.00382774	0.256834	2.41706	9.2845	0.00955414	PLA2G1B//PLA2G2D//PLA2G4D
GO:0051960	regulation_of_nervous_system_development	Biological Process	28	914	314	17492	0.00417282	0.262001	2.37957	1.70656	0.089172	ADRA2C//ARHGEF15//CHRNB2//CLSTN1//CPNE6//CTSZ//DDX6//DRD2//GPC2//LRFN1//LRFN3//METRN//NEUROD2//NFATC4//NLGN2//PAX6//PITX3//PLXNA3//PRPF19//REST//SCRT2//SEMA6B//SHANK1//SOX3//TERT//TLX2//TNR//ZNF609
GO:0055082	cellular_chemical_homeostasis	Biological Process	24	745	314	17492	0.00424316	0.262001	2.37231	1.79459	0.0764331	AGTR1//AVP//BAX//C7//CACNA1C//CCL19//CCR10//CIB2//CYSLTR1//DRD2//GRIK5//IAPP//MT1A//MT1B//MT1E//MT1F//MT1G//MT1H//MT1L//MT1X//ORMDL2//PLA2G1B//PRNP//SCARA5
GO:0030858	positive_regulation_of_epithelial_cell_differentiation	Biological Process	5	60	314	17492	0.00440207	0.262001	2.35634	4.64225	0.0159236	FOXC1//GDNF//MESP1//PAX6//SFN
GO:0036149	phosphatidylinositol_acyl-chain_remodeling	Biological Process	3	19	314	17492	0.00448562	0.262001	2.34818	8.79584	0.00955414	PLA2G1B//PLA2G2D//PLA2G4D
GO:0050806	positive_regulation_of_synaptic_transmission	Biological Process	8	144	314	17492	0.0045147	0.262001	2.34537	3.09483	0.0254777	CHRNB2//CLSTN1//DRD2//NFATC4//NLGN2//SHANK1//SSH1//TNR
GO:0006104	succinyl-CoA_metabolic_process	Biological Process	2	6	314	17492	0.00459382	0.262001	2.33783	18.569	0.00636943	DLST//OGDH
GO:0009191	ribonucleoside_diphosphate_catabolic_process	Biological Process	2	6	314	17492	0.00459382	0.262001	2.33783	18.569	0.00636943	ENTPD2//NUDT18
GO:0032430	positive_regulation_of_phospholipase_A2_activity	Biological Process	2	6	314	17492	0.00459382	0.262001	2.33783	18.569	0.00636943	AGTR1//PLA2G1B
GO:0098532	histone_H3-K27_trimethylation	Biological Process	2	6	314	17492	0.00459382	0.262001	2.33783	18.569	0.00636943	HIST1H1D//HIST1H1E
GO:0055080	cation_homeostasis	Biological Process	23	709	314	17492	0.00467476	0.262246	2.33024	1.80714	0.0732484	AGTR1//AVP//BAX//C7//CACNA1C//CCL19//CCR10//CIB2//CYSLTR1//DRD2//IAPP//MT1A//MT1B//MT1E//MT1F//MT1G//MT1H//MT1L//MT1X//PLA2G1B//PRNP//SCARA5//XIAP
GO:0043524	negative_regulation_of_neuron_apoptotic_process	Biological Process	8	147	314	17492	0.00510689	0.265218	2.29184	3.03167	0.0254777	BAX//GDNF//JUN//MT1F//NFATC4//SET//SNCB//TERT
GO:0014059	regulation_of_dopamine_secretion	Biological Process	4	39	314	17492	0.00510921	0.265218	2.29165	5.71354	0.0127389	CHRNA4//CHRNB2//DRD2//GDNF
GO:0006123	mitochondrial_electron_transport,_cytochrome_c_to_oxygen	Biological Process	3	20	314	17492	0.00520781	0.265218	2.28335	8.35605	0.00955414	COX5A//COX6B1//COX8A
GO:0050768	negative_regulation_of_neurogenesis	Biological Process	12	284	314	17492	0.00541657	0.265218	2.26628	2.35382	0.0382166	CTSZ//DDX6//NFATC4//PAX6//PITX3//PLXNA3//REST//SEMA6B//SOX3//TERT//TLX2//TNR
GO:0006839	mitochondrial_transport	Biological Process	10	214	314	17492	0.00542711	0.265218	2.26543	2.60313	0.0318471	ALKBH7//BAX//CASP8//CHCHD10//PPP3R1//ROMO1//SFN//TIMM9//TOMM20//UCP3
GO:0035813	regulation_of_renal_sodium_excretion	Biological Process	3	21	314	17492	0.00599595	0.265218	2.22214	7.95814	0.00955414	AGTR1//AVP//DRD2
GO:0036150	phosphatidylserine_acyl-chain_remodeling	Biological Process	3	21	314	17492	0.00599595	0.265218	2.22214	7.95814	0.00955414	PLA2G1B//PLA2G2D//PLA2G4D
GO:0051204	protein_insertion_into_mitochondrial_membrane	Biological Process	3	21	314	17492	0.00599595	0.265218	2.22214	7.95814	0.00955414	BAX//ROMO1//TIMM9
GO:0006654	phosphatidic_acid_biosynthetic_process	Biological Process	4	41	314	17492	0.00611714	0.265218	2.21345	5.43483	0.0127389	PLA2G1B//PLA2G2D//PLA2G4D//SLC27A1
GO:0000187	activation_of_MAPK_activity	Biological Process	8	152	314	17492	0.00622379	0.265218	2.20595	2.93195	0.0254777	CCL19//DUSP9//IQGAP3//MAP3K10//MAPK11//PLA2G1B//TAOK1//UBE2V1
GO:0009134	nucleoside_diphosphate_catabolic_process	Biological Process	2	7	314	17492	0.00635531	0.265218	2.19686	15.9163	0.00636943	ENTPD2//NUDT18
GO:0009820	alkaloid_metabolic_process	Biological Process	2	7	314	17492	0.00635531	0.265218	2.19686	15.9163	0.00636943	CYP1A2//CYP3A5
GO:0015727	lactate_transport	Biological Process	2	7	314	17492	0.00635531	0.265218	2.19686	15.9163	0.00636943	SLC16A1//SLC16A8
GO:0032226	positive_regulation_of_synaptic_transmission,_dopaminergic	Biological Process	2	7	314	17492	0.00635531	0.265218	2.19686	15.9163	0.00636943	CHRNB2//DRD2
GO:0032808	lacrimal_gland_development	Biological Process	2	7	314	17492	0.00635531	0.265218	2.19686	15.9163	0.00636943	FOXC1//PAX6
GO:0033211	adiponectin-activated_signaling_pathway	Biological Process	2	7	314	17492	0.00635531	0.265218	2.19686	15.9163	0.00636943	APPL1//SLC27A1
GO:0035095	behavioral_response_to_nicotine	Biological Process	2	7	314	17492	0.00635531	0.265218	2.19686	15.9163	0.00636943	CHRNA4//CHRNB2
GO:0035873	lactate_transmembrane_transport	Biological Process	2	7	314	17492	0.00635531	0.265218	2.19686	15.9163	0.00636943	SLC16A1//SLC16A8
GO:0097107	postsynaptic_density_assembly	Biological Process	2	7	314	17492	0.00635531	0.265218	2.19686	15.9163	0.00636943	NLGN2//SHANK1
GO:1904781	positive_regulation_of_protein_localization_to_centrosome	Biological Process	2	7	314	17492	0.00635531	0.265218	2.19686	15.9163	0.00636943	MARK4//PARD6A
GO:1904798	positive_regulation_of_core_promoter_binding	Biological Process	2	7	314	17492	0.00635531	0.265218	2.19686	15.9163	0.00636943	FOXC1//PAX6
GO:0048513	animal_organ_development	Biological Process	74	3136	314	17492	0.00655297	0.270172	2.18356	1.31451	0.235669	ACIN1//AGTR1//AIRE//APH1A//ARHGEF15//ARTN//ASH1L//BAX//C12orf57//CACNA1C//CACNA1H//CASP8//CCL19//CHRNB2//COL9A1//COX6B1//CSH2//CTSZ//CYP1A2//DHH//DRD2//DSPP//EMD//FOXC1//FOXD1//FOXN2//FSCN2//GDNF//GH2//GNAO1//IFNA4//IL7R//JUN//KRT9//KRTAP1-3//KRTAP10-10//KRTAP19-1//KRTAP5-9//KRTAP8-1//LCE1F//LCE2A//LCE2C//LGR4//MAD1L1//MATN4//MDFI//MESP1//MT1G//NCAPH2//NEK8//NEUROD2//NFATC4//ORAI1//PAFAH1B3//PAX4…
GO:0046473	phosphatidic_acid_metabolic_process	Biological Process	4	42	314	17492	0.00666725	0.271611	2.17605	5.30543	0.0127389	PLA2G1B//PLA2G2D//PLA2G4D//SLC27A1
GO:0001836	release_of_cytochrome_c_from_mitochondria	Biological Process	3	22	314	17492	0.00685155	0.275835	2.16421	7.59641	0.00955414	BAX//JUN//SFN
GO:0045665	negative_regulation_of_neuron_differentiation	Biological Process	10	222	314	17492	0.00697297	0.277459	2.15658	2.50932	0.0318471	CTSZ//DDX6//NFATC4//PAX6//PLXNA3//REST//SEMA6B//SOX3//TLX2//TNR
GO:0030261	chromosome_condensation	Biological Process	4	43	314	17492	0.00724916	0.283796	2.13971	5.18205	0.0127389	ACIN1//HIST1H1D//HIST1H1E//NCAPH2
GO:0007626	locomotory_behavior	Biological Process	9	191	314	17492	0.00774083	0.283796	2.11121	2.62494	0.0286624	AVP//CHRNA4//CHRNB2//DRD2//GDNF//GNAO1//NLGN2//STRN//TNR
GO:0050890	cognition	Biological Process	12	298	314	17492	0.00783216	0.283796	2.10612	2.24324	0.0382166	C12orf57//CHRNA4//CHRNB2//DEAF1//DRD2//JUN//KCNK4//NEUROD2//NFATC4//PRNP//SHANK1//TNR
GO:0031424	keratinization	Biological Process	10	226	314	17492	0.00786392	0.283796	2.10436	2.46491	0.0318471	KRT9//KRTAP1-3//KRTAP10-10//KRTAP19-1//KRTAP5-9//KRTAP8-1//LCE1F//LCE2A//LCE2C//SFN
GO:0051584	regulation_of_dopamine_uptake_involved_in_synaptic_transmission	Biological Process	2	8	314	17492	0.00837371	0.283796	2.07708	13.9268	0.00636943	DRD2//GDNF
GO:0045333	cellular_respiration	Biological Process	8	160	314	17492	0.00838461	0.283796	2.07652	2.78535	0.0254777	COX5A//COX6B1//COX8A//CYP1A2//DLST//NDUFB10//NFATC4//OGDH
GO:0043588	skin_development	Biological Process	14	378	314	17492	0.00864849	0.283796	2.06306	2.06322	0.044586	ASH1L//KRT9//KRTAP1-3//KRTAP10-10//KRTAP19-1//KRTAP5-9//KRTAP8-1//LCE1F//LCE2A//LCE2C//LGR4//PAX6//SFN//TCF15
GO:0044062	regulation_of_excretion	Biological Process	3	24	314	17492	0.00877038	0.283796	2.05698	6.96338	0.00955414	AGTR1//AVP//DRD2
GO:0050482	arachidonic_acid_secretion	Biological Process	3	24	314	17492	0.00877038	0.283796	2.05698	6.96338	0.00955414	DRD2//PLA2G1B//PLA2G2D
GO:0050801	ion_homeostasis	Biological Process	24	792	314	17492	0.00881849	0.283796	2.05461	1.68809	0.0764331	AGTR1//AVP//BAX//C7//CACNA1C//CCL19//CCR10//CIB2//CYSLTR1//DRD2//IAPP//MT1A//MT1B//MT1E//MT1F//MT1G//MT1H//MT1L//MT1X//PLA2G1B//PRNP//SCARA5//SLC30A2//XIAP
GO:0034220	ion_transmembrane_transport	Biological Process	29	1012	314	17492	0.00882582	0.283796	2.05424	1.59635	0.0923567	BAX//BEST4//CACNA1C//CACNA1H//CCL19//CHRNA4//CHRNB2//COX5A//COX6B1//COX8A//DRD2//GJD3//GRIK5//KCNC3//KCNK4//ORAI1//SCARA5//SLC16A1//SLC16A8//SLC17A4//SLC17A5//SLC22A7//SLC26A1//SLC27A1//SLC27A5//SLC30A2//SLC5A3//SLC6A19//UCP3
GO:0015908	fatty_acid_transport	Biological Process	5	71	314	17492	0.00895129	0.283796	2.04811	3.92303	0.0159236	DRD2//PLA2G1B//PLA2G2D//SLC27A1//SLC27A5
GO:0019725	cellular_homeostasis	Biological Process	26	881	314	17492	0.00904671	0.283796	2.04351	1.64402	0.0828025	AGTR1//AVP//BAX//C7//CACNA1C//CCL19//CCR10//CIB2//CYSLTR1//DRD2//GRIK5//IAPP//MT1A//MT1B//MT1E//MT1F//MT1G//MT1H//MT1L//MT1X//ORMDL2//PLA2G1B//PRNP//SCARA5//TAOK1//UBE2C
GO:0030216	keratinocyte_differentiation	Biological Process	11	268	314	17492	0.00933121	0.283796	2.03006	2.28648	0.0350318	KRT9//KRTAP1-3//KRTAP10-10//KRTAP19-1//KRTAP5-9//KRTAP8-1//LCE1F//LCE2A//LCE2C//PAX6//SFN
GO:0035640	exploration_behavior	Biological Process	3	25	314	17492	0.00983589	0.283796	2.00719	6.68484	0.00955414	CHRNA4//NLGN2//TNR
GO:2000311	regulation_of_AMPA_receptor_activity	Biological Process	3	25	314	17492	0.00983589	0.283796	2.00719	6.68484	0.00955414	CNIH2//NLGN2//SHANK1
GO:0043954	cellular_component_maintenance	Biological Process	4	47	314	17492	0.00990911	0.283796	2.00397	4.74102	0.0127389	CHCHD10//NLGN2//PARD6A//PRNP
GO:0006811	ion_transport	Biological Process	36	1344	314	17492	0.0103191	0.283796	1.98636	1.49215	0.11465	BAX//BEST4//CA5A//CACNA1C//CACNA1H//CCL19//CHRNA4//CHRNB2//COX5A//COX6B1//COX8A//CYSLTR1//DRD2//FXYD5//GJD3//GRIK5//KCNC3//KCNK4//MAPK15//ORAI1//PLA2G1B//PLA2G2D//PRELID2//SCARA5//SLC16A1//SLC16A8//SLC17A4//SLC17A5//SLC22A7//SLC26A1//SLC27A1//SLC27A5//SLC30A2//SLC5A3//SLC6A19//UCP3
GO:0021536	diencephalon_development	Biological Process	5	74	314	17492	0.0106064	0.283796	1.97443	3.76399	0.0159236	BAX//CHRNB2//DRD2//PAX6//SOX3
GO:0006575	cellular_modified_amino_acid_metabolic_process	Biological Process	9	201	314	17492	0.0106105	0.283796	1.97426	2.49434	0.0286624	CHAC1//GGT5//GPX4//GSTM5//PLA2G1B//PLA2G2D//PLA2G4D//SARDH//SLC27A1
GO:0006198	cAMP_catabolic_process	Biological Process	2	9	314	17492	0.0106393	0.283796	1.97309	12.3793	0.00636943	PDE4C//PDE7A
GO:0044539	long-chain_fatty_acid_import_into_cell	Biological Process	2	9	314	17492	0.0106393	0.283796	1.97309	12.3793	0.00636943	SLC27A1//SLC27A5
GO:0045762	positive_regulation_of_adenylate_cyclase_activity	Biological Process	2	9	314	17492	0.0106393	0.283796	1.97309	12.3793	0.00636943	CACNA1C//ORAI1
GO:0098698	postsynaptic_specialization_assembly	Biological Process	2	9	314	17492	0.0106393	0.283796	1.97309	12.3793	0.00636943	NLGN2//SHANK1
GO:0001523	retinoid_metabolic_process	Biological Process	6	103	314	17492	0.0106623	0.283796	1.97215	3.24507	0.0191083	APOM//CYP1A2//CYP3A5//GPC1//GPC2//RHO
GO:0006935	chemotaxis	Biological Process	18	550	314	17492	0.0107548	0.283796	1.9684	1.82314	0.0573248	AGTR1//ALCAM//ARTN//CCL19//CCL24//CCR10//CYSLTR1//FOXD1//GDNF//GPC1//HSD3B7//LTB4R2//PAX6//PLA2G1B//PLXNA3//SEMA6B//TMEFF2//TNR
GO:0050808	synapse_organization	Biological Process	11	274	314	17492	0.0108923	0.283796	1.96288	2.23641	0.0350318	CHCHD10//DRD2//GDNF//LRFN3//NLGN2//PRNP//REST//SHANK1//SNCB//TMEFF2//TNR
GO:0036152	phosphatidylethanolamine_acyl-chain_remodeling	Biological Process	3	26	314	17492	0.0109734	0.283796	1.95966	6.42773	0.00955414	PLA2G1B//PLA2G2D//PLA2G4D
GO:0051968	positive_regulation_of_synaptic_transmission,_glutamatergic	Biological Process	3	26	314	17492	0.0109734	0.283796	1.95966	6.42773	0.00955414	NLGN2//SHANK1//TNR
GO:1900740	positive_regulation_of_protein_insertion_into_mitochondrial_membrane_involved_in_apoptotic_signaling_pathway	Biological Process	3	26	314	17492	0.0109734	0.283796	1.95966	6.42773	0.00955414	CASP8//PPP3R1//SFN
GO:0051403	stress-activated_MAPK_cascade	Biological Process	6	104	314	17492	0.0111496	0.283796	1.95274	3.21387	0.0191083	CCL19//DUSP9//MAP3K10//MAPK11//TAOK1//UBE2V1
GO:0019233	sensory_perception_of_pain	Biological Process	5	75	314	17492	0.0112016	0.283796	1.95072	3.7138	0.0159236	CHRNA4//CHRNB2//IAPP//KCNK4//NLGN2
GO:0031644	regulation_of_nervous_system_process	Biological Process	7	136	314	17492	0.0114712	0.283796	1.94039	2.86727	0.022293	ADRA2C//AVP//CNIH2//NLGN2//SHANK1//SSH1//TNR
GO:0046470	phosphatidylcholine_metabolic_process	Biological Process	5	76	314	17492	0.0118192	0.283796	1.92741	3.66493	0.0159236	CHAT//PLA2G1B//PLA2G2D//PLA2G4D//SLC27A1
GO:0016477	cell_migration	Biological Process	27	947	314	17492	0.012055	0.283796	1.91883	1.58827	0.0859873	AGTR1//ARTN//BAX//CCL19//CCL24//CCR10//DRD2//FOXC1//FSCN2//GDNF//GOLPH3//GPC1//GPC2//HSD3B7//LTB4R2//MESP1//PAK4//PAX6//PLA2G1B//SEMA6B//SLC16A1//SLC16A8//SPATA13//SPEF1//TMEFF2//TMEM201//TNR
GO:0036151	phosphatidylcholine_acyl-chain_remodeling	Biological Process	3	27	314	17492	0.0121838	0.283796	1.91422	6.18967	0.00955414	PLA2G1B//PLA2G2D//PLA2G4D
GO:1901215	negative_regulation_of_neuron_death	Biological Process	9	206	314	17492	0.0123146	0.283796	1.90958	2.4338	0.0286624	BAX//GDNF//JUN//MT1F//NFATC4//REST//SET//SNCB//TERT
GO:0010033	response_to_organic_substance	Biological Process	69	2973	314	17492	0.0127365	0.283796	1.89495	1.2929	0.219745	AANAT//ADAMTS7//AGTR1//AHR//APOM//APPL1//AQP8//ATF6B//AVP//BAX//CACNA1H//CASP8//CCL19//CCL24//CCR10//CHAC1//CHRNA4//CHRNB2//CIB2//COL4A2//CSH2//CYP1A2//DAPK3//DHH//DRD2//EMD//FOXC1//GBP6//GDF1//GGT5//GH2//GJD3//GNAO1//GPHB5//GPX4//GRIK5//HMHB1//IFNA4//IL7R//IQGAP3//JUN//KCNK4//LGR4//MAFA//MAPK11//MT1G//MT1X//MTF2//NFATC4//PAK4//PARD6A//PAX6//PAX9//PITX3//PLA2G1B//PMEPA1//PRNP//PSPH//REST//SEL1L//…
GO:0031279	regulation_of_cyclase_activity	Biological Process	4	51	314	17492	0.0131324	0.283796	1.88166	4.36918	0.0127389	CACNA1C//DRD2//LTB4R2//ORAI1
GO:0035094	response_to_nicotine	Biological Process	4	51	314	17492	0.0131324	0.283796	1.88166	4.36918	0.0127389	AVP//CHRNA4//CHRNB2//DRD2
GO:0055085	transmembrane_transport	Biological Process	35	1320	314	17492	0.0131391	0.283796	1.88143	1.47708	0.111465	AQP8//BAX//BEST4//CACNA1C//CACNA1H//CCL19//CD320//CHRNA4//CHRNB2//COX5A//COX6B1//COX8A//DRD2//GJD3//GRIK5//KCNC3//KCNK4//ORAI1//ROMO1//SCARA5//SEL1L//SLC16A1//SLC16A8//SLC17A4//SLC17A5//SLC22A7//SLC26A1//SLC27A1//SLC27A5//SLC30A2//SLC5A3//SLC6A19//TOMM20//UCP3//ZFAND2B
GO:0006751	glutathione_catabolic_process	Biological Process	2	10	314	17492	0.0131426	0.283796	1.88132	11.1414	0.00636943	CHAC1//GGT5
GO:0030432	peristalsis	Biological Process	2	10	314	17492	0.0131426	0.283796	1.88132	11.1414	0.00636943	DRD2//GDNF
GO:0045657	positive_regulation_of_monocyte_differentiation	Biological Process	2	10	314	17492	0.0131426	0.283796	1.88132	11.1414	0.00636943	ACIN1//JUN
GO:1904779	regulation_of_protein_localization_to_centrosome	Biological Process	2	10	314	17492	0.0131426	0.283796	1.88132	11.1414	0.00636943	MARK4//PARD6A
GO:0050905	neuromuscular_process	Biological Process	6	108	314	17492	0.0132566	0.283796	1.87757	3.09483	0.0191083	DRD2//FOXS1//NLGN2//SHANK1//TCF15//TNR
GO:0015718	monocarboxylic_acid_transport	Biological Process	7	140	314	17492	0.0132954	0.283796	1.8763	2.78535	0.022293	DRD2//PLA2G1B//PLA2G2D//SLC16A1//SLC16A8//SLC27A1//SLC27A5
GO:0097300	programmed_necrotic_cell_death	Biological Process	3	28	314	17492	0.0134678	0.283796	1.8707	5.96861	0.00955414	ALKBH7//BAX//IPMK
GO:2000463	positive_regulation_of_excitatory_postsynaptic_potential	Biological Process	3	28	314	17492	0.0134678	0.283796	1.8707	5.96861	0.00955414	NLGN2//SHANK1//SSH1
GO:0016101	diterpenoid_metabolic_process	Biological Process	6	109	314	17492	0.013824	0.283796	1.85937	3.06644	0.0191083	APOM//CYP1A2//CYP3A5//GPC1//GPC2//RHO
GO:0031098	stress-activated_protein_kinase_signaling_cascade	Biological Process	6	109	314	17492	0.013824	0.283796	1.85937	3.06644	0.0191083	CCL19//DUSP9//MAP3K10//MAPK11//TAOK1//UBE2V1
GO:0009060	aerobic_respiration	Biological Process	5	80	314	17492	0.0145205	0.283796	1.83802	3.48169	0.0159236	COX5A//COX6B1//COX8A//DLST//OGDH
GO:0050885	neuromuscular_process_controlling_balance	Biological Process	4	53	314	17492	0.014967	0.283796	1.82487	4.2043	0.0127389	FOXS1//NLGN2//SHANK1//TNR
GO:2000179	positive_regulation_of_neural_precursor_cell_proliferation	Biological Process	4	53	314	17492	0.014967	0.283796	1.82487	4.2043	0.0127389	CTSZ//DRD2//PAX6//PITX3
GO:0010721	negative_regulation_of_cell_development	Biological Process	12	326	314	17492	0.0151343	0.283796	1.82004	2.05056	0.0382166	CTSZ//DDX6//NFATC4//PAX6//PITX3//PLXNA3//REST//SEMA6B//SOX3//TERT//TLX2//TNR
GO:0007254	JNK_cascade	Biological Process	5	81	314	17492	0.0152553	0.283796	1.81658	3.4387	0.0159236	CCL19//DUSP9//MAP3K10//TAOK1//UBE2V1
GO:0048870	cell_motility	Biological Process	29	1058	314	17492	0.0154798	0.283796	1.81024	1.52694	0.0923567	AGTR1//ARTN//ASH1L//BAX//CCL19//CCL24//CCR10//DRD2//FOXC1//FSCN2//GDNF//GOLPH3//GPC1//GPC2//HSD3B7//LTB4R2//MESP1//PAK4//PAX6//PLA2G1B//SEMA6B//SLC16A1//SLC16A8//SMCP//SPATA13//SPEF1//TMEFF2//TMEM201//TNR
GO:0007612	learning	Biological Process	7	145	314	17492	0.0158574	0.283796	1.79977	2.6893	0.022293	CHRNB2//DEAF1//DRD2//JUN//NEUROD2//SHANK1//TNR
GO:0009950	dorsal|ventral_axis_specification	Biological Process	2	11	314	17492	0.0158744	0.283796	1.7993	10.1285	0.00636943	MDFI//PAX6
GO:0031915	positive_regulation_of_synaptic_plasticity	Biological Process	2	11	314	17492	0.0158744	0.283796	1.7993	10.1285	0.00636943	NEUROD2//SSH1
GO:0045039	protein_insertion_into_mitochondrial_inner_membrane	Biological Process	2	11	314	17492	0.0158744	0.283796	1.7993	10.1285	0.00636943	ROMO1//TIMM9
GO:0060368	regulation_of_Fc_receptor_mediated_stimulatory_signaling_pathway	Biological Process	2	11	314	17492	0.0158744	0.283796	1.7993	10.1285	0.00636943	APPL1//CD226
GO:0060394	negative_regulation_of_pathway-restricted_SMAD_protein_phosphorylation	Biological Process	2	11	314	17492	0.0158744	0.283796	1.7993	10.1285	0.00636943	PBLD//PMEPA1
GO:0070734	histone_H3-K27_methylation	Biological Process	2	11	314	17492	0.0158744	0.283796	1.7993	10.1285	0.00636943	HIST1H1D//HIST1H1E
GO:2001269	positive_regulation_of_cysteine-type_endopeptidase_activity_involved_in_apoptotic_signaling_pathway	Biological Process	2	11	314	17492	0.0158744	0.283796	1.7993	10.1285	0.00636943	BAX//CASP8
GO:0042219	cellular_modified_amino_acid_catabolic_process	Biological Process	3	30	314	17492	0.0162586	0.283796	1.78892	5.5707	0.00955414	CHAC1//GGT5//SARDH
GO:0070265	necrotic_cell_death	Biological Process	3	30	314	17492	0.0162586	0.283796	1.78892	5.5707	0.00955414	ALKBH7//BAX//IPMK
GO:0019933	cAMP-mediated_signaling	Biological Process	7	146	314	17492	0.0164091	0.283796	1.78492	2.67088	0.022293	ADRA2C//AHR//DRD2//GPHB5//GPR78//IAPP//LGR4
GO:0048878	chemical_homeostasis	Biological Process	30	1110	314	17492	0.0166034	0.283796	1.7798	1.50559	0.0955414	AGTR1//APOM//AVP//BAX//C7//CACNA1C//CCL19//CCR10//CIB2//CYSLTR1//DRD2//GRIK5//IAPP//MT1A//MT1B//MT1E//MT1F//MT1G//MT1H//MT1L//MT1X//ORMDL2//PAX6//PLA2G1B//PRNP//SCARA5//SFN//SLC16A1//SLC30A2//XIAP
GO:0007204	positive_regulation_of_cytosolic_calcium_ion_concentration	Biological Process	11	292	314	17492	0.0167897	0.283796	1.77496	2.09855	0.0350318	AGTR1//AVP//BAX//CACNA1C//CCL19//CCR10//CIB2//CYSLTR1//DRD2//IAPP//PLA2G1B
GO:0071310	cellular_response_to_organic_substance	Biological Process	56	2362	314	17492	0.017048	0.283796	1.76833	1.32074	0.178344	AANAT//ADAMTS7//AGTR1//AHR//APPL1//AQP8//ATF6B//BAX//CACNA1H//CASP8//CCL19//CCL24//CCR10//CHRNA4//CHRNB2//CIB2//COL4A2//CSH2//DAPK3//DRD2//EMD//FOXC1//GBP6//GDF1//GH2//GNAO1//GPHB5//GRIK5//HMHB1//IFNA4//IL7R//IQGAP3//JUN//KCNK4//LGR4//MAPK11//MT1G//MT1X//MTF2//NFATC4//PAK4//PARD6A//PAX6//PAX9//PITX3//PLA2G1B//PMEPA1//PRNP//REST//SLC16A1//SLC27A1//SMARCD1//SSH1//TNFRSF4//UBE2V1//UCP3
GO:0010821	regulation_of_mitochondrion_organization	Biological Process	8	183	314	17492	0.0177198	0.283796	1.75154	2.43528	0.0254777	AVP//BAX//CASP8//CHCHD10//GOLPH3//IAPP//PPP3R1//SFN
GO:0051353	positive_regulation_of_oxidoreductase_activity	Biological Process	4	56	314	17492	0.018009	0.283796	1.74451	3.97907	0.0127389	AGTR1//CHCHD10//GDNF//TERT
GO:0070542	response_to_fatty_acid	Biological Process	5	85	314	17492	0.0184421	0.283796	1.73419	3.27688	0.0159236	AANAT//CCL19//KCNK4//NFATC4//SMARCD1
GO:0007611	learning_or_memory	Biological Process	10	258	314	17492	0.0184933	0.283796	1.73298	2.15919	0.0318471	CHRNB2//DEAF1//DRD2//JUN//KCNK4//NEUROD2//NFATC4//PRNP//SHANK1//TNR
GO:0006554	lysine_catabolic_process	Biological Process	2	12	314	17492	0.0188257	0.283796	1.72525	9.2845	0.00636943	DLST//OGDH
GO:0032429	regulation_of_phospholipase_A2_activity	Biological Process	2	12	314	17492	0.0188257	0.283796	1.72525	9.2845	0.00636943	AGTR1//PLA2G1B
GO:0033173	calcineurin-NFAT_signaling_cascade	Biological Process	2	12	314	17492	0.0188257	0.283796	1.72525	9.2845	0.00636943	NFATC4//PPP3R1
GO:0033605	positive_regulation_of_catecholamine_secretion	Biological Process	2	12	314	17492	0.0188257	0.283796	1.72525	9.2845	0.00636943	CHRNB2//GDNF
GO:0035641	locomotory_exploration_behavior	Biological Process	2	12	314	17492	0.0188257	0.283796	1.72525	9.2845	0.00636943	NLGN2//TNR
GO:0045217	cell-cell_junction_maintenance	Biological Process	2	12	314	17492	0.0188257	0.283796	1.72525	9.2845	0.00636943	NLGN2//PARD6A
GO:0048484	enteric_nervous_system_development	Biological Process	2	12	314	17492	0.0188257	0.283796	1.72525	9.2845	0.00636943	GDNF//TLX2
GO:0071257	cellular_response_to_electrical_stimulus	Biological Process	2	12	314	17492	0.0188257	0.283796	1.72525	9.2845	0.00636943	NEUROD2//REST
GO:0006749	glutathione_metabolic_process	Biological Process	4	57	314	17492	0.0191022	0.286637	1.71892	3.90926	0.0127389	CHAC1//GGT5//GPX4//GSTM5
GO:0009154	purine_ribonucleotide_catabolic_process	Biological Process	3	32	314	17492	0.0193493	0.286637	1.71334	5.22253	0.00955414	NUDT18//PDE4C//PDE7A
GO:0043278	response_to_morphine	Biological Process	3	32	314	17492	0.0193493	0.286637	1.71334	5.22253	0.00955414	DRD2//GNAO1//PITX3
GO:0072210	metanephric_nephron_development	Biological Process	3	32	314	17492	0.0193493	0.286637	1.71334	5.22253	0.00955414	FOXD1//GDNF//LGR4
GO:0050767	regulation_of_neurogenesis	Biological Process	23	809	314	17492	0.0202953	0.299356	1.6926	1.58376	0.0732484	ADRA2C//CHRNB2//CPNE6//CTSZ//DDX6//DRD2//GPC2//METRN//NEUROD2//NFATC4//PAX6//PITX3//PLXNA3//PRPF19//REST//SCRT2//SEMA6B//SHANK1//SOX3//TERT//TLX2//TNR//ZNF609
GO:1905475	regulation_of_protein_localization_to_membrane	Biological Process	8	188	314	17492	0.02047	0.300637	1.68888	2.37051	0.0254777	APPL1//CASP8//GPC1//GPC2//PPP3R1//PRNP//SFN//SSH1
GO:0014070	response_to_organic_cyclic_compound	Biological Process	25	902	314	17492	0.0210377	0.307655	1.677	1.54399	0.0796178	AANAT//AHR//AQP8//AVP//CASP8//CHRNB2//CIB2//CYP1A2//DHH//DRD2//GGT5//GNAO1//GPX4//IFNA4//JUN//NFATC4//PAK4//PITX3//PMEPA1//PSPH//REST//SLC16A1//SSH1//TOMM20//UCP3
GO:0007613	memory	Biological Process	6	120	314	17492	0.0212197	0.308995	1.67326	2.78535	0.0191083	CHRNB2//DRD2//KCNK4//NFATC4//PRNP//SHANK1
GO:0009725	response_to_hormone	Biological Process	25	904	314	17492	0.0215463	0.312422	1.66663	1.54057	0.0796178	AANAT//AGTR1//APPL1//AVP//CACNA1H//CASP8//CCL19//CHRNA4//CHRNB2//CSH2//CYP1A2//DHH//GGT5//GH2//GPHB5//GPX4//JUN//LGR4//PLA2G1B//PMEPA1//PSPH//REST//SLC27A1//TOMM20//UCP3
GO:0022008	neurogenesis	Biological Process	40	1612	314	17492	0.0223818	0.323167	1.6501	1.38231	0.127389	ADRA2C//ALCAM//ARTN//BAX//C12orf57//CHAC1//CHRNB2//CPNE6//CTSZ//DAPK3//DDX6//DRD2//FOXD1//FSCN2//GDNF//GNAO1//GPC1//GPC2//JUN//MESP1//METRN//NEUROD2//NFATC4//PAK4//PAX6//PITX3//PLXNA3//PRDM8//PRPF19//REST//SCRT2//SEMA6B//SHANK1//SOX3//STRN//TERT//TLX2//TMEFF2//TNR//ZNF609
GO:0007274	neuromuscular_synaptic_transmission	Biological Process	3	34	314	17492	0.0227417	0.326983	1.64318	4.91532	0.00955414	CHAT//CHRNA4//CHRNB2
GO:0030888	regulation_of_B_cell_proliferation	Biological Process	4	61	314	17492	0.0238803	0.341918	1.62196	3.65292	0.0127389	AHR//CD320//CHRNB2//TNFRSF4
GO:0009913	epidermal_cell_differentiation	Biological Process	11	309	314	17492	0.0242971	0.345226	1.61445	1.9831	0.0350318	KRT9//KRTAP1-3//KRTAP10-10//KRTAP19-1//KRTAP5-9//KRTAP8-1//LCE1F//LCE2A//LCE2C//PAX6//SFN
GO:0007219	Notch_signaling_pathway	Biological Process	6	124	314	17492	0.024467	0.345226	1.61142	2.6955	0.0191083	APH1A//CHAC1//FOXC1//MESP1//PRNP//SEL1L
GO:0032787	monocarboxylic_acid_metabolic_process	Biological Process	16	516	314	17492	0.0245274	0.345226	1.61035	1.72735	0.0509554	ACBD5//ALKBH7//CYP1A2//CYP2B6//CYP3A5//GGT5//GPX4//HSD3B7//OGDH//PLA2G1B//PLA2G4D//SLC16A1//SLC16A8//SLC27A1//SLC27A5//UCP3
GO:0008045	motor_neuron_axon_guidance	Biological Process	3	35	314	17492	0.0245512	0.345226	1.60993	4.77489	0.00955414	ALCAM//PLXNA3//TMEFF2
GO:0042110	T_cell_activation	Biological Process	9	232	314	17492	0.0246157	0.345226	1.60879	2.16105	0.0286624	AIRE//BAX//CASP8//CCL19//IFNA4//IL7R//NCAPH2//PLA2G2D//TNFRSF4
GO:0007625	grooming_behavior	Biological Process	2	14	314	17492	0.0253525	0.347025	1.59598	7.95814	0.00636943	AVP//DRD2
GO:0009214	cyclic_nucleotide_catabolic_process	Biological Process	2	14	314	17492	0.0253525	0.347025	1.59598	7.95814	0.00636943	PDE4C//PDE7A
GO:0014854	response_to_inactivity	Biological Process	2	14	314	17492	0.0253525	0.347025	1.59598	7.95814	0.00636943	DRD2//SGCA
GO:0033604	negative_regulation_of_catecholamine_secretion	Biological Process	2	14	314	17492	0.0253525	0.347025	1.59598	7.95814	0.00636943	ADRA2C//DRD2
GO:0043922	negative_regulation_by_host_of_viral_transcription	Biological Process	2	14	314	17492	0.0253525	0.347025	1.59598	7.95814	0.00636943	JUN//REST
GO:1904861	excitatory_synapse_assembly	Biological Process	2	14	314	17492	0.0253525	0.347025	1.59598	7.95814	0.00636943	NLGN2//SHANK1
GO:0032880	regulation_of_protein_localization	Biological Process	27	1011	314	17492	0.0256616	0.349857	1.59072	1.48772	0.0859873	ADRA2C//APPL1//ASTN2//CACNA1C//CASP8//CCL19//CNIH2//DRD2//EMD//GOLPH3//GPC1//GPC2//HMHB1//LGR4//MAPK11//MARK4//NLGN2//PARD6A//PLA2G1B//PPP3R1//PRNP//REST//SFN//SLC16A1//SSH1//TERT//TNFRSF4
GO:0006631	fatty_acid_metabolic_process	Biological Process	11	312	314	17492	0.0258414	0.350909	1.58768	1.96403	0.0350318	ACBD5//ALKBH7//CYP1A2//CYP2B6//GGT5//GPX4//PLA2G1B//PLA2G4D//SLC27A1//SLC27A5//UCP3
GO:0070830	bicellular_tight_junction_assembly	Biological Process	3	36	314	17492	0.0264362	0.355847	1.5778	4.64225	0.00955414	MPP7//PARD6A//STRN
GO:0035418	protein_localization_to_synapse	Biological Process	4	63	314	17492	0.026517	0.355847	1.57648	3.53695	0.0127389	CLSTN1//NLGN2//SHANK1//SYNJ2BP
GO:1900449	regulation_of_glutamate_receptor_signaling_pathway	Biological Process	4	63	314	17492	0.026517	0.355847	1.57648	3.53695	0.0127389	CNIH2//NLGN2//PRNP//SHANK1
GO:0007189	adenylate_cyclase-activating_G_protein-coupled_receptor_signaling_pathway	Biological Process	6	127	314	17492	0.0271098	0.361766	1.56687	2.63183	0.0191083	ADRA2C//DRD2//GPHB5//GPR78//IAPP//LGR4
GO:0019722	calcium-mediated_signaling	Biological Process	7	162	314	17492	0.0271694	0.361766	1.56592	2.40709	0.022293	AGTR1//CACNA1C//CCR10//NFATC4//PPP3R1//PRNP//RCAN3
GO:0042326	negative_regulation_of_phosphorylation	Biological Process	14	438	314	17492	0.0273294	0.362486	1.56337	1.78059	0.044586	ASH1L//BAX//DRD2//DUSP9//JUN//MYCNOS//PARD6A//PAX6//PBLD//PMEPA1//PRNP//SFN//SYNJ2BP//VPS25
GO:0060079	excitatory_postsynaptic_potential	Biological Process	4	64	314	17492	0.0278981	0.364291	1.55443	3.48169	0.0127389	CHRNA4//CHRNB2//DRD2//GRIK5
GO:0051205	protein_insertion_into_membrane	Biological Process	3	37	314	17492	0.0283966	0.364291	1.54673	4.51678	0.00955414	BAX//ROMO1//TIMM9
GO:0051568	histone_H3-K4_methylation	Biological Process	3	37	314	17492	0.0283966	0.364291	1.54673	4.51678	0.00955414	ASH1L//HIST1H1D//HIST1H1E
GO:0006750	glutathione_biosynthetic_process	Biological Process	2	15	314	17492	0.0289111	0.364291	1.53893	7.4276	0.00636943	CHAC1//GGT5
GO:0097720	calcineurin-mediated_signaling	Biological Process	2	15	314	17492	0.0289111	0.364291	1.53893	7.4276	0.00636943	NFATC4//PPP3R1
GO:0001933	negative_regulation_of_protein_phosphorylation	Biological Process	13	400	314	17492	0.0291658	0.364291	1.53513	1.81048	0.0414013	ASH1L//BAX//DRD2//DUSP9//JUN//PARD6A//PAX6//PBLD//PMEPA1//PRNP//SFN//SYNJ2BP//VPS25
GO:0050804	modulation_of_chemical_synaptic_transmission	Biological Process	14	443	314	17492	0.0296894	0.364291	1.5274	1.76049	0.044586	CHRNA4//CHRNB2//CLSTN1//CNIH2//DRD2//GDNF//GRIK5//NEUROD2//NFATC4//NLGN2//PRNP//SHANK1//SSH1//TNR
GO:0032147	activation_of_protein_kinase_activity	Biological Process	12	361	314	17492	0.0304307	0.364291	1.51669	1.85176	0.0382166	ADRA2C//CCL19//DRD2//DUSP9//IQGAP3//MAP3K10//MAPK11//PAK4//PLA2G1B//PRNP//TAOK1//UBE2V1
GO:0007257	activation_of_JUN_kinase_activity	Biological Process	3	38	314	17492	0.030432	0.364291	1.51667	4.39792	0.00955414	CCL19//MAP3K10//TAOK1
GO:0007163	establishment_or_maintenance_of_cell_polarity	Biological Process	8	203	314	17492	0.0305198	0.364291	1.51542	2.19535	0.0254777	CCL19//FSCN2//GOLPH3//MPP7//PARD6A//PAX6//SYNJ2BP//TCF15
GO:0044255	cellular_lipid_metabolic_process	Biological Process	25	939	314	17492	0.0320991	0.364291	1.49351	1.48315	0.0796178	ACBD5//ALKBH7//APOM//BAX//CHAT//CPNE6//CPNE7//CYP1A2//CYP2B6//CYP3A5//GGT5//GPC1//GPC2//GPX4//IPMK//MOGAT3//ORMDL2//PLA2G1B//PLA2G2D//PLA2G4D//RHO//SEL1L//SLC27A1//SLC27A5//UCP3
GO:0046942	carboxylic_acid_transport	Biological Process	10	283	314	17492	0.0322659	0.364291	1.49126	1.96845	0.0318471	DRD2//PLA2G1B//PLA2G2D//SLC16A1//SLC16A8//SLC17A5//SLC26A1//SLC27A1//SLC27A5//SLC6A19
GO:0070613	regulation_of_protein_processing	Biological Process	4	67	314	17492	0.0322952	0.364291	1.49086	3.32579	0.0127389	CHAC1//CTSZ//PRNP//XIAP
GO:0120193	tight_junction_organization	Biological Process	3	39	314	17492	0.0325423	0.364291	1.48755	4.28515	0.00955414	MPP7//PARD6A//STRN
GO:0006103	2-oxoglutarate_metabolic_process	Biological Process	2	16	314	17492	0.032656	0.364291	1.48604	6.96338	0.00636943	DLST//OGDH
GO:0007158	neuron_cell-cell_adhesion	Biological Process	2	16	314	17492	0.032656	0.364291	1.48604	6.96338	0.00636943	NLGN2//TNR
GO:0034331	cell_junction_maintenance	Biological Process	2	16	314	17492	0.032656	0.364291	1.48604	6.96338	0.00636943	NLGN2//PARD6A
GO:0050774	negative_regulation_of_dendrite_morphogenesis	Biological Process	2	16	314	17492	0.032656	0.364291	1.48604	6.96338	0.00636943	NFATC4//TLX2
GO:0060231	mesenchymal_to_epithelial_transition	Biological Process	2	16	314	17492	0.032656	0.364291	1.48604	6.96338	0.00636943	GDNF//TCF15
GO:0080182	histone_H3-K4_trimethylation	Biological Process	2	16	314	17492	0.032656	0.364291	1.48604	6.96338	0.00636943	HIST1H1D//HIST1H1E
GO:0086064	cell_communication_by_electrical_coupling_involved_in_cardiac_conduction	Biological Process	2	16	314	17492	0.032656	0.364291	1.48604	6.96338	0.00636943	CACNA1C//GJD3
GO:0090151	establishment_of_protein_localization_to_mitochondrial_membrane	Biological Process	2	16	314	17492	0.032656	0.364291	1.48604	6.96338	0.00636943	ROMO1//TIMM9
GO:1904754	positive_regulation_of_vascular_associated_smooth_muscle_cell_migration	Biological Process	2	16	314	17492	0.032656	0.364291	1.48604	6.96338	0.00636943	SSH1//TERT
GO:0072676	lymphocyte_migration	Biological Process	4	68	314	17492	0.0338459	0.364291	1.47049	3.27688	0.0127389	ARTN//CCL19//CCL24//HSD3B7
GO:0048699	generation_of_neurons	Biological Process	37	1515	314	17492	0.0339626	0.364291	1.469	1.3605	0.117834	ADRA2C//ALCAM//ARTN//BAX//C12orf57//CHRNB2//CPNE6//CTSZ//DAPK3//DDX6//DRD2//FOXD1//FSCN2//GDNF//GNAO1//GPC1//GPC2//JUN//METRN//NEUROD2//NFATC4//PAK4//PAX6//PITX3//PLXNA3//PRPF19//REST//SCRT2//SEMA6B//SHANK1//SOX3//STRN//TERT//TLX2//TMEFF2//TNR//ZNF609
GO:0006936	muscle_contraction	Biological Process	9	246	314	17492	0.0340193	0.364291	1.46828	2.03806	0.0286624	CACNA1C//CACNA1H//CHRNB2//DRD2//EMD//GDNF//GNAO1//SGCA//TNNI2
GO:0019935	cyclic-nucleotide-mediated_signaling	Biological Process	7	170	314	17492	0.034026	0.364291	1.46819	2.29382	0.022293	ADRA2C//AHR//DRD2//GPHB5//GPR78//IAPP//LGR4
GO:0061564	axon_development	Biological Process	13	410	314	17492	0.0345618	0.364291	1.4614	1.76632	0.0414013	ALCAM//ARTN//C12orf57//CHRNB2//DRD2//FOXD1//GDNF//GPC1//JUN//PAX6//PLXNA3//TMEFF2//TNR
GO:0090184	positive_regulation_of_kidney_development	Biological Process	3	40	314	17492	0.0347269	0.364291	1.45933	4.17803	0.00955414	FOXD1//GDNF//LGR4
GO:0016584	nucleosome_positioning	Biological Process	2	17	314	17492	0.0365791	0.364291	1.43677	6.55377	0.00636943	HIST1H1D//HIST1H1E
GO:0030224	monocyte_differentiation	Biological Process	2	17	314	17492	0.0365791	0.364291	1.43677	6.55377	0.00636943	JUN//MT1G
GO:0030322	stabilization_of_membrane_potential	Biological Process	2	17	314	17492	0.0365791	0.364291	1.43677	6.55377	0.00636943	CHCHD10//KCNK4
GO:0045187	regulation_of_circadian_sleep|wake_cycle,_sleep	Biological Process	2	17	314	17492	0.0365791	0.364291	1.43677	6.55377	0.00636943	CHRNB2//DRD2
GO:0051969	regulation_of_transmission_of_nerve_impulse	Biological Process	2	17	314	17492	0.0365791	0.364291	1.43677	6.55377	0.00636943	AVP//TNR
GO:0055070	copper_ion_homeostasis	Biological Process	2	17	314	17492	0.0365791	0.364291	1.43677	6.55377	0.00636943	PRNP//XIAP
GO:0097106	postsynaptic_density_organization	Biological Process	2	17	314	17492	0.0365791	0.364291	1.43677	6.55377	0.00636943	NLGN2//SHANK1
GO:0009887	animal_organ_morphogenesis	Biological Process	25	952	314	17492	0.0368885	0.364291	1.43311	1.46289	0.0796178	ASH1L//BAX//C12orf57//COL9A1//CTSZ//DSPP//FOXC1//FOXD1//FSCN2//GDNF//GNAO1//JUN//LGR4//MATN4//MDFI//MESP1//NEK8//PAX4//PAX6//PAX9//PITX3//SHANK1//STX2//TCF15//TMEFF2
GO:0030517	negative_regulation_of_axon_extension	Biological Process	3	41	314	17492	0.0369856	0.364291	1.43197	4.07612	0.00955414	PLXNA3//SEMA6B//TNR
GO:0030890	positive_regulation_of_B_cell_proliferation	Biological Process	3	41	314	17492	0.0369856	0.364291	1.43197	4.07612	0.00955414	CD320//CHRNB2//TNFRSF4
GO:0042100	B_cell_proliferation	Biological Process	3	41	314	17492	0.0369856	0.364291	1.43197	4.07612	0.00955414	BAX//IFNA4//IL7R
GO:0098815	modulation_of_excitatory_postsynaptic_potential	Biological Process	3	41	314	17492	0.0369856	0.364291	1.43197	4.07612	0.00955414	NLGN2//SHANK1//SSH1
GO:1902893	regulation_of_pri-miRNA_transcription_by_RNA_polymerase_II	Biological Process	3	41	314	17492	0.0369856	0.364291	1.43197	4.07612	0.00955414	JUN//NFATC4//TERT
GO:2000648	positive_regulation_of_stem_cell_proliferation	Biological Process	3	41	314	17492	0.0369856	0.364291	1.43197	4.07612	0.00955414	DRD2//PAX6//TERT
GO:0051966	regulation_of_synaptic_transmission,_glutamatergic	Biological Process	4	70	314	17492	0.0370755	0.364291	1.43091	3.18326	0.0127389	DRD2//NLGN2//SHANK1//TNR
GO:0072655	establishment_of_protein_localization_to_mitochondrion	Biological Process	4	70	314	17492	0.0370755	0.364291	1.43091	3.18326	0.0127389	BAX//ROMO1//TIMM9//TOMM20
GO:0006720	isoprenoid_metabolic_process	Biological Process	6	137	314	17492	0.0372594	0.364291	1.42876	2.43972	0.0191083	APOM//CYP1A2//CYP3A5//GPC1//GPC2//RHO
GO:0046683	response_to_organophosphorus	Biological Process	6	137	314	17492	0.0372594	0.364291	1.42876	2.43972	0.0191083	AANAT//AHR//AQP8//CIB2//JUN//SSH1
GO:1904951	positive_regulation_of_establishment_of_protein_localization	Biological Process	14	458	314	17492	0.0376649	0.367206	1.42406	1.70283	0.044586	CASP8//CCL19//DRD2//EMD//GOLPH3//HMHB1//MAPK11//NLGN2//PARD6A//PLA2G1B//PPP3R1//PRNP//SFN//TNFRSF4
GO:0060429	epithelium_development	Biological Process	28	1096	314	17492	0.0380546	0.368929	1.41959	1.42317	0.089172	AIRE//ASTN2//CTSZ//DEAF1//DSPP//FN3K//FOXC1//FOXD1//GDNF//JUN//KRT9//KRTAP1-3//KRTAP10-10//KRTAP19-1//KRTAP5-9//KRTAP8-1//LCE1F//LCE2A//LCE2C//LGR4//MESP1//NFATC4//ORAI1//PAX6//PRNP//SFN//TCF15//TMEFF2
GO:0006629	lipid_metabolic_process	Biological Process	30	1191	314	17492	0.0380573	0.368929	1.41956	1.4032	0.0955414	ACBD5//ALKBH7//APOM//BAX//CACNA1H//CHAT//CPNE6//CPNE7//CYP1A2//CYP2B6//CYP3A5//GGT5//GPC1//GPC2//GPX4//HSD3B7//IPMK//MOGAT3//ORMDL2//PAFAH1B3//PLA2G1B//PLA2G2D//PLA2G4D//PRPF19//RHO//SEL1L//SLC16A1//SLC27A1//SLC27A5//UCP3
GO:0051128	regulation_of_cellular_component_organization	Biological Process	56	2477	314	17492	0.0387698	0.37421	1.41151	1.25942	0.178344	AGTR1//APOM//APPL1//ARHGEF15//AVP//BAX//BRWD3//CASP8//CCL19//CCL24//CHCHD10//CHRNB2//CLSTN1//CPNE6//CTSZ//DAPK3//DRD2//FBXW5//GOLPH3//GPC2//GRIK5//HIST1H1D//HIST1H1E//IAPP//JMJD4//LRFN1//LRFN3//MAD1L1//MAPK15//MARK4//METRN//MPP7//MTF2//NEUROD2//NFATC4//NLGN2//PAK4//PLXNA3//PMEPA1//PPP3R1//PRNP//SEMA6B//SET//SFN//SHANK1//SPEF1//SSH1//SYNJ2BP//TAOK1//TCF15//TLX2//TMEFF2//TNR//UBE2C//WDR54//ZNHIT1
GO:2001235	positive_regulation_of_apoptotic_signaling_pathway	Biological Process	7	175	314	17492	0.0388489	0.37421	1.41062	2.22828	0.022293	BAX//CASP8//CHCHD10//DAPK3//NFATC4//PPP3R1//SFN
GO:0007409	axonogenesis	Biological Process	12	375	314	17492	0.0389301	0.37421	1.40971	1.78262	0.0382166	ALCAM//ARTN//C12orf57//CHRNB2//DRD2//FOXD1//GDNF//GPC1//PAX6//PLXNA3//TMEFF2//TNR
GO:0021983	pituitary_gland_development	Biological Process	3	42	314	17492	0.0393178	0.375834	1.40541	3.97907	0.00955414	DRD2//PAX6//SOX3
GO:0098662	inorganic_cation_transmembrane_transport	Biological Process	18	637	314	17492	0.0393237	0.375834	1.40535	1.57414	0.0573248	CACNA1C//CACNA1H//CCL19//COX5A//COX6B1//COX8A//DRD2//GRIK5//KCNC3//KCNK4//ORAI1//SCARA5//SLC17A4//SLC17A5//SLC30A2//SLC5A3//SLC6A19//UCP3
GO:0050708	regulation_of_protein_secretion	Biological Process	14	461	314	17492	0.0394285	0.375834	1.40419	1.69175	0.044586	ADRA2C//CACNA1C//CCL19//DRD2//GOLPH3//HMHB1//LGR4//MAPK11//NLGN2//PARD6A//PLA2G1B//REST//SLC16A1//TNFRSF4
GO:0045893	positive_regulation_of_transcription,_DNA-templated	Biological Process	37	1534	314	17492	0.0397855	0.378183	1.40027	1.34365	0.117834	AHR//AIRE//ASH1L//ATF6B//CASZ1//CHCHD10//DEAF1//DRD2//FOXC1//FOXD1//FOXD3//GDNF//HIST1H1D//HIST1H1E//JUN//LGR4//MAFA//MESP1//MTF2//NEUROD2//NFATC4//PAX6//PAX9//PITX3//PLA2G1B//PPP3R1//REST//SIX5//SMARCD1//TAF15//TCF15//TERT//TLX2//TNNI2//UBE2V1//ZNF292//ZNF609
GO:0045597	positive_regulation_of_cell_differentiation	Biological Process	25	960	314	17492	0.0400916	0.378684	1.39695	1.4507	0.0796178	ACIN1//ADRA2C//AGTR1//CASP8//CCL19//CPNE6//DRD2//FOXC1//GDNF//GPC1//GPC2//IL7R//JUN//MAPK11//MESP1//METRN//NEUROD2//PAX6//PLXNA3//PRPF19//REST//SFN//SHANK1//TERT//ZNF609
GO:0007224	smoothened_signaling_pathway	Biological Process	4	72	314	17492	0.0404765	0.378684	1.3928	3.09483	0.0127389	DHH//GPC2//MAP3K10//PAX6
GO:1901292	nucleoside_phosphate_catabolic_process	Biological Process	4	72	314	17492	0.0404765	0.378684	1.3928	3.09483	0.0127389	ENTPD2//NUDT18//PDE4C//PDE7A
GO:0048339	paraxial_mesoderm_development	Biological Process	2	18	314	17492	0.040673	0.378684	1.39069	6.18967	0.00636943	FOXC1//TCF15
GO:0071318	cellular_response_to_ATP	Biological Process	2	18	314	17492	0.040673	0.378684	1.39069	6.18967	0.00636943	CIB2//SSH1
GO:0072202	cell_differentiation_involved_in_metanephros_development	Biological Process	2	18	314	17492	0.040673	0.378684	1.39069	6.18967	0.00636943	GDNF//LGR4
GO:0090190	positive_regulation_of_branching_involved_in_ureteric_bud_morphogenesis	Biological Process	2	18	314	17492	0.040673	0.378684	1.39069	6.18967	0.00636943	GDNF//LGR4
GO:0045185	maintenance_of_protein_location	Biological Process	5	105	314	17492	0.0408341	0.378684	1.38898	2.65271	0.0159236	GOLPH3//GRIK5//MDFI//SHANK1//TAF3
GO:0051963	regulation_of_synapse_assembly	Biological Process	5	105	314	17492	0.0408341	0.378684	1.38898	2.65271	0.0159236	CHRNB2//CLSTN1//LRFN1//LRFN3//NLGN2
GO:0051480	regulation_of_cytosolic_calcium_ion_concentration	Biological Process	11	337	314	17492	0.0415761	0.380349	1.38116	1.81833	0.0350318	AGTR1//AVP//BAX//CACNA1C//CCL19//CCR10//CIB2//CYSLTR1//DRD2//IAPP//PLA2G1B
GO:0070509	calcium_ion_import	Biological Process	3	43	314	17492	0.0417229	0.380349	1.37963	3.88654	0.00955414	CACNA1C//CACNA1H//ORAI1
GO:0031345	negative_regulation_of_cell_projection_organization	Biological Process	7	178	314	17492	0.0419474	0.380349	1.3773	2.19072	0.022293	CTSZ//NFATC4//PLXNA3//PRNP//SEMA6B//TLX2//TNR
GO:0098655	cation_transmembrane_transport	Biological Process	20	735	314	17492	0.0430429	0.380349	1.3661	1.51584	0.0636943	CACNA1C//CACNA1H//CCL19//CHRNA4//CHRNB2//COX5A//COX6B1//COX8A//DRD2//GRIK5//KCNC3//KCNK4//ORAI1//SCARA5//SLC17A4//SLC17A5//SLC30A2//SLC5A3//SLC6A19//UCP3
GO:0043269	regulation_of_ion_transport	Biological Process	19	691	314	17492	0.043866	0.380349	1.35787	1.53174	0.0605096	AVP//BAX//CACNA1C//CACNA1H//CHCHD10//CHRNA4//CHRNB2//CNIH2//DRD2//FXYD5//GDNF//GNAO1//KCNC3//KCNK4//NLGN2//ORAI1//PLA2G1B//PRNP//SHANK1
GO:0043068	positive_regulation_of_programmed_cell_death	Biological Process	18	646	314	17492	0.0440381	0.380349	1.35617	1.55221	0.0573248	APH1A//BAX//CASP8//CHCHD10//CTSZ//DAPK3//GRIK5//IAPP//JUN//MAP3K10//MARK4//NFATC4//PITX3//PLEKHN1//PPP3R1//PRNP//REST//SFN
GO:0007422	peripheral_nervous_system_development	Biological Process	4	74	314	17492	0.0440491	0.380349	1.35606	3.01119	0.0127389	ARTN//GDNF//GPC1//SLC5A3
GO:0032507	maintenance_of_protein_location_in_cell	Biological Process	4	74	314	17492	0.0440491	0.380349	1.35606	3.01119	0.0127389	GOLPH3//GRIK5//SHANK1//TAF3
GO:0030856	regulation_of_epithelial_cell_differentiation	Biological Process	6	143	314	17492	0.0443779	0.380349	1.35283	2.33736	0.0191083	DSPP//FOXC1//GDNF//MESP1//PAX6//SFN
GO:0032774	RNA_biosynthetic_process	Biological Process	18	647	314	17492	0.044586	0.380349	1.3508	1.54981	0.0573248	AHR//ASH1L//ATF6B//BAX//COL4A2//CRCP//DEAF1//INTS1//JUN//NFATC4//NPM3//PAX6//POLR2J2//SYMPK//TAF15//TAF3//TERT//ZNF345
GO:0006337	nucleosome_disassembly	Biological Process	2	19	314	17492	0.0449304	0.380349	1.34746	5.8639	0.00636943	SET//SMARCD1
GO:0030150	protein_import_into_mitochondrial_matrix	Biological Process	2	19	314	17492	0.0449304	0.380349	1.34746	5.8639	0.00636943	ROMO1//TOMM20
GO:0045655	regulation_of_monocyte_differentiation	Biological Process	2	19	314	17492	0.0449304	0.380349	1.34746	5.8639	0.00636943	ACIN1//JUN
GO:0048486	parasympathetic_nervous_system_development	Biological Process	2	19	314	17492	0.0449304	0.380349	1.34746	5.8639	0.00636943	GDNF//PLXNA3
GO:0099068	postsynapse_assembly	Biological Process	2	19	314	17492	0.0449304	0.380349	1.34746	5.8639	0.00636943	NLGN2//SHANK1
GO:0023014	signal_transduction_by_protein_phosphorylation	Biological Process	12	384	314	17492	0.0452054	0.380349	1.34481	1.74084	0.0382166	ARTN//AVP//CCL19//DUSP9//GDNF//IQGAP3//MAP3K10//MAPK11//MAPK15//PAK4//TAOK1//UBE2V1
GO:0010942	positive_regulation_of_cell_death	Biological Process	19	694	314	17492	0.0454618	0.380349	1.34235	1.52512	0.0605096	APH1A//BAX//CASP8//CHCHD10//CTSZ//DAPK3//GRIK5//IAPP//JUN//MAP3K10//MARK4//NFATC4//PITX3//PLEKHN1//PPP3R1//PRNP//REST//SFN//SSH1
GO:0045664	regulation_of_neuron_differentiation	Biological Process	18	650	314	17492	0.0462593	0.380349	1.3348	1.54266	0.0573248	ADRA2C//CHRNB2//CPNE6//CTSZ//DDX6//GPC2//METRN//NEUROD2//NFATC4//PAX6//PLXNA3//PRPF19//REST//SEMA6B//SHANK1//SOX3//TLX2//TNR
GO:1905039	carboxylic_acid_transmembrane_transport	Biological Process	7	182	314	17492	0.046322	0.380349	1.33421	2.14258	0.022293	SLC16A1//SLC16A8//SLC17A5//SLC26A1//SLC27A1//SLC27A5//SLC6A19
GO:0006195	purine_nucleotide_catabolic_process	Biological Process	3	45	314	17492	0.0467497	0.380349	1.33022	3.7138	0.00955414	NUDT18//PDE4C//PDE7A
GO:0043297	apical_junction_assembly	Biological Process	3	45	314	17492	0.0467497	0.380349	1.33022	3.7138	0.00955414	MPP7//PARD6A//STRN
GO:0048483	autonomic_nervous_system_development	Biological Process	3	45	314	17492	0.0467497	0.380349	1.33022	3.7138	0.00955414	GDNF//PLXNA3//TLX2
GO:0051047	positive_regulation_of_secretion	Biological Process	13	430	314	17492	0.0474403	0.380349	1.32385	1.68417	0.0414013	AVP//CACNA1H//CCL19//CHRNB2//DRD2//GDNF//GOLPH3//HMHB1//MAPK11//NLGN2//PARD6A//PLA2G1B//TNFRSF4
GO:0007411	axon_guidance	Biological Process	9	262	314	17492	0.0475074	0.380349	1.32324	1.9136	0.0286624	ALCAM//ARTN//FOXD1//GDNF//GPC1//PAX6//PLXNA3//TMEFF2//TNR
GO:0090150	establishment_of_protein_localization_to_membrane	Biological Process	9	262	314	17492	0.0475074	0.380349	1.32324	1.9136	0.0286624	BAX//CLSTN1//GOLPH3//ROMO1//RPL36//RPS13//SRP72//TIMM9//ZFAND2B
GO:0051604	protein_maturation	Biological Process	8	222	314	17492	0.0475342	0.380349	1.32299	2.00746	0.0254777	AANAT//APH1A//CASP8//CISD3//CTSZ//DUOXA2//PCSK4//TMEM208
GO:0070663	regulation_of_leukocyte_proliferation	Biological Process	8	222	314	17492	0.0475342	0.380349	1.32299	2.00746	0.0254777	AHR//CCL19//CD320//CHRNB2//MAD1L1//PLA2G2D//PRNP//TNFRSF4
GO:0006690	icosanoid_metabolic_process	Biological Process	5	110	314	17492	0.0482239	0.380349	1.31674	2.53214	0.0159236	CYP1A2//CYP2B6//GGT5//GPX4//PLA2G1B
GO:0048667	cell_morphogenesis_involved_in_neuron_differentiation	Biological Process	13	432	314	17492	0.0488895	0.380349	1.31078	1.67637	0.0414013	ALCAM//ARTN//C12orf57//CHRNB2//DRD2//FOXD1//GDNF//GPC1//PAX6//PLXNA3//SHANK1//TMEFF2//TNR
GO:0019370	leukotriene_biosynthetic_process	Biological Process	2	20	314	17492	0.049344	0.380349	1.30677	5.5707	0.00636943	GGT5//PLA2G1B
GO:0023019	signal_transduction_involved_in_regulation_of_gene_expression	Biological Process	2	20	314	17492	0.049344	0.380349	1.30677	5.5707	0.00636943	MESP1//PAX6
GO:0031936	negative_regulation_of_chromatin_silencing	Biological Process	2	20	314	17492	0.049344	0.380349	1.30677	5.5707	0.00636943	HIST1H1D//HIST1H1E
GO:0051580	regulation_of_neurotransmitter_uptake	Biological Process	2	20	314	17492	0.049344	0.380349	1.30677	5.5707	0.00636943	DRD2//GDNF
GO:0060396	growth_hormone_receptor_signaling_pathway	Biological Process	2	20	314	17492	0.049344	0.380349	1.30677	5.5707	0.00636943	CSH2//GH2
GO:0070989	oxidative_demethylation	Biological Process	2	20	314	17492	0.049344	0.380349	1.30677	5.5707	0.00636943	CYP1A2//CYP3A5
GO:0060291	long-term_synaptic_potentiation	Biological Process	3	46	314	17492	0.0493699	0.380349	1.30654	3.63307	0.00955414	NFATC4//SHANK1//TNR
GO:2001239	regulation_of_extrinsic_apoptotic_signaling_pathway_in_absence_of_ligand	Biological Process	3	46	314	17492	0.0493699	0.380349	1.30654	3.63307	0.00955414	DAPK3//GDNF//TERT
GO:0070585	protein_localization_to_mitochondrion	Biological Process	4	77	314	17492	0.0497291	0.380349	1.30339	2.89387	0.0127389	BAX//ROMO1//TIMM9//TOMM20
GO:0001676	long-chain_fatty_acid_metabolic_process	Biological Process	5	111	314	17492	0.0497906	0.380349	1.30285	2.50932	0.0159236	CYP1A2//CYP2B6//GPX4//SLC27A1//SLC27A5
GO:0010629	negative_regulation_of_gene_expression	Biological Process	40	1712	314	17492	0.0503607	0.380349	1.29791	1.30157	0.127389	AHR//ASCL5//CHAC1//CTSZ//DAPK3//DDX6//DEAF1//FOXC1//FOXD1//FOXD3//FOXS1//GFI1B//HIST1H1D//HIST1H1E//HMX1//IQGAP3//JUN//LGR4//MAP3K10//MDFI//MESP1//MTF2//NFATC4//PAX6//PAX9//PLEKHN1//PRNP//REST//RPL36//RPS13//SCRT2//SET//SIX5//TAF3//TERT//TNFRSF4//XIAP//ZC3H7B//ZNF157//ZNF345
GO:0097485	neuron_projection_guidance	Biological Process	9	265	314	17492	0.0503818	0.380349	1.29773	1.89194	0.0286624	ALCAM//ARTN//FOXD1//GDNF//GPC1//PAX6//PLXNA3//TMEFF2//TNR
GO:0015980	energy_derivation_by_oxidation_of_organic_compounds	Biological Process	8	225	314	17492	0.0506908	0.380349	1.29507	1.98069	0.0254777	COX5A//COX6B1//COX8A//CYP1A2//DLST//NDUFB10//NFATC4//OGDH
GO:0048167	regulation_of_synaptic_plasticity	Biological Process	7	186	314	17492	0.0509787	0.380349	1.29261	2.0965	0.022293	DRD2//NEUROD2//NFATC4//PRNP//SHANK1//SSH1//TNR
GO:0048194	Golgi_vesicle_budding	Biological Process	4	78	314	17492	0.0517078	0.380349	1.28644	2.85677	0.0127389	CNIH2//CTSZ//GOLPH3//TRAPPC5
GO:0008542	visual_learning	Biological Process	3	47	314	17492	0.0520604	0.380349	1.28349	3.55577	0.00955414	CHRNB2//DEAF1//DRD2
GO:0048247	lymphocyte_chemotaxis	Biological Process	3	47	314	17492	0.0520604	0.380349	1.28349	3.55577	0.00955414	CCL19//CCL24//HSD3B7
GO:0031324	negative_regulation_of_cellular_metabolic_process	Biological Process	56	2525	314	17492	0.0525839	0.380349	1.27915	1.23548	0.178344	A2ML1//AHR//ASCL5//ASH1L//AVP//BAX//CHAC1//CTSZ//DAPK3//DEAF1//DRD2//DUSP9//FOXC1//FOXD1//FOXD3//FOXS1//GDNF//GFI1B//HIST1H1D//HIST1H1E//HMX1//JUN//LGR4//MAP3K10//MDFI//MESP1//MTF2//MYCNOS//NEUROD2//NFATC4//ORMDL2//PARD6A//PAX6//PAX9//PBLD//PLEKHN1//PMEPA1//PRNP//REST//RPS13//SCRT2//SET//SFN//SIX5//SLC27A1//SOX3//SYNJ2BP//TAF15//TAF3//TERT//TNFRSF4//VPS25//WDR54//XIAP//ZNF157//ZNF345
GO:0007005	mitochondrion_organization	Biological Process	13	437	314	17492	0.052646	0.380349	1.27863	1.65719	0.0414013	ALKBH7//BAX//CASP8//CHCHD10//JUN//NDUFB10//PPP3R1//ROMO1//SFN//SYNJ2BP//TERT//TIMM9//TOMM20
GO:0035556	intracellular_signal_transduction	Biological Process	39	1669	314	17492	0.0528817	0.380349	1.27669	1.30172	0.124204	ADRA2C//AGTR1//AHR//ARTN//ASB16//AVP//BAX//CACNA1C//CASP8//CCL19//CCR10//CHAC1//DAPK3//DRD2//DUSP9//GDNF//GPHB5//GPR78//IAPP//IQGAP3//JUN//LGR4//MAFA//MAP3K10//MAPK11//MAPK15//MARK4//MT1F//NFATC4//PLA2G1B//PPP3R1//PRNP//PRPF19//RASL12//RCAN3//SFN//SYNJ2BP//TAOK1//UBE2V1
GO:0098693	regulation_of_synaptic_vesicle_cycle	Biological Process	5	113	314	17492	0.0530131	0.380349	1.27562	2.46491	0.0159236	CHRNA4//CHRNB2//DRD2//GRIK5//NLGN2
GO:0006518	peptide_metabolic_process	Biological Process	15	526	314	17492	0.0531505	0.380349	1.27449	1.5886	0.0477707	APH1A//C12orf65//CDKAL1//CHAC1//CTSZ//GATC//GGT5//GPX4//GSTM5//MRPL52//MRPL55//MRPS12//PCSK4//RPL36//RPS13
GO:0001654	eye_development	Biological Process	11	352	314	17492	0.053688	0.380349	1.27012	1.74084	0.0350318	ARHGEF15//BAX//C12orf57//CACNA1C//FOXC1//FSCN2//JUN//PAX6//PITX3//RHO//SIX5
GO:0010977	negative_regulation_of_neuron_projection_development	Biological Process	6	150	314	17492	0.0536904	0.380349	1.2701	2.22828	0.0191083	CTSZ//NFATC4//PLXNA3//SEMA6B//TLX2//TNR
GO:2000300	regulation_of_synaptic_vesicle_exocytosis	Biological Process	4	79	314	17492	0.053729	0.380349	1.26979	2.82061	0.0127389	CHRNA4//CHRNB2//DRD2//GRIK5
GO:0006833	water_transport	Biological Process	2	21	314	17492	0.0539069	0.380349	1.26836	5.30543	0.00636943	AQP8//AVP
GO:0007263	nitric_oxide_mediated_signal_transduction	Biological Process	2	21	314	17492	0.0539069	0.380349	1.26836	5.30543	0.00636943	MAFA//MT1F
GO:0010644	cell_communication_by_electrical_coupling	Biological Process	2	21	314	17492	0.0539069	0.380349	1.26836	5.30543	0.00636943	CACNA1C//GJD3
GO:0019373	epoxygenase_P450_pathway	Biological Process	2	21	314	17492	0.0539069	0.380349	1.26836	5.30543	0.00636943	CYP1A2//CYP2B6
GO:0021854	hypothalamus_development	Biological Process	2	21	314	17492	0.0539069	0.380349	1.26836	5.30543	0.00636943	BAX//SOX3
GO:0032094	response_to_food	Biological Process	2	21	314	17492	0.0539069	0.380349	1.26836	5.30543	0.00636943	GAST//SLC16A1
GO:0032986	protein-DNA_complex_disassembly	Biological Process	2	21	314	17492	0.0539069	0.380349	1.26836	5.30543	0.00636943	SET//SMARCD1
GO:0042749	regulation_of_circadian_sleep|wake_cycle	Biological Process	2	21	314	17492	0.0539069	0.380349	1.26836	5.30543	0.00636943	CHRNB2//DRD2
GO:0046827	positive_regulation_of_protein_export_from_nucleus	Biological Process	2	21	314	17492	0.0539069	0.380349	1.26836	5.30543	0.00636943	EMD//SFN
GO:0071378	cellular_response_to_growth_hormone_stimulus	Biological Process	2	21	314	17492	0.0539069	0.380349	1.26836	5.30543	0.00636943	CSH2//GH2
GO:0072273	metanephric_nephron_morphogenesis	Biological Process	2	21	314	17492	0.0539069	0.380349	1.26836	5.30543	0.00636943	GDNF//LGR4
GO:0009409	response_to_cold	Biological Process	3	48	314	17492	0.0548204	0.385999	1.26106	3.48169	0.00955414	CASP8//SLC27A1//UCP3
GO:0051046	regulation_of_secretion	Biological Process	21	804	314	17492	0.0553763	0.389113	1.25668	1.45503	0.066879	ADRA2C//AGTR1//AVP//CACNA1C//CACNA1H//CCL19//CHRNA4//CHRNB2//DRD2//GDNF//GOLPH3//GRIK5//HMHB1//LGR4//MAPK11//NLGN2//PARD6A//PLA2G1B//REST//SLC16A1//TNFRSF4
GO:0070098	chemokine-mediated_signaling_pathway	Biological Process	4	80	314	17492	0.0557926	0.390539	1.25342	2.78535	0.0127389	CCL19//CCL24//CCR10//FOXC1
GO:0043010	camera-type_eye_development	Biological Process	10	312	314	17492	0.0558076	0.390539	1.25331	1.78548	0.0318471	ARHGEF15//BAX//C12orf57//CACNA1C//FOXC1//JUN//PAX6//PITX3//RHO//SIX5
GO:0050714	positive_regulation_of_protein_secretion	Biological Process	9	271	314	17492	0.056469	0.391484	1.24819	1.85005	0.0286624	CCL19//DRD2//GOLPH3//HMHB1//MAPK11//NLGN2//PARD6A//PLA2G1B//TNFRSF4
GO:0042113	B_cell_activation	Biological Process	6	152	314	17492	0.0565531	0.391484	1.24754	2.19896	0.0191083	BAX//CASP8//CHRNA4//CHRNB2//IFNA4//IL7R
GO:0150063	visual_system_development	Biological Process	11	356	314	17492	0.0572796	0.391484	1.242	1.72128	0.0350318	ARHGEF15//BAX//C12orf57//CACNA1C//FOXC1//FSCN2//JUN//PAX6//PITX3//RHO//SIX5
GO:0048678	response_to_axon_injury	Biological Process	3	49	314	17492	0.057649	0.391484	1.23921	3.41063	0.00955414	BAX//DRD2//JUN
GO:0065002	intracellular_protein_transmembrane_transport	Biological Process	3	49	314	17492	0.057649	0.391484	1.23921	3.41063	0.00955414	ROMO1//TOMM20//ZFAND2B
GO:0097194	execution_phase_of_apoptosis	Biological Process	3	49	314	17492	0.057649	0.391484	1.23921	3.41063	0.00955414	ACIN1//CASP8//TAOK1
GO:0021954	central_nervous_system_neuron_development	Biological Process	4	81	314	17492	0.0578984	0.391484	1.23733	2.75096	0.0127389	C12orf57//CHRNB2//DRD2//PLXNA3
GO:0030855	epithelial_cell_differentiation	Biological Process	18	669	314	17492	0.0579134	0.391484	1.23722	1.49884	0.0573248	DSPP//FN3K//GDNF//JUN//KRT9//KRTAP1-3//KRTAP10-10//KRTAP19-1//KRTAP5-9//KRTAP8-1//LCE1F//LCE2A//LCE2C//MESP1//PAX6//PRNP//SFN//TCF15
GO:0006119	oxidative_phosphorylation	Biological Process	5	116	314	17492	0.0580696	0.391484	1.23605	2.40116	0.0159236	CHCHD10//COX5A//COX6B1//COX8A//NDUFB10
GO:0007520	myoblast_fusion	Biological Process	2	22	314	17492	0.0586125	0.391484	1.23201	5.06427	0.00636943	ADAM12//CACNA1H
GO:0031281	positive_regulation_of_cyclase_activity	Biological Process	2	22	314	17492	0.0586125	0.391484	1.23201	5.06427	0.00636943	CACNA1C//ORAI1
GO:0046058	cAMP_metabolic_process	Biological Process	2	22	314	17492	0.0586125	0.391484	1.23201	5.06427	0.00636943	PDE4C//PDE7A
GO:0090189	regulation_of_branching_involved_in_ureteric_bud_morphogenesis	Biological Process	2	22	314	17492	0.0586125	0.391484	1.23201	5.06427	0.00636943	GDNF//LGR4
GO:1903507	negative_regulation_of_nucleic_acid-templated_transcription	Biological Process	30	1240	314	17492	0.0586784	0.391484	1.23152	1.34775	0.0955414	AHR//ASCL5//DEAF1//FOXC1//FOXD1//FOXD3//FOXS1//GFI1B//HIST1H1D//HIST1H1E//HMX1//JUN//LGR4//MAP3K10//MDFI//MESP1//MTF2//NEUROD2//NFATC4//PAX6//PAX9//REST//SCRT2//SET//SIX5//SOX3//TAF3//TNFRSF4//ZNF157//ZNF345
GO:0014074	response_to_purine-containing_compound	Biological Process	6	154	314	17492	0.059506	0.391484	1.22544	2.1704	0.0191083	AANAT//AHR//AQP8//CIB2//JUN//SSH1
GO:1902679	negative_regulation_of_RNA_biosynthetic_process	Biological Process	30	1242	314	17492	0.0596641	0.391484	1.22429	1.34558	0.0955414	AHR//ASCL5//DEAF1//FOXC1//FOXD1//FOXD3//FOXS1//GFI1B//HIST1H1D//HIST1H1E//HMX1//JUN//LGR4//MAP3K10//MDFI//MESP1//MTF2//NEUROD2//NFATC4//PAX6//PAX9//REST//SCRT2//SET//SIX5//SOX3//TAF3//TNFRSF4//ZNF157//ZNF345
GO:0043410	positive_regulation_of_MAPK_cascade	Biological Process	15	535	314	17492	0.0597466	0.391484	1.22369	1.56188	0.0477707	ADRA2C//CCL19//CCL24//DDT//DRD2//DUSP9//IAPP//IQGAP3//JUN//MAP3K10//MAPK11//NENF//PLA2G1B//TAOK1//UBE2V1
GO:0010822	positive_regulation_of_mitochondrion_organization	Biological Process	5	117	314	17492	0.0598145	0.391484	1.22319	2.38064	0.0159236	BAX//CASP8//CHCHD10//PPP3R1//SFN
GO:0048145	regulation_of_fibroblast_proliferation	Biological Process	4	82	314	17492	0.0600463	0.391484	1.22151	2.71741	0.0127389	BAX//EMD//JUN//PLA2G1B
GO:0071277	cellular_response_to_calcium_ion	Biological Process	4	82	314	17492	0.0600463	0.391484	1.22151	2.71741	0.0127389	CPNE6//CPNE7//JUN//NEUROD2
GO:0043113	receptor_clustering	Biological Process	3	50	314	17492	0.0605455	0.391484	1.21792	3.34242	0.00955414	GRIK5//SYNJ2BP//TMEFF2
GO:0051055	negative_regulation_of_lipid_biosynthetic_process	Biological Process	3	50	314	17492	0.0605455	0.391484	1.21792	3.34242	0.00955414	ORMDL2//REST//SLC27A1
GO:0000165	MAPK_cascade	Biological Process	11	360	314	17492	0.0610275	0.391484	1.21447	1.70216	0.0350318	ARTN//AVP//CCL19//DUSP9//GDNF//IQGAP3//MAP3K10//MAPK11//MAPK15//TAOK1//UBE2V1
GO:0007568	aging	Biological Process	9	276	314	17492	0.0618914	0.391484	1.20837	1.81653	0.0286624	COL4A2//GNAO1//GPX4//JUN//PITX3//PRNP//ROMO1//TERT//UCP3
GO:0048880	sensory_system_development	Biological Process	11	361	314	17492	0.0619891	0.391484	1.20768	1.69744	0.0350318	ARHGEF15//BAX//C12orf57//CACNA1C//FOXC1//FSCN2//JUN//PAX6//PITX3//RHO//SIX5
GO:0046651	lymphocyte_proliferation	Biological Process	4	83	314	17492	0.0622361	0.391484	1.20596	2.68468	0.0127389	BAX//IFNA4//IL7R//TNFRSF4
GO:0015711	organic_anion_transport	Biological Process	13	450	314	17492	0.0633256	0.391484	1.19842	1.60931	0.0414013	CA5A//DRD2//PLA2G1B//PLA2G2D//PRELID2//SLC16A1//SLC16A8//SLC17A5//SLC22A7//SLC26A1//SLC27A1//SLC27A5//SLC6A19
GO:0002052	positive_regulation_of_neuroblast_proliferation	Biological Process	2	23	314	17492	0.063454	0.391484	1.19754	4.84409	0.00636943	DRD2//PAX6
GO:0003081	regulation_of_systemic_arterial_blood_pressure_by_renin-angiotensin	Biological Process	2	23	314	17492	0.063454	0.391484	1.19754	4.84409	0.00636943	AGTR1//CTSZ
GO:0007340	acrosome_reaction	Biological Process	2	23	314	17492	0.063454	0.391484	1.19754	4.84409	0.00636943	PCSK4//STX2
GO:0007530	sex_determination	Biological Process	2	23	314	17492	0.063454	0.391484	1.19754	4.84409	0.00636943	DHH//SOX3
GO:0009651	response_to_salt_stress	Biological Process	2	23	314	17492	0.063454	0.391484	1.19754	4.84409	0.00636943	AVP//BAX
GO:0043576	regulation_of_respiratory_gaseous_exchange	Biological Process	2	23	314	17492	0.063454	0.391484	1.19754	4.84409	0.00636943	NLGN2//SLC5A3
GO:0051349	positive_regulation_of_lyase_activity	Biological Process	2	23	314	17492	0.063454	0.391484	1.19754	4.84409	0.00636943	CACNA1C//ORAI1
GO:0006939	smooth_muscle_contraction	Biological Process	3	51	314	17492	0.0635088	0.391484	1.19717	3.27688	0.00955414	CHRNB2//DRD2//GDNF
GO:0007631	feeding_behavior	Biological Process	4	84	314	17492	0.0644675	0.391484	1.19066	2.65271	0.0127389	CHRNB2//DRD2//IAPP//TCF15
GO:0032943	mononuclear_cell_proliferation	Biological Process	4	84	314	17492	0.0644675	0.391484	1.19066	2.65271	0.0127389	BAX//IFNA4//IL7R//TNFRSF4
GO:0042475	odontogenesis_of_dentin-containing_tooth	Biological Process	4	84	314	17492	0.0644675	0.391484	1.19066	2.65271	0.0127389	BAX//DSPP//FOXC1//GNAO1
GO:0030010	establishment_of_cell_polarity	Biological Process	5	120	314	17492	0.0652266	0.391484	1.18558	2.32113	0.0159236	CCL19//GOLPH3//MPP7//PAX6//TCF15
GO:0008544	epidermis_development	Biological Process	12	409	314	17492	0.0662178	0.391484	1.17903	1.63444	0.0382166	KRT9//KRTAP1-3//KRTAP10-10//KRTAP19-1//KRTAP5-9//KRTAP8-1//LCE1F//LCE2A//LCE2C//LGR4//PAX6//SFN
GO:0006351	transcription,_DNA-templated	Biological Process	17	635	314	17492	0.0664474	0.391484	1.17752	1.49137	0.0541401	AHR//ASH1L//ATF6B//BAX//COL4A2//CRCP//DEAF1//INTS1//JUN//NFATC4//NPM3//PAX6//POLR2J2//SYMPK//TAF15//TAF3//ZNF345
GO:0007632	visual_behavior	Biological Process	3	52	314	17492	0.0665381	0.391484	1.17693	3.21387	0.00955414	CHRNB2//DEAF1//DRD2
GO:0021879	forebrain_neuron_differentiation	Biological Process	3	52	314	17492	0.0665381	0.391484	1.17693	3.21387	0.00955414	DRD2//PAX6//PLXNA3
GO:0035176	social_behavior	Biological Process	3	52	314	17492	0.0665381	0.391484	1.17693	3.21387	0.00955414	AVP//CHRNB2//SHANK1
GO:0042220	response_to_cocaine	Biological Process	3	52	314	17492	0.0665381	0.391484	1.17693	3.21387	0.00955414	CHRNB2//DRD2//PITX3
GO:0001656	metanephros_development	Biological Process	4	85	314	17492	0.0667404	0.391484	1.17561	2.62151	0.0127389	APH1A//FOXD1//GDNF//LGR4
GO:2000177	regulation_of_neural_precursor_cell_proliferation	Biological Process	4	85	314	17492	0.0667404	0.391484	1.17561	2.62151	0.0127389	CTSZ//DRD2//PAX6//PITX3
GO:0042127	regulation_of_cell_population_proliferation	Biological Process	37	1602	314	17492	0.0669559	0.391484	1.17421	1.28662	0.117834	AGTR1//AHR//AVP//BAX//CCL19//CCL24//CD320//CHRNB2//CTSZ//DEAF1//DRD2//EMD//GDNF//HIST1H2AB//IL7R//IQGAP3//JUN//MAD1L1//MAPK11//MAPK15//MYCNOS//PAX6//PBLD//PITX3//PLA2G1B//PLA2G2D//PRNP//REST//ROMO1//SFN//SIX5//STRN//SYNJ2BP//TERT//TNFRSF4//XIAP//ZNF609
GO:0006091	generation_of_precursor_metabolites_and_energy	Biological Process	12	410	314	17492	0.0671722	0.391484	1.17281	1.63045	0.0382166	AVP//CHCHD10//COX5A//COX6B1//COX8A//CYP1A2//DLST//NDUFB10//NFATC4//OGDH//PGLS//SLC27A5
GO:0019752	carboxylic_acid_metabolic_process	Biological Process	22	871	314	17492	0.0676404	0.391484	1.16979	1.40707	0.0700637	ACBD5//ALKBH7//CYP1A2//CYP2B6//CYP3A5//DLST//FN3K//GATC//GGT5//GPX4//HSD3B7//OGDH//PLA2G1B//PLA2G4D//PPM1K//PSPH//SARDH//SLC16A1//SLC16A8//SLC27A1//SLC27A5//UCP3
GO:0019835	cytolysis	Biological Process	2	24	314	17492	0.0684253	0.391484	1.16478	4.64225	0.00636943	C7//ROMO1
GO:0032232	negative_regulation_of_actin_filament_bundle_assembly	Biological Process	2	24	314	17492	0.0684253	0.391484	1.16478	4.64225	0.00636943	SHANK1//TMEFF2
GO:0034695	response_to_prostaglandin_E	Biological Process	2	24	314	17492	0.0684253	0.391484	1.16478	4.64225	0.00636943	AANAT//CCL19
GO:0045606	positive_regulation_of_epidermal_cell_differentiation	Biological Process	2	24	314	17492	0.0684253	0.391484	1.16478	4.64225	0.00636943	FOXC1//SFN
GO:0048016	inositol_phosphate-mediated_signaling	Biological Process	2	24	314	17492	0.0684253	0.391484	1.16478	4.64225	0.00636943	NFATC4//PPP3R1
GO:0043433	negative_regulation_of_DNA-binding_transcription_factor_activity	Biological Process	6	160	314	17492	0.0689076	0.391484	1.16173	2.08901	0.0191083	FOXS1//MAP3K10//MDFI//PRNP//TAF3//TNFRSF4
GO:0042476	odontogenesis	Biological Process	5	122	314	17492	0.0689823	0.391484	1.16126	2.28307	0.0159236	BAX//DSPP//FOXC1//GNAO1//PAX9
GO:1905477	positive_regulation_of_protein_localization_to_membrane	Biological Process	5	122	314	17492	0.0689823	0.391484	1.16126	2.28307	0.0159236	CASP8//PPP3R1//PRNP//SFN//SSH1
GO:0051668	localization_within_membrane	Biological Process	4	86	314	17492	0.0690544	0.391484	1.16081	2.59102	0.0127389	CNIH2//GRIK5//SYNJ2BP//TMEFF2
GO:1903305	regulation_of_regulated_secretory_pathway	Biological Process	6	161	314	17492	0.0705536	0.394501	1.15148	2.07604	0.0191083	CACNA1H//CHRNA4//CHRNB2//DRD2//GRIK5//REST
GO:0043065	positive_regulation_of_apoptotic_process	Biological Process	17	641	314	17492	0.0710875	0.396838	1.14821	1.47741	0.0541401	APH1A//BAX//CASP8//CHCHD10//CTSZ//DAPK3//GRIK5//IAPP//JUN//MAP3K10//NFATC4//PITX3//PLEKHN1//PPP3R1//PRNP//REST//SFN
GO:0009967	positive_regulation_of_signal_transduction	Biological Process	38	1663	314	17492	0.0723439	0.403194	1.1406	1.27292	0.121019	ADRA2C//BAX//CASP8//CCL19//CCL24//CD226//CHCHD10//CSH2//DAPK3//DDT//DRD2//DUSP9//FOXD1//GDF1//GH2//GOLPH3//IAPP//IL7R//IQGAP3//JUN//LGR4//MAP3K10//MAPK11//MESP1//MPP7//NENF//NEUROD2//NFATC4//NLGN2//PLA2G1B//PPP3R1//SFN//SHANK1//SSH1//TAOK1//TERT//UBE2V1//XIAP
GO:0071320	cellular_response_to_cAMP	Biological Process	3	54	314	17492	0.0727906	0.405023	1.13792	3.09483	0.00955414	AANAT//AHR//AQP8
GO:0007194	negative_regulation_of_adenylate_cyclase_activity	Biological Process	2	25	314	17492	0.07352	0.40513	1.13359	4.45656	0.00636943	DRD2//LTB4R2
GO:0021952	central_nervous_system_projection_neuron_axonogenesis	Biological Process	2	25	314	17492	0.07352	0.40513	1.13359	4.45656	0.00636943	C12orf57//CHRNB2
GO:0035902	response_to_immobilization_stress	Biological Process	2	25	314	17492	0.07352	0.40513	1.13359	4.45656	0.00636943	CYP1A2//PITX3
GO:0048843	negative_regulation_of_axon_extension_involved_in_axon_guidance	Biological Process	2	25	314	17492	0.07352	0.40513	1.13359	4.45656	0.00636943	PLXNA3//SEMA6B
GO:0071880	adenylate_cyclase-activating_adrenergic_receptor_signaling_pathway	Biological Process	2	25	314	17492	0.07352	0.40513	1.13359	4.45656	0.00636943	ADRA2C//DRD2
GO:2000679	positive_regulation_of_transcription_regulatory_region_DNA_binding	Biological Process	2	25	314	17492	0.07352	0.40513	1.13359	4.45656	0.00636943	FOXC1//PAX6
GO:0009791	post-embryonic_development	Biological Process	4	88	314	17492	0.0738051	0.405617	1.13191	2.53214	0.0127389	ASH1L//BAX//C12orf57//CYP1A2
GO:0002521	leukocyte_differentiation	Biological Process	10	329	314	17492	0.0738455	0.405617	1.13168	1.69322	0.0318471	AIRE//BAX//CASP8//CCL19//IFNA4//IL7R//JUN//MT1G//NCAPH2//PLA2G2D
GO:0006812	cation_transport	Biological Process	22	882	314	17492	0.0750705	0.411019	1.12453	1.38952	0.0700637	CACNA1C//CACNA1H//CCL19//CHRNA4//CHRNB2//COX5A//COX6B1//COX8A//CYSLTR1//DRD2//GRIK5//KCNC3//KCNK4//MAPK15//ORAI1//SCARA5//SLC17A4//SLC17A5//SLC30A2//SLC5A3//SLC6A19//UCP3
GO:0042445	hormone_metabolic_process	Biological Process	7	204	314	17492	0.0755028	0.411019	1.12204	1.91151	0.022293	AANAT//CACNA1H//CHAT//CTSZ//CYP1A2//CYP3A5//PCSK4
GO:0046474	glycerophospholipid_biosynthetic_process	Biological Process	7	204	314	17492	0.0755028	0.411019	1.12204	1.91151	0.022293	CHAT//CPNE6//CPNE7//PLA2G1B//PLA2G2D//PLA2G4D//SLC27A1
GO:0046324	regulation_of_glucose_import	Biological Process	3	55	314	17492	0.0760118	0.411019	1.11912	3.03856	0.00955414	APPL1//PLA2G1B//TERT
GO:0071398	cellular_response_to_fatty_acid	Biological Process	3	55	314	17492	0.0760118	0.411019	1.11912	3.03856	0.00955414	KCNK4//NFATC4//SMARCD1
GO:1990869	cellular_response_to_chemokine	Biological Process	4	89	314	17492	0.0762411	0.411019	1.11781	2.50369	0.0127389	CCL19//CCL24//CCR10//FOXC1
GO:0048729	tissue_morphogenesis	Biological Process	15	555	314	17492	0.0763518	0.411019	1.11718	1.50559	0.0477707	AIRE//ARTN//ASTN2//CTSZ//DEAF1//FOXC1//FOXD1//GDNF//LGR4//MATN4//MESP1//NFATC4//TCF15//TLX2//TMEFF2
GO:0046486	glycerolipid_metabolic_process	Biological Process	11	375	314	17492	0.0765011	0.411019	1.11633	1.63407	0.0350318	CHAT//CPNE6//CPNE7//IPMK//MOGAT3//PLA2G1B//PLA2G2D//PLA2G4D//SEL1L//SLC27A1//SLC27A5
GO:0046434	organophosphate_catabolic_process	Biological Process	5	126	314	17492	0.076845	0.411019	1.11438	2.2106	0.0159236	ENTPD2//NUDT18//PDE4C//PDE7A//PLA2G4D
GO:0070201	regulation_of_establishment_of_protein_localization	Biological Process	19	742	314	17492	0.0769389	0.411019	1.11385	1.42646	0.0605096	ADRA2C//CACNA1C//CASP8//CCL19//DRD2//EMD//GOLPH3//HMHB1//LGR4//MAPK11//NLGN2//PARD6A//PLA2G1B//PPP3R1//PRNP//REST//SFN//SLC16A1//TNFRSF4
GO:0009653	anatomical_structure_morphogenesis	Biological Process	47	2128	314	17492	0.0769731	0.411019	1.11366	1.23037	0.149682	ADAM12//AIRE//ALCAM//ARHGEF15//ARTN//ASH1L//ASTN2//BAX//C12orf57//CACNA1C//CACNA1H//CHRNB2//COL4A2//COL9A1//CTSZ//DEAF1//DRD2//DSPP//FOXC1//FOXD1//FOXD3//FOXS1//FSCN2//GDNF//GNAO1//GPC1//IL7R//JUN//LGR4//MATN4//MDFI//MESP1//NEK8//NFATC4//PAX4//PAX6//PAX9//PITX3//PLXNA3//RCAN3//SHANK1//SSH1//STX2//TCF15//TLX2//TMEFF2//TNR
GO:0051222	positive_regulation_of_protein_transport	Biological Process	12	420	314	17492	0.0772131	0.411019	1.11231	1.59163	0.0382166	CCL19//DRD2//EMD//GOLPH3//HMHB1//MAPK11//NLGN2//PARD6A//PLA2G1B//PRNP//SFN//TNFRSF4
GO:0009966	regulation_of_signal_transduction	Biological Process	66	3112	314	17492	0.0777673	0.411019	1.1092	1.18145	0.210191	ADRA2C//APPL1//ARHGEF15//ASH1L//ATF6B//AVP//BAX//CASP8//CCL19//CCL24//CD226//CHAC1//CHCHD10//CNIH2//CSH2//DAPK3//DDT//DRD2//DUSP9//EMD//FOXD1//GDF1//GDNF//GH2//GOLPH3//GPC1//GPC2//GPHB5//IAPP//IFNA4//IL7R//IQGAP3//JUN//LGR4//MAP3K10//MAPK11//MDFI//MESP1//MPP7//NEK8//NENF//NEUROD2//NFATC4//NLGN2//PBLD//PLA2G1B//PMEPA1//PPP3R1//PRNP//RCAN3//RHO//SCRT2//SFN//SHANK1//SPATA13//SSH1//SYNJ2BP//TAF15//TA…
GO:0042775	mitochondrial_ATP_synthesis_coupled_electron_transport	Biological Process	4	90	314	17492	0.0787172	0.411019	1.10393	2.47587	0.0127389	COX5A//COX6B1//COX8A//NDUFB10
GO:0099173	postsynapse_organization	Biological Process	4	90	314	17492	0.0787172	0.411019	1.10393	2.47587	0.0127389	GDNF//NLGN2//PRNP//SHANK1
GO:0007026	negative_regulation_of_microtubule_depolymerization	Biological Process	2	26	314	17492	0.0787322	0.411019	1.10385	4.28515	0.00636943	SPEF1//TAOK1
GO:0032897	negative_regulation_of_viral_transcription	Biological Process	2	26	314	17492	0.0787322	0.411019	1.10385	4.28515	0.00636943	JUN//REST
GO:0042738	exogenous_drug_catabolic_process	Biological Process	2	26	314	17492	0.0787322	0.411019	1.10385	4.28515	0.00636943	CYP1A2//CYP2B6
GO:0071875	adrenergic_receptor_signaling_pathway	Biological Process	2	26	314	17492	0.0787322	0.411019	1.10385	4.28515	0.00636943	ADRA2C//DRD2
GO:1902473	regulation_of_protein_localization_to_synapse	Biological Process	2	26	314	17492	0.0787322	0.411019	1.10385	4.28515	0.00636943	CNIH2//NLGN2
GO:0046649	lymphocyte_activation	Biological Process	11	377	314	17492	0.0787358	0.411019	1.10383	1.6254	0.0350318	AIRE//BAX//CASP8//CCL19//CHRNA4//CHRNB2//IFNA4//IL7R//NCAPH2//PLA2G2D//TNFRSF4
GO:0031328	positive_regulation_of_cellular_biosynthetic_process	Biological Process	44	1979	314	17492	0.0788028	0.411019	1.10346	1.23856	0.140127	AHR//AIRE//APPL1//ASH1L//ATF6B//AVP//CASZ1//CCL19//CHCHD10//DEAF1//DRD2//DUOXA2//FOXC1//FOXD1//FOXD3//GDNF//HIST1H1D//HIST1H1E//JMJD4//JUN//LGR4//MAFA//MAPK15//MESP1//MTF2//NEUROD2//NFATC4//PAX6//PAX9//PITX3//PLA2G1B//PPP3R1//REST//SIX5//SLC27A1//SMARCD1//TAF15//TCF15//TERT//TLX2//TNNI2//UBE2V1//ZNF292//ZNF609
GO:0032990	cell_part_morphogenesis	Biological Process	14	512	314	17492	0.0789216	0.411019	1.1028	1.52324	0.044586	ALCAM//ARTN//BAX//C12orf57//CHRNB2//DRD2//FOXD1//GDNF//GPC1//PAX6//PLXNA3//SHANK1//TMEFF2//TNR
GO:0002763	positive_regulation_of_myeloid_leukocyte_differentiation	Biological Process	3	56	314	17492	0.079295	0.411019	1.10075	2.9843	0.00955414	ACIN1//CASP8//JUN
GO:0050922	negative_regulation_of_chemotaxis	Biological Process	3	56	314	17492	0.079295	0.411019	1.10075	2.9843	0.00955414	DDT//PLXNA3//SEMA6B
GO:0043408	regulation_of_MAPK_cascade	Biological Process	19	745	314	17492	0.079297	0.411019	1.10074	1.42072	0.0605096	ADRA2C//ASH1L//CCL19//CCL24//DDT//DRD2//DUSP9//GDF1//IAPP//IQGAP3//JUN//MAP3K10//MAPK11//NENF//PLA2G1B//SYNJ2BP//TAOK1//UBE2V1//WDR54
GO:0050678	regulation_of_epithelial_cell_proliferation	Biological Process	10	334	314	17492	0.0797746	0.411019	1.09814	1.66787	0.0318471	AGTR1//BAX//CCL24//DEAF1//IQGAP3//JUN//PAX6//PBLD//SFN//SYNJ2BP
GO:0002793	positive_regulation_of_peptide_secretion	Biological Process	9	291	314	17492	0.0801008	0.411019	1.09636	1.7229	0.0286624	CCL19//DRD2//GOLPH3//HMHB1//MAPK11//NLGN2//PARD6A//PLA2G1B//TNFRSF4
GO:0007188	adenylate_cyclase-modulating_G_protein-coupled_receptor_signaling_pathway	Biological Process	7	207	314	17492	0.0801632	0.411019	1.09602	1.88381	0.022293	ADRA2C//DRD2//GNAO1//GPHB5//GPR78//IAPP//LGR4
GO:0010467	gene_expression	Biological Process	44	1982	314	17492	0.0802834	0.411019	1.09537	1.23668	0.140127	AANAT//ACIN1//ADAD2//AHR//ALKBH8//APH1A//ASH1L//ATF6B//BAX//C12orf65//CASP8//CDKAL1//CISD3//COL4A2//CRCP//CSDC2//CTSZ//DEAF1//DUOXA2//GATC//GGT5//GOLPH3//INTS1//JUN//MRPL52//MRPL55//MRPS12//NFATC4//NPM3//NUP43//PAX6//PCSK4//POLR2J2//PRPF19//RPL36//RPS13//SYMPK//TAF15//TAF3//TERT//TMEM208//UTP23//ZC3H7B//ZNF345
GO:0042773	ATP_synthesis_coupled_electron_transport	Biological Process	4	91	314	17492	0.0812331	0.411019	1.09027	2.44866	0.0127389	COX5A//COX6B1//COX8A//NDUFB10
GO:1903508	positive_regulation_of_nucleic_acid-templated_transcription	Biological Process	37	1631	314	17492	0.0818949	0.411019	1.08674	1.26374	0.117834	AHR//AIRE//ASH1L//ATF6B//CASZ1//CHCHD10//DEAF1//DRD2//FOXC1//FOXD1//FOXD3//GDNF//HIST1H1D//HIST1H1E//JUN//LGR4//MAFA//MESP1//MTF2//NEUROD2//NFATC4//PAX6//PAX9//PITX3//PLA2G1B//PPP3R1//REST//SIX5//SMARCD1//TAF15//TCF15//TERT//TLX2//TNNI2//UBE2V1//ZNF292//ZNF609
GO:0060341	regulation_of_cellular_localization	Biological Process	20	796	314	17492	0.0820962	0.411019	1.08568	1.39967	0.0636943	APPL1//ASTN2//BAX//CACNA1C//CASP8//CNIH2//EMD//GPC1//GPC2//MAD1L1//MAPK15//MARK4//NLGN2//PARD6A//PLA2G1B//PPP3R1//PRNP//SFN//SSH1//TERT
GO:0030334	regulation_of_cell_migration	Biological Process	21	844	314	17492	0.082283	0.411019	1.08469	1.38607	0.066879	AIRE//APPL1//CCL19//CCL24//DAPK3//DDT//DRD2//JUN//LAMA4//MAPK15//PAX6//PBLD//PLXNA3//SCRT2//SEMA6B//SPATA13//SSH1//SYNJ2BP//TERT//TMEFF2//ZNF609
GO:1902680	positive_regulation_of_RNA_biosynthetic_process	Biological Process	37	1632	314	17492	0.0824484	0.411019	1.08382	1.26297	0.117834	AHR//AIRE//ASH1L//ATF6B//CASZ1//CHCHD10//DEAF1//DRD2//FOXC1//FOXD1//FOXD3//GDNF//HIST1H1D//HIST1H1E//JUN//LGR4//MAFA//MESP1//MTF2//NEUROD2//NFATC4//PAX6//PAX9//PITX3//PLA2G1B//PPP3R1//REST//SIX5//SMARCD1//TAF15//TCF15//TERT//TLX2//TNNI2//UBE2V1//ZNF292//ZNF609
GO:0051270	regulation_of_cellular_component_movement	Biological Process	24	989	314	17492	0.0825796	0.411019	1.08313	1.35184	0.0764331	AIRE//APPL1//CACNA1C//CCL19//CCL24//CNIH2//DAPK3//DDT//DRD2//DUOXA2//JUN//LAMA4//MAPK15//PAX6//PBLD//PLXNA3//SCRT2//SEMA6B//SPATA13//SSH1//SYNJ2BP//TERT//TMEFF2//ZNF609
GO:0008637	apoptotic_mitochondrial_changes	Biological Process	3	57	314	17492	0.0826391	0.411019	1.08281	2.93195	0.00955414	BAX//JUN//SFN
GO:0001932	regulation_of_protein_phosphorylation	Biological Process	33	1433	314	17492	0.0831928	0.411019	1.07991	1.28285	0.105096	ADRA2C//ASH1L//AVP//BAX//CCL19//CCL24//CSH2//DDT//DRD2//DUSP9//GDF1//GH2//IAPP//IFNA4//IQGAP3//JUN//MAP3K10//MAPK11//NENF//PAK4//PARD6A//PAX6//PBLD//PLA2G1B//PMEPA1//PRNP//SFN//SLC27A1//SYNJ2BP//TAOK1//UBE2V1//VPS25//WDR54
GO:0045639	positive_regulation_of_myeloid_cell_differentiation	Biological Process	4	92	314	17492	0.0837883	0.411019	1.07682	2.42204	0.0127389	ACIN1//CASP8//JUN//MAPK11
GO:0006699	bile_acid_biosynthetic_process	Biological Process	2	27	314	17492	0.0840561	0.411019	1.07543	4.12644	0.00636943	HSD3B7//SLC27A5
GO:0032770	positive_regulation_of_monooxygenase_activity	Biological Process	2	27	314	17492	0.0840561	0.411019	1.07543	4.12644	0.00636943	GDNF//TERT
GO:0060706	cell_differentiation_involved_in_embryonic_placenta_development	Biological Process	2	27	314	17492	0.0840561	0.411019	1.07543	4.12644	0.00636943	CASP8//MDFI
GO:0070423	nucleotide-binding_oligomerization_domain_containing_signaling_pathway	Biological Process	2	27	314	17492	0.0840561	0.411019	1.07543	4.12644	0.00636943	CASP8//UBE2V1
GO:0003012	muscle_system_process	Biological Process	9	294	314	17492	0.0840955	0.411019	1.07523	1.70532	0.0286624	CACNA1C//CACNA1H//CHRNB2//DRD2//EMD//GDNF//GNAO1//SGCA//TNNI2
GO:0051100	negative_regulation_of_binding	Biological Process	6	169	314	17492	0.0845316	0.411019	1.07298	1.97776	0.0191083	BAX//CTSZ//JUN//MDFI//NFATC4//SYMPK
GO:0045892	negative_regulation_of_transcription,_DNA-templated	Biological Process	28	1189	314	17492	0.085609	0.411019	1.06748	1.31186	0.089172	AHR//ASCL5//DEAF1//FOXC1//FOXD1//FOXD3//FOXS1//GFI1B//HIST1H1D//HIST1H1E//HMX1//JUN//LGR4//MAP3K10//MDFI//MESP1//MTF2//NFATC4//PAX6//PAX9//REST//SCRT2//SET//SIX5//TAF3//TNFRSF4//ZNF157//ZNF345
GO:0006626	protein_targeting_to_mitochondrion	Biological Process	3	58	314	17492	0.0860429	0.411019	1.06529	2.8814	0.00955414	ROMO1//TIMM9//TOMM20
GO:0019229	regulation_of_vasoconstriction	Biological Process	3	58	314	17492	0.0860429	0.411019	1.06529	2.8814	0.00955414	ADRA2C//AGTR1//AVP
GO:0071806	protein_transmembrane_transport	Biological Process	3	58	314	17492	0.0860429	0.411019	1.06529	2.8814	0.00955414	ROMO1//TOMM20//ZFAND2B
GO:0009890	negative_regulation_of_biosynthetic_process	Biological Process	35	1540	314	17492	0.0873195	0.413308	1.05889	1.26607	0.111465	AHR//ASCL5//DAPK3//DEAF1//FOXC1//FOXD1//FOXD3//FOXS1//GFI1B//HIST1H1D//HIST1H1E//HMX1//JUN//LGR4//MAP3K10//MDFI//MESP1//MTF2//NEUROD2//NFATC4//ORMDL2//PAX6//PAX9//PLEKHN1//REST//SCRT2//SET//SIX5//SLC27A1//SOX3//TAF3//TMEFF2//TNFRSF4//ZNF157//ZNF345
GO:1902904	negative_regulation_of_supramolecular_fiber_organization	Biological Process	5	131	314	17492	0.0873237	0.413308	1.05887	2.12622	0.0159236	IAPP//SHANK1//SPEF1//TAOK1//TMEFF2
GO:0009888	tissue_development	Biological Process	39	1744	314	17492	0.0886641	0.417195	1.05225	1.24574	0.124204	AIRE//ARTN//ASH1L//ASTN2//COL4A2//CTSZ//DEAF1//DSPP//EMD//FN3K//FOXC1//FOXD1//FOXN2//GDNF//JUN//KRT9//KRTAP1-3//KRTAP10-10//KRTAP19-1//KRTAP5-9//KRTAP8-1//LCE1F//LCE2A//LCE2C//LGR4//MATN4//MESP1//NFATC4//ORAI1//PAX6//PAX9//PRNP//SEMA6B//SFN//SGCA//STX2//TCF15//TLX2//TMEFF2
GO:0001508	action_potential	Biological Process	4	94	314	17492	0.0890157	0.417195	1.05053	2.37051	0.0127389	CACNA1C//CACNA1H//CHRNA4//CHRNB2
GO:0003073	regulation_of_systemic_arterial_blood_pressure	Biological Process	4	94	314	17492	0.0890157	0.417195	1.05053	2.37051	0.0127389	AGTR1//AVP//CTSZ//DRD2
GO:0051651	maintenance_of_location_in_cell	Biological Process	4	94	314	17492	0.0890157	0.417195	1.05053	2.37051	0.0127389	GOLPH3//GRIK5//SHANK1//TAF3
GO:0031175	neuron_projection_development	Biological Process	17	662	314	17492	0.0890236	0.417195	1.05049	1.43054	0.0541401	ALCAM//ARTN//C12orf57//CHRNB2//DRD2//FOXD1//GDNF//GNAO1//GPC1//JUN//PAK4//PAX6//PLXNA3//SHANK1//STRN//TMEFF2//TNR
[truncated: 36 more rows]

## Sheet: up. CC_result
ID	Term	Ontology	Count	Size	numInt	numTotal	p_value	fdr	Enrichment_Score	Fold_Enrichment	GeneRatio	Genes
[truncated: 56 more rows]

[truncated: 3 more sheets: up. MF_result, down.KEGG, up. KEGG]
