# Supplementary material for: Comprehensive analysis of circRNA expression profiles and circRNA-associated competing endogenous RNA networks in IgA nephropathy
Source: PeerJ. 2020 Dec 3;8:e10395. doi: 10.7717/peerj.10395 (PMC7719294; doi:10.7717/peerj.10395)
Supplement: Supplemental Information 7 [file peerj-08-10395-s007.xlsx]

## Sheet: Sheet1
accession	circBase ID	miRNA	Target_Gene
circRNA10560	hsa_circ_0062003	hsa-miR-193a-5p	NUP210
circRNA11022	novel_circ	hsa-miR-193a-5p	NUP210
circRNA11806	hsa_circ_0066719	hsa-miR-193a-5p	NUP210
circRNA12492	novel_circ	hsa-miR-193a-5p	NUP210
circRNA1416	hsa_circ_0045092	hsa-miR-193a-5p	NUP210
circRNA2950	hsa_circ_0073237	hsa-miR-193a-5p	NUP210
circRNA2136	hsa_circ_0002077	hsa-miR-22-3p	C5orf24
circRNA2136	novel_circ	hsa-miR-22-3p	PPM1K
circRNA2136	novel_circ	hsa-miR-22-3p	BRWD3
circRNA2136	novel_circ	hsa-miR-22-3p	EPB41L2
circRNA2136	novel_circ	hsa-miR-22-3p	RGS2
circRNA2136	novel_circ	hsa-miR-22-3p	WRNIP1
circRNA2136	novel_circ	hsa-miR-22-3p	COPS7B
circRNA2136	novel_circ	hsa-miR-22-3p	RIC8B
circRNA2136	novel_circ	hsa-miR-22-3p	ZNF609
circRNA2950	hsa_circ_0073237	hsa-miR-584-5p	SRP72
circRNA2950	novel_circ	hsa-miR-584-5p	C12orf65
circRNA2950	novel_circ	hsa-miR-601	ACBD5
circRNA2512	hsa_circ_0082096	hsa-miR-623	FOXN2
circRNA2512	novel_circ	hsa-miR-623	TMEM134
circRNA2512	novel_circ	hsa-miR-623	FOXC1
circRNA2512	novel_circ	hsa-miR-623	SVIL
circRNA2512	novel_circ	hsa-miR-623	NUPL2
circRNA2512	novel_circ	hsa-miR-623	ATF6B
circRNA3239	hsa_circ_0070562	hsa-miR-623	FOXN2
circRNA3239	novel_circ	hsa-miR-623	TMEM134
circRNA3239	novel_circ	hsa-miR-623	FOXC1
circRNA3239	novel_circ	hsa-miR-623	SVIL
circRNA3239	novel_circ	hsa-miR-623	NUPL2
circRNA3239	novel_circ	hsa-miR-623	ATF6B
circRNA10812	hsa_circ_0082689	hsa-miR-650	C7
circRNA10812	novel_circ	hsa-miR-650	BCAS4
circRNA10812	novel_circ	hsa-miR-650	ATP6V0E1
circRNA10812	novel_circ	hsa-miR-650	SIX5
circRNA10812	novel_circ	hsa-miR-650	CNP
circRNA10812	novel_circ	hsa-miR-650	CPNE6
circRNA10812	novel_circ	hsa-miR-650	CSDC2
circRNA10812	novel_circ	hsa-miR-650	RASSF2
circRNA10812	novel_circ	hsa-miR-650	SNAP23
circRNA10812	novel_circ	hsa-miR-650	SLC27A1
circRNA11806	hsa_circ_0066719	hsa-miR-650	C7
circRNA11806	novel_circ	hsa-miR-650	BCAS4
circRNA11806	novel_circ	hsa-miR-650	ATP6V0E1
circRNA11806	novel_circ	hsa-miR-650	SIX5
circRNA11806	novel_circ	hsa-miR-650	CNP
circRNA11806	novel_circ	hsa-miR-650	CPNE6
circRNA11806	novel_circ	hsa-miR-650	CSDC2
circRNA11806	novel_circ	hsa-miR-650	RASSF2
circRNA11806	novel_circ	hsa-miR-650	SNAP23
circRNA11806	novel_circ	hsa-miR-650	SLC27A1
circRNA188	hsa_circ_0005783	hsa-miR-650	C7
circRNA188	novel_circ	hsa-miR-650	BCAS4
circRNA188	novel_circ	hsa-miR-650	ATP6V0E1
circRNA188	novel_circ	hsa-miR-650	SIX5
circRNA188	novel_circ	hsa-miR-650	CNP
circRNA188	novel_circ	hsa-miR-650	CPNE6
circRNA188	novel_circ	hsa-miR-650	CSDC2
circRNA188	novel_circ	hsa-miR-650	RASSF2
circRNA188	novel_circ	hsa-miR-650	SNAP23
circRNA188	novel_circ	hsa-miR-650	SLC27A1
circRNA3195	hsa_circ_0007883	hsa-miR-650	C7
circRNA3195	novel_circ	hsa-miR-650	BCAS4
circRNA3195	novel_circ	hsa-miR-650	ATP6V0E1
circRNA3195	novel_circ	hsa-miR-650	SIX5
circRNA3195	novel_circ	hsa-miR-650	CNP
circRNA3195	novel_circ	hsa-miR-650	CPNE6
circRNA3195	novel_circ	hsa-miR-650	CSDC2
circRNA3195	novel_circ	hsa-miR-650	RASSF2
circRNA3195	novel_circ	hsa-miR-650	SNAP23
circRNA3195	novel_circ	hsa-miR-650	SLC27A1
circRNA3997	hsa_circ_0004305	hsa-miR-650	C7
circRNA3997	novel_circ	hsa-miR-650	BCAS4
circRNA3997	novel_circ	hsa-miR-650	ATP6V0E1
circRNA3997	novel_circ	hsa-miR-650	SIX5
circRNA3997	novel_circ	hsa-miR-650	CNP
circRNA3997	novel_circ	hsa-miR-650	CPNE6
circRNA3997	novel_circ	hsa-miR-650	CSDC2
circRNA3997	novel_circ	hsa-miR-650	RASSF2
circRNA3997	novel_circ	hsa-miR-650	SNAP23
circRNA3997	novel_circ	hsa-miR-650	SLC27A1
circRNA10560	hsa_circ_0062003	hsa-miR-654-5p	STK38
circRNA10560	novel_circ	hsa-miR-654-5p	EDAR
circRNA10560	novel_circ	hsa-miR-654-5p	BAZ1B
circRNA10560	novel_circ	hsa-miR-654-5p	GH2
circRNA10560	novel_circ	hsa-miR-654-5p	ERGIC1
circRNA10560	novel_circ	hsa-miR-654-5p	CNIH2
circRNA10560	novel_circ	hsa-miR-654-5p	HLA-B
circRNA11022	novel_circ	hsa-miR-654-5p	STK38
circRNA11022	novel_circ	hsa-miR-654-5p	EDAR
circRNA11022	novel_circ	hsa-miR-654-5p	BAZ1B
circRNA11022	novel_circ	hsa-miR-654-5p	GH2
circRNA11022	novel_circ	hsa-miR-654-5p	ERGIC1
circRNA11022	novel_circ	hsa-miR-654-5p	CNIH2
circRNA11022	novel_circ	hsa-miR-654-5p	HLA-B
circRNA2512	hsa_circ_0082096	hsa-miR-654-5p	STK38
circRNA2512	novel_circ	hsa-miR-654-5p	EDAR
circRNA2512	novel_circ	hsa-miR-654-5p	BAZ1B
circRNA2512	novel_circ	hsa-miR-654-5p	GH2
circRNA2512	novel_circ	hsa-miR-654-5p	ERGIC1
circRNA2512	novel_circ	hsa-miR-654-5p	CNIH2
circRNA2512	novel_circ	hsa-miR-654-5p	HLA-B
circRNA11806	hsa_circ_0066719	hsa-miR-671-5p	KRT9
circRNA11806	novel_circ	hsa-miR-671-5p	C9orf78
circRNA11806	novel_circ	hsa-miR-671-5p	CBX4
circRNA11806	novel_circ	hsa-miR-671-5p	FAM57B
circRNA11806	novel_circ	hsa-miR-671-5p	TRIM21
circRNA11806	novel_circ	hsa-miR-671-5p	DAPK3
circRNA11806	novel_circ	hsa-miR-671-5p	CPNE2
circRNA11806	novel_circ	hsa-miR-671-5p	R3HDM2
circRNA11806	novel_circ	hsa-miR-671-5p	TMEM151A
circRNA11806	novel_circ	hsa-miR-671-5p	CRTC3
circRNA2950	hsa_circ_0073237	hsa-miR-760	HIST1H2AE
circRNA2950	novel_circ	hsa-miR-760	SEC24C
circRNA2950	novel_circ	hsa-miR-760	CYB5B
circRNA2950	novel_circ	hsa-miR-760	HIST1H1E
circRNA3239	novel_circ	hsa-miR-760	HIST1H2AE
circRNA3239	novel_circ	hsa-miR-760	SEC24C
circRNA3239	novel_circ	hsa-miR-760	CYB5B
circRNA3239	novel_circ	hsa-miR-760	HIST1H1E
circRNA5877	novel_circ	hsa-miR-760	HIST1H2AE
circRNA5877	novel_circ	hsa-miR-760	SEC24C
circRNA5877	novel_circ	hsa-miR-760	CYB5B
circRNA5877	novel_circ	hsa-miR-760	HIST1H1E
circRNA11806	hsa_circ_0066719	hsa-miR-765	PDE6D
circRNA11806	novel_circ	hsa-miR-765	ASB16
circRNA11806	novel_circ	hsa-miR-765	STK40
circRNA11806	novel_circ	hsa-miR-765	VPS25
circRNA11806	novel_circ	hsa-miR-765	ELK1
circRNA11806	novel_circ	hsa-miR-765	ARAF
circRNA11806	novel_circ	hsa-miR-765	ZNF710
circRNA11806	novel_circ	hsa-miR-765	PTK2B
circRNA11806	novel_circ	hsa-miR-765	PCDHGA9
circRNA11806	novel_circ	hsa-miR-765	EXTL2
circRNA11806	novel_circ	hsa-miR-765	TPD52L2
circRNA11806	novel_circ	hsa-miR-765	CHAC1
circRNA11806	novel_circ	hsa-miR-765	UBE2V1
circRNA11806	novel_circ	hsa-miR-765	BAZ2A
circRNA11806	novel_circ	hsa-miR-765	PLA2G4D
circRNA11806	novel_circ	hsa-miR-765	SNURF
circRNA11806	novel_circ	hsa-miR-765	GALNT2
circRNA11806	novel_circ	hsa-miR-765	AP2M1
circRNA11806	novel_circ	hsa-miR-765	CPNE2
circRNA11806	novel_circ	hsa-miR-765	SLC4A2
circRNA2950	hsa_circ_0073237	hsa-miR-765	PDE6D
circRNA2950	novel_circ	hsa-miR-765	ASB16
circRNA2950	novel_circ	hsa-miR-765	STK40
circRNA2950	novel_circ	hsa-miR-765	VPS25
circRNA2950	novel_circ	hsa-miR-765	ELK1
circRNA2950	novel_circ	hsa-miR-765	ARAF
circRNA2950	novel_circ	hsa-miR-765	ZNF710
circRNA2950	novel_circ	hsa-miR-765	PTK2B
circRNA2950	novel_circ	hsa-miR-765	PCDHGA9
circRNA2950	novel_circ	hsa-miR-765	EXTL2
circRNA2950	novel_circ	hsa-miR-765	TPD52L2
circRNA2950	novel_circ	hsa-miR-765	CHAC1
circRNA2950	novel_circ	hsa-miR-765	UBE2V1
circRNA2950	novel_circ	hsa-miR-765	BAZ2A
circRNA2950	novel_circ	hsa-miR-765	PLA2G4D
circRNA2950	novel_circ	hsa-miR-765	SNURF
circRNA2950	novel_circ	hsa-miR-765	GALNT2
circRNA2950	novel_circ	hsa-miR-765	AP2M1
circRNA2950	novel_circ	hsa-miR-765	CPNE2
circRNA2950	novel_circ	hsa-miR-765	SLC4A2
circRNA3239	hsa_circ_0070562	hsa-miR-765	PDE6D
circRNA3239	novel_circ	hsa-miR-765	ASB16
circRNA3239	novel_circ	hsa-miR-765	STK40
circRNA3239	novel_circ	hsa-miR-765	VPS25
circRNA3239	novel_circ	hsa-miR-765	ELK1
circRNA3239	novel_circ	hsa-miR-765	ARAF
circRNA3239	novel_circ	hsa-miR-765	ZNF710
circRNA3239	novel_circ	hsa-miR-765	PTK2B
circRNA3239	novel_circ	hsa-miR-765	PCDHGA9
circRNA3239	novel_circ	hsa-miR-765	EXTL2
circRNA3239	novel_circ	hsa-miR-765	TPD52L2
circRNA3239	novel_circ	hsa-miR-765	CHAC1
circRNA3239	novel_circ	hsa-miR-765	UBE2V1
circRNA3239	novel_circ	hsa-miR-765	BAZ2A
circRNA3239	novel_circ	hsa-miR-765	PLA2G4D
circRNA3239	novel_circ	hsa-miR-765	SNURF
circRNA3239	novel_circ	hsa-miR-765	GALNT2
circRNA3239	novel_circ	hsa-miR-765	AP2M1
circRNA3239	novel_circ	hsa-miR-765	CPNE2
circRNA3239	novel_circ	hsa-miR-765	SLC4A2
circRNA3302	novel_circ	hsa-miR-765	PDE6D
circRNA3302	novel_circ	hsa-miR-765	ASB16
circRNA3302	novel_circ	hsa-miR-765	STK40
circRNA3302	novel_circ	hsa-miR-765	VPS25
circRNA3302	novel_circ	hsa-miR-765	ELK1
circRNA3302	novel_circ	hsa-miR-765	ARAF
circRNA3302	novel_circ	hsa-miR-765	ZNF710
circRNA3302	novel_circ	hsa-miR-765	PTK2B
circRNA3302	novel_circ	hsa-miR-765	PCDHGA9
circRNA3302	novel_circ	hsa-miR-765	EXTL2
circRNA3302	novel_circ	hsa-miR-765	TPD52L2
circRNA3302	novel_circ	hsa-miR-765	CHAC1
circRNA3302	novel_circ	hsa-miR-765	UBE2V1
circRNA3302	novel_circ	hsa-miR-765	BAZ2A
circRNA3302	novel_circ	hsa-miR-765	PLA2G4D
circRNA3302	novel_circ	hsa-miR-765	SNURF
circRNA3302	novel_circ	hsa-miR-765	GALNT2
circRNA3302	novel_circ	hsa-miR-765	AP2M1
circRNA3302	novel_circ	hsa-miR-765	CPNE2
circRNA3302	novel_circ	hsa-miR-765	SLC4A2
circRNA4947	novel_circ	hsa-miR-93-3p	PKIG
circRNA4947	novel_circ	hsa-miR-93-3p	DAP
circRNA4947	novel_circ	hsa-miR-93-3p	CTSZ
circRNA4947	novel_circ	hsa-miR-93-3p	FER
circRNA5877	hsa_circ_0004658	hsa-miR-93-3p	PKIG
circRNA5877	novel_circ	hsa-miR-93-3p	DAP
circRNA5877	novel_circ	hsa-miR-93-3p	CTSZ
circRNA5877	novel_circ	hsa-miR-93-3p	FER
