# Supplementary material for: Comprehensive analysis of circRNA expression profiles and circRNA-associated competing endogenous RNA networks in IgA nephropathy
Source: PeerJ. 2020 Dec 3;8:e10395. doi: 10.7717/peerj.10395 (PMC7719294; doi:10.7717/peerj.10395)
Supplement: Supplemental Information 8 [file peerj-08-10395-s008.xlsx]

## Sheet: BP_result
ID	Term	Ontology	Count	Size	numInt	numTotal	p_value	fdr	Enrichment_Score	Fold_Enrichment	GeneRatio	Genes
GO:0051171	regulation_of_nitrogen_compound_metabolic_process	Biological Process	35	5787	62	17492	0.000126982	0.176492	3.89626	1.70633	0.564516	ARAF//ATF6B//BAZ1B//BAZ2A//BRWD3//C12orf65//C9orf78//CBX4//CHAC1//CRTC3//CSDC2//CTSZ//DAP//DAPK3//EDAR//ELK1//FER//FOXC1//FOXN2//GH2//HIST1H1E//NUP210//PKIG//PTK2B//RASSF2//RGS2//SIX5//SLC27A1//STK38//STK40//TRIM21//UBE2V1//VPS25//WRNIP1//ZNF609
GO:0006903	vesicle_targeting	Biological Process	4	91	62	17492	0.000303643	0.176492	3.51764	12.4013	0.0645161	CNIH2//CTSZ//SEC24C//SNAP23
GO:0006900	vesicle_budding_from_membrane	Biological Process	4	100	62	17492	0.000435029	0.176492	3.36148	11.2852	0.0645161	AP2M1//CNIH2//CTSZ//SEC24C
GO:0010468	regulation_of_gene_expression	Biological Process	28	4407	62	17492	0.000492308	0.176492	3.30776	1.79251	0.451613	ATF6B//BAZ1B//BAZ2A//BRWD3//C12orf65//C9orf78//CBX4//CHAC1//CRTC3//CSDC2//CTSZ//DAP//DAPK3//EDAR//ELK1//FER//FOXC1//FOXN2//HIST1H1E//NUP210//PKIG//PTK2B//RGS2//SIX5//STK40//TRIM21//UBE2V1//ZNF609
GO:0016050	vesicle_organization	Biological Process	6	303	62	17492	0.0007	0.20076	3.1549	5.58671	0.0967742	AP2M1//CNIH2//CTSZ//SEC24C//SNAP23//VPS25
GO:0042325	regulation_of_phosphorylation	Biological Process	14	1582	62	17492	0.00106219	0.211783	2.9738	2.49672	0.225806	ARAF//EDAR//FER//GH2//NUP210//PKIG//PTK2B//RASSF2//RGS2//SLC27A1//STK38//STK40//UBE2V1//VPS25
GO:0001932	regulation_of_protein_phosphorylation	Biological Process	13	1433	62	17492	0.00132179	0.211783	2.87884	2.55944	0.209677	ARAF//EDAR//FER//GH2//PKIG//PTK2B//RASSF2//RGS2//SLC27A1//STK38//STK40//UBE2V1//VPS25
GO:0032268	regulation_of_cellular_protein_metabolic_process	Biological Process	19	2643	62	17492	0.001477	0.211783	2.83062	2.02817	0.306452	ARAF//C12orf65//CHAC1//CTSZ//DAP//DAPK3//EDAR//FER//GH2//PKIG//PTK2B//RASSF2//RGS2//SLC27A1//STK38//STK40//TRIM21//UBE2V1//VPS25
GO:0048208	COPII_vesicle_coating	Biological Process	3	64	62	17492	0.00151471	0.211783	2.81967	13.2248	0.0483871	CNIH2//CTSZ//SEC24C
GO:0090114	COPII-coated_vesicle_budding	Biological Process	3	70	62	17492	0.00196031	0.211783	2.70767	12.0912	0.0483871	CNIH2//CTSZ//SEC24C
GO:0048199	vesicle_targeting,_to,_from_or_within_Golgi	Biological Process	3	71	62	17492	0.00204166	0.211783	2.69002	11.9209	0.0483871	CNIH2//CTSZ//SEC24C
GO:0007169	transmembrane_receptor_protein_tyrosine_kinase_signaling_pathway	Biological Process	7	512	62	17492	0.00216107	0.211783	2.66533	3.85723	0.112903	AP2M1//ATP6V0E1//FER//FOXC1//GH2//PTK2B//RASSF2
GO:0019221	cytokine-mediated_signaling_pathway	Biological Process	8	665	62	17492	0.00231051	0.211783	2.63629	3.39403	0.129032	EDAR//FER//FOXC1//HLA-B//PTK2B//SLC27A1//TRIM21//UBE2V1
GO:0048194	Golgi_vesicle_budding	Biological Process	3	78	62	17492	0.00267022	0.211783	2.57345	10.8511	0.0483871	CNIH2//CTSZ//SEC24C
GO:0044267	cellular_protein_metabolic_process	Biological Process	23	3693	62	17492	0.00282193	0.211783	2.54945	1.7571	0.370968	AP2M1//ARAF//ASB16//BAZ1B//BAZ2A//C12orf65//CBX4//COPS7B//CTSZ//DAPK3//EXTL2//FER//GALNT2//HIST1H1E//NUP210//PPM1K//PTK2B//RASSF2//STK38//STK40//TRIM21//UBE2V1//VPS25
GO:0043951	negative_regulation_of_cAMP-mediated_signaling	Biological Process	2	23	62	17492	0.00298097	0.211783	2.52564	24.533	0.0322581	CRTC3//RGS2
GO:0051246	regulation_of_protein_metabolic_process	Biological Process	19	2808	62	17492	0.00301934	0.211783	2.52009	1.90899	0.306452	ARAF//C12orf65//CHAC1//CTSZ//DAP//DAPK3//EDAR//FER//GH2//PKIG//PTK2B//RASSF2//RGS2//SLC27A1//STK38//STK40//TRIM21//UBE2V1//VPS25
GO:0051174	regulation_of_phosphorus_metabolic_process	Biological Process	14	1778	62	17492	0.00320879	0.211783	2.49366	2.22149	0.225806	ARAF//EDAR//FER//GH2//NUP210//PKIG//PTK2B//RASSF2//RGS2//SLC27A1//STK38//STK40//UBE2V1//VPS25
GO:0051650	establishment_of_vesicle_localization	Biological Process	4	179	62	17492	0.00372689	0.213774	2.42865	6.30456	0.0645161	CNIH2//CTSZ//SEC24C//SNAP23
GO:0051648	vesicle_localization	Biological Process	4	189	62	17492	0.00452034	0.238238	2.34483	5.97098	0.0645161	CNIH2//CTSZ//SEC24C//SNAP23
GO:0048002	antigen_processing_and_presentation_of_peptide_antigen	Biological Process	4	192	62	17492	0.00477893	0.238238	2.32067	5.87769	0.0645161	AP2M1//HLA-B//SEC24C//SNAP23
GO:0006658	phosphatidylserine_metabolic_process	Biological Process	2	31	62	17492	0.00538	0.238238	2.26922	18.2019	0.0322581	PLA2G4D//SLC27A1
GO:0038083	peptidyl-tyrosine_autophosphorylation	Biological Process	2	31	62	17492	0.00538	0.238238	2.26922	18.2019	0.0322581	FER//PTK2B
GO:0002474	antigen_processing_and_presentation_of_peptide_antigen_via_MHC_class_I	Biological Process	3	101	62	17492	0.00552179	0.238238	2.25792	8.38007	0.0483871	HLA-B//SEC24C//SNAP23
GO:0010955	negative_regulation_of_protein_processing	Biological Process	2	33	62	17492	0.0060812	0.238238	2.21601	17.0987	0.0322581	CHAC1//CTSZ
GO:0045859	regulation_of_protein_kinase_activity	Biological Process	8	784	62	17492	0.00624483	0.238238	2.20448	2.87887	0.129032	PKIG//PTK2B//RASSF2//RGS2//SLC27A1//STK38//UBE2V1//VPS25
GO:0006888	endoplasmic_reticulum_to_Golgi_vesicle-mediated_transport	Biological Process	4	208	62	17492	0.00632753	0.238238	2.19877	5.42556	0.0645161	CNIH2//CTSZ//ERGIC1//SEC24C
GO:2000310	regulation_of_NMDA_receptor_activity	Biological Process	2	35	62	17492	0.0068218	0.238238	2.1661	16.1217	0.0322581	CNIH2//PTK2B
GO:0006468	protein_phosphorylation	Biological Process	9	973	62	17492	0.00700224	0.238238	2.15476	2.60962	0.145161	ARAF//BAZ1B//DAPK3//FER//PTK2B//RASSF2//STK38//STK40//UBE2V1
GO:0019882	antigen_processing_and_presentation	Biological Process	4	218	62	17492	0.00744774	0.238238	2.12798	5.17668	0.0645161	AP2M1//HLA-B//SEC24C//SNAP23
GO:2000249	regulation_of_actin_cytoskeleton_reorganization	Biological Process	2	37	62	17492	0.00760123	0.238238	2.11912	15.2502	0.0322581	DAPK3//PTK2B
GO:0071345	cellular_response_to_cytokine_stimulus	Biological Process	9	996	62	17492	0.00811392	0.238238	2.09077	2.54936	0.145161	DAPK3//EDAR//FER//FOXC1//HLA-B//PTK2B//SLC27A1//TRIM21//UBE2V1
GO:0006469	negative_regulation_of_protein_kinase_activity	Biological Process	4	224	62	17492	0.00817901	0.238238	2.0873	5.03802	0.0645161	PKIG//RGS2//STK38//VPS25
GO:0006464	cellular_protein_modification_process	Biological Process	19	3075	62	17492	0.00831877	0.238238	2.07994	1.74324	0.306452	ARAF//ASB16//BAZ1B//BAZ2A//CBX4//COPS7B//DAPK3//EXTL2//FER//GALNT2//HIST1H1E//NUP210//PPM1K//PTK2B//RASSF2//STK38//STK40//TRIM21//UBE2V1
GO:0036211	protein_modification_process	Biological Process	19	3075	62	17492	0.00831877	0.238238	2.07994	1.74324	0.306452	ARAF//ASB16//BAZ1B//BAZ2A//CBX4//COPS7B//DAPK3//EXTL2//FER//GALNT2//HIST1H1E//NUP210//PPM1K//PTK2B//RASSF2//STK38//STK40//TRIM21//UBE2V1
GO:0071900	regulation_of_protein_serine|threonine_kinase_activity	Biological Process	6	510	62	17492	0.0092294	0.238238	2.03483	3.31917	0.0967742	PKIG//PTK2B//RGS2//SLC27A1//STK38//UBE2V1
GO:0006654	phosphatidic_acid_biosynthetic_process	Biological Process	2	41	62	17492	0.00927432	0.238238	2.03272	13.7624	0.0322581	PLA2G4D//SLC27A1
GO:0032269	negative_regulation_of_cellular_protein_metabolic_process	Biological Process	9	1024	62	17492	0.00964508	0.238238	2.01569	2.47965	0.145161	CHAC1//CTSZ//DAPK3//PKIG//RASSF2//RGS2//STK38//TRIM21//VPS25
GO:0046473	phosphatidic_acid_metabolic_process	Biological Process	2	42	62	17492	0.00971598	0.238238	2.01251	13.4347	0.0322581	PLA2G4D//SLC27A1
GO:0048193	Golgi_vesicle_transport	Biological Process	5	368	62	17492	0.00973693	0.238238	2.01158	3.83327	0.0806452	CNIH2//CTSZ//ERGIC1//SEC24C//SNAP23
GO:0006996	organelle_organization	Biological Process	20	3375	62	17492	0.010489	0.238238	1.97927	1.67188	0.322581	AP2M1//ATP6V0E1//BAZ1B//BAZ2A//BRWD3//CBX4//CNIH2//CNP//COPS7B//CTSZ//DAPK3//EPB41L2//FER//HIST1H1E//KRT9//PTK2B//SEC24C//SNAP23//SVIL//VPS25
GO:0035272	exocrine_system_development	Biological Process	2	44	62	17492	0.0106269	0.238238	1.97359	12.824	0.0322581	EDAR//FOXC1
GO:0060425	lung_morphogenesis	Biological Process	2	44	62	17492	0.0106269	0.238238	1.97359	12.824	0.0322581	CTSZ//STK40
GO:0043549	regulation_of_kinase_activity	Biological Process	8	862	62	17492	0.0107846	0.238238	1.9672	2.61837	0.129032	PKIG//PTK2B//RASSF2//RGS2//SLC27A1//STK38//UBE2V1//VPS25
GO:0033673	negative_regulation_of_kinase_activity	Biological Process	4	244	62	17492	0.0109533	0.238238	1.96046	4.62507	0.0645161	PKIG//RGS2//STK38//VPS25
GO:0043949	regulation_of_cAMP-mediated_signaling	Biological Process	2	45	62	17492	0.011096	0.238238	1.95483	12.5391	0.0322581	CRTC3//RGS2
GO:0071901	negative_regulation_of_protein_serine|threonine_kinase_activity	Biological Process	3	132	62	17492	0.0114897	0.238238	1.93969	6.41202	0.0483871	PKIG//RGS2//STK38
GO:0046849	bone_remodeling	Biological Process	2	46	62	17492	0.0115741	0.238238	1.93651	12.2665	0.0322581	PTK2B//RASSF2
GO:0018193	peptidyl-amino_acid_modification	Biological Process	8	876	62	17492	0.0118087	0.238238	1.9278	2.57652	0.129032	BAZ1B//CBX4//FER//GALNT2//HIST1H1E//NUP210//PTK2B//STK38
GO:0065003	protein-containing_complex_assembly	Biological Process	11	1449	62	17492	0.0121245	0.238238	1.91633	2.14177	0.177419	AP2M1//BAZ2A//CNIH2//COPS7B//CRTC3//CTSZ//HIST1H1E//PTK2B//SEC24C//SNAP23//TRIM21
GO:0007167	enzyme_linked_receptor_protein_signaling_pathway	Biological Process	7	714	62	17492	0.0128645	0.238238	1.89061	2.76597	0.112903	AP2M1//ATP6V0E1//FER//FOXC1//GH2//PTK2B//RASSF2
GO:0031324	negative_regulation_of_cellular_metabolic_process	Biological Process	16	2525	62	17492	0.0130282	0.238238	1.88512	1.78775	0.258065	BAZ2A//CBX4//CHAC1//CTSZ//DAP//DAPK3//FOXC1//HIST1H1E//PKIG//RASSF2//RGS2//SIX5//SLC27A1//STK38//TRIM21//VPS25
GO:0046330	positive_regulation_of_JNK_cascade	Biological Process	3	139	62	17492	0.0131998	0.238238	1.87943	6.08912	0.0483871	EDAR//PTK2B//RASSF2
GO:0080135	regulation_of_cellular_response_to_stress	Biological Process	7	721	62	17492	0.0135153	0.238238	1.86917	2.73912	0.112903	ATF6B//EDAR//NUP210//PTK2B//RASSF2//UBE2V1//WRNIP1
GO:0051091	positive_regulation_of_DNA-binding_transcription_factor_activity	Biological Process	4	260	62	17492	0.013565	0.238238	1.86758	4.34045	0.0645161	CRTC3//FER//TRIM21//UBE2V1
GO:0007173	epidermal_growth_factor_receptor_signaling_pathway	Biological Process	2	50	62	17492	0.0135753	0.238238	1.86725	11.2852	0.0322581	PTK2B//RASSF2
GO:0001933	negative_regulation_of_protein_phosphorylation	Biological Process	5	400	62	17492	0.0135899	0.238238	1.86678	3.52661	0.0806452	PKIG//RASSF2//RGS2//STK38//VPS25
GO:0034097	response_to_cytokine	Biological Process	9	1084	62	17492	0.0136601	0.238238	1.86455	2.3424	0.145161	DAPK3//EDAR//FER//FOXC1//HLA-B//PTK2B//SLC27A1//TRIM21//UBE2V1
GO:0051248	negative_regulation_of_protein_metabolic_process	Biological Process	9	1090	62	17492	0.0141215	0.238238	1.85012	2.32951	0.145161	CHAC1//CTSZ//DAPK3//PKIG//RASSF2//RGS2//STK38//TRIM21//VPS25
GO:0051592	response_to_calcium_ion	Biological Process	3	148	62	17492	0.0156015	0.259556	1.80683	5.71883	0.0483871	CPNE2//CPNE6//PTK2B
GO:0006796	phosphate-containing_compound_metabolic_process	Biological Process	14	2137	62	17492	0.0157917	0.259556	1.80157	1.8483	0.225806	ARAF//BAZ1B//CNP//CPNE6//DAPK3//FER//PLA2G4D//PPM1K//PTK2B//RASSF2//SLC27A1//STK38//STK40//UBE2V1
GO:0043408	regulation_of_MAPK_cascade	Biological Process	7	745	62	17492	0.0159281	0.259556	1.79784	2.65088	0.112903	EDAR//PTK2B//RASSF2//RGS2//STK38//STK40//UBE2V1
GO:0051090	regulation_of_DNA-binding_transcription_factor_activity	Biological Process	5	421	62	17492	0.0166144	0.265655	1.77951	3.3507	0.0806452	CRTC3//DAP//FER//TRIM21//UBE2V1
GO:0019538	protein_metabolic_process	Biological Process	23	4267	62	17492	0.0173794	0.265655	1.75997	1.52073	0.370968	AP2M1//ARAF//ASB16//BAZ1B//BAZ2A//C12orf65//CBX4//COPS7B//CTSZ//DAPK3//EXTL2//FER//GALNT2//HIST1H1E//NUP210//PPM1K//PTK2B//RASSF2//STK38//STK40//TRIM21//UBE2V1//VPS25
GO:0008360	regulation_of_cell_shape	Biological Process	3	156	62	17492	0.0179302	0.267832	1.74641	5.42556	0.0483871	BRWD3//DAPK3//PTK2B
GO:0018108	peptidyl-tyrosine_phosphorylation	Biological Process	3	157	62	17492	0.0182342	0.269565	1.73911	5.391	0.0483871	BAZ1B//FER//PTK2B
GO:0032387	negative_regulation_of_intracellular_transport	Biological Process	2	60	62	17492	0.0191767	0.27015	1.71723	9.4043	0.0322581	CNIH2//PKIG
GO:0007517	muscle_organ_development	Biological Process	4	289	62	17492	0.0192466	0.27015	1.71565	3.9049	0.0645161	FOXC1//FOXN2//SVIL//ZNF609
GO:0042326	negative_regulation_of_phosphorylation	Biological Process	5	438	62	17492	0.0193699	0.27015	1.71287	3.22065	0.0806452	PKIG//RASSF2//RGS2//STK38//VPS25
GO:0071346	cellular_response_to_interferon-gamma	Biological Process	3	163	62	17492	0.0201185	0.27015	1.6964	5.19256	0.0483871	DAPK3//HLA-B//TRIM21
GO:0006940	regulation_of_smooth_muscle_contraction	Biological Process	2	62	62	17492	0.0203954	0.27015	1.69047	9.10094	0.0322581	DAPK3//RGS2
GO:0006986	response_to_unfolded_protein	Biological Process	3	164	62	17492	0.0204426	0.27015	1.68946	5.1609	0.0483871	ATF6B//CHAC1//EXTL2
GO:0045815	positive_regulation_of_gene_expression,_epigenetic	Biological Process	2	63	62	17492	0.0210166	0.27015	1.67744	8.95648	0.0322581	BAZ1B//HIST1H1E
GO:1900449	regulation_of_glutamate_receptor_signaling_pathway	Biological Process	2	63	62	17492	0.0210166	0.27015	1.67744	8.95648	0.0322581	CNIH2//PTK2B
GO:0032874	positive_regulation_of_stress-activated_MAPK_cascade	Biological Process	3	166	62	17492	0.0210996	0.27015	1.67573	5.09872	0.0483871	EDAR//PTK2B//RASSF2
GO:0070304	positive_regulation_of_stress-activated_protein_kinase_signaling_cascade	Biological Process	3	168	62	17492	0.021768	0.276242	1.66218	5.03802	0.0483871	EDAR//PTK2B//RASSF2
GO:0016925	protein_sumoylation	Biological Process	2	65	62	17492	0.0222826	0.279439	1.65203	8.68089	0.0322581	CBX4//NUP210
GO:0048010	vascular_endothelial_growth_factor_receptor_signaling_pathway	Biological Process	2	67	62	17492	0.0235795	0.279439	1.62747	8.42176	0.0322581	FOXC1//PTK2B
GO:0070613	regulation_of_protein_processing	Biological Process	2	67	62	17492	0.0235795	0.279439	1.62747	8.42176	0.0322581	CHAC1//CTSZ
GO:0038127	ERBB_signaling_pathway	Biological Process	2	70	62	17492	0.0255817	0.282788	1.59207	8.06083	0.0322581	PTK2B//RASSF2
GO:0010469	regulation_of_signaling_receptor_activity	Biological Process	3	180	62	17492	0.0260215	0.282788	1.58467	4.70215	0.0483871	CNIH2//PTK2B//VPS25
GO:0007154	cell_communication	Biological Process	27	5449	62	17492	0.026474	0.282788	1.57718	1.39796	0.435484	AP2M1//ARAF//ASB16//ATF6B//ATP6V0E1//CHAC1//CNIH2//CNP//CPNE6//DAP//DAPK3//EDAR//EXTL2//FER//FOXC1//GH2//HLA-B//PKIG//PTK2B//RASSF2//RGS2//RIC8B//SLC27A1//SNAP23//STK38//TRIM21//UBE2V1
GO:0010033	response_to_organic_substance	Biological Process	17	2973	62	17492	0.0267013	0.282788	1.57347	1.61325	0.274194	ATF6B//ATP6V0E1//CHAC1//CNP//DAPK3//EDAR//ELK1//EXTL2//FER//FOXC1//GH2//HLA-B//PTK2B//RGS2//SLC27A1//TRIM21//UBE2V1
GO:0060333	interferon-gamma-mediated_signaling_pathway	Biological Process	2	72	62	17492	0.0269537	0.282788	1.56938	7.83692	0.0322581	HLA-B//TRIM21
GO:0034341	response_to_interferon-gamma	Biological Process	3	184	62	17492	0.0275316	0.282788	1.56017	4.59993	0.0483871	DAPK3//HLA-B//TRIM21
GO:0046328	regulation_of_JNK_cascade	Biological Process	3	186	62	17492	0.028304	0.282788	1.54815	4.55047	0.0483871	EDAR//PTK2B//RASSF2
GO:0051252	regulation_of_RNA_metabolic_process	Biological Process	20	3713	62	17492	0.0283971	0.282788	1.54673	1.51968	0.322581	ATF6B//BAZ1B//BAZ2A//BRWD3//C9orf78//CBX4//CRTC3//CSDC2//DAP//DAPK3//ELK1//FER//FOXC1//FOXN2//HIST1H1E//PKIG//SIX5//TRIM21//UBE2V1//ZNF609
GO:0002479	antigen_processing_and_presentation_of_exogenous_peptide_antigen_via_MHC_class_I,_TAP-dependent	Biological Process	2	75	62	17492	0.0290663	0.28498	1.53661	7.52344	0.0322581	HLA-B//SNAP23
GO:0043407	negative_regulation_of_MAP_kinase_activity	Biological Process	2	75	62	17492	0.0290663	0.28498	1.53661	7.52344	0.0322581	RGS2//STK38
GO:0010506	regulation_of_autophagy	Biological Process	4	329	62	17492	0.0292134	0.28498	1.53442	3.43014	0.0645161	ATP6V0E1//DAP//DAPK3//TRIM21
GO:0046777	protein_autophosphorylation	Biological Process	3	189	62	17492	0.0294841	0.285519	1.53041	4.47824	0.0483871	DAPK3//FER//PTK2B
GO:0046470	phosphatidylcholine_metabolic_process	Biological Process	2	76	62	17492	0.0297849	0.285519	1.526	7.42445	0.0322581	PLA2G4D//SLC27A1
GO:0042590	antigen_processing_and_presentation_of_exogenous_peptide_antigen_via_MHC_class_I	Biological Process	2	79	62	17492	0.0319827	0.286878	1.49508	7.14251	0.0322581	HLA-B//SNAP23
GO:0043405	regulation_of_MAP_kinase_activity	Biological Process	4	339	62	17492	0.0321065	0.286878	1.49341	3.32896	0.0645161	PTK2B//RGS2//STK38//UBE2V1
GO:0070098	chemokine-mediated_signaling_pathway	Biological Process	2	80	62	17492	0.0327292	0.286878	1.48506	7.05323	0.0322581	FOXC1//PTK2B
GO:0099601	regulation_of_neurotransmitter_receptor_activity	Biological Process	2	80	62	17492	0.0327292	0.286878	1.48506	7.05323	0.0322581	CNIH2//PTK2B
GO:0007276	gamete_generation	Biological Process	6	684	62	17492	0.0337462	0.286878	1.47178	2.47482	0.0967742	FOXC1//KRT9//PTK2B//RGS2//SIX5//SLC4A2
GO:0032088	negative_regulation_of_NF-kappaB_transcription_factor_activity	Biological Process	2	82	62	17492	0.0342427	0.286878	1.46543	6.8812	0.0322581	DAP//TRIM21
GO:0071277	cellular_response_to_calcium_ion	Biological Process	2	82	62	17492	0.0342427	0.286878	1.46543	6.8812	0.0322581	CPNE2//CPNE6
GO:0006575	cellular_modified_amino_acid_metabolic_process	Biological Process	3	201	62	17492	0.0344626	0.286878	1.46265	4.21088	0.0483871	CHAC1//PLA2G4D//SLC27A1
GO:0071310	cellular_response_to_organic_substance	Biological Process	14	2362	62	17492	0.0344669	0.286878	1.4626	1.67223	0.225806	ATF6B//ATP6V0E1//DAPK3//EDAR//ELK1//EXTL2//FER//FOXC1//GH2//HLA-B//PTK2B//SLC27A1//TRIM21//UBE2V1
GO:0045833	negative_regulation_of_lipid_metabolic_process	Biological Process	2	83	62	17492	0.0350095	0.286878	1.45581	6.79829	0.0322581	CRTC3//SLC27A1
GO:0046474	glycerophospholipid_biosynthetic_process	Biological Process	3	204	62	17492	0.0357713	0.288275	1.44646	4.14896	0.0483871	CPNE6//PLA2G4D//SLC27A1
GO:0042058	regulation_of_epidermal_growth_factor_receptor_signaling_pathway	Biological Process	2	84	62	17492	0.0357831	0.288275	1.44632	6.71736	0.0322581	FER//VPS25
GO:0042475	odontogenesis_of_dentin-containing_tooth	Biological Process	2	84	62	17492	0.0357831	0.288275	1.44632	6.71736	0.0322581	EDAR//FOXC1
GO:0046427	positive_regulation_of_receptor_signaling_pathway_via_JAK-STAT	Biological Process	2	85	62	17492	0.0365632	0.289066	1.43696	6.63833	0.0322581	GH2//PTK2B
GO:0010629	negative_regulation_of_gene_expression	Biological Process	11	1712	62	17492	0.0367412	0.289066	1.43485	1.81274	0.177419	BAZ2A//CBX4//CHAC1//CTSZ//DAP//DAPK3//FOXC1//HIST1H1E//PKIG//RGS2//SIX5
GO:0051668	localization_within_membrane	Biological Process	2	86	62	17492	0.03735	0.289066	1.42771	6.56114	0.0322581	CNIH2//SEC24C
GO:0051453	regulation_of_intracellular_pH	Biological Process	2	87	62	17492	0.0381432	0.289066	1.41858	6.48572	0.0322581	ATP6V0E1//SLC4A2
GO:1904894	positive_regulation_of_receptor_signaling_pathway_via_STAT	Biological Process	2	88	62	17492	0.0389429	0.289066	1.40957	6.41202	0.0322581	GH2//PTK2B
GO:0016310	phosphorylation	Biological Process	9	1303	62	17492	0.0392115	0.289066	1.40659	1.9487	0.145161	ARAF//BAZ1B//DAPK3//FER//PTK2B//RASSF2//STK38//STK40//UBE2V1
GO:0009966	regulation_of_signal_transduction	Biological Process	17	3112	62	17492	0.0396038	0.289066	1.40226	1.54119	0.274194	ARAF//ATF6B//CHAC1//CNIH2//CRTC3//DAPK3//EDAR//FER//GH2//PTK2B//RASSF2//RGS2//RIC8B//STK38//STK40//UBE2V1//VPS25
GO:0008286	insulin_receptor_signaling_pathway	Biological Process	2	89	62	17492	0.039749	0.289066	1.40067	6.33998	0.0322581	ATP6V0E1//FER
GO:0030838	positive_regulation_of_actin_filament_polymerization	Biological Process	2	89	62	17492	0.039749	0.289066	1.40067	6.33998	0.0322581	FER//PTK2B
GO:1903725	regulation_of_phospholipid_metabolic_process	Biological Process	2	89	62	17492	0.039749	0.289066	1.40067	6.33998	0.0322581	PTK2B//SLC27A1
GO:1990869	cellular_response_to_chemokine	Biological Process	2	89	62	17492	0.039749	0.289066	1.40067	6.33998	0.0322581	FOXC1//PTK2B
GO:0051656	establishment_of_organelle_localization	Biological Process	4	366	62	17492	0.0407375	0.289066	1.39001	3.08338	0.0645161	CNIH2//CTSZ//SEC24C//SNAP23
GO:1901184	regulation_of_ERBB_signaling_pathway	Biological Process	2	91	62	17492	0.0413802	0.289066	1.38321	6.20064	0.0322581	FER//VPS25
GO:0030641	regulation_of_cellular_pH	Biological Process	2	93	62	17492	0.0430364	0.29149	1.36616	6.06729	0.0322581	ATP6V0E1//SLC4A2
GO:0046620	regulation_of_organ_growth	Biological Process	2	93	62	17492	0.0430364	0.29149	1.36616	6.06729	0.0322581	FOXC1//RGS2
GO:1901216	positive_regulation_of_neuron_death	Biological Process	2	93	62	17492	0.0430364	0.29149	1.36616	6.06729	0.0322581	CTSZ//ELK1
GO:0030162	regulation_of_proteolysis	Biological Process	6	726	62	17492	0.043128	0.29149	1.36524	2.33164	0.0967742	ARAF//CHAC1//CTSZ//DAP//PTK2B//TRIM21
GO:0009890	negative_regulation_of_biosynthetic_process	Biological Process	10	1540	62	17492	0.0432809	0.29149	1.3637	1.83201	0.16129	BAZ2A//CBX4//DAP//DAPK3//FOXC1//HIST1H1E//PKIG//RGS2//SIX5//SLC27A1
GO:0006355	regulation_of_transcription,_DNA-templated	Biological Process	18	3398	62	17492	0.0444844	0.29149	1.35179	1.4945	0.290323	ATF6B//BAZ1B//BAZ2A//BRWD3//CBX4//CRTC3//DAP//DAPK3//ELK1//FER//FOXC1//FOXN2//HIST1H1E//PKIG//SIX5//TRIM21//UBE2V1//ZNF609
GO:0032868	response_to_insulin	Biological Process	3	227	62	17492	0.0466452	0.294429	1.33119	3.72858	0.0483871	ATP6V0E1//FER//SLC27A1
GO:0010608	posttranscriptional_regulation_of_gene_expression	Biological Process	5	556	62	17492	0.0468738	0.294429	1.32907	2.53713	0.0806452	C12orf65//CSDC2//DAPK3//PTK2B//RGS2
GO:0019886	antigen_processing_and_presentation_of_exogenous_peptide_antigen_via_MHC_class_II	Biological Process	2	98	62	17492	0.0472833	0.294429	1.32529	5.75774	0.0322581	AP2M1//SEC24C
GO:0044237	cellular_metabolic_process	Biological Process	34	7607	62	17492	0.0472834	0.294429	1.32529	1.26099	0.548387	ACBD5//AP2M1//ARAF//ASB16//ATF6B//BAZ1B//BAZ2A//C12orf65//CBX4//CHAC1//CNP//COPS7B//CPNE6//CSDC2//CTSZ//CYB5B//DAP//DAPK3//EXTL2//FER//GALNT2//HIST1H1E//NUP210//PLA2G4D//PPM1K//PTK2B//RASSF2//SLC27A1//STK38//STK40//TRIM21//UBE2V1//VPS25//WRNIP1
GO:0040029	regulation_of_gene_expression,_epigenetic	Biological Process	3	229	62	17492	0.04766	0.294429	1.32185	3.69601	0.0483871	BAZ1B//BAZ2A//HIST1H1E
GO:0002495	antigen_processing_and_presentation_of_peptide_antigen_via_MHC_class_II	Biological Process	2	99	62	17492	0.0481505	0.294429	1.3174	5.69958	0.0322581	AP2M1//SEC24C
GO:0002504	antigen_processing_and_presentation_of_peptide_or_polysaccharide_antigen_via_MHC_class_II	Biological Process	2	99	62	17492	0.0481505	0.294429	1.3174	5.69958	0.0322581	AP2M1//SEC24C
GO:0043434	response_to_peptide_hormone	Biological Process	4	388	62	17492	0.0486609	0.294429	1.31282	2.90855	0.0645161	ATP6V0E1//FER//GH2//SLC27A1
GO:0006417	regulation_of_translation	Biological Process	4	389	62	17492	0.0490401	0.295477	1.30945	2.90107	0.0645161	C12orf65//DAPK3//PTK2B//RGS2
GO:0032872	regulation_of_stress-activated_MAPK_cascade	Biological Process	3	233	62	17492	0.0497224	0.296446	1.30345	3.63256	0.0483871	EDAR//PTK2B//RASSF2
GO:0006885	regulation_of_pH	Biological Process	2	101	62	17492	0.0499023	0.296446	1.30188	5.58671	0.0322581	ATP6V0E1//SLC4A2
GO:0051649	establishment_of_localization_in_cell	Biological Process	4	392	62	17492	0.0501875	0.296446	1.2994	2.87887	0.0645161	CNIH2//CTSZ//SEC24C//SNAP23
GO:0070302	regulation_of_stress-activated_protein_kinase_signaling_cascade	Biological Process	3	236	62	17492	0.0512976	0.296446	1.2899	3.58639	0.0483871	EDAR//PTK2B//RASSF2
GO:1903506	regulation_of_nucleic_acid-templated_transcription	Biological Process	18	3465	62	17492	0.0525458	0.297983	1.27946	1.46561	0.290323	ATF6B//BAZ1B//BAZ2A//BRWD3//CBX4//CRTC3//DAP//DAPK3//ELK1//FER//FOXC1//FOXN2//HIST1H1E//PKIG//SIX5//TRIM21//UBE2V1//ZNF609
GO:0030968	endoplasmic_reticulum_unfolded_protein_response	Biological Process	2	104	62	17492	0.052573	0.297983	1.27924	5.42556	0.0322581	ATF6B//EXTL2
GO:2001141	regulation_of_RNA_biosynthetic_process	Biological Process	18	3470	62	17492	0.0531875	0.300279	1.27419	1.46349	0.290323	ATF6B//BAZ1B//BAZ2A//BRWD3//CBX4//CRTC3//DAP//DAPK3//ELK1//FER//FOXC1//FOXN2//HIST1H1E//PKIG//SIX5//TRIM21//UBE2V1//ZNF609
GO:0008654	phospholipid_biosynthetic_process	Biological Process	3	243	62	17492	0.055067	0.303567	1.25911	3.48307	0.0483871	CPNE6//PLA2G4D//SLC27A1
GO:1901222	regulation_of_NIK|NF-kappaB_signaling	Biological Process	2	109	62	17492	0.0571349	0.30559	1.2431	5.17668	0.0322581	EDAR//RASSF2
GO:0031032	actomyosin_structure_organization	Biological Process	2	110	62	17492	0.0580635	0.30559	1.2361	5.12962	0.0322581	EPB41L2//PTK2B
GO:0034622	cellular_protein-containing_complex_assembly	Biological Process	6	789	62	17492	0.0600548	0.310543	1.22145	2.14547	0.0967742	AP2M1//BAZ2A//COPS7B//HIST1H1E//PTK2B//SNAP23
GO:0050730	regulation_of_peptidyl-tyrosine_phosphorylation	Biological Process	3	253	62	17492	0.0606766	0.310543	1.21698	3.3454	0.0483871	GH2//PTK2B//VPS25
GO:1903828	negative_regulation_of_cellular_protein_localization	Biological Process	2	113	62	17492	0.0608807	0.310543	1.21552	4.99343	0.0322581	AP2M1//PKIG
GO:0034976	response_to_endoplasmic_reticulum_stress	Biological Process	3	255	62	17492	0.0618297	0.310543	1.2088	3.31917	0.0483871	ATF6B//CHAC1//EXTL2
GO:0001952	regulation_of_cell-matrix_adhesion	Biological Process	2	114	62	17492	0.0618301	0.310543	1.2088	4.94963	0.0322581	DAPK3//PTK2B
GO:0007268	chemical_synaptic_transmission	Biological Process	4	421	62	17492	0.0620413	0.310543	1.20732	2.68056	0.0645161	CNIH2//CNP//CPNE6//SNAP23
GO:0060341	regulation_of_cellular_localization	Biological Process	6	796	62	17492	0.0621519	0.310543	1.20655	2.1266	0.0967742	AP2M1//CNIH2//EPB41L2//FER//PKIG//PTK2B
GO:0001934	positive_regulation_of_protein_phosphorylation	Biological Process	7	1000	62	17492	0.0626879	0.312126	1.20282	1.9749	0.112903	ARAF//EDAR//GH2//PTK2B//RASSF2//SLC27A1//UBE2V1
GO:0032870	cellular_response_to_hormone_stimulus	Biological Process	5	605	62	17492	0.062904	0.312126	1.20132	2.33164	0.0806452	ATP6V0E1//ELK1//FER//GH2//SLC27A1
GO:1904375	regulation_of_protein_localization_to_cell_periphery	Biological Process	2	116	62	17492	0.0637442	0.312377	1.19556	4.86429	0.0322581	AP2M1//EPB41L2
GO:0043085	positive_regulation_of_catalytic_activity	Biological Process	9	1431	62	17492	0.0640902	0.312377	1.19321	1.7744	0.145161	CYB5B//DAP//PTK2B//RASSF2//RGS2//RIC8B//SLC27A1//UBE2V1//WRNIP1
GO:0033209	tumor_necrosis_factor-mediated_signaling_pathway	Biological Process	2	117	62	17492	0.0647088	0.312377	1.18904	4.82272	0.0322581	EDAR//PTK2B
GO:0045927	positive_regulation_of_growth	Biological Process	3	260	62	17492	0.0647576	0.312377	1.18871	3.25533	0.0483871	CPNE6//GH2//PTK2B
GO:0006914	autophagy	Biological Process	3	261	62	17492	0.0653508	0.312377	1.18475	3.24286	0.0483871	ACBD5//DAP//VPS25
GO:0006807	nitrogen_compound_metabolic_process	Biological Process	31	6966	62	17492	0.0666216	0.317393	1.17639	1.25553	0.5	AP2M1//ARAF//ASB16//ATF6B//BAZ1B//BAZ2A//C12orf65//CBX4//CHAC1//CNP//COPS7B//CSDC2//CTSZ//DAPK3//EXTL2//FER//FOXC1//GALNT2//HIST1H1E//NUP210//PLA2G4D//PPM1K//PTK2B//RASSF2//SLC27A1//STK38//STK40//TRIM21//UBE2V1//VPS25//WRNIP1
GO:0071375	cellular_response_to_peptide_hormone_stimulus	Biological Process	3	265	62	17492	0.067749	0.318196	1.1691	3.19391	0.0483871	ATP6V0E1//FER//GH2
GO:0042476	odontogenesis	Biological Process	2	122	62	17492	0.0696051	0.318196	1.15736	4.62507	0.0322581	EDAR//FOXC1
GO:0019953	sexual_reproduction	Biological Process	6	820	62	17492	0.0696731	0.318196	1.15693	2.06436	0.0967742	FOXC1//KRT9//PTK2B//RGS2//SIX5//SLC4A2
GO:0048609	multicellular_organismal_reproductive_process	Biological Process	6	820	62	17492	0.0696731	0.318196	1.15693	2.06436	0.0967742	FOXC1//KRT9//PTK2B//RGS2//SIX5//SLC4A2
GO:0006282	regulation_of_DNA_repair	Biological Process	2	123	62	17492	0.0705987	0.318196	1.1512	4.58746	0.0322581	UBE2V1//WRNIP1
GO:0007519	skeletal_muscle_tissue_development	Biological Process	2	123	62	17492	0.0705987	0.318196	1.1512	4.58746	0.0322581	FOXN2//SVIL
GO:0010941	regulation_of_cell_death	Biological Process	10	1683	62	17492	0.0708526	0.318196	1.14964	1.67635	0.16129	ARAF//CBX4//CTSZ//DAP//DAPK3//ELK1//FOXC1//PTK2B//RASSF2//STK40
GO:0007219	Notch_signaling_pathway	Biological Process	2	124	62	17492	0.071597	0.318196	1.14511	4.55047	0.0322581	CHAC1//FOXC1
GO:0032273	positive_regulation_of_protein_polymerization	Biological Process	2	125	62	17492	0.0725999	0.320333	1.13906	4.51406	0.0322581	FER//PTK2B
GO:0046434	organophosphate_catabolic_process	Biological Process	2	126	62	17492	0.0736075	0.321046	1.13308	4.47824	0.0322581	CNP//PLA2G4D
GO:0034620	cellular_response_to_unfolded_protein	Biological Process	2	127	62	17492	0.0746196	0.321046	1.12715	4.44298	0.0322581	ATF6B//EXTL2
GO:0017148	negative_regulation_of_translation	Biological Process	2	128	62	17492	0.0756362	0.321046	1.12127	4.40827	0.0322581	DAPK3//RGS2
GO:0060968	regulation_of_gene_silencing	Biological Process	2	128	62	17492	0.0756362	0.321046	1.12127	4.40827	0.0322581	HIST1H1E//NUP210
GO:0014706	striated_muscle_tissue_development	Biological Process	3	278	62	17492	0.0758176	0.321046	1.12023	3.04456	0.0483871	FOXC1//FOXN2//SVIL
GO:0007292	female_gamete_generation	Biological Process	2	129	62	17492	0.0766572	0.321046	1.11545	4.37409	0.0322581	PTK2B//RGS2
GO:0035295	tube_development	Biological Process	6	842	62	17492	0.0770187	0.321046	1.1134	2.01042	0.0967742	CTSZ//EDAR//FOXC1//PTK2B//SLC4A2//STK40
GO:0097190	apoptotic_signaling_pathway	Biological Process	3	280	62	17492	0.0770955	0.321046	1.11297	3.02281	0.0483871	CHAC1//DAP//DAPK3
GO:0042327	positive_regulation_of_phosphorylation	Biological Process	7	1051	62	17492	0.0773617	0.321046	1.11147	1.87907	0.112903	ARAF//EDAR//GH2//PTK2B//RASSF2//SLC27A1//UBE2V1
GO:0061024	membrane_organization	Biological Process	6	844	62	17492	0.0777078	0.321046	1.10954	2.00566	0.0967742	AP2M1//CNIH2//CNP//CTSZ//SEC24C//SNAP23
GO:0046425	regulation_of_receptor_signaling_pathway_via_JAK-STAT	Biological Process	2	131	62	17492	0.0787126	0.321046	1.10396	4.30731	0.0322581	GH2//PTK2B
GO:0007166	cell_surface_receptor_signaling_pathway	Biological Process	13	2417	62	17492	0.0788433	0.321046	1.10323	1.51745	0.209677	AP2M1//ATP6V0E1//CHAC1//EDAR//FER//FOXC1//GH2//HLA-B//PTK2B//RASSF2//SLC27A1//TRIM21//UBE2V1
GO:0010976	positive_regulation_of_neuron_projection_development	Biological Process	3	283	62	17492	0.0790302	0.321046	1.10221	2.99077	0.0483871	CPNE6//PTK2B//RGS2
GO:0045471	response_to_ethanol	Biological Process	2	132	62	17492	0.0797468	0.322001	1.09829	4.27468	0.0322581	PTK2B//RGS2
GO:0060538	skeletal_muscle_organ_development	Biological Process	2	132	62	17492	0.0797468	0.322001	1.09829	4.27468	0.0322581	FOXN2//SVIL
GO:0046907	intracellular_transport	Biological Process	9	1510	62	17492	0.0836569	0.322001	1.0775	1.68156	0.145161	AP2M1//CNIH2//CTSZ//ERGIC1//NUP210//SEC24C//SNAP23//SRP72//VPS25
GO:0031644	regulation_of_nervous_system_process	Biological Process	2	136	62	17492	0.0839261	0.322001	1.0761	4.14896	0.0322581	CNIH2//PTK2B
GO:0060537	muscle_tissue_development	Biological Process	3	291	62	17492	0.0842934	0.322001	1.07421	2.90855	0.0483871	FOXC1//FOXN2//SVIL
GO:0050769	positive_regulation_of_neurogenesis	Biological Process	4	469	62	17492	0.0846335	0.322001	1.07246	2.40622	0.0645161	CPNE6//PTK2B//RGS2//ZNF609
GO:0061061	muscle_structure_development	Biological Process	4	469	62	17492	0.0846335	0.322001	1.07246	2.40622	0.0645161	FOXC1//FOXN2//SVIL//ZNF609
GO:0033135	regulation_of_peptidyl-serine_phosphorylation	Biological Process	2	137	62	17492	0.0849813	0.322001	1.07068	4.11867	0.0322581	ARAF//RASSF2
GO:0097746	regulation_of_blood_vessel_diameter	Biological Process	2	137	62	17492	0.0849813	0.322001	1.07068	4.11867	0.0322581	FOXC1//RGS2
GO:0009410	response_to_xenobiotic_stimulus	Biological Process	3	293	62	17492	0.0856325	0.322001	1.06736	2.88869	0.0483871	CYB5B//PTK2B//RGS2
GO:1901652	response_to_peptide	Biological Process	4	471	62	17492	0.0856529	0.322001	1.06726	2.396	0.0645161	ATP6V0E1//FER//GH2//SLC27A1
GO:0035150	regulation_of_tube_size	Biological Process	2	138	62	17492	0.0860406	0.322001	1.0653	4.08883	0.0322581	FOXC1//RGS2
GO:0010628	positive_regulation_of_gene_expression	Biological Process	11	1979	62	17492	0.0863339	0.322001	1.06382	1.56818	0.177419	ATF6B//BAZ1B//CRTC3//EDAR//ELK1//FOXC1//HIST1H1E//PTK2B//SIX5//UBE2V1//ZNF609
GO:0043087	regulation_of_GTPase_activity	Biological Process	4	477	62	17492	0.0887475	0.322971	1.05184	2.36586	0.0645161	PDE6D//PTK2B//RGS2//RIC8B
GO:0051051	negative_regulation_of_transport	Biological Process	4	484	62	17492	0.0924264	0.322971	1.0342	2.33164	0.0645161	CNIH2//PKIG//PTK2B//RGS2
GO:0008277	regulation_of_G_protein-coupled_receptor_signaling_pathway	Biological Process	2	144	62	17492	0.0924801	0.322971	1.03395	3.91846	0.0322581	RGS2//RIC8B
GO:0045834	positive_regulation_of_lipid_metabolic_process	Biological Process	2	144	62	17492	0.0924801	0.322971	1.03395	3.91846	0.0322581	PTK2B//SLC27A1
GO:0042981	regulation_of_apoptotic_process	Biological Process	9	1543	62	17492	0.092815	0.322971	1.03238	1.6456	0.145161	ARAF//CBX4//CTSZ//DAP//DAPK3//FOXC1//PTK2B//RASSF2//STK40
GO:0007165	signal_transduction	Biological Process	23	5010	62	17492	0.0931064	0.322971	1.03102	1.2952	0.370968	AP2M1//ARAF//ASB16//ATF6B//ATP6V0E1//CHAC1//DAP//DAPK3//EDAR//EXTL2//FER//FOXC1//GH2//HLA-B//PKIG//PTK2B//RASSF2//RGS2//RIC8B//SLC27A1//STK38//TRIM21//UBE2V1
GO:0006650	glycerophospholipid_metabolic_process	Biological Process	3	304	62	17492	0.0931594	0.322971	1.03077	2.78417	0.0483871	CPNE6//PLA2G4D//SLC27A1
GO:0007010	cytoskeleton_organization	Biological Process	7	1100	62	17492	0.0932389	0.322971	1.0304	1.79537	0.112903	BRWD3//CNP//EPB41L2//FER//KRT9//PTK2B//SVIL
GO:0022604	regulation_of_cell_morphogenesis	Biological Process	4	490	62	17492	0.0956377	0.322971	1.01937	2.30309	0.0645161	BRWD3//CPNE6//DAPK3//PTK2B
GO:0035967	cellular_response_to_topologically_incorrect_protein	Biological Process	2	147	62	17492	0.0957517	0.322971	1.01885	3.83849	0.0322581	ATF6B//EXTL2
GO:0018205	peptidyl-lysine_modification	Biological Process	3	308	62	17492	0.0959632	0.322971	1.0179	2.74801	0.0483871	CBX4//HIST1H1E//NUP210
GO:0006325	chromatin_organization	Biological Process	5	688	62	17492	0.0963454	0.322971	1.01617	2.05036	0.0806452	BAZ1B//BAZ2A//CBX4//DAPK3//HIST1H1E
GO:1901214	regulation_of_neuron_death	Biological Process	3	310	62	17492	0.0973781	0.322971	1.01154	2.73028	0.0483871	CTSZ//ELK1//PTK2B
GO:0120035	regulation_of_plasma_membrane_bounded_cell_projection_organization	Biological Process	5	691	62	17492	0.0976987	0.322971	1.01011	2.04145	0.0806452	CPNE6//CTSZ//FER//PTK2B//RGS2
GO:0043067	regulation_of_programmed_cell_death	Biological Process	9	1563	62	17492	0.0986491	0.322971	1.00591	1.62454	0.145161	ARAF//CBX4//CTSZ//DAP//DAPK3//FOXC1//PTK2B//RASSF2//STK40
GO:0006631	fatty_acid_metabolic_process	Biological Process	3	312	62	17492	0.0988016	0.322971	1.00524	2.71278	0.0483871	ACBD5//PLA2G4D//SLC27A1
GO:0010975	regulation_of_neuron_projection_development	Biological Process	4	496	62	17492	0.0989019	0.322971	1.0048	2.27523	0.0645161	CPNE6//CTSZ//PTK2B//RGS2
GO:0043271	negative_regulation_of_ion_transport	Biological Process	2	150	62	17492	0.0990564	0.322971	1.00412	3.76172	0.0322581	PTK2B//RGS2
GO:0051092	positive_regulation_of_NF-kappaB_transcription_factor_activity	Biological Process	2	150	62	17492	0.0990564	0.322971	1.00412	3.76172	0.0322581	FER//UBE2V1
GO:0010942	positive_regulation_of_cell_death	Biological Process	5	694	62	17492	0.0990618	0.322971	1.00409	2.03263	0.0806452	CTSZ//DAP//DAPK3//ELK1//RASSF2
GO:1902532	negative_regulation_of_intracellular_signal_transduction	Biological Process	4	497	62	17492	0.0994511	0.322971	1.00239	2.27066	0.0645161	CRTC3//RASSF2//RGS2//STK38

## Sheet: CC_result
ID	Term	Ontology	Count	Size	numInt	numTotal	p_value	fdr	Enrichment_Score	Fold_Enrichment	GeneRatio	Genes
GO:0030134	COPII-coated_ER_to_Golgi_transport_vesicle	Cellular Component	5	98	67	18337	2.92269e-05	0.0078328	4.53422	13.9636	0.0746269	CNIH2//CTSZ//ERGIC1//HLA-B//SEC24C
GO:0030135	coated_vesicle	Cellular Component	7	298	67	18337	0.000105377	0.0141205	3.97726	6.42888	0.104478	AP2M1//CNIH2//CPNE6//CTSZ//ERGIC1//HLA-B//SEC24C
GO:0000792	heterochromatin	Cellular Component	4	78	67	18337	0.000189474	0.0169263	3.72245	14.0352	0.0597015	BAZ1B//BAZ2A//FOXC1//HIST1H1E
GO:0005798	Golgi-associated_vesicle	Cellular Component	5	185	67	18337	0.000576463	0.0309128	3.23923	7.39693	0.0746269	CNIH2//CTSZ//ERGIC1//HLA-B//SEC24C
GO:0043227	membrane-bounded_organelle	Cellular Component	58	12575	67	18337	0.000576731	0.0309128	3.23903	1.26233	0.865672	ACBD5//AP2M1//ARAF//ATF6B//ATP6V0E1//BAZ1B//BAZ2A//BRWD3//C12orf65//C7//C9orf78//CBX4//CHAC1//CNIH2//CNP//COPS7B//CPNE2//CPNE6//CRTC3//CSDC2//CTSZ//CYB5B//DAPK3//ELK1//EPB41L2//ERGIC1//EXTL2//FER//FOXC1//FOXN2//GALNT2//GH2//HIST1H1E//HLA-B//KRT9//NUP210//PDE6D//PKIG//PPM1K//PTK2B//R3HDM2//RASSF2//RGS2//SEC24C//SIX5//SLC27A1//SNAP23//SNURF//SRP72//STK38//STK40//SVIL//TRIM21//UBE2V1//VPS25//WRNIP1/…
GO:0043231	intracellular_membrane-bounded_organelle	Cellular Component	53	11099	67	18337	0.00095666	0.0427308	3.01924	1.30691	0.791045	ACBD5//AP2M1//ARAF//ATF6B//BAZ1B//BAZ2A//BRWD3//C12orf65//C9orf78//CBX4//CHAC1//CNIH2//CNP//COPS7B//CPNE2//CRTC3//CSDC2//CTSZ//CYB5B//DAPK3//ELK1//EPB41L2//ERGIC1//EXTL2//FER//FOXC1//FOXN2//GALNT2//HIST1H1E//HLA-B//KRT9//NUP210//PKIG//PPM1K//PTK2B//R3HDM2//RASSF2//RGS2//SEC24C//SIX5//SLC27A1//SNAP23//SNURF//SRP72//STK38//STK40//SVIL//TRIM21//UBE2V1//VPS25//WRNIP1//ZNF609//ZNF710
GO:0031981	nuclear_lumen	Cellular Component	29	4719	67	18337	0.00132279	0.0450113	2.87851	1.68191	0.432836	ACBD5//ATF6B//BAZ1B//BAZ2A//C9orf78//CBX4//CNP//COPS7B//CRTC3//DAPK3//ELK1//EPB41L2//ERGIC1//EXTL2//FER//FOXC1//FOXN2//HIST1H1E//RASSF2//RGS2//SIX5//SNAP23//SNURF//STK40//TRIM21//UBE2V1//VPS25//WRNIP1//ZNF609
GO:0005634	nucleus	Cellular Component	40	7488	67	18337	0.00138304	0.0450113	2.85916	1.462	0.597015	ACBD5//ATF6B//BAZ1B//BAZ2A//BRWD3//C9orf78//CBX4//CNP//COPS7B//CPNE2//CRTC3//CSDC2//DAPK3//ELK1//EPB41L2//ERGIC1//EXTL2//FER//FOXC1//FOXN2//HIST1H1E//KRT9//NUP210//PKIG//PTK2B//R3HDM2//RASSF2//RGS2//SIX5//SNAP23//SNURF//STK38//STK40//SVIL//TRIM21//UBE2V1//VPS25//WRNIP1//ZNF609//ZNF710
GO:0012507	ER_to_Golgi_transport_vesicle_membrane	Cellular Component	3	62	67	18337	0.00151157	0.0450113	2.82057	13.2429	0.0447761	CNIH2//HLA-B//SEC24C
GO:0033116	endoplasmic_reticulum-Golgi_intermediate_compartment_membrane	Cellular Component	3	72	67	18337	0.00232251	0.0622434	2.63404	11.4036	0.0447761	CNIH2//CTSZ//ERGIC1
GO:0030670	phagocytic_vesicle_membrane	Cellular Component	3	76	67	18337	0.00270935	0.0660097	2.56713	10.8034	0.0447761	ATP6V0E1//HLA-B//SNAP23
GO:0030666	endocytic_vesicle_membrane	Cellular Component	4	163	67	18337	0.00298537	0.0666732	2.525	6.71623	0.0597015	AP2M1//ATP6V0E1//HLA-B//SNAP23
GO:0043229	intracellular_organelle	Cellular Component	57	12873	67	18337	0.00380536	0.077963	2.4196	1.21185	0.850746	ACBD5//AP2M1//ARAF//ATF6B//ATP6V0E1//BAZ1B//BAZ2A//BRWD3//C12orf65//C9orf78//CBX4//CHAC1//CNIH2//CNP//COPS7B//CPNE2//CPNE6//CRTC3//CSDC2//CTSZ//CYB5B//DAPK3//ELK1//EPB41L2//ERGIC1//EXTL2//FER//FOXC1//FOXN2//GALNT2//GH2//HIST1H1E//HLA-B//KRT9//NUP210//PDE6D//PKIG//PPM1K//PTK2B//R3HDM2//RASSF2//RGS2//SEC24C//SIX5//SLC27A1//SNAP23//SNURF//SRP72//STK38//STK40//SVIL//TRIM21//UBE2V1//VPS25//WRNIP1//ZNF…
GO:0030662	coated_vesicle_membrane	Cellular Component	4	180	67	18337	0.00425408	0.077963	2.37119	6.08192	0.0597015	AP2M1//CNIH2//HLA-B//SEC24C
GO:0005737	cytoplasm	Cellular Component	53	11647	67	18337	0.00444116	0.077963	2.3525	1.24542	0.791045	ACBD5//AP2M1//ARAF//ASB16//ATF6B//ATP6V0E1//BAZ2A//BCAS4//C12orf65//C9orf78//CHAC1//CNIH2//CNP//COPS7B//CPNE2//CPNE6//CRTC3//CSDC2//CTSZ//CYB5B//DAPK3//ELK1//EPB41L2//ERGIC1//EXTL2//FER//FOXC1//GALNT2//GH2//HLA-B//KRT9//NUP210//PDE6D//PKIG//PLA2G4D//PPM1K//PTK2B//RASSF2//RGS2//RIC8B//SEC24C//SIX5//SLC27A1//SNAP23//SRP72//STK38//STK40//SVIL//TMEM134//TRIM21//UBE2V1//VPS25//WRNIP1
GO:0030139	endocytic_vesicle	Cellular Component	5	298	67	18337	0.00465451	0.077963	2.33213	4.59206	0.0746269	AP2M1//ATP6V0E1//CPNE6//HLA-B//SNAP23
GO:0005829	cytosol	Cellular Component	29	5142	67	18337	0.00528104	0.083254	2.27728	1.54355	0.432836	AP2M1//ARAF//ASB16//BAZ2A//BCAS4//C9orf78//CHAC1//CNP//COPS7B//CRTC3//EPB41L2//EXTL2//FER//FOXC1//KRT9//PDE6D//PLA2G4D//PTK2B//RASSF2//RGS2//RIC8B//SEC24C//SRP72//STK38//STK40//SVIL//TRIM21//UBE2V1//VPS25
GO:0005938	cell_cortex	Cellular Component	5	321	67	18337	0.00634684	0.0944973	2.19744	4.26303	0.0746269	CTSZ//EPB41L2//FER//PTK2B//RIC8B
GO:0005720	nuclear_heterochromatin	Cellular Component	2	35	67	18337	0.00723987	0.0976002	2.14027	15.6392	0.0298507	FOXC1//HIST1H1E
GO:0008180	COP9_signalosome	Cellular Component	2	36	67	18337	0.00764778	0.0976002	2.11646	15.2048	0.0298507	COPS7B//EPB41L2
GO:0030660	Golgi-associated_vesicle_membrane	Cellular Component	3	114	67	18337	0.00839929	0.102319	2.07576	7.20228	0.0447761	CNIH2//HLA-B//SEC24C
GO:0099738	cell_cortex_region	Cellular Component	2	42	67	18337	0.010306	0.117084	1.98691	13.0327	0.0298507	CTSZ//EPB41L2
GO:0005654	nucleoplasm	Cellular Component	23	3948	67	18337	0.0106946	0.117084	1.97083	1.59443	0.343284	ACBD5//BAZ1B//BAZ2A//C9orf78//CBX4//CNP//COPS7B//CRTC3//DAPK3//ELK1//EPB41L2//ERGIC1//EXTL2//FOXC1//FOXN2//RASSF2//SNAP23//SNURF//STK40//TRIM21//UBE2V1//VPS25//ZNF609
GO:0005793	endoplasmic_reticulum-Golgi_intermediate_compartment	Cellular Component	3	131	67	18337	0.0122409	0.126175	1.91219	6.26763	0.0447761	CNIH2//CTSZ//ERGIC1
GO:0045335	phagocytic_vesicle	Cellular Component	3	134	67	18337	0.0130072	0.129109	1.88581	6.12731	0.0447761	ATP6V0E1//HLA-B//SNAP23
GO:0008328	ionotropic_glutamate_receptor_complex	Cellular Component	2	52	67	18337	0.0155051	0.147293	1.80953	10.5264	0.0298507	CNIH2//PTK2B
GO:0030120	vesicle_coat	Cellular Component	2	54	67	18337	0.0166549	0.147293	1.77846	10.1365	0.0298507	AP2M1//SEC24C
GO:0005925	focal_adhesion	Cellular Component	5	411	67	18337	0.0171296	0.147293	1.76625	3.32952	0.0746269	EPB41L2//PTK2B//SLC4A2//SNAP23//SVIL
GO:0005924	cell-substrate_adherens_junction	Cellular Component	5	414	67	18337	0.0176202	0.147293	1.75399	3.30539	0.0746269	EPB41L2//PTK2B//SLC4A2//SNAP23//SVIL
GO:0030055	cell-substrate_junction	Cellular Component	5	418	67	18337	0.0182888	0.147293	1.73782	3.27376	0.0746269	EPB41L2//PTK2B//SLC4A2//SNAP23//SVIL
GO:0009898	cytoplasmic_side_of_plasma_membrane	Cellular Component	3	154	67	18337	0.0188102	0.147293	1.72561	5.33156	0.0447761	FER//PTK2B//RGS2
GO:0045334	clathrin-coated_endocytic_vesicle	Cellular Component	2	59	67	18337	0.0196827	0.147293	1.70591	9.27751	0.0298507	AP2M1//CPNE6
GO:0030176	integral_component_of_endoplasmic_reticulum_membrane	Cellular Component	3	157	67	18337	0.0197857	0.147293	1.70365	5.22968	0.0447761	ATF6B//ERGIC1//HLA-B
GO:0031227	intrinsic_component_of_endoplasmic_reticulum_membrane	Cellular Component	3	165	67	18337	0.022522	0.154113	1.64739	4.97612	0.0447761	ATF6B//ERGIC1//HLA-B
GO:0030659	cytoplasmic_vesicle_membrane	Cellular Component	7	781	67	18337	0.0235242	0.154113	1.62848	2.45302	0.104478	AP2M1//ATP6V0E1//CNIH2//HLA-B//PDE6D//SEC24C//SNAP23
GO:0030173	integral_component_of_Golgi_membrane	Cellular Component	2	65	67	18337	0.0235955	0.154113	1.62717	8.42113	0.0298507	ERGIC1//GALNT2
GO:0012506	vesicle_membrane	Cellular Component	7	802	67	18337	0.0267033	0.156167	1.57343	2.38879	0.104478	AP2M1//ATP6V0E1//CNIH2//HLA-B//PDE6D//SEC24C//SNAP23
GO:0031228	intrinsic_component_of_Golgi_membrane	Cellular Component	2	70	67	18337	0.027079	0.156167	1.56737	7.81962	0.0298507	ERGIC1//GALNT2
GO:0098562	cytoplasmic_side_of_membrane	Cellular Component	3	178	67	18337	0.0273875	0.156167	1.56245	4.61269	0.0447761	FER//PTK2B//RGS2
GO:0000785	chromatin	Cellular Component	9	1211	67	18337	0.0314032	0.168321	1.50303	2.034	0.134328	ATF6B//BAZ1B//BAZ2A//ELK1//FER//FOXC1//FOXN2//HIST1H1E//SIX5
GO:0000228	nuclear_chromosome	Cellular Component	9	1260	67	18337	0.0390197	0.183905	1.40872	1.9549	0.134328	ATF6B//BAZ1B//ELK1//FER//FOXC1//FOXN2//HIST1H1E//SIX5//WRNIP1
GO:0031301	integral_component_of_organelle_membrane	Cellular Component	4	359	67	18337	0.0422728	0.183905	1.37394	3.04943	0.0597015	ATF6B//ERGIC1//GALNT2//HLA-B
GO:0031410	cytoplasmic_vesicle	Cellular Component	14	2351	67	18337	0.0426542	0.183905	1.37004	1.62978	0.208955	AP2M1//ATP6V0E1//CNIH2//CNP//CPNE6//CTSZ//ERGIC1//GH2//HLA-B//PDE6D//SEC24C//SNAP23//TRIM21//VPS25
GO:0097708	intracellular_vesicle	Cellular Component	14	2354	67	18337	0.0430481	0.183905	1.36605	1.6277	0.208955	AP2M1//ATP6V0E1//CNIH2//CNP//CPNE6//CTSZ//ERGIC1//GH2//HLA-B//PDE6D//SEC24C//SNAP23//TRIM21//VPS25
GO:0005789	endoplasmic_reticulum_membrane	Cellular Component	8	1086	67	18337	0.0436285	0.183905	1.36023	2.01611	0.119403	ATF6B//CNIH2//ERGIC1//EXTL2//GALNT2//HLA-B//NUP210//SEC24C
GO:0030658	transport_vesicle_membrane	Cellular Component	3	216	67	18337	0.0445556	0.183905	1.3511	3.8012	0.0447761	CNIH2//HLA-B//SEC24C
GO:0030117	membrane_coat	Cellular Component	2	92	67	18337	0.0446039	0.183905	1.35063	5.94971	0.0298507	AP2M1//SEC24C
GO:0031234	extrinsic_component_of_cytoplasmic_side_of_plasma_membrane	Cellular Component	2	92	67	18337	0.0446039	0.183905	1.35063	5.94971	0.0298507	FER//PTK2B
GO:0005694	chromosome	Cellular Component	11	1717	67	18337	0.0458563	0.186204	1.3386	1.75338	0.164179	ATF6B//BAZ1B//BAZ2A//ELK1//FER//FOXC1//FOXN2//HIST1H1E//RASSF2//SIX5//WRNIP1
GO:0042175	nuclear_outer_membrane-endoplasmic_reticulum_membrane_network	Cellular Component	8	1108	67	18337	0.0481253	0.192501	1.31763	1.97608	0.119403	ATF6B//CNIH2//ERGIC1//EXTL2//GALNT2//HLA-B//NUP210//SEC24C
GO:0005912	adherens_junction	Cellular Component	5	553	67	18337	0.0514075	0.19967	1.28897	2.47456	0.0746269	EPB41L2//PTK2B//SLC4A2//SNAP23//SVIL
GO:0031300	intrinsic_component_of_organelle_membrane	Cellular Component	4	390	67	18337	0.0542824	0.201872	1.26534	2.80704	0.0597015	ATF6B//ERGIC1//GALNT2//HLA-B
GO:0000139	Golgi_membrane	Cellular Component	6	755	67	18337	0.0572473	0.201872	1.24224	2.17499	0.0895522	CNIH2//CTSZ//ERGIC1//GALNT2//HLA-B//SEC24C
GO:0031090	organelle_membrane	Cellular Component	18	3520	67	18337	0.0786582	0.250957	1.10426	1.39953	0.268657	ACBD5//AP2M1//ATF6B//ATP6V0E1//CNIH2//CNP//CTSZ//CYB5B//ERGIC1//EXTL2//GALNT2//HLA-B//NUP210//PDE6D//SEC24C//SLC27A1//SNAP23//VPS25
GO:0000790	nuclear_chromatin	Cellular Component	7	1031	67	18337	0.0815133	0.254018	1.08877	1.8582	0.104478	ATF6B//ELK1//FER//FOXC1//FOXN2//HIST1H1E//SIX5
GO:0000151	ubiquitin_ligase_complex	Cellular Component	3	287	67	18337	0.0876679	0.263989	1.05716	2.86084	0.0447761	CBX4//TRIM21//UBE2V1
GO:0150034	distal_axon	Cellular Component	3	291	67	18337	0.0904857	0.26754	1.04342	2.82151	0.0447761	CTSZ//ELK1//PTK2B
GO:0005783	endoplasmic_reticulum	Cellular Component	11	1940	67	18337	0.0924636	0.26935	1.03403	1.55183	0.164179	ATF6B//CNIH2//CTSZ//ERGIC1//EXTL2//GALNT2//HLA-B//NUP210//SEC24C//SLC27A1//SRP72
GO:0031982	vesicle	Cellular Component	19	3852	67	18337	0.0947697	0.2731	1.02333	1.34996	0.283582	AP2M1//ATP6V0E1//C7//CNIH2//CNP//CPNE2//CPNE6//CTSZ//EPB41L2//ERGIC1//GH2//HLA-B//KRT9//PDE6D//SEC24C//SNAP23//TRIM21//UBE2V1//VPS25

## Sheet: MF_result
ID	Term	Ontology	Count	Size	numInt	numTotal	p_value	fdr	Enrichment_Score	Fold_Enrichment	GeneRatio	Genes
GO:0008140	cAMP_response_element_binding_protein_binding	Molecular Function	2	8	58	15624	0.000373829	0.0835654	3.42733	67.3448	0.0344828	CRTC3//DAPK3
GO:0004715	non-membrane_spanning_protein_tyrosine_kinase_activity	Molecular Function	3	46	58	15624	0.000657995	0.0835654	3.18178	17.5682	0.0517241	BAZ1B//FER//PTK2B
GO:0005544	calcium-dependent_phospholipid_binding	Molecular Function	3	56	58	15624	0.00117039	0.0990931	2.93167	14.431	0.0517241	CPNE2//CPNE6//PLA2G4D
GO:0004672	protein_kinase_activity	Molecular Function	8	612	58	15624	0.00180128	0.114381	2.74442	3.5213	0.137931	ARAF//BAZ1B//DAPK3//FER//PTK2B//RASSF2//STK38//STK40
GO:0001965	G-protein_alpha-subunit_binding	Molecular Function	2	24	58	15624	0.00354695	0.117864	2.45014	22.4483	0.0344828	RGS2//RIC8B
GO:0016773	phosphotransferase_activity,_alcohol_group_as_acceptor	Molecular Function	8	720	58	15624	0.00487936	0.130961	2.31164	2.9931	0.137931	ARAF//BAZ1B//DAPK3//FER//PTK2B//RASSF2//STK38//STK40
GO:0004112	cyclic-nucleotide_phosphodiesterase_activity	Molecular Function	2	29	58	15624	0.00515595	0.130961	2.28769	18.5779	0.0344828	CNP//PDE6D
GO:0016301	kinase_activity	Molecular Function	8	786	58	15624	0.0081673	0.159576	2.08792	2.74177	0.137931	ARAF//BAZ1B//DAPK3//FER//PTK2B//RASSF2//STK38//STK40
GO:0008376	acetylgalactosaminyltransferase_activity	Molecular Function	2	48	58	15624	0.013694	0.180091	1.86347	11.2241	0.0344828	EXTL2//GALNT2
GO:0004713	protein_tyrosine_kinase_activity	Molecular Function	3	139	58	15624	0.0148894	0.180091	1.82712	5.81394	0.0517241	BAZ1B//FER//PTK2B
GO:0030145	manganese_ion_binding	Molecular Function	2	63	58	15624	0.0228849	0.240246	1.64045	8.55172	0.0344828	EXTL2//GALNT2
GO:0004674	protein_serine|threonine_kinase_activity	Molecular Function	5	446	58	15624	0.0246189	0.240246	1.60873	3.01995	0.0862069	ARAF//DAPK3//PTK2B//STK38//STK40
GO:0042393	histone_binding	Molecular Function	3	202	58	15624	0.0390984	0.251174	1.40784	4.00068	0.0517241	BAZ1B//BAZ2A//CBX4
GO:0008134	transcription_factor_binding	Molecular Function	6	681	58	15624	0.0398594	0.251174	1.39947	2.37339	0.103448	BAZ2A//CRTC3//CSDC2//DAPK3//ELK1//FOXC1
GO:0003723	RNA_binding	Molecular Function	11	1665	58	15624	0.0405438	0.251174	1.39208	1.77968	0.189655	BAZ2A//C12orf65//CBX4//CNP//CSDC2//HIST1H1E//PCDHGA9//R3HDM2//SRP72//TPD52L2//TRIM21
GO:0008081	phosphoric_diester_hydrolase_activity	Molecular Function	2	95	58	15624	0.0485374	0.2743	1.31392	5.67114	0.0344828	CNP//PDE6D
GO:0030554	adenyl_nucleotide_binding	Molecular Function	10	1551	58	15624	0.0577554	0.293611	1.23841	1.73681	0.172414	ACBD5//ARAF//BAZ1B//DAPK3//FER//HIST1H1E//PTK2B//STK38//STK40//WRNIP1
GO:0000149	SNARE_binding	Molecular Function	2	113	58	15624	0.0659653	0.298944	1.18068	4.76778	0.0344828	SEC24C//SNAP23
GO:0016740	transferase_activity	Molecular Function	13	2347	58	15624	0.0863004	0.326501	1.06399	1.49209	0.224138	ARAF//BAZ1B//CBX4//DAPK3//EXTL2//FER//GALNT2//PTK2B//RASSF2//STK38//STK40//TRIM21//UBE2V1
GO:0000166	nucleotide_binding	Molecular Function	12	2146	58	15624	0.0930278	0.326501	1.03139	1.50631	0.206897	ACBD5//ARAF//BAZ1B//CNP//DAPK3//FER//HIST1H1E//PTK2B//SLC27A1//STK38//STK40//WRNIP1
GO:0005524	ATP_binding	Molecular Function	9	1481	58	15624	0.0944076	0.326501	1.02499	1.63701	0.155172	ARAF//BAZ1B//DAPK3//FER//HIST1H1E//PTK2B//STK38//STK40//WRNIP1

## Sheet: KEGG
Column "ID" stands for pathway identifier used in KEGG
Column "Term" stands for the name of the pathway
Column "WebSite"stands for The map's website,the nodes with red frame and red symbol are associated with the DE genes, green nodes have no significance
Column "Count" stands for the count of the DE genes directly associated with the listed pathway
Column "Size" stands for the count of the chosen background population genes associated with the listed pathway
Column "numInt" stands for the total number of the DE genes
Column "numTotal" stands for the total number of background population genes
Column "p_value" stands for the enrichment p-value of the pathway used Fisher exact test
Column "fdr" stands for the false discovery rate of the pathway
Column "Enrichment_Score" stands for the Enrichment Score value of the pathway, it equals "-log10(p_value)"
Column "GeneRatio" stands for the Gene Ratio value of the pathway, it equals "Count/numInt"
Column "Genes" stands for the DE genes associated with the pathway
ID	Term	WebSite	Count	Size	numInt	numTotal	p_value	fdr	Enrichment_Score	GeneRatio	Genes
hsa05161	Hepatitis_B	http://www.genome.jp/kegg-bin/show_pathway?hsa05161+369+1388+2002+2185	4	162	30	7915	0.00305986	0.223397	2.5143	0.133333	ARAF//ATF6B//ELK1//PTK2B
hsa04912	GnRH_signaling_pathway	http://www.genome.jp/kegg-bin/show_pathway?hsa04912+2002+283748+2185	3	93	30	7915	0.00506778	0.223397	2.29518	0.1	ELK1//PLA2G4D//PTK2B
hsa05020	Prion_diseases	http://www.genome.jp/kegg-bin/show_pathway?hsa05020+730+2002	2	35	30	7915	0.0076463	0.223397	2.11655	0.0666667	C7//ELK1
hsa05166	Human_T-cell_leukemia_virus_1_infection	http://www.genome.jp/kegg-bin/show_pathway?hsa05166+1388+64784+2002+3106	4	219	30	7915	0.00888504	0.223397	2.05134	0.133333	ATF6B//CRTC3//ELK1//HLA-B
hsa05163	Human_cytomegalovirus_infection	http://www.genome.jp/kegg-bin/show_pathway?hsa05163+1388+2002+3106+2185	4	225	30	7915	0.00975209	0.223397	2.0109	0.133333	ATF6B//ELK1//HLA-B//PTK2B
hsa05219	Bladder_cancer	http://www.genome.jp/kegg-bin/show_pathway?hsa05219+369+1613	2	41	30	7915	0.0103906	0.223397	1.98336	0.0666667	ARAF//DAPK3
hsa04650	Natural_killer_cell_mediated_cytotoxicity	http://www.genome.jp/kegg-bin/show_pathway?hsa04650+369+3106+2185	3	131	30	7915	0.0129832	0.239261	1.88662	0.1	ARAF//HLA-B//PTK2B
hsa04921	Oxytocin_signaling_pathway	http://www.genome.jp/kegg-bin/show_pathway?hsa04921+2002+283748+5997	3	153	30	7915	0.0196282	0.276754	1.70712	0.1	ELK1//PLA2G4D//RGS2
hsa05213	Endometrial_cancer	http://www.genome.jp/kegg-bin/show_pathway?hsa05213+369+2002	2	58	30	7915	0.0201294	0.276754	1.69617	0.0666667	ARAF//ELK1
hsa04730	Long-term_depression	http://www.genome.jp/kegg-bin/show_pathway?hsa04730+369+283748	2	60	30	7915	0.0214538	0.276754	1.6685	0.0666667	ARAF//PLA2G4D
hsa04721	Synaptic_vesicle_cycle	http://www.genome.jp/kegg-bin/show_pathway?hsa04721+1173+8992	2	78	30	7915	0.0349044	0.409334	1.45712	0.0666667	AP2M1//ATP6V0E1
hsa04012	ErbB_signaling_pathway	http://www.genome.jp/kegg-bin/show_pathway?hsa04012+369+2002	2	85	30	7915	0.0408256	0.438876	1.38907	0.0666667	ARAF//ELK1
hsa04928	Parathyroid_hormone_synthesis_secretion_and_action	http://www.genome.jp/kegg-bin/show_pathway?hsa04928+369+1388	2	106	30	7915	0.0606201	0.457645	1.21738	0.0666667	ARAF//ATF6B
hsa04144	Endocytosis	http://www.genome.jp/kegg-bin/show_pathway?hsa04144+1173+3106+84313	3	248	30	7915	0.0663036	0.457645	1.17846	0.1	AP2M1//HLA-B//VPS25
hsa04726	Serotonergic_synapse	http://www.genome.jp/kegg-bin/show_pathway?hsa04726+369+283748	2	113	30	7915	0.0678271	0.457645	1.1686	0.0666667	ARAF//PLA2G4D
hsa04935	Growth_hormone_synthesis_secretion_and_action	http://www.genome.jp/kegg-bin/show_pathway?hsa04935+1388+2689	2	119	30	7915	0.0742218	0.457645	1.12947	0.0666667	ATF6B//GH2
hsa04611	Platelet_activation	http://www.genome.jp/kegg-bin/show_pathway?hsa04611+283748+8773	2	124	30	7915	0.0796953	0.457645	1.09857	0.0666667	PLA2G4D//SNAP23
hsa04270	Vascular_smooth_muscle_contraction	http://www.genome.jp/kegg-bin/show_pathway?hsa04270+369+283748	2	132	30	7915	0.0887093	0.457645	1.05203	0.0666667	ARAF//PLA2G4D
hsa05322	Systemic_lupus_erythematosus	http://www.genome.jp/kegg-bin/show_pathway?hsa05322+730+6737	2	133	30	7915	0.0898572	0.457645	1.04645	0.0666667	C7//TRIM21
hsa04910	Insulin_signaling_pathway	http://www.genome.jp/kegg-bin/show_pathway?hsa04910+369+2002	2	137	30	7915	0.0944936	0.457645	1.0246	0.0666667	ARAF//ELK1
hsa04915	Estrogen_signaling_pathway	http://www.genome.jp/kegg-bin/show_pathway?hsa04915+1388+3857	2	137	30	7915	0.0944936	0.457645	1.0246	0.0666667	ATF6B//KRT9
hsa04010	MAPK_signaling_pathway	http://www.genome.jp/kegg-bin/show_pathway?hsa04010+369+2002+283748	3	295	30	7915	0.0994235	0.457645	1.00251	0.1	ARAF//ELK1//PLA2G4D
