# Supplementary material for: Comprehensive analysis of circRNA expression profiles and circRNA-associated competing endogenous RNA networks in IgA nephropathy
Source: PeerJ. 2020 Dec 3;8:e10395. doi: 10.7717/peerj.10395 (PMC7719294; doi:10.7717/peerj.10395)
Supplement: Supplemental Information 9 [file peerj-08-10395-s009.xlsx]

## Sheet: ASB16
sample	actin Ct	ASB16 ct	△Ct	sample	actin Ct	ASB16 ct	△Ct	CHOP	2-△△Ct	Average	SD
con-1	21.2633	27.18	5.91667	con-1	21.38	27.28	5.9	0.0166667	1.01162
con-1	21.2633	27.18	5.91667	con-1	21.08	27.04	5.96	-0.0433333	0.97041
con-1	21.2633	27.18	5.91667	con-1	21.33	27.22	5.89	0.0266667	1.01866	1.00023	0.0260619
con-1	21.2633	27.18	5.91667	con-2	21.12	26.42	5.3	0.616667	1.53333
con-1	21.2633	27.18	5.91667	con-2	21.43	26.53	5.1	0.816667	1.76133
con-1	21.2633	27.18	5.91667	con-2	21.51	26.56	5.05	0.866667	1.82344	1.70604	0.152759
con-1	21.2633	27.18	5.91667	con-3	21.32	27.14	5.82	0.0966667	1.0693
con-1	21.2633	27.18	5.91667	con-3	21.31	27.02	5.71	0.206667	1.15402
con-1	21.2633	27.18	5.91667	con-3	21.3	26.94	5.64	0.276667	1.21139	1.1449	0.0714836
con-1	21.2633	27.18	5.91667	con-4	21.46	26.74	5.28	0.636667	1.55473
con-1	21.2633	27.18	5.91667	con-4	21.48	27.14	5.66	0.256667	1.19472
con-1	21.2633	27.18	5.91667	con-4	21.51	26.69	5.18	0.736667	1.66632	1.47192	0.246467
con-1	21.2633	27.18	5.91667	IgAN-1	21.29	26.06	4.77	1.14667	2.21402
con-1	21.2633	27.18	5.91667	IgAN-1	21.67	25.89	4.22	1.69667	3.24151
con-1	21.2633	27.18	5.91667	IgAN-1	21.47	26.19	4.72	1.19667	2.29209	2.58254	0.572019
con-1	21.2633	27.18	5.91667	IgAN-2	21.57	26.55	4.98	0.936667	1.9141
con-1	21.2633	27.18	5.91667	IgAN-2	21.37	26.43	5.06	0.856667	1.81085
con-1	21.2633	27.18	5.91667	IgAN-2	21.37	26.35	4.98	0.936667	1.9141	1.87968	0.059612
con-1	21.2633	27.18	5.91667	IgAN-3	21.3	26.24	4.94	0.976667	1.96791
con-1	21.2633	27.18	5.91667	IgAN-3	21.31	26.02	4.71	1.20667	2.30804
con-1	21.2633	27.18	5.91667	IgAN-3	21.19	25.9	4.71	1.20667	2.30804	2.19466	0.196371
con-1	21.2633	27.18	5.91667	IgAN-4	21.2	26.04	4.84	1.07667	2.10916
con-1	21.2633	27.18	5.91667	IgAN-4	21.02	26.21	5.19	0.726667	1.65481
con-1	21.2633	27.18	5.91667	IgAN-4	21.12	26.23	5.11	0.806667	1.74917	1.83771	0.239766

## Sheet: HLA-B
sample	actin Ct	HLA-B ct	△Ct	sample	actin Ct	HLA-B ct	△Ct	-△△Ct	2-△△Ct	Average	SD
con-1	21.2633	17.9433	-3.32	con-1	21.38	18.15	-3.23	-0.09	0.939523
con-1	21.2633	17.9433	-3.32	con-1	21.08	17.76	-3.32	-3.55271e-15	1
con-1	21.2633	17.9433	-3.32	con-1	21.33	17.92	-3.41	0.09	1.06437	1.0013	0.0624338
con-1	21.2633	17.9433	-3.32	con-2	21.12	17.28	-3.84	0.52	1.43396
con-1	21.2633	17.9433	-3.32	con-2	21.43	17.63	-3.8	0.48	1.39474
con-1	21.2633	17.9433	-3.32	con-2	21.51	17.17	-4.34	1.02	2.02792	1.61887	0.354787
con-1	21.2633	17.9433	-3.32	con-3	21.32	18.52	-2.8	-0.52	0.697372
con-1	21.2633	17.9433	-3.32	con-3	21.31	18.47	-2.84	-0.48	0.716978
con-1	21.2633	17.9433	-3.32	con-3	21.3	18.22	-3.08	-0.24	0.846745	0.753698	0.0811752
con-1	21.2633	17.9433	-3.32	con-4	21.46	18.53	-2.93	-0.39	0.76313
con-1	21.2633	17.9433	-3.32	con-4	21.48	18.15	-3.33	0.01	1.00696
con-1	21.2633	17.9433	-3.32	con-4	21.51	18.08	-3.43	0.11	1.07923	0.949771	0.165626
con-1	21.2633	17.9433	-3.32	IgAN-1	21.29	16.13	-5.16	1.84	3.5801
con-1	21.2633	17.9433	-3.32	IgAN-1	21.67	16.15	-5.52	2.2	4.59479
con-1	21.2633	17.9433	-3.32	IgAN-1	21.47	15.94	-5.53	2.21	4.62675	4.26722	0.595274
con-1	21.2633	17.9433	-3.32	IgAN-2	21.57	16.92	-4.65	1.33	2.51403
con-1	21.2633	17.9433	-3.32	IgAN-2	21.37	16.79	-4.58	1.26	2.39496
con-1	21.2633	17.9433	-3.32	IgAN-2	21.37	16.54	-4.83	1.51	2.8481	2.58569	0.234919
con-1	21.2633	17.9433	-3.32	IgAN-3	21.3	16.61	-4.69	1.37	2.58471
con-1	21.2633	17.9433	-3.32	IgAN-3	21.31	16.78	-4.53	1.21	2.31338
con-1	21.2633	17.9433	-3.32	IgAN-3	21.19	17.05	-4.14	0.82	1.76541	2.22116	0.417361
con-1	21.2633	17.9433	-3.32	IgAN-4	21.2	16.74	-4.46	1.14	2.20381
con-1	21.2633	17.9433	-3.32	IgAN-4	21.02	16.6	-4.42	1.1	2.14355
con-1	21.2633	17.9433	-3.32	IgAN-4	21.12	16.76	-4.36	1.04	2.05623	2.13453	0.0742035

## Sheet: SEC24C
sample	actin Ct	SEC24C ct	△Ct	sample	actin Ct	SEC24C ct	△Ct	-△△Ct	2-△△Ct	Average	SD
con-1	21.2633	28.22	6.95667	con-1	21.38	28.41	7.03	-0.0733333	0.950439
con-1	21.2633	28.22	6.95667	con-1	21.08	28.18	7.1	-0.143333	0.905425
con-1	21.2633	28.22	6.95667	con-1	21.33	28.07	6.74	0.216667	1.16205	1.00597	0.137027
con-1	21.2633	28.22	6.95667	con-2	21.12	27.71	6.59	0.366667	1.28937
con-1	21.2633	28.22	6.95667	con-2	21.43	27.76	6.33	0.626667	1.54399
con-1	21.2633	28.22	6.95667	con-2	21.51	28.12	6.61	0.346667	1.27162	1.36833	0.15239
con-1	21.2633	28.22	6.95667	con-3	21.32	27.68	6.36	0.596667	1.51222
con-1	21.2633	28.22	6.95667	con-3	21.31	27.44	6.13	0.826667	1.77358
con-1	21.2633	28.22	6.95667	con-3	21.3	27.56	6.26	0.696667	1.62076	1.63552	0.131306
con-1	21.2633	28.22	6.95667	con-4	21.46	28.34	6.88	0.0766667	1.05458
con-1	21.2633	28.22	6.95667	con-4	21.48	28.3	6.82	0.136667	1.09936
con-1	21.2633	28.22	6.95667	con-4	21.51	28.31	6.8	0.156667	1.11471	1.08955	0.0312428
con-1	21.2633	28.22	6.95667	IgAN-1	21.29	29.14	7.85	-0.893333	0.538369
con-1	21.2633	28.22	6.95667	IgAN-1	21.67	29.23	7.56	-0.603333	0.658231
con-1	21.2633	28.22	6.95667	IgAN-1	21.47	29.35	7.88	-0.923333	0.527289	0.57463	0.0726127
con-1	21.2633	28.22	6.95667	IgAN-2	21.57	28.59	7.02	-0.0633333	0.95705
con-1	21.2633	28.22	6.95667	IgAN-2	21.37	28.78	7.41	-0.453333	0.730353
con-1	21.2633	28.22	6.95667	IgAN-2	21.37	28.66	7.29	-0.333333	0.793701	0.827035	0.116967
con-1	21.2633	28.22	6.95667	IgAN-3	21.3	29.48	8.18	-1.22333	0.428292
con-1	21.2633	28.22	6.95667	IgAN-3	21.31	29.35	8.04	-1.08333	0.471937
con-1	21.2633	28.22	6.95667	IgAN-3	21.19	29.24	8.05	-1.09333	0.468677	0.456302	0.0243122
con-1	21.2633	28.22	6.95667	IgAN-4	21.2	28.01	6.81	0.146667	1.10701
con-1	21.2633	28.22	6.95667	IgAN-4	21.02	28.28	7.26	-0.303333	0.810378
con-1	21.2633	28.22	6.95667	IgAN-4	21.12	28.16	7.04	-0.0833333	0.943874	0.953754	0.148562

## Sheet: TRIM21
sample	actin Ct	TRIM21 Ct	△Ct	sample	actin Ct	TRIM21 Ct	△Ct	-△△Ct	2-△△Ct	Average	SD
con-1	21.2633	24.14	2.87667	con-1	21.38	24.16	2.78	0.0966667	1.0693
con-1	21.2633	24.14	2.87667	con-1	21.08	24.23	3.15	-0.273333	0.827406
con-1	21.2633	24.14	2.87667	con-1	21.33	24.03	2.7	0.176667	1.13027	1.00899	0.160186
con-1	21.2633	24.14	2.87667	con-2	21.12	24.23	3.11	-0.233333	0.850667
con-1	21.2633	24.14	2.87667	con-2	21.43	23.87	2.44	0.436667	1.35347
con-1	21.2633	24.14	2.87667	con-2	21.51	23.73	2.22	0.656667	1.57644	1.26019	0.371768
con-1	21.2633	24.14	2.87667	con-3	21.32	24.68	3.36	-0.483333	0.715323
con-1	21.2633	24.14	2.87667	con-3	21.31	24.34	3.03	-0.153333	0.899171
con-1	21.2633	24.14	2.87667	con-3	21.3	24.42	3.12	-0.243333	0.844791	0.819762	0.0944449
con-1	21.2633	24.14	2.87667	con-4	21.46	24.68	3.22	-0.343333	0.788218
con-1	21.2633	24.14	2.87667	con-4	21.48	24.58	3.1	-0.223333	0.856584
con-1	21.2633	24.14	2.87667	con-4	21.51	24.55	3.04	-0.163333	0.89296	0.845921	0.0531787
con-1	21.2633	24.14	2.87667	IgAN-1	21.29	24.01	2.72	0.156667	1.11471
con-1	21.2633	24.14	2.87667	IgAN-1	21.67	23.6	1.93	0.946667	1.92741
con-1	21.2633	24.14	2.87667	IgAN-1	21.47	23.72	2.25	0.626667	1.54399	1.52871	0.406568
con-1	21.2633	24.14	2.87667	IgAN-2	21.57	23.85	2.28	0.596667	1.51222
con-1	21.2633	24.14	2.87667	IgAN-2	21.37	23.54	2.17	0.706667	1.63203
con-1	21.2633	24.14	2.87667	IgAN-2	21.37	23.38	2.01	0.866667	1.82344	1.6559	0.15698
con-1	21.2633	24.14	2.87667	IgAN-3	21.3	23.47	2.17	0.706667	1.63203
con-1	21.2633	24.14	2.87667	IgAN-3	21.31	23.5	2.19	0.686667	1.60956
con-1	21.2633	24.14	2.87667	IgAN-3	21.19	23.24	2.05	0.826667	1.77358	1.67172	0.0889248
con-1	21.2633	24.14	2.87667	IgAN-4	21.2	23.92	2.72	0.156667	1.11471
con-1	21.2633	24.14	2.87667	IgAN-4	21.02	23.77	2.75	0.126667	1.09177
con-1	21.2633	24.14	2.87667	IgAN-4	21.12	23.61	2.49	0.386667	1.30737	1.17128	0.118412
